# Supplementary material for: Exosomal hsa_circ_0007047 Attenuates Pos-myocardial Infarction Remodeling by Promoting Angiogenesis via miR-1178-3p/PDPK1 Axis
Source: Research Square preprint supplement (doi:10.21203/rs.3.rs-827822/v1), 2021-09-01
Supplement: Supplementary file 1 [file 0e6e1a9c794fdacf5431a48d.xlsx]

## Sheet: Al-C vs Al-N
CircID	AI_C	AI_N	baseMean	log2FoldChange	lfcSE	stat	pvalue	padj	circID.db	chr	start	end	strand	genomic length	spliced seq length	samples	repeats	annotation	best transcript	gene symbol	circRNA study	cirbase_link
chr4_122199450_122192229_-7221	73.8066	0	36.9033	23.7817	3.02725	7.85587	3.96994e-15	1.11914e-11	--	--	--	--	--	--	--	--	--	--	--	--	--	--
chr17_50741731_50741102_-629	64.8649	0	32.4324	23.609	3.0274	7.79844	6.26788e-15	1.11914e-11	hsa_circ_0044623	chr17	50741101	50741731	+	630	220	K562, Ag04450	--	ANNOTATED, CDS, coding, INTERNAL, OVCODE, OVEXON	NM_016424	LUC7L3	Salzman2013	http://www.circbase.org/cgi-bin/singlerecord.cgi?id=hsa_circ_0044623
chr6_13642591_13632370_-10221	61.084	0	30.542	23.4987	3.02747	7.76183	8.37105e-15	1.11914e-11	--	--	--	--	--	--	--	--	--	--	--	--	--	--
chr10_7381949_7363878_-18071	56.3858	0	28.1929	23.4159	3.02758	7.7342	1.04057e-14	1.11914e-11	hsa_circ_0000212	chr10	7363877	7381949	-	18072	4258	cd_19	None	ALT_DONOR, CDS, coding, INTERNAL, intronic, UTR5	NM_001018039	SFMBT2	Memczak2013	http://www.circbase.org/cgi-bin/singlerecord.cgi?id=hsa_circ_0000212
chr9_289581_271627_-17954	47.5799	0	23.7899	23.1875	3.02783	7.65811	1.88692e-14	1.30204e-11	hsa_circ_0086188	chr9	271626	289581	+	17955	351	K562, Gm12878, Mcf7	--	ANNOTATED, CDS, coding, INTERNAL, OVCODE, OVERLAPTX, OVEXON	NM_203447	DOCK8	Salzman2013	http://www.circbase.org/cgi-bin/singlerecord.cgi?id=hsa_circ_0086188
chr4_73092300_73078642_-13658	46.0271	0	23.0135	23.1428	3.02789	7.64322	2.11862e-14	1.30204e-11	hsa_circ_0006693	chr4	73078641	73092300	-	13659	2081	Hs68_RNase, Hs68_control, K562, Helas3, H1hesc, Gm12878, Nhek	None	ANNOTATED, CDS, coding, INTERNAL, OVCODE, OVEXON	NM_032217	ANKRD17	Jeck2013, Salzman2013	http://www.circbase.org/cgi-bin/singlerecord.cgi?id=hsa_circ_0006693
chrx_55731586_55729294_-2292	46.0271	0	23.0135	23.1428	3.02789	7.64322	2.11862e-14	1.30204e-11	--	--	--	--	--	--	--	--	--	--	--	--	--	--
chr10_48901863_48890579_-11284	43.0415	0	21.5207	23.0466	3.02801	7.61114	2.71696e-14	1.35724e-11	--	--	--	--	--	--	--	--	--	--	--	--	--	--
chr6_129618852_129599216_-19636	42.8202	0	21.4101	23.0294	3.02802	7.60544	2.83942e-14	1.35724e-11	--	--	--	--	--	--	--	--	--	--	--	--	--	--
chr15_90443478_90439332_-4146	143.11	0	71.5552	9.97952	2.42229	4.11987	3.7908e-05	0.00509625	hsa_circ_0000651	chr15	90439331	90443478	+	4147	446	cd_19, neutr, Hs68_RNase, Hs68_control, K562, Helas3, H1hesc, Gm12878, Ag04450, A549, Sknshra	None	ANNOTATED, CDS, coding, INTERNAL, OVCODE, OVEXON	NM_003870	IQGAP1	Jeck2013, Memczak2013, Salzman2013	http://www.circbase.org/cgi-bin/singlerecord.cgi?id=hsa_circ_0000651
chr11_86031611_85990250_-41361	117.04	0	58.5199	9.68925	2.47028	3.92233	8.76951e-05	0.011096	--	--	--	--	--	--	--	--	--	--	--	--	--	--
chr9_132311856_132296887_-14969	116.437	0	58.2184	9.68236	2.45438	3.94492	7.9825e-05	0.0104063	hsa_circ_0089282	chr9	132296886	132311856	-	14970	675	K562, Gm12878, Sknshra	--	ANNOTATED, CDS, coding, INTERNAL, OVCODE, OVEXON	NM_015046	SETX	Salzman2013	http://www.circbase.org/cgi-bin/singlerecord.cgi?id=hsa_circ_0089282
chr9_33953474_33944365_-9109	0	44.8612	22.4306	-7.78406	2.22327	-3.50118	0.000463201	0.0498173	hsa_circ_0086713	chr9	33944364	33953474	-	9110	679	Ag04450, Nhek	--	ANNOTATED, CDS, coding, INTERNAL, OVCODE, OVEXON	NM_018449	UBAP2	Salzman2013	http://www.circbase.org/cgi-bin/singlerecord.cgi?id=hsa_circ_0086713
chr2_58060201_58058352_-1849	0	46.2356	23.1178	-7.82666	2.16698	-3.61178	0.000304108	0.0344282	--	--	--	--	--	--	--	--	--	--	--	--	--	--
chr2_62996766_62979191_-17575	0	62.8291	31.4145	-8.26951	2.11488	-3.91015	9.2239e-05	0.0113375	--	--	--	--	--	--	--	--	--	--	--	--	--	--
chr19_29986417_29985223_-1194	0	77.4653	38.7326	-8.57158	2.42083	-3.54077	0.000398968	0.0440093	hsa_circ_0000921	chr19	29985222	29986417	+	1195	215	HEK293, cd_19, Hs68_RNase, Hs68_control, Nhek, K562, Huvec, Hsmm, Hmec, Hepg2, Helas3, H1hesc, Gm12878, Bj, Ag04450, A549, Sknshra, Mcf7	None	ANNOTATED, CDS, coding, INTERNAL, OVCODE, OVEXON	NM_134447	C19orf2	Jeck2013, Memczak2013, Salzman2013	http://www.circbase.org/cgi-bin/singlerecord.cgi?id=hsa_circ_0000921
chr15_58919972_58912563_-7409	0	103.776	51.8882	-8.99403	2.40289	-3.74301	0.000181829	0.0217286	--	--	--	--	--	--	--	--	--	--	--	--	--	--
chr9_96565483_96522506_-42977	0	251.717	125.859	-10.2721	2.77354	-3.70361	0.00021255	0.0247133	hsa_circ_0087641	chr9	96522505	96565483	-	42978	1183	K562, Hepg2, Helas3, H1hesc, Bj, Ag04450, A549, Nhek, Sknshra, Mcf7	--	ANNOTATED, CDS, coding, INTERNAL, OVCODE, OVEXON	NM_033331	CDC14B	Salzman2013	http://www.circbase.org/cgi-bin/singlerecord.cgi?id=hsa_circ_0087641
chr5_97028612_96985080_-43532	0	43.3109	21.6555	-20.2265	3.02746	-6.68103	2.37268e-11	3.29267e-09	--	--	--	--	--	--	--	--	--	--	--	--	--	--
chr6_16290623_16285791_-4832	0	40.2126	20.1063	-21.6057	3.02756	-7.13636	9.58363e-13	1.37429e-10	--	--	--	--	--	--	--	--	--	--	--	--	--	--
chr1_172068907_172042006_-26901	0	41.8597	20.9299	-21.6158	3.0275	-7.1398	9.34643e-13	1.37429e-10	--	--	--	--	--	--	--	--	--	--	--	--	--	--
chr18_20992937_20968772_-24165	0	38.4917	19.2458	-21.637	3.02762	-7.14653	8.90015e-13	1.36744e-10	--	--	--	--	--	--	--	--	--	--	--	--	--	--
chr2_64553409_64551443_-1966	0	38.496	19.248	-21.6379	3.02762	-7.14682	8.8809e-13	1.36744e-10	hsa_circ_0001021	chr2	64551442	64553409	+	1967	1967	cd_19, Nhek, K562, Helas3, Gm12878, Bj, Ag04450, A549, Mcf7	None	ANNOTATED, CDS, coding, INTERNAL, UTR5	NM_017657	AFTPH	Memczak2013, Salzman2013	http://www.circbase.org/cgi-bin/singlerecord.cgi?id=hsa_circ_0001021
chr2_32401623_32377588_-24035	0	38.9749	19.4875	-21.6401	3.0276	-7.14761	8.83017e-13	1.36744e-10	hsa_circ_0007337	chr2	32377587	32401623	+	24036	1093	Hs68_RNase, Hs68_control, K562, Helas3, H1hesc, Gm12878, Bj, Ag04450	None	ANNOTATED, CDS, coding, INTERNAL, OVCODE, OVEXON	NM_016252	BIRC6	Jeck2013, Salzman2013	http://www.circbase.org/cgi-bin/singlerecord.cgi?id=hsa_circ_0007337
chr11_108335961_108327645_-8316	0	43.8846	21.9423	-21.8195	3.02744	-7.20723	5.71012e-13	9.82598e-11	hsa_circ_0024233	chr11	108327644	108335961	+	8317	1293	Helas3, Gm12878	--	ANNOTATED, CDS, coding, INTERNAL, OVCODE, OVERLAPTX, OVEXON	NM_000051	ATM	Salzman2013	http://www.circbase.org/cgi-bin/singlerecord.cgi?id=hsa_circ_0024233
chr10_20177410_20176997_-413	0	48.5843	24.2921	-21.8386	3.02732	-7.21384	5.43971e-13	9.75068e-11	--	--	--	--	--	--	--	--	--	--	--	--	--	--
chr11_118592856_118583179_-9677	0	44.856	22.428	-21.847	3.02742	-7.21639	5.33852e-13	9.75068e-11	hsa_circ_0024474	chr11	118583178	118592856	+	9678	865	Bj	--	ANNOTATED, CDS, coding, INTERNAL, OVCODE, OVEXON	NM_001655	ARCN1	Salzman2013	http://www.circbase.org/cgi-bin/singlerecord.cgi?id=hsa_circ_0024474
chr2_37201726_37199704_-2022	0	48.4775	24.2387	-21.8964	3.02732	-7.23294	4.72665e-13	9.24276e-11	hsa_circ_0007047	chr2	37199703	37201726	+	2023	246	Hs68_RNase, Hs68_control, K562, Helas3, Gm12878	None	ANNOTATED, INTERNAL, ncRNA, OVERLAPTX, OVEXON	NR_037879	LOC100505876	Jeck2013, Salzman2013	http://www.circbase.org/cgi-bin/singlerecord.cgi?id=hsa_circ_0007047
chr8_43172386_43158575_-13811	0	49.4418	24.7209	-21.9857	3.0273	-7.26249	3.80034e-13	7.78527e-11	--	--	--	--	--	--	--	--	--	--	--	--	--	--
chr2_169557297_169555124_-2173	0	56.7422	28.3711	-22.0736	3.02716	-7.29185	3.05717e-13	6.57597e-11	hsa_circ_0002377	chr2	169555123	169557297	-	2174	243	Hs68_RNase, Hs68_control, Nhek, K562, H1hesc, Bj	None	ANNOTATED, CDS, coding, INTERNAL, OVCODE, OVEXON	NM_024622	FASTKD1	Jeck2013, Salzman2013	http://www.circbase.org/cgi-bin/singlerecord.cgi?id=hsa_circ_0002377
chr17_30492753_30481143_-11610	0	52.8755	26.4377	-22.0768	3.02723	-7.29273	3.03731e-13	6.57597e-11	hsa_circ_0042839	chr17	30481142	30492753	+	11611	484	Ag04450	--	ANNOTATED, CDS, coding, INTERNAL, OVCODE, OVEXON	NM_004871	GOSR1	Salzman2013	http://www.circbase.org/cgi-bin/singlerecord.cgi?id=hsa_circ_0042839
chr19_23374764_23373742_-1022	0	52.9816	26.4908	-22.0813	3.02723	-7.29423	3.00373e-13	6.57597e-11	--	--	--	--	--	--	--	--	--	--	--	--	--	--
chr3_37096660_37083636_-13024	0	56.8438	28.4219	-22.179	3.02716	-7.32668	2.35916e-13	5.97006e-11	--	--	--	--	--	--	--	--	--	--	--	--	--	--
chr15_23037152_23030885_-6267	0	58.0641	29.0321	-22.2095	3.02714	-7.33679	2.18773e-13	5.88225e-11	hsa_circ_0034048	chr15	23030884	23037152	-	6268	476	K562, Ag04450, A549	--	ANNOTATED, CDS, coding, INTERNAL, OVCODE, OVEXON	NM_052903	TUBGCP5	Salzman2013	http://www.circbase.org/cgi-bin/singlerecord.cgi?id=hsa_circ_0034048
chr3_171085229_171068848_-16381	0	59.0419	29.521	-22.2309	3.02712	-7.34391	2.07447e-13	5.88225e-11	--	--	--	--	--	--	--	--	--	--	--	--	--	--
chr18_42067513_42057883_-9630	0	59.3238	29.6619	-22.2397	3.02712	-7.34682	2.02981e-13	5.88225e-11	hsa_circ_0047499	chr18	42057882	42067513	+	9631	386	Nhek, K562, Hepg2, Helas3, Gm12878	--	ANNOTATED, CDS, coding, INTERNAL, OVCODE, OVEXON	NM_002647	PIK3C3	Salzman2013	http://www.circbase.org/cgi-bin/singlerecord.cgi?id=hsa_circ_0047499
chr1_28581225_28580556_-669	0	69.6674	34.8337	-22.4608	3.02698	-7.42019	1.16949e-13	3.87012e-11	--	--	--	--	--	--	--	--	--	--	--	--	--	--
chr7_77585581_77571078_-14503	0	71.6165	35.8082	-22.5017	3.02696	-7.43376	1.05552e-13	3.78403e-11	--	--	--	--	--	--	--	--	--	--	--	--	--	--
chr7_92234923_92221902_-13021	0	74.2375	37.1187	-22.551	3.02693	-7.45013	9.32498e-14	3.64692e-11	--	--	--	--	--	--	--	--	--	--	--	--	--	--
chr9_33973237_33971651_-1586	0	82.5817	41.2908	-22.7011	3.02685	-7.4999	6.38642e-14	2.74744e-11	hsa_circ_0001851	chr9	33971650	33973237	-	1587	159	cd_19, Hs68_RNase, Hs68_control, K562, Huvec, Hepg2, Helas3, Gm12878, Bj, Ag04450, A549, Nhek, Sknshra	None	ANNOTATED, CDS, coding, INTERNAL, OVCODE, OVEXON	NM_018449	UBAP2	Jeck2013, Memczak2013, Salzman2013	http://www.circbase.org/cgi-bin/singlerecord.cgi?id=hsa_circ_0001851

## Sheet: Al-C vs Al-NC
CircID	AI_C	AI_NC	baseMean	log2FoldChange	lfcSE	stat	pvalue	padj	circID.db	chr	start	end	strand	genomic length	spliced seq length	samples	repeats	annotation	best transcript	gene symbol	circRNA study	cirbase_link
chr10_72715902_72708283_-7619	177.99	0	88.9948	24.6141	3.02654	8.13275	4.19648e-16	1.74322e-12	hsa_circ_0000246	chr10	72708282	72715902	+	7620	7620	cd_19, Hs68_RNase, Hs68_control	None	ALT_ACCEPTOR, ALT_DONOR, coding, INTERNAL, intronic	NM_138357	MCU	Jeck2013, Memczak2013	http://www.circbase.org/cgi-bin/singlerecord.cgi?id=hsa_circ_0000246
chr10_68394451_68393138_-1313	121.336	0	60.6678	24.1051	3.0267	7.96412	1.66397e-15	2.93722e-12	hsa_circ_0000239	chr10	68393137	68394451	-	1314	252	HEK293, Hs68_RNase, Hs68_control	None	ANNOTATED, CDS, coding, INTERNAL, OVCODE, OVEXON	NM_017987	RUFY2	Jeck2013, Memczak2013	http://www.circbase.org/cgi-bin/singlerecord.cgi?id=hsa_circ_0000239
chr13_100309908_100301460_-8448	107.235	0	53.6176	23.9311	3.02677	7.90648	2.64773e-15	2.93722e-12	hsa_circ_0002664	chr13	100301459	100309908	+	8449	364	Hs68_RNase, Hs68_control, K562, Helas3, H1hesc, Gm12878, Bj, Ag04450, A549, Sknshra	None	ANNOTATED, CDS, coding, INTERNAL, OVCODE, OVEXON	NM_000282	PCCA	Jeck2013, Salzman2013	http://www.circbase.org/cgi-bin/singlerecord.cgi?id=hsa_circ_0002664
chr17_29467216_29451455_-15761	104.878	0	52.4389	23.9063	3.02679	7.89826	2.82833e-15	2.93722e-12	hsa_circ_0008866	chr17	29451454	29467216	+	15762	298	Hs68_RNase, Hs68_control, K562, Gm12878, Bj, Ag04450, A549	None	ANNOTATED, CDS, coding, INTERNAL, OVCODE, OVEXON, UTR5	NM_020791	TAOK1	Jeck2013, Salzman2013	http://www.circbase.org/cgi-bin/singlerecord.cgi?id=hsa_circ_0008866
chr6_157084905_157036835_-48070	93.5168	0	46.7584	23.7504	3.02686	7.84656	4.27611e-15	3.55259e-12	hsa_circ_0001658	chr6	157036834	157084905	+	48071	48071	cd_19, Hs68_RNase, Hs68_control, K562, Huvec, Hepg2, Helas3, H1hesc, Gm12878, Bj, Ag04450, A549, Nhek, Nhlf, Sknshra, Mcf7	None	ALT_ACCEPTOR, CDS, coding, INTERNAL, intronic, OVCODE, OVEXON	NM_017519	ARID1B	Jeck2013, Memczak2013, Salzman2013	http://www.circbase.org/cgi-bin/singlerecord.cgi?id=hsa_circ_0001658
chr1_51366029_51363866_-2163	68.8233	0	34.4117	23.333	3.0271	7.70803	1.27776e-14	5.28115e-12	hsa_circ_0012417	chr1	51363865	51366029	-	2164	240	Nhek, K562, Ag04450	--	ANNOTATED, CDS, coding, INTERNAL, OVCODE, OVEXON	NM_001981	EPS15	Salzman2013	http://www.circbase.org/cgi-bin/singlerecord.cgi?id=hsa_circ_0012417
chr3_186306977_186297421_-9556	68.2686	0	34.1343	23.3205	3.02711	7.7039	1.31971e-14	5.28115e-12	--	--	--	--	--	--	--	--	--	--	--	--	--	--
chr9_97330767_97330154_-613	68.063	0	34.0315	23.3152	3.02711	7.70213	1.33812e-14	5.28115e-12	--	--	--	--	--	--	--	--	--	--	--	--	--	--
chr10_32021287_32019858_-1429	63.2366	0	31.6183	23.2104	3.02718	7.66734	1.75597e-14	5.28115e-12	hsa_circ_0006408	chr10	32019857	32021287	-	1430	274	Hs68_RNase, Hs68_control	None	ANNOTATED, CDS, coding, INTERNAL, OVCODE, OVEXON	NM_004521	KIF5B	Jeck2013	http://www.circbase.org/cgi-bin/singlerecord.cgi?id=hsa_circ_0006408
chr11_34978182_34957384_-20798	62.8782	0	31.4391	23.2013	3.02718	7.66431	1.79795e-14	5.28115e-12	hsa_circ_0021712	chr11	34957383	34978182	+	20799	681	K562, Hepg2, Helas3, H1hesc, Gm12878, Bj, Ag04450, A549, Nhek, Sknshra	--	ANNOTATED, CDS, coding, INTERNAL, OVCODE, OVEXON	NM_003477	PDHX	Salzman2013	http://www.circbase.org/cgi-bin/singlerecord.cgi?id=hsa_circ_0021712
chr4_48171449_48163702_-7747	62.5563	0	31.2782	23.1936	3.02719	7.66175	1.83414e-14	5.28115e-12	--	--	--	--	--	--	--	--	--	--	--	--	--	--
chr20_37065473_37056146_-9327	60.3091	0	30.1546	23.1536	3.02723	7.64845	2.03422e-14	5.28115e-12	hsa_circ_0001153	chr20	37056145	37065473	-	9328	517	cd_34	None	ANNOTATED, CDS, coding, INTERNAL	NM_183404	RBL1	Memczak2013	http://www.circbase.org/cgi-bin/singlerecord.cgi?id=hsa_circ_0001153
chr2_61533903_61498673_-35230	68.9485	0	34.4742	23.1094	3.0271	7.63417	2.27285e-14	5.28115e-12	hsa_circ_0054894	chr2	61498672	61533903	-	35231	765	K562, Huvec, H1hesc, Gm12878, Ag04450	--	ANNOTATED, CDS, coding, INTERNAL, OVCODE, OVEXON, UTR5	NM_003400	XPO1	Salzman2013	http://www.circbase.org/cgi-bin/singlerecord.cgi?id=hsa_circ_0054894
chr8_43013400_43007847_-5553	56.3838	0	28.1919	23.0631	3.0273	7.61837	2.569e-14	5.28115e-12	--	--	--	--	--	--	--	--	--	--	--	--	--	--
chr8_99121445_99096312_-25133	55.7524	0	27.8762	23.0481	3.02731	7.6134	2.66981e-14	5.28115e-12	hsa_circ_0085053	chr8	99096311	99121445	+	25134	915	Mcf7	--	ANNOTATED, CDS, coding, INTERNAL, OVCODE, OVEXON	NM_017890	VPS13B	Salzman2013	http://www.circbase.org/cgi-bin/singlerecord.cgi?id=hsa_circ_0085053
chr19_19474118_19465340_-8778	49.4748	0	24.7374	22.883	3.02745	7.55851	4.07698e-14	6.63341e-12	--	--	--	--	--	--	--	--	--	--	--	--	--	--
chr14_45237721_45231141_-6580	49.6194	0	24.8097	22.8825	3.02745	7.55835	4.08213e-14	6.63341e-12	--	--	--	--	--	--	--	--	--	--	--	--	--	--
chr6_13642591_13632370_-10221	48.1179	0	24.059	22.8474	3.02749	7.54665	4.4659e-14	6.63341e-12	--	--	--	--	--	--	--	--	--	--	--	--	--	--
chr2_23984831_23982896_-1935	47.8249	0	23.9125	22.8231	3.0275	7.5386	4.7505e-14	6.63341e-12	hsa_circ_0003947	chr2	23982895	23984831	+	1936	297	Hs68_RNase, Hs68_control, K562, Sknshra	None	ANNOTATED, CDS, coding, INTERNAL, OVCODE, OVEXON	NM_181713	UBXN2A	Jeck2013, Salzman2013	http://www.circbase.org/cgi-bin/singlerecord.cgi?id=hsa_circ_0003947
chr15_50663046_50643340_-19706	45.6284	0	22.8142	22.7751	3.02756	7.52261	5.3694e-14	6.79952e-12	hsa_circ_0004951	chr15	50643339	50663046	-	19707	532	Hs68_RNase, Hs68_control, K562, Helas3, H1hesc, Gm12878, Bj, Ag04450, A549	None	ANNOTATED, CDS, coding, INTERNAL, OVCODE, OVEXON	NM_017672	TRPM7	Jeck2013, Salzman2013	http://www.circbase.org/cgi-bin/singlerecord.cgi?id=hsa_circ_0004951
chr6_161084617_161080881_-3736	46.5207	0	23.2604	22.7723	3.02753	7.52174	5.4051e-14	6.79952e-12	--	--	--	--	--	--	--	--	--	--	--	--	--	--
chr10_7381949_7363878_-18071	44.4126	0	22.2063	22.7368	3.0276	7.50983	5.92021e-14	7.02644e-12	hsa_circ_0000212	chr10	7363877	7381949	-	18072	4258	cd_19	None	ALT_DONOR, CDS, coding, INTERNAL, intronic, UTR5	NM_001018039	SFMBT2	Memczak2013	http://www.circbase.org/cgi-bin/singlerecord.cgi?id=hsa_circ_0000212
chr7_24668660_24623663_-44997	40.6184	0	20.3092	22.6087	3.02773	7.46723	8.19003e-14	8.11646e-12	--	--	--	--	--	--	--	--	--	--	--	--	--	--
chr2_24139450_24135119_-4331	40.1446	0	20.0723	22.6015	3.02775	7.46479	8.34311e-14	8.11646e-12	hsa_circ_0007270	chr2	24135118	24139450	+	4332	342	Hs68_RNase, Hs68_control	None	ANNOTATED, CDS, coding, INTERNAL, OVCODE, OVEXON	NM_001145710	LOC375190	Jeck2013	http://www.circbase.org/cgi-bin/singlerecord.cgi?id=hsa_circ_0007270
chr1_230961303_230943806_-17497	47.1063	0	23.5531	22.236	3.02752	7.34463	2.06333e-13	1.27926e-11	hsa_circ_0004531	chr1	230943805	230961303	-	17498	401	Hs68_RNase, Hs68_control, K562, Huvec, Hepg2, Helas3, Gm12878, Bj, Ag04450, Sknshra	None	ANNOTATED, CDS, coding, INTERNAL, OVCODE, OVEXON	NM_024525	TTC13	Jeck2013, Salzman2013	http://www.circbase.org/cgi-bin/singlerecord.cgi?id=hsa_circ_0004531
chr9_86310017_86305192_-4825	70.372	0	35.186	21.7575	3.02708	7.18763	6.59237e-13	3.51086e-11	hsa_circ_0001869	chr9	86305191	86310017	-	4826	508	cd_19, Hs68_RNase, Hs68_control, Huvec, Hepg2, H1hesc, Gm12878, Bj, Ag04450, A549, Nhek, Sknshra	None	ANNOTATED, CDS, coding, INTERNAL, OVCODE, OVEXON	NM_001185074	ZCCHC6	Jeck2013, Memczak2013, Salzman2013	http://www.circbase.org/cgi-bin/singlerecord.cgi?id=hsa_circ_0001869
chr16_10982991_10969161_-13830	150.939	0	75.4693	9.71004	2.80386	3.46309	0.000534003	0.0178421	hsa_circ_0004179	chr16	10969160	10982991	+	13831	728	Hs68_RNase, Hs68_control, K562, H1hesc, Gm12878, Bj, Ag04450, Sknshra	None	ANNOTATED, CDS, coding, INTERNAL, OVCODE, OVEXON	NM_015226	CLEC16A	Jeck2013, Salzman2013	http://www.circbase.org/cgi-bin/singlerecord.cgi?id=hsa_circ_0004179
chr3_151356039_151350059_-5980	138.421	0	69.2104	9.58518	2.20423	4.34853	1.37053e-05	0.000685924	--	--	--	--	--	--	--	--	--	--	--	--	--	--
chr1_211793190_211778918_-14272	120.143	0	60.0716	9.38082	2.50953	3.73808	0.000185434	0.00786011	hsa_circ_0002274	chr1	211778917	211793190	-	14273	616	Hs68_RNase, Hs68_control, K562, Gm12878, Ag04450, A549, Sknshra	None	ANNOTATED, CDS, coding, INTERNAL, OVCODE, OVEXON	NM_014873	LPGAT1	Jeck2013, Salzman2013	http://www.circbase.org/cgi-bin/singlerecord.cgi?id=hsa_circ_0002274
chr1_155726019_155721517_-4502	118.9	0	59.4502	9.36578	2.82423	3.31622	0.000912425	0.026505	hsa_circ_0014613	chr1	155721516	155726019	+	4503	304	Nhek, K562, Hepg2, Helas3, H1hesc, Gm12878, Ag04450, A549, Sknshra, Mcf7	--	ANNOTATED, CDS, coding, INTERNAL, OVCODE, OVEXON	NM_001199849	DAP3	Salzman2013	http://www.circbase.org/cgi-bin/singlerecord.cgi?id=hsa_circ_0014613
chr20_35725155_35721740_-3415	107.116	0	53.558	9.21528	2.45003	3.76129	0.00016904	0.00731449	hsa_circ_0001148	chr20	35721739	35725155	-	3416	409	cd_19, cd_34, Hs68_RNase, Hs68_control, K562, Hepg2, Helas3, H1hesc, Gm12878, Bj, Ag04450, Sknshra	None	ANNOTATED, CDS, coding, INTERNAL, ncRNA, OVCODE, OVEXON	NM_001242600	RBM39	Jeck2013, Memczak2013, Salzman2013	http://www.circbase.org/cgi-bin/singlerecord.cgi?id=hsa_circ_0001148
chr5_179593645_179580947_-12698	105.808	0	52.9039	9.19769	2.14458	4.28881	1.79633e-05	0.00088833	--	--	--	--	--	--	--	--	--	--	--	--	--	--
chr18_50940386_50918110_-22276	105.413	0	52.7067	9.19216	2.45205	3.74877	0.000177702	0.00761004	--	--	--	--	--	--	--	--	--	--	--	--	--	--
chr2_47839769_47838859_-910	100.638	0	50.3189	9.12496	2.56996	3.55062	0.000384328	0.0141854	hsa_circ_0003872	chr2	47838858	47839769	-	911	355	Hs68_RNase, Hs68_control, K562, Huvec, Helas3, H1hesc, Gm12878, Ag04450, A549, Sknshra	None	ANNOTATED, CDS, coding, INTERNAL, OVCODE, OVEXON	NM_001190274	FBXO11	Jeck2013, Salzman2013	http://www.circbase.org/cgi-bin/singlerecord.cgi?id=hsa_circ_0003872
chr4_89927968_89909276_-18692	99.3631	0	49.6815	9.10647	2.83014	3.21767	0.00129236	0.0319551	--	--	--	--	--	--	--	--	--	--	--	--	--	--
chr2_171046362_171028339_-18023	97.9134	0	48.9567	9.0854	2.48113	3.6618	0.000250445	0.0104035	hsa_circ_0004442	chr2	171028338	171046362	-	18024	256	Hs68_RNase, Hs68_control, K562, Gm12878, Bj, Ag04450	None	ANNOTATED, CDS, coding, INTERNAL, OVCODE, OVEXON	NM_012290	TLK1	Jeck2013, Salzman2013	http://www.circbase.org/cgi-bin/singlerecord.cgi?id=hsa_circ_0004442
chr2_33222151_33217552_-4599	96.9094	0	48.4547	9.07049	2.48567	3.64911	0.000263149	0.0106409	hsa_circ_0053907	chr2	33217551	33222151	+	4600	175	K562, Bj, Ag04450, A549, Sknshra	--	ANNOTATED, CDS, coding, INTERNAL, OVCODE, OVEXON	NM_206943	LTBP1	Salzman2013	http://www.circbase.org/cgi-bin/singlerecord.cgi?id=hsa_circ_0053907
chr7_77600806_77583555_-17251	95.8209	0	47.9105	9.05471	2.79854	3.23551	0.00121424	0.0318157	hsa_circ_0080838	chr7	77583554	77600806	+	17252	410	K562, Ag04450	--	ANNOTATED, CDS, coding, INTERNAL, OVCODE, OVEXON	NM_002835	PTPN12	Salzman2013	http://www.circbase.org/cgi-bin/singlerecord.cgi?id=hsa_circ_0080838
chr3_47067118_47037666_-29452	95.2115	0	47.6057	9.04491	2.4781	3.64994	0.0002623	0.0106409	hsa_circ_0004692	chr3	47037665	47067118	-	29453	1290	Hs68_RNase, Hs68_control, K562, Helas3, H1hesc, Bj, Ag04450, Sknshra	None	ANNOTATED, CDS, coding, INTERNAL, OVCODE, OVEXON	NM_014159	SETD2	Jeck2013, Salzman2013	http://www.circbase.org/cgi-bin/singlerecord.cgi?id=hsa_circ_0004692
chr12_100298175_100282943_-15232	94.8042	0	47.4021	9.03881	2.8083	3.2186	0.00128816	0.0319551	hsa_circ_0006258	chr12	100282942	100298175	+	15233	508	Hs68_RNase, Hs68_control, Nhek, K562, Huvec, Hepg2, Helas3, H1hesc, Gm12878, Bj, Ag04450, A549, Sknshra, Mcf7	None	ANNOTATED, CDS, coding, INTERNAL, OVCODE, OVEXON, UTR5	NM_017988	SCYL2	Jeck2013, Salzman2013	http://www.circbase.org/cgi-bin/singlerecord.cgi?id=hsa_circ_0006258
chr8_53772167_53769618_-2549	93.6647	0	46.8324	9.02162	2.48361	3.63247	0.000280725	0.011106	--	--	--	--	--	--	--	--	--	--	--	--	--	--
chr1_172068905_172042009_-26896	93.5069	0	46.7534	9.01922	2.47208	3.64843	0.000263845	0.0106409	--	--	--	--	--	--	--	--	--	--	--	--	--	--
chr9_132311856_132296887_-14969	91.9255	0	45.9627	8.99469	2.51483	3.57666	0.000348009	0.0132627	hsa_circ_0089282	chr9	132296886	132311856	-	14970	675	K562, Gm12878, Sknshra	--	ANNOTATED, CDS, coding, INTERNAL, OVCODE, OVEXON	NM_015046	SETX	Salzman2013	http://www.circbase.org/cgi-bin/singlerecord.cgi?id=hsa_circ_0089282
chr5_87353235_87331348_-21887	90.057	0	45.0285	8.96497	2.1447	4.18006	2.91428e-05	0.00140767	hsa_circ_0004317	chr5	87331347	87353235	+	21888	793	Hs68_RNase, Hs68_control, K562, Helas3, Gm12878, Nhek, Sknshra	None	ANNOTATED, CDS, coding, INTERNAL, OVCODE, OVEXON	NM_002890	RASA1	Jeck2013, Salzman2013	http://www.circbase.org/cgi-bin/singlerecord.cgi?id=hsa_circ_0004317
chr10_68470163_68459104_-11059	89.425	0	44.7125	8.95454	2.46842	3.62764	0.000286024	0.0112089	hsa_circ_0009172	chr10	68459103	68470163	-	11060	645	Hs68_RNase, Hs68_control, K562, Hepg2, H1hesc, Gm12878, Ag04450, A549, Sknshra	None	ANNOTATED, CDS, coding, INTERNAL, OVCODE, OVEXON	NM_001080449	DNA2	Jeck2013, Salzman2013	http://www.circbase.org/cgi-bin/singlerecord.cgi?id=hsa_circ_0009172
chr1_77815231_77801331_-13900	89.0994	0	44.5497	8.94912	2.50872	3.56721	0.000360802	0.0136252	hsa_circ_0002570	chr1	77801330	77815231	+	13901	700	Hs68_RNase, Hs68_control, K562, Hepg2, Gm12878, Ag04450, Sknshra	None	ANNOTATED, CDS, coding, INTERNAL, OVCODE, OVEXON	NM_198549	FAM73A	Jeck2013, Salzman2013	http://www.circbase.org/cgi-bin/singlerecord.cgi?id=hsa_circ_0002570
chr14_30956242_30929201_-27041	88.7959	0	44.398	8.94469	2.11242	4.23434	2.29222e-05	0.00112022	--	--	--	--	--	--	--	--	--	--	--	--	--	--
chr7_152358675_152309966_-48709	87.5385	0	43.7693	8.92395	2.80637	3.1799	0.00147328	0.0349714	hsa_circ_0007017	chr7	152309965	152358675	-	48710	688	Hs68_RNase, Hs68_control	None	ANNOTATED, CDS, coding, INTERNAL, OVCODE, OVEXON	NM_170606	MLL3	Jeck2013	http://www.circbase.org/cgi-bin/singlerecord.cgi?id=hsa_circ_0007017
chr4_119553746_119538960_-14786	86.6295	0	43.3148	8.90889	2.14199	4.15917	3.19406e-05	0.00152507	--	--	--	--	--	--	--	--	--	--	--	--	--	--
chr5_88823927_88804598_-19329	83.4735	0	41.7367	8.85509	2.13563	4.14635	3.37816e-05	0.00159464	--	--	--	--	--	--	--	--	--	--	--	--	--	--
chr10_11527567_11509595_-17972	82.1247	0	41.0624	8.83184	2.16713	4.07535	4.59442e-05	0.00214441	hsa_circ_0017688	chr10	11509594	11527567	-	17973	272	K562	--	ANNOTATED, CDS, coding, INTERNAL, OVCODE, OVEXON	NM_014688	USP6NL	Salzman2013	http://www.circbase.org/cgi-bin/singlerecord.cgi?id=hsa_circ_0017688
chr2_23977075_23958301_-18774	78.2703	0	39.1352	8.76287	2.46647	3.55279	0.000381165	0.0141854	hsa_circ_0005970	chr2	23958300	23977075	+	18775	301	Hs68_RNase, Hs68_control, K562	None	ANNOTATED, CDS, coding, INTERNAL, OVCODE, OVEXON, UTR5	NM_181713	UBXN2A	Jeck2013, Salzman2013	http://www.circbase.org/cgi-bin/singlerecord.cgi?id=hsa_circ_0005970
chr12_106843947_106842589_-1358	77.8903	0	38.9451	8.75542	2.18759	4.00232	6.27256e-05	0.00289514	hsa_circ_0002154	chr12	106842588	106843947	+	1359	325	Hs68_RNase, Hs68_control	None	ANNOTATED, CDS, coding, INTERNAL, OVCODE, OVEXON	NM_018157	RIC8B	Jeck2013	http://www.circbase.org/cgi-bin/singlerecord.cgi?id=hsa_circ_0002154
chr1_100442996_100424222_-18774	77.3643	0	38.6821	8.74532	2.82042	3.10072	0.00193053	0.0431152	hsa_circ_0000097	chr1	100424221	100442996	+	18775	210	neutr, K562, Ag04450	None	ANNOTATED, CDS, coding, INTERNAL	NM_033312	CDC14A	Memczak2013, Salzman2013	http://www.circbase.org/cgi-bin/singlerecord.cgi?id=hsa_circ_0000097
chr7_26854890_26844030_-10860	77.1198	0	38.5599	8.7416	2.47497	3.53201	0.000412421	0.0147689	--	--	--	--	--	--	--	--	--	--	--	--	--	--
chr6_35642843_35619096_-23747	77.0833	0	38.5416	8.74013	2.50221	3.49296	0.00047769	0.0162649	hsa_circ_0001599	chr6	35619095	35642843	-	23748	527	cd_19, Hs68_RNase, Hs68_control, K562, H1hesc, Gm12878	None	ANNOTATED, CDS, coding, INTERNAL, OVCODE, OVEXON, UTR5	NM_001145776	FKBP5	Jeck2013, Memczak2013, Salzman2013	http://www.circbase.org/cgi-bin/singlerecord.cgi?id=hsa_circ_0001599
chr15_64123546_64118117_-5429	75.2134	0	37.6067	8.70527	2.51478	3.46164	0.000536896	0.0178421	hsa_circ_0035818	chr15	64118116	64123546	+	5430	239	Nhek, K562, Hepg2, Helas3, Gm12878, Ag04450, A549, Sknshra	--	ANNOTATED, CDS, coding, INTERNAL, OVCODE, OVEXON	NM_003099	SNX1	Salzman2013	http://www.circbase.org/cgi-bin/singlerecord.cgi?id=hsa_circ_0035818
chr22_50389111_50372020_-17091	73.7126	0	36.8563	8.67607	2.80065	3.09787	0.00194916	0.0432985	--	--	--	--	--	--	--	--	--	--	--	--	--	--
chr6_6182141_6151813_-30328	73.1982	0	36.5991	8.666	2.46905	3.50984	0.000448369	0.0153928	--	--	--	--	--	--	--	--	--	--	--	--	--	--
chr2_144430026_144424796_-5230	72.3012	0	36.1506	8.64809	2.50248	3.45581	0.000548644	0.0180878	hsa_circ_0056666	chr2	144424795	144430026	-	5231	330	K562, Sknshra	--	ANNOTATED, CDS, coding, INTERNAL, OVCODE, OVERLAPTX, OVEXON	NM_014795	ZEB2	Salzman2013	http://www.circbase.org/cgi-bin/singlerecord.cgi?id=hsa_circ_0056666
chr17_42501304_42500707_-597	71.7481	0	35.8741	8.63723	2.44706	3.52964	0.000416123	0.0147742	hsa_circ_0008179	chr17	42500706	42501304	+	598	325	Hs68_RNase, Hs68_control, Nhek, K562, Huvec, Hepg2, Helas3, H1hesc, Gm12878, Bj, Ag04450, A549, Nhlf, Sknshra	None	ANNOTATED, CDS, coding, INTERNAL, OVCODE, OVEXON	NM_001130020	ATP6V0A1	Jeck2013, Salzman2013	http://www.circbase.org/cgi-bin/singlerecord.cgi?id=hsa_circ_0008179
chr9_97350555_97347314_-3241	71.1567	0	35.5784	8.62493	2.80187	3.07827	0.00208204	0.0452817	hsa_circ_0087659	chr9	97347313	97350555	+	3242	504	Gm12878, Ag04450	--	ANNOTATED, INTERNAL, ncRNA, OVCODE, OVEXON	NR_036528	BDAG1	Salzman2013	http://www.circbase.org/cgi-bin/singlerecord.cgi?id=hsa_circ_0087659
chr13_98482321_98474821_-7500	69.0615	0	34.5308	8.58244	2.50688	3.42356	0.000618066	0.0195476	hsa_circ_0030707	chr13	98474820	98482321	-	7501	324	K562, Huvec, Helas3, H1hesc, Gm12878, Bj, Ag04450	--	ANNOTATED, CDS, coding, INTERNAL, OVCODE, OVEXON	NM_001032296	STK24	Salzman2013	http://www.circbase.org/cgi-bin/singlerecord.cgi?id=hsa_circ_0030707
chr6_160048543_160046498_-2045	69.0148	0	34.5074	8.58096	2.49055	3.44541	0.000570198	0.0185047	--	--	--	--	--	--	--	--	--	--	--	--	--	--
chr14_49800696_49795791_-4905	68.5193	0	34.2597	8.57071	2.78896	3.07308	0.00211859	0.0458366	--	--	--	--	--	--	--	--	--	--	--	--	--	--
chr10_120890009_120880826_-9183	68.294	0	34.147	8.56527	2.57466	3.32675	0.00087864	0.0257033	--	--	--	--	--	--	--	--	--	--	--	--	--	--
chr1_235801097_235800320_-777	67.0017	0	33.5009	8.53883	2.80229	3.04709	0.00231068	0.0479929	hsa_circ_0017092	chr1	235800319	235801097	-	778	294	Nhek	--	ANNOTATED, CDS, coding, INTERNAL, OVCODE, OVEXON	NM_000081	LYST	Salzman2013	http://www.circbase.org/cgi-bin/singlerecord.cgi?id=hsa_circ_0017092
chr13_21168399_21161790_-6609	66.8524	0	33.4262	8.53487	2.80242	3.04554	0.00232266	0.0480016	hsa_circ_0004966	chr13	21161789	21168399	-	6610	498	Hs68_RNase, Hs68_control	None	ANNOTATED, CDS, coding, INTERNAL, OVCODE, OVEXON	NM_145061	SKA3	Jeck2013	http://www.circbase.org/cgi-bin/singlerecord.cgi?id=hsa_circ_0004966
chr5_177204292_177191884_-12408	66.337	0	33.1685	8.52422	2.45107	3.47776	0.000505627	0.0170762	hsa_circ_0075157	chr5	177191883	177204292	+	12409	309	K562	--	ANNOTATED, CDS, coding, INTERNAL, OVCODE, OVEXON	NM_022455	NSD1	Salzman2013	http://www.circbase.org/cgi-bin/singlerecord.cgi?id=hsa_circ_0075157
chr14_49743806_49709157_-34649	65.7681	0	32.8841	8.51112	2.47526	3.43848	0.000584998	0.0186929	--	--	--	--	--	--	--	--	--	--	--	--	--	--
chr5_88823930_88804598_-19332	65.1867	0	32.5934	8.49923	2.5381	3.34866	0.00081204	0.0239235	--	--	--	--	--	--	--	--	--	--	--	--	--	--
chr6_161034449_161022010_-12439	64.1114	0	32.0557	8.47475	2.79414	3.03304	0.00242104	0.0490585	--	--	--	--	--	--	--	--	--	--	--	--	--	--
chr18_76871825_76849526_-22299	63.8046	0	31.9023	8.46808	2.4624	3.43895	0.000583966	0.0186929	hsa_circ_0001993	chr18	76849525	76871825	+	22300	612	Hs68_RNase, Hs68_control, K562, Gm12878, Ag04450, A549	None	ANNOTATED, CDS, coding, INTERNAL, OVCODE, OVEXON	NM_007345	ZNF236	Jeck2013, Salzman2013	http://www.circbase.org/cgi-bin/singlerecord.cgi?id=hsa_circ_0001993
chr16_14644609_14644274_-335	62.0578	0	31.0289	8.42821	2.48529	3.39123	0.000695793	0.0217318	hsa_circ_0009065	chr16	14644273	14644609	+	336	336	Hs68_RNase, Hs68_control, Nhek, K562, Hepg2, Helas3, H1hesc, Gm12878, Bj, Ag04450, Sknshra	None	ANNOTATED, CDS, coding, INTERNAL, OVCODE, OVEXON, UTR5	NM_016561	BFAR	Jeck2013, Salzman2013	http://www.circbase.org/cgi-bin/singlerecord.cgi?id=hsa_circ_0009065
chr1_21050994_21001199_-49795	61.7252	0	30.8626	8.41936	2.19256	3.83996	0.000123053	0.00549638	hsa_circ_0005254	chr1	21001198	21050994	-	49796	1739	Hs68_RNase, Hs68_control	None	ALT_DONOR, CDS, coding, INTERNAL, intronic, OVCODE, OVEXON, UTR5	NM_001198801	EIF4G3	Jeck2013	http://www.circbase.org/cgi-bin/singlerecord.cgi?id=hsa_circ_0005254
chr4_53389873_53383773_-6100	61.6013	0	30.8007	8.41734	2.16079	3.89548	9.80032e-05	0.00442506	hsa_circ_0001411	chr4	53383772	53389873	+	6101	169	cd_19, cd_34, Hs68_RNase, Hs68_control, K562, Gm12878, Bj, Ag04450, Nhek, Sknshra	None	ANNOTATED, CDS, coding, INTERNAL, OVCODE, OVEXON	NM_001134937	FIP1L1	Jeck2013, Memczak2013, Salzman2013	http://www.circbase.org/cgi-bin/singlerecord.cgi?id=hsa_circ_0001411
chr1_164482547_164475148_-7399	61.1183	0	30.5591	8.40541	2.48093	3.388	0.000704032	0.021825	--	--	--	--	--	--	--	--	--	--	--	--	--	--
chr7_139409654_139398599_-11055	61.1131	0	30.5566	8.40512	2.48664	3.38011	0.000724577	0.0221316	--	--	--	--	--	--	--	--	--	--	--	--	--	--
chr4_88065879_88065374_-505	60.9824	0	30.4912	8.40331	2.54484	3.30209	0.000959659	0.0269353	hsa_circ_0006133	chr4	88065373	88065879	+	506	240	Hs68_RNase, Hs68_control	None	ANNOTATED, CDS, coding, INTERNAL, OVCODE, OVEXON	NM_000297	PKD2	Jeck2013	http://www.circbase.org/cgi-bin/singlerecord.cgi?id=hsa_circ_0006133
chr4_169556095_169507037_-49058	60.0997	0	30.0498	8.38113	2.47759	3.38277	0.000717586	0.0220804	--	--	--	--	--	--	--	--	--	--	--	--	--	--
chr9_77260224_77247259_-12965	58.0809	0	29.0405	8.33256	2.53019	3.29325	0.000990347	0.0272444	--	--	--	--	--	--	--	--	--	--	--	--	--	--
chr1_172308839_172253573_-55266	57.9301	0	28.965	8.32887	2.47927	3.35941	0.000781103	0.0233432	--	--	--	--	--	--	--	--	--	--	--	--	--	--
chr2_32678922_32630523_-48399	57.539	0	28.7695	8.31922	2.46757	3.37142	0.000747814	0.0226746	hsa_circ_0053862	chr2	32630522	32678922	+	48400	1031	K562, Sknshra	--	ANNOTATED, CDS, coding, INTERNAL, OVCODE, OVEXON	NM_017735	TTC27	Salzman2013	http://www.circbase.org/cgi-bin/singlerecord.cgi?id=hsa_circ_0053862
chr20_47633636_47623911_-9725	57.1258	0	28.5629	8.30759	2.19297	3.78829	0.000151689	0.0066328	hsa_circ_0001165	chr20	47623910	47633636	+	9726	881	cd_19, Nhek, K562, Helas3, H1hesc, Gm12878, Bj, Ag04450, A549, Sknshra, Mcf7	None	ANNOTATED, CDS, coding, INTERNAL	NM_181659	NCOA3	Memczak2013, Salzman2013	http://www.circbase.org/cgi-bin/singlerecord.cgi?id=hsa_circ_0001165
chr15_58917020_58912563_-4457	55.8295	0	27.9148	8.27531	2.4619	3.36135	0.000775629	0.0233432	--	--	--	--	--	--	--	--	--	--	--	--	--	--
chr14_69149503_69122217_-27286	55.3595	0	27.6798	8.26226	2.27152	3.63733	0.000275482	0.0110034	--	--	--	--	--	--	--	--	--	--	--	--	--	--
chr16_89317078_89305206_-11872	54.6653	0	27.3327	8.24577	2.32456	3.54724	0.000389295	0.0141854	hsa_circ_0040929	chr16	89305205	89317078	-	11873	285	Huvec, Hepg2, Bj	--	ANNOTATED, CDS, coding, INTERNAL, OVCODE, OVEXON, UTR5	NM_013275	ANKRD11	Salzman2013	http://www.circbase.org/cgi-bin/singlerecord.cgi?id=hsa_circ_0040929
chr9_83683066_83678441_-4625	54.3505	0	27.1753	8.23608	2.49874	3.29609	0.000980409	0.0271508	hsa_circ_0001866	chr9	83678440	83683066	-	4626	538	cd_19, neutr, Hs68_RNase, Hs68_control, K562, H1hesc, Gm12878, Bj, Ag04450, A549, Nhek, Sknshra	None	ANNOTATED, CDS, coding, INTERNAL, OVCODE, OVEXON	NM_013438	UBQLN1	Jeck2013, Memczak2013, Salzman2013	http://www.circbase.org/cgi-bin/singlerecord.cgi?id=hsa_circ_0001866
chr1_186419077_186406083_-12994	53.4266	0	26.7133	8.2114	2.48193	3.30848	0.000938041	0.0268402	hsa_circ_0000166	chr1	186406082	186419077	+	12995	366	cd_19, Hs68_RNase, Hs68_control	None	ALT_DONOR, CDS, coding, INTERNAL, OVCODE, OVERLAPTX, OVEXON, UTR3	NM_001164245	C1orf27	Jeck2013, Memczak2013	http://www.circbase.org/cgi-bin/singlerecord.cgi?id=hsa_circ_0000166
chr2_112089718_112074912_-14806	53.0074	0	26.5037	8.19995	2.14881	3.81605	0.000135606	0.00599264	--	--	--	--	--	--	--	--	--	--	--	--	--	--
chr3_63913225_63912588_-637	52.9717	0	26.4859	8.19966	2.47552	3.3123	0.000925339	0.0266935	hsa_circ_0007761	chr3	63912587	63913225	+	638	405	Hs68_RNase, Hs68_control, Nhek, K562, Huvec, Hepg2, Helas3, H1hesc, Gm12878, Bj, Ag04450, A549, Sknshra, Mcf7	None	ANNOTATED, CDS, coding, INTERNAL, OVCODE, OVEXON, UTR5	NM_000333	ATXN7	Jeck2013, Salzman2013	http://www.circbase.org/cgi-bin/singlerecord.cgi?id=hsa_circ_0007761
chr12_106851594_106842589_-9005	52.9187	0	26.4594	8.19717	2.54975	3.21489	0.00130493	0.032075	hsa_circ_0006512	chr12	106842588	106851594	+	9006	470	Hs68_RNase, Hs68_control, K562, Gm12878	None	ANNOTATED, CDS, coding, INTERNAL, OVCODE, OVEXON	NM_018157	RIC8B	Jeck2013, Salzman2013	http://www.circbase.org/cgi-bin/singlerecord.cgi?id=hsa_circ_0006512
chr12_26725765_26711173_-14592	52.7077	0	26.3538	8.19286	2.49904	3.2784	0.00104398	0.0285308	--	--	--	--	--	--	--	--	--	--	--	--	--	--
chr4_150817257_150735258_-81999	52.6955	0	26.3478	8.1911	2.60419	3.14536	0.00165885	0.037655	hsa_circ_0071175	chr4	150735257	150817257	-	82000	583	Gm12878	--	ANNOTATED, CDS, coding, INTERNAL, OVCODE, OVERLAPTX, OVEXON	NM_001199282	LRBA	Salzman2013	http://www.circbase.org/cgi-bin/singlerecord.cgi?id=hsa_circ_0071175
chr4_169537911_169507037_-30874	52.6082	0	26.3041	8.19009	2.47743	3.30588	0.00094679	0.0268402	--	--	--	--	--	--	--	--	--	--	--	--	--	--
chr7_103029418_103025063_-4355	52.4662	0	26.2331	8.18511	2.48052	3.29976	0.00096767	0.0269778	hsa_circ_0007375	chr7	103025062	103029418	-	4356	495	Hs68_RNase, Hs68_control	None	ANNOTATED, CDS, coding, INTERNAL, OVCODE, OVEXON	NM_145032	FBXL13	Jeck2013	http://www.circbase.org/cgi-bin/singlerecord.cgi?id=hsa_circ_0007375
chr3_3175269_3167634_-7635	52.0495	0	26.0247	8.17357	2.4731	3.30499	0.000949811	0.0268402	--	--	--	--	--	--	--	--	--	--	--	--	--	--
chr11_34092056_34086064_-5992	51.2523	0	25.6261	8.15161	2.49919	3.2617	0.00110746	0.0298726	hsa_circ_0000287	chr11	34086063	34092056	+	5993	739	cd_34, K562, Hepg2	None	ANNOTATED, CDS, coding, INTERNAL	NM_005898	CAPRIN1	Memczak2013, Salzman2013	http://www.circbase.org/cgi-bin/singlerecord.cgi?id=hsa_circ_0000287
chr3_179204588_179203544_-1044	50.7478	0	25.3739	8.13813	2.50303	3.2513	0.00114877	0.030787	--	--	--	--	--	--	--	--	--	--	--	--	--	--
chr1_213117410_213077696_-39714	49.697	0	24.8485	8.107	2.47895	3.27033	0.00107421	0.029165	hsa_circ_0004849	chr1	213077695	213117410	+	39715	331	Hs68_RNase, Hs68_control, K562, Ag04450, A549	None	ANNOTATED, CDS, coding, INTERNAL, OVCODE, OVEXON	NM_012424	RPS6KC1	Jeck2013, Salzman2013	http://www.circbase.org/cgi-bin/singlerecord.cgi?id=hsa_circ_0004849
chr1_88760376_88740988_-19388	49.4382	0	24.7191	8.1002	2.50951	3.2278	0.00124748	0.0319551	hsa_circ_0013092	chr1	88740987	88760376	+	19389	456	Gm12878	--	ANNOTATED, CDS, coding, INTERNAL, OVCODE, OVEXON	NM_006256	PKN2	Salzman2013	http://www.circbase.org/cgi-bin/singlerecord.cgi?id=hsa_circ_0013092
chr6_79493750_79489084_-4666	48.8115	0	24.4058	8.08076	2.49816	3.23468	0.00121779	0.0318157	--	--	--	--	--	--	--	--	--	--	--	--	--	--
chr5_140445975_140440119_-5856	107.463	0.317326	53.89	8.07019	2.06323	3.91144	9.17486e-05	0.00418817	hsa_circ_0001540	chr5	140440118	140445975	+	5857	530	HEK293, cd_19, Hs68_RNase, Hs68_control, K562, H1hesc, Gm12878, Bj, Ag04450, Nhek, Sknshra	None	ANNOTATED, CDS, coding, INTERNAL, OVCODE, OVEXON	NM_017747	ANKHD1	Jeck2013, Memczak2013, Salzman2013	http://www.circbase.org/cgi-bin/singlerecord.cgi?id=hsa_circ_0001540
chr5_172935310_172932436_-2874	47.7498	0	23.8749	8.04915	2.49914	3.22077	0.00127848	0.0319551	hsa_circ_0004004	chr5	172932435	172935310	+	2875	224	Hs68_RNase, Hs68_control, K562, Huvec, Hepg2, Helas3, H1hesc, Gm12878, Bj, Ag04450, A549, Nhek	None	ANNOTATED, CDS, coding, INTERNAL, OVCODE, OVEXON	NM_001031711	ERGIC1	Jeck2013, Salzman2013	http://www.circbase.org/cgi-bin/singlerecord.cgi?id=hsa_circ_0004004
chr8_17972687_17972329_-358	46.5781	0	23.2891	8.01361	2.52351	3.17558	0.00149538	0.0352944	--	--	--	--	--	--	--	--	--	--	--	--	--	--
chr13_49483563_49480219_-3344	46.4252	0	23.2126	8.0085	2.17127	3.6884	0.00022567	0.00946903	hsa_circ_0000483	chr13	49480218	49483563	+	3345	613	cd_19	None	ANNOTATED, CDS, coding, INTERNAL	NM_001160308	SETDB2	Memczak2013	http://www.circbase.org/cgi-bin/singlerecord.cgi?id=hsa_circ_0000483
chr9_112102285_112078538_-23747	46.0378	0	23.0189	7.99776	2.48291	3.22112	0.00127692	0.0319551	--	--	--	--	--	--	--	--	--	--	--	--	--	--
chr10_11852215_11851997_-218	45.9628	0	22.9814	7.99488	2.46616	3.24183	0.00118765	0.0314236	--	--	--	--	--	--	--	--	--	--	--	--	--	--
chr18_69896045_69873144_-22901	45.9325	0	22.9662	7.99367	2.47479	3.23004	0.00123774	0.0319551	hsa_circ_0047920	chr18	69873143	69896045	-	22902	448	Gm12878	--	ANNOTATED, CDS, coding, INTERNAL, OVCODE, OVEXON	NM_006566	CD226	Salzman2013	http://www.circbase.org/cgi-bin/singlerecord.cgi?id=hsa_circ_0047920
chr12_111683307_111679151_-4156	45.4723	0	22.7361	7.97895	2.20367	3.62076	0.000293744	0.0114038	hsa_circ_0006396	chr12	111679150	111683307	-	4157	551	Hs68_RNase, Hs68_control, K562, H1hesc, Gm12878, Bj, Ag04450, Sknshra	None	ANNOTATED, CDS, coding, INTERNAL, OVCODE, OVEXON	NM_006768	BRAP	Jeck2013, Salzman2013	http://www.circbase.org/cgi-bin/singlerecord.cgi?id=hsa_circ_0006396
chr7_77778446_77765495_-12951	44.4942	0	22.2471	7.9484	2.46967	3.21841	0.00128905	0.0319551	hsa_circ_0080865	chr7	77765494	77778446	+	12952	558	K562	--	ANNOTATED, CDS, coding, INTERNAL, OVCODE, OVEXON	NM_198467	RSBN1L	Salzman2013	http://www.circbase.org/cgi-bin/singlerecord.cgi?id=hsa_circ_0080865
chr1_9936627_9931891_-4736	44.1315	0	22.0658	7.93623	2.50669	3.16602	0.00154542	0.0360657	--	--	--	--	--	--	--	--	--	--	--	--	--	--
chr9_99928843_99915178_-13665	43.5656	0	21.7828	7.91724	2.46578	3.21085	0.00132345	0.0323388	hsa_circ_0004825	chr9	99915177	99928843	+	13666	251	Hs68_RNase, Hs68_control, K562, Ag04450, Nhek	None	ANNOTATED, CDS, coding, INTERNAL, OVCODE, OVEXON, UTR5	NM_017919	STX17	Jeck2013, Salzman2013	http://www.circbase.org/cgi-bin/singlerecord.cgi?id=hsa_circ_0004825
chr7_74718944_74705162_-13782	42.9598	0	21.4799	7.89725	2.50586	3.15152	0.00162424	0.037655	--	--	--	--	--	--	--	--	--	--	--	--	--	--
chr12_123315660_123313620_-2040	42.9332	0	21.4666	7.89643	2.47073	3.19599	0.00139354	0.033461	hsa_circ_0005310	chr12	123313619	123315660	-	2041	285	Hs68_RNase, Hs68_control, K562, Huvec	None	ANNOTATED, CDS, coding, INTERNAL, OVCODE, OVEXON	NM_001167856	SBNO1	Jeck2013, Salzman2013	http://www.circbase.org/cgi-bin/singlerecord.cgi?id=hsa_circ_0005310
chr3_113506605_113488945_-17660	42.7124	0	21.3562	7.888	2.51023	3.14235	0.00167599	0.0378374	hsa_circ_0006163	chr3	113488944	113506605	-	17661	611	Hs68_RNase, Hs68_control, K562, H1hesc, Gm12878, Ag04450, A549, Sknshra	None	ANNOTATED, CDS, coding, INTERNAL, OVCODE, OVEXON	NM_144718	SPICE1	Jeck2013, Salzman2013	http://www.circbase.org/cgi-bin/singlerecord.cgi?id=hsa_circ_0006163
chr4_150817257_150806271_-10986	42.5482	0	21.2741	7.88274	2.50399	3.14807	0.00164351	0.037655	hsa_circ_0071197	chr4	150806270	150817257	-	10987	347	K562, H1hesc, Bj	--	ANNOTATED, CDS, coding, INTERNAL, OVCODE, OVEXON	NM_001199282	LRBA	Salzman2013	http://www.circbase.org/cgi-bin/singlerecord.cgi?id=hsa_circ_0071197
chr3_32545965_32534511_-11454	42.1281	0	21.0641	7.86922	2.4597	3.19925	0.00137784	0.0332763	--	--	--	--	--	--	--	--	--	--	--	--	--	--
chr9_83686155_83677727_-8428	41.9072	0	20.9536	7.86175	2.22395	3.53503	0.000407723	0.0147277	hsa_circ_0003715	chr9	83677726	83686155	-	8429	925	Hs68_RNase, Hs68_control, K562, Huvec, Hepg2, Helas3, H1hesc, Gm12878, Bj, Ag04450, A549, Nhek, Sknshra, Mcf7	None	ANNOTATED, CDS, coding, INTERNAL, OVCODE, OVEXON	NM_013438	UBQLN1	Jeck2013, Salzman2013	http://www.circbase.org/cgi-bin/singlerecord.cgi?id=hsa_circ_0003715
chr21_33432871_33421480_-11391	41.1174	0	20.5587	7.83301	2.20682	3.54946	0.000386027	0.0141854	hsa_circ_0002113	chr21	33421479	33432871	+	11392	673	Hs68_RNase, Hs68_control, Nhek, Hepg2, Helas3, H1hesc, Gm12878, Bj, Ag04450, A549, Sknshra, Mcf7	None	ANNOTATED, CDS, coding, INTERNAL, OVCODE, OVERLAPTX, OVEXON	NM_005534	IFNGR2	Jeck2013, Salzman2013	http://www.circbase.org/cgi-bin/singlerecord.cgi?id=hsa_circ_0002113
chr12_71644318_71642436_-1882	41.0728	0	20.5364	7.83185	2.53205	3.09308	0.00198089	0.0435834	--	--	--	--	--	--	--	--	--	--	--	--	--	--
chr12_28452654_28391304_-61350	39.8029	0	19.9014	7.78719	2.21147	3.52128	0.000429475	0.0150424	--	--	--	--	--	--	--	--	--	--	--	--	--	--
chr4_42524847_42485496_-39351	39.7902	0	19.8951	7.78583	2.1743	3.58084	0.000342492	0.0131733	hsa_circ_0069608	chr4	42485495	42524847	-	39352	602	Gm12878	--	ANNOTATED, CDS, coding, INTERNAL, OVCODE, OVEXON	NM_006095	ATP8A1	Salzman2013	http://www.circbase.org/cgi-bin/singlerecord.cgi?id=hsa_circ_0069608
chr16_89762022_89758577_-3445	39.365	0	19.6825	7.7714	2.46978	3.14659	0.00165187	0.037655	hsa_circ_0002766	chr16	89758576	89762022	-	3446	203	Hs68_RNase, Hs68_control, Nhek, K562, Huvec, Hepg2, Helas3, H1hesc, Gm12878, Bj, Ag04450, A549, Sknshra	None	ANNOTATED, CDS, coding, INTERNAL, OVCODE, OVEXON	NM_000135	FANCA	Jeck2013, Salzman2013	http://www.circbase.org/cgi-bin/singlerecord.cgi?id=hsa_circ_0002766
chr9_125935607_125929655_-5952	39.2545	0	19.6272	7.7667	2.4908	3.11816	0.00181982	0.0408624	hsa_circ_0004804	chr9	125929654	125935607	+	5953	327	Hs68_RNase, Hs68_control	None	ANNOTATED, CDS, coding, INTERNAL, OVCODE, OVEXON	NM_006195	PBX3	Jeck2013	http://www.circbase.org/cgi-bin/singlerecord.cgi?id=hsa_circ_0004804
chr1_77926892_77925188_-1704	38.882	0	19.441	7.75412	2.55856	3.03066	0.00244019	0.0492066	--	--	--	--	--	--	--	--	--	--	--	--	--	--
chr14_101906529_101901719_-4810	38.2754	0	19.1377	7.73058	2.19681	3.519	0.00043317	0.0150424	hsa_circ_0003831	chr14	101901718	101906529	+	4811	299	Hs68_RNase, Hs68_control, K562, Hepg2, Gm12878, Bj, Ag04450, A549, Sknshra	None	ANNOTATED, CDS, coding, INTERNAL, OVCODE, OVEXON	NM_001161725	PPP2R5C	Jeck2013, Salzman2013	http://www.circbase.org/cgi-bin/singlerecord.cgi?id=hsa_circ_0003831
chr9_107306647_107300141_-6506	38.203	0	19.1015	7.72747	2.52309	3.0627	0.00219348	0.0465783	hsa_circ_0087855	chr9	107300140	107306647	+	6507	431	K562, Helas3, H1hesc, Gm12878, Bj, Ag04450, A549, Nhek, Sknshra, Mcf7	--	ANNOTATED, CDS, coding, INTERNAL, OVCODE, OVERLAPTX, OVEXON	NM_002874	RAD23B	Salzman2013	http://www.circbase.org/cgi-bin/singlerecord.cgi?id=hsa_circ_0087855
chr1_40202614_40189055_-13559	37.8783	0	18.9392	7.71504	2.52221	3.05884	0.00222199	0.0468535	hsa_circ_0006373	chr1	40189054	40202614	+	13560	573	Hs68_RNase, Hs68_control	None	ANNOTATED, CDS, coding, INTERNAL, OVCODE, OVEXON	NM_012421	RLF	Jeck2013	http://www.circbase.org/cgi-bin/singlerecord.cgi?id=hsa_circ_0006373
chr1_62447511_62444738_-2773	37.6529	0	18.8264	7.70676	2.49742	3.08589	0.00202943	0.0443698	--	--	--	--	--	--	--	--	--	--	--	--	--	--
chr10_16734064_16695023_-39041	37.1095	0	18.5547	7.68712	2.5307	3.03755	0.00238513	0.048807	--	--	--	--	--	--	--	--	--	--	--	--	--	--
chr5_66054951_66043077_-11874	36.0427	0	18.0214	7.64427	2.49619	3.06238	0.00219587	0.0465783	--	--	--	--	--	--	--	--	--	--	--	--	--	--
chr5_94873241_94868333_-4908	36.0086	0	18.0043	7.64237	2.49578	3.06212	0.00219772	0.0465783	--	--	--	--	--	--	--	--	--	--	--	--	--	--
chr1_155370983_155370504_-479	35.907	0	17.9535	7.63851	2.4698	3.09277	0.00198297	0.0435834	hsa_circ_0007608	chr1	155370503	155370983	-	480	354	Hs68_RNase, Hs68_control, K562, Gm12878, Bj, Sknshra	None	ANNOTATED, CDS, coding, INTERNAL, OVCODE, OVEXON	NM_018489	ASH1L	Jeck2013, Salzman2013	http://www.circbase.org/cgi-bin/singlerecord.cgi?id=hsa_circ_0007608
chr5_109100519_109037422_-63097	35.8832	0	17.9416	7.63641	2.51552	3.03572	0.00239961	0.0488627	hsa_circ_0073529	chr5	109037421	109100519	+	63098	392	Ag04450, Nhek	--	ANNOTATED, CDS, coding, INTERNAL, OVCODE, OVERLAPTX, OVEXON	NM_005246	FER	Salzman2013	http://www.circbase.org/cgi-bin/singlerecord.cgi?id=hsa_circ_0073529
chr20_2965202_2923207_-41995	35.3099	0	17.655	7.61363	2.49549	3.05096	0.00228111	0.0477509	hsa_circ_0001126	chr20	2923206	2965202	+	41996	633	cd_19, Hs68_RNase, Hs68_control	None	ANNOTATED, CDS, coding, OVCODE, OVEXON, UTR5	NM_080841	PTPRA	Jeck2013, Memczak2013	http://www.circbase.org/cgi-bin/singlerecord.cgi?id=hsa_circ_0001126
chr10_96907747_96858292_-49455	34.9443	0	17.4721	7.59941	2.4751	3.07035	0.00213809	0.0460188	hsa_circ_0006198	chr10	96858291	96907747	+	49456	49119	Hs68_RNase, Hs68_control	None	ALT_ACCEPTOR, coding, INTERNAL, intronic, OVEXON, UTR5	NM_032440	LCOR	Jeck2013	http://www.circbase.org/cgi-bin/singlerecord.cgi?id=hsa_circ_0006198
chr5_179710065_179705679_-4386	33.9386	0	16.9693	7.55667	2.49726	3.02599	0.00247821	0.0497319	hsa_circ_0001564	chr5	179705678	179710065	+	4387	724	cd_34, Hs68_RNase, Hs68_control, K562, Helas3, H1hesc, Gm12878	LINE	ANNOTATED, CDS, coding, INTERNAL, OVCODE, OVEXON, UTR5	NM_001024649	CANX	Jeck2013, Memczak2013, Salzman2013	http://www.circbase.org/cgi-bin/singlerecord.cgi?id=hsa_circ_0001564
chr1_236816543_236806144_-10399	33.016	0	16.508	7.51783	2.47286	3.04013	0.00236473	0.0486292	hsa_circ_0004039	chr1	236806143	236816543	+	10400	515	Hs68_RNase, Hs68_control, Nhek, K562, Hepg2, Gm12878, Ag04450, Mcf7	None	ANNOTATED, CDS, coding, INTERNAL, OVCODE, OVEXON	NM_000254	MTR	Jeck2013, Salzman2013	http://www.circbase.org/cgi-bin/singlerecord.cgi?id=hsa_circ_0004039
chr2_68188690_68186468_-2222	32.8195	0	16.4097	7.50877	2.17644	3.45002	0.00056054	0.0183345	--	--	--	--	--	--	--	--	--	--	--	--	--	--
chrx_123614189_123610918_-3271	102.028	0.648378	51.3379	7.24604	2.37566	3.05011	0.00228754	0.0477509	--	--	--	--	--	--	--	--	--	--	--	--	--	--
chr1_186894211_186893011_-1200	86.7261	0.951978	43.839	6.45648	2.03454	3.17343	0.00150651	0.0353561	--	--	--	--	--	--	--	--	--	--	--	--	--	--
chr5_154872651_154865192_-7459	0.374285	85.3326	42.8535	-7.83484	2.43084	-3.2231	0.00126813	0.0319551	hsa_circ_0074719	chr5	154865191	154872651	+	7460	612	K562	--	ANNOTATED, CDS, coding, INTERNAL, OVCODE, OVEXON	NM_004779	CNOT8	Salzman2013	http://www.circbase.org/cgi-bin/singlerecord.cgi?id=hsa_circ_0074719
chr16_10769194_10767949_-1245	0	66.1309	33.0655	-8.66542	2.46305	-3.51816	0.000434542	0.0150424	--	--	--	--	--	--	--	--	--	--	--	--	--	--
chr7_107283732_107281300_-2432	0	72.5286	36.2643	-8.79885	2.79588	-3.14708	0.0016491	0.037655	hsa_circ_0081891	chr7	107281299	107283732	-	2433	262	Nhek	--	ANNOTATED, CDS, coding, INTERNAL, OVCODE, OVEXON	NM_001161520	COG5	Salzman2013	http://www.circbase.org/cgi-bin/singlerecord.cgi?id=hsa_circ_0081891
chr6_17834071_17828240_-5831	0	77.2609	38.6305	-8.89011	2.79151	-3.18469	0.00144907	0.0345945	--	--	--	--	--	--	--	--	--	--	--	--	--	--
chr12_101790057_101786012_-4045	0	79.2387	39.6194	-8.9267	2.78321	-3.20734	0.0013397	0.0325446	hsa_circ_0004925	chr12	101786011	101790057	-	4046	368	Hs68_RNase, Hs68_control, Hepg2, Helas3, Gm12878	None	ANNOTATED, CDS, coding, INTERNAL, OVCODE, OVEXON	NM_024312	GNPTAB	Jeck2013, Salzman2013	http://www.circbase.org/cgi-bin/singlerecord.cgi?id=hsa_circ_0004925
chr5_157104749_157095306_-9443	0	86.4314	43.2157	-9.05178	2.80461	-3.22747	0.00124892	0.0319551	--	--	--	--	--	--	--	--	--	--	--	--	--	--
chr10_11952249_11942665_-9584	0	88.1754	44.0877	-9.08083	2.79937	-3.24388	0.00117914	0.0313985	--	--	--	--	--	--	--	--	--	--	--	--	--	--
chr6_73440445_73440209_-236	0	109.477	54.7386	-9.39292	2.80005	-3.35455	0.000794949	0.0235873	hsa_circ_0004092	chr6	73440208	73440445	-	237	237	Hs68_RNase, Hs68_control	None	ANNOTATED, CDS, coding, INTERNAL, OVCODE, OVEXON	NM_138441	MB21D1	Jeck2013	http://www.circbase.org/cgi-bin/singlerecord.cgi?id=hsa_circ_0004092
chr6_42605859_42603588_-2271	0	125.85	62.9248	-9.59397	2.80345	-3.4222	0.000621158	0.0195476	hsa_circ_0076361	chr6	42603587	42605859	+	2272	270	K562, Helas3, Nhek	--	ANNOTATED, CDS, coding, INTERNAL, OVCODE, OVEXON	NM_015255	UBR2	Salzman2013	http://www.circbase.org/cgi-bin/singlerecord.cgi?id=hsa_circ_0076361
chr7_131076587_131052425_-24162	0	44.6056	22.3028	-20.5553	3.02772	-6.78904	1.1288e-11	5.71831e-10	--	--	--	--	--	--	--	--	--	--	--	--	--	--
chr17_42839012_42838093_-919	0	48.8566	24.4283	-20.7644	3.02758	-6.85842	6.96269e-12	3.57074e-10	--	--	--	--	--	--	--	--	--	--	--	--	--	--
chr2_42304551_42286269_-18282	0	48.9876	24.4938	-20.7879	3.02758	-6.86618	6.59447e-12	3.42418e-10	hsa_circ_0054243	chr2	42286268	42304551	+	18283	956	Nhek, K562, Huvec, Hepg2, Helas3, H1hesc, Gm12878, Bj, Ag04450, A549, Sknshra, Mcf7	--	ANNOTATED, CDS, coding, INTERNAL, OVCODE, OVEXON	NM_019063	EML4	Salzman2013	http://www.circbase.org/cgi-bin/singlerecord.cgi?id=hsa_circ_0054243
chr11_76546297_76542216_-4081	0	61.525	30.7625	-21.5856	3.0273	-7.13033	1.00129e-12	5.265e-11	--	--	--	--	--	--	--	--	--	--	--	--	--	--
chr9_3651867_3647338_-4529	0	39.3302	19.6651	-21.8127	3.02792	-7.20385	5.8536e-13	3.1579e-11	--	--	--	--	--	--	--	--	--	--	--	--	--	--
chr2_37201726_37199704_-2022	0	36.6302	18.3151	-21.8655	3.02805	-7.221	5.16075e-13	2.82076e-11	hsa_circ_0007047	chr2	37199703	37201726	+	2023	246	Hs68_RNase, Hs68_control, K562, Helas3, Gm12878	None	ANNOTATED, INTERNAL, ncRNA, OVERLAPTX, OVEXON	NR_037879	LOC100505876	Jeck2013, Salzman2013	http://www.circbase.org/cgi-bin/singlerecord.cgi?id=hsa_circ_0007047
chr8_91102845_91102216_-629	0	107.383	53.6913	-21.9465	3.02682	-7.25068	4.14673e-13	2.29674e-11	--	--	--	--	--	--	--	--	--	--	--	--	--	--
chr15_41070547_41069570_-977	0	43.9832	21.9916	-21.9555	3.02774	-7.25145	4.1233e-13	2.29674e-11	hsa_circ_0007489	chr15	41069569	41070547	-	978	177	Hs68_RNase, Hs68_control, Nhek, K562, Huvec, Hmec, Hepg2, Helas3, H1hesc, Gm12878, Bj, Ag04450, A549, Sknshra, Mcf7	None	ANNOTATED, CDS, coding, INTERNAL, OVCODE, OVEXON	NM_017553	INO80	Jeck2013, Salzman2013	http://www.circbase.org/cgi-bin/singlerecord.cgi?id=hsa_circ_0007489
chr14_49608121_49602370_-5751	0	40.1628	20.0814	-21.9927	3.02789	-7.2634	3.77478e-13	2.14801e-11	--	--	--	--	--	--	--	--	--	--	--	--	--	--
chr1_59378838_59339957_-38881	0	41.3055	20.6527	-22.0302	3.02784	-7.27588	3.44169e-13	1.98566e-11	--	--	--	--	--	--	--	--	--	--	--	--	--	--
chr1_71033186_71012305_-20881	0	44.0481	22.0241	-22.1196	3.02774	-7.30565	2.75921e-13	1.61433e-11	--	--	--	--	--	--	--	--	--	--	--	--	--	--
chr5_71604468_71592926_-11542	0	44.216	22.108	-22.1292	3.02773	-7.30884	2.6945e-13	1.59899e-11	hsa_circ_0072904	chr5	71592925	71604468	+	11543	495	K562, Gm12878, Bj, Ag04450, A549, Nhek, Sknshra	--	ANNOTATED, CDS, coding, INTERNAL, OVCODE, OVEXON	NM_022132	MCCC2	Salzman2013	http://www.circbase.org/cgi-bin/singlerecord.cgi?id=hsa_circ_0072904
chr1_155415923_155370504_-45419	0	45.7042	22.8521	-22.1753	3.02768	-7.32417	2.40379e-13	1.44715e-11	hsa_circ_0014578	chr1	155370503	155415923	-	45420	858	K562, Bj, Ag04450	--	ANNOTATED, CDS, coding, INTERNAL, OVCODE, OVEXON	NM_018489	ASH1L	Salzman2013	http://www.circbase.org/cgi-bin/singlerecord.cgi?id=hsa_circ_0014578
chr10_100238231_100236850_-1381	0	46.4087	23.2043	-22.1974	3.02766	-7.33156	2.27493e-13	1.38972e-11	hsa_circ_0019504	chr10	100236849	100238231	-	1382	330	Huvec, Helas3, Gm12878, Bj, Mcf7	--	ANNOTATED, CDS, coding, INTERNAL, OVCODE, OVEXON	NM_018294	CWF19L1	Salzman2013	http://www.circbase.org/cgi-bin/singlerecord.cgi?id=hsa_circ_0019504
chr4_39877153_39872986_-4167	0	49.5413	24.7707	-22.2859	3.02756	-7.36098	1.82559e-13	1.14902e-11	--	--	--	--	--	--	--	--	--	--	--	--	--	--
chr3_170172712_170145423_-27289	0	49.6755	24.8378	-22.2903	3.02756	-7.36246	1.80546e-13	1.14902e-11	hsa_circ_0067913	chr3	170145422	170172712	-	27290	492	K562, Huvec, Hepg2, Helas3, H1hesc, Gm12878, Bj, Ag04450, A549, Nhlf, Sknshra	--	ANNOTATED, CDS, coding, INTERNAL, OVCODE, OVERLAPTX, OVEXON	NM_024947	PHC3	Salzman2013	http://www.circbase.org/cgi-bin/singlerecord.cgi?id=hsa_circ_0067913
chr2_182967361_182962159_-5202	0	50.087	25.0435	-22.3009	3.02755	-7.36601	1.75817e-13	1.14116e-11	hsa_circ_0057276	chr2	182962158	182967361	-	5203	399	Nhek, K562, Helas3, H1hesc	--	ANNOTATED, CDS, coding, INTERNAL, OVCODE, OVEXON	NM_205842	NCKAP1	Salzman2013	http://www.circbase.org/cgi-bin/singlerecord.cgi?id=hsa_circ_0057276
chr6_42617338_42603588_-13750	0	50.5435	25.2717	-22.3155	3.02754	-7.37084	1.6956e-13	1.11802e-11	--	--	--	--	--	--	--	--	--	--	--	--	--	--
chr19_45398339_45398005_-334	0	56.5677	28.2839	-22.3372	3.02739	-7.37836	1.60248e-13	1.07366e-11	hsa_circ_0008615	chr19	45398004	45398339	-	335	219	Hs68_RNase, Hs68_control, Hepg2, Helas3, H1hesc, Bj, Ag04450, Nhek, Sknshra	None	ANNOTATED, CDS, coding, INTERNAL, OVCODE, OVEXON, UTR5	NM_001142502	PPP1R13L	Jeck2013, Salzman2013	http://www.circbase.org/cgi-bin/singlerecord.cgi?id=hsa_circ_0008615
chr8_99442635_99431537_-11098	0	51.8856	25.9428	-22.3509	3.0275	-7.38261	1.5521e-13	1.05696e-11	hsa_circ_0085081	chr8	99431536	99442635	+	11099	363	K562, H1hesc	--	ANNOTATED, CDS, coding, INTERNAL, OVCODE, OVERLAPTX, OVEXON	NM_017890	VPS13B	Salzman2013	http://www.circbase.org/cgi-bin/singlerecord.cgi?id=hsa_circ_0085081
chr7_12229819_12224226_-5593	0	57.3095	28.6548	-22.3782	3.02738	-7.39194	1.44703e-13	1.00183e-11	hsa_circ_0079449	chr7	12224225	12229819	+	5594	301	Nhek, Gm12878, Bj, Ag04450, A549, Sknshra	--	ANNOTATED, CDS, coding, INTERNAL, OVCODE, OVEXON	NM_018374	TMEM106B	Salzman2013	http://www.circbase.org/cgi-bin/singlerecord.cgi?id=hsa_circ_0079449
chr3_141529802_141512163_-17639	0	57.8066	28.9033	-22.382	3.02737	-7.39321	1.43324e-13	1.00183e-11	--	--	--	--	--	--	--	--	--	--	--	--	--	--
chr10_836506_829385_-7121	0	53.4621	26.7311	-22.3936	3.02746	-7.39681	1.39498e-13	9.99093e-12	--	--	--	--	--	--	--	--	--	--	--	--	--	--
chr12_64490119_64488487_-1632	0	53.6043	26.8021	-22.3971	3.02746	-7.39799	1.38259e-13	9.99093e-12	--	--	--	--	--	--	--	--	--	--	--	--	--	--
chr1_95173889_95143891_-29998	0	54.4278	27.2139	-22.4168	3.02744	-7.40454	1.31607e-13	9.7624e-12	hsa_circ_0005720	chr1	95143890	95173889	+	29999	484	Hs68_RNase, Hs68_control, K562, Helas3, H1hesc, A549, Sknshra	None	ANNOTATED, CDS, coding, INTERNAL, OVCODE, OVEXON, UTR5	NM_001199679	TMEM56	Jeck2013, Salzman2013	http://www.circbase.org/cgi-bin/singlerecord.cgi?id=hsa_circ_0005720
chr3_183762279_183756528_-5751	0	54.541	27.2705	-22.4205	3.02744	-7.40576	1.30405e-13	9.7624e-12	hsa_circ_0008096	chr3	183756527	183762279	+	5752	557	Hs68_RNase, Hs68_control	None	ANNOTATED, CDS, coding, INTERNAL, OVCODE, OVEXON	NM_018023	YEATS2	Jeck2013	http://www.circbase.org/cgi-bin/singlerecord.cgi?id=hsa_circ_0008096
chr6_87375710_87356301_-19409	0	54.5511	27.2755	-22.4211	3.02744	-7.40598	1.30187e-13	9.7624e-12	--	--	--	--	--	--	--	--	--	--	--	--	--	--
chr3_17406526_17372075_-34451	0	54.88	27.44	-22.4297	3.02743	-7.40882	1.27428e-13	9.7624e-12	hsa_circ_0064550	chr3	17372074	17406526	-	34452	828	K562	--	ANNOTATED, CDS, coding, INTERNAL, OVCODE, OVEXON	NM_014744	TBC1D5	Salzman2013	http://www.circbase.org/cgi-bin/singlerecord.cgi?id=hsa_circ_0064550
chr17_47172064_47143883_-28181	0	55.2295	27.6148	-22.4392	3.02742	-7.41199	1.24421e-13	9.7624e-12	hsa_circ_0044232	chr17	47143882	47172064	-	28182	1085	K562, A549	LINE	ANNOTATED, CDS, coding, INTERNAL, OVCODE, OVERLAPTX, OVEXON	NM_001114091	CDC27	Salzman2013	http://www.circbase.org/cgi-bin/singlerecord.cgi?id=hsa_circ_0044232
chr1_174371072_174272414_-98658	0	56.8826	28.4413	-22.4765	3.02739	-7.42439	1.13299e-13	9.2283e-12	hsa_circ_0015331	chr1	174272413	174371072	+	98659	573	K562	--	ANNOTATED, CDS, coding, INTERNAL, OVCODE, OVEXON	NM_014857	RABGAP1L	Salzman2013	http://www.circbase.org/cgi-bin/singlerecord.cgi?id=hsa_circ_0015331
chr9_5923309_5920544_-2765	0	57.3408	28.6704	-22.4898	3.02738	-7.4288	1.0959e-13	9.1047e-12	--	--	--	--	--	--	--	--	--	--	--	--	--	--
chrx_68522917_68511849_-11068	0	57.6429	28.8215	-22.4984	3.02737	-7.43167	1.07238e-13	9.09115e-12	--	--	--	--	--	--	--	--	--	--	--	--	--	--
chr17_3821352_3818263_-3089	0	57.92	28.96	-22.5039	3.02736	-7.43349	1.05769e-13	9.09115e-12	--	--	--	--	--	--	--	--	--	--	--	--	--	--
chr11_47746394_47743953_-2441	0	58.9601	29.48	-22.5251	3.02734	-7.44053	1.00282e-13	8.86318e-12	--	--	--	--	--	--	--	--	--	--	--	--	--	--
chr6_85574378_85572137_-2241	0	59.915	29.9575	-22.554	3.02733	-7.45014	9.32387e-14	8.41986e-12	hsa_circ_0004990	chr6	85572136	85574378	-	2242	277	Hs68_RNase, Hs68_control	None	ANNOTATED, CDS, coding, INTERNAL, OVCODE, OVEXON	NM_153816	SNX14	Jeck2013	http://www.circbase.org/cgi-bin/singlerecord.cgi?id=hsa_circ_0004990
chr12_96300360_96298869_-1491	0	60.7892	30.3946	-22.5604	3.02731	-7.45229	9.17362e-14	8.41986e-12	hsa_circ_0007881	chr12	96298868	96300360	-	1492	172	Hs68_RNase, Hs68_control, K562, Huvec, Ag04450	None	ANNOTATED, CDS, coding, INTERNAL, OVCODE, OVEXON	NM_001170464	CDK17	Jeck2013, Salzman2013	http://www.circbase.org/cgi-bin/singlerecord.cgi?id=hsa_circ_0007881
chr7_38796864_38789801_-7063	0	61.3626	30.6813	-22.5862	3.0273	-7.46084	8.59712e-14	8.11646e-12	hsa_circ_0002808	chr7	38789800	38796864	-	7064	334	Hs68_RNase, Hs68_control, Nhek, K562, A549	None	ANNOTATED, CDS, coding, INTERNAL, OVCODE, OVEXON	NM_014396	VPS41	Jeck2013, Salzman2013	http://www.circbase.org/cgi-bin/singlerecord.cgi?id=hsa_circ_0002808
chr12_66211597_66203711_-7886	0	61.6031	30.8015	-22.5893	3.02729	-7.46188	8.5294e-14	8.11646e-12	hsa_circ_0000414	chr12	66203710	66211597	+	7887	455	cd_34, Hs68_RNase, Hs68_control	None	ANNOTATED, CDS, coding, INTERNAL, OVCODE, OVEXON	NM_007199	IRAK3	Jeck2013, Memczak2013	http://www.circbase.org/cgi-bin/singlerecord.cgi?id=hsa_circ_0000414
chr12_19514784_19500097_-14687	0	62.3062	31.1531	-22.6062	3.02728	-7.4675	8.1731e-14	8.11646e-12	--	--	--	--	--	--	--	--	--	--	--	--	--	--
chr2_11214463_11200957_-13506	0	62.4374	31.2187	-22.6102	3.02728	-7.46882	8.09167e-14	8.11646e-12	--	--	--	--	--	--	--	--	--	--	--	--	--	--
chr2_99371730_99369392_-2338	0	66.6103	33.3051	-22.6953	3.02721	-7.49709	6.52483e-14	7.13267e-12	--	--	--	--	--	--	--	--	--	--	--	--	--	--
chr19_34215661_34208929_-6732	0	66.5021	33.2511	-22.6973	3.02721	-7.49776	6.49155e-14	7.13267e-12	hsa_circ_0050461	chr19	34208928	34215661	+	6733	366	K562, Ag04450, A549	--	ANNOTATED, CDS, coding, INTERNAL, OVCODE, OVEXON	NM_001114093	LSM14A	Salzman2013	http://www.circbase.org/cgi-bin/singlerecord.cgi?id=hsa_circ_0050461
chr7_122133741_122113118_-20623	0	66.7507	33.3754	-22.7024	3.02721	-7.49945	6.4085e-14	7.13267e-12	hsa_circ_0006919	chr7	122113117	122133741	-	20624	1293	Hs68_RNase, Hs68_control	None	ANNOTATED, CDS, coding, INTERNAL, OVCODE, OVEXON, UTR5	NM_005763	AASS	Jeck2013	http://www.circbase.org/cgi-bin/singlerecord.cgi?id=hsa_circ_0006919
chr11_95189961_95184420_-5541	0	69.7871	34.8936	-22.758	3.02717	-7.51792	5.56532e-14	6.79952e-12	--	--	--	--	--	--	--	--	--	--	--	--	--	--
chr9_33900271_33886881_-13390	0	70.5437	35.2719	-22.7779	3.02715	-7.52453	5.29088e-14	6.79952e-12	hsa_circ_0003624	chr9	33886880	33900271	+	13391	185	Hs68_RNase, Hs68_control, K562, Huvec, Hepg2, Helas3, H1hesc, Gm12878, Bj, Ag04450, A549, Nhek, Sknshra	None	ANNOTATED, CDS, coding, INTERNAL, OVCODE, OVEXON	NM_017811	UBE2R2	Jeck2013, Salzman2013	http://www.circbase.org/cgi-bin/singlerecord.cgi?id=hsa_circ_0003624
chr9_33278225_33271152_-7073	0	72.6238	36.3119	-22.817	3.02713	-7.5375	4.79062e-14	6.63341e-12	hsa_circ_0003575	chr9	33271151	33278225	+	7074	294	Hs68_RNase, Hs68_control	None	ANNOTATED, CDS, coding, INTERNAL, OVCODE, OVEXON	NM_016410	CHMP5	Jeck2013	http://www.circbase.org/cgi-bin/singlerecord.cgi?id=hsa_circ_0003575
chr20_8765358_8740344_-25014	0	72.7991	36.3996	-22.8195	3.02712	-7.53833	4.76018e-14	6.63341e-12	--	--	--	--	--	--	--	--	--	--	--	--	--	--
chr1_243637742_243613671_-24071	0	73.5631	36.7815	-22.8263	3.02711	-7.54062	4.67743e-14	6.63341e-12	hsa_circ_0006696	chr1	243613670	243637742	-	24072	267	Hs68_RNase, Hs68_control, A549, Sknshra	None	ANNOTATED, CDS, coding, INTERNAL, OVCODE, OVEXON	NM_005465	AKT3	Jeck2013, Salzman2013	http://www.circbase.org/cgi-bin/singlerecord.cgi?id=hsa_circ_0006696
chr3_125580040_125560379_-19661	0	75.4853	37.7427	-22.8715	3.02709	-7.5556	4.16936e-14	6.63341e-12	--	--	--	--	--	--	--	--	--	--	--	--	--	--
chr2_232833093_232832857_-236	0	83.7914	41.8957	-23.0156	3.027	-7.60342	2.88412e-14	5.44574e-12	--	--	--	--	--	--	--	--	--	--	--	--	--	--
chr13_20067390_20061053_-6337	0	86.4739	43.237	-23.0637	3.02698	-7.6194	2.54859e-14	5.28115e-12	--	--	--	--	--	--	--	--	--	--	--	--	--	--
chr1_61159155_61111371_-47784	0	86.7592	43.3796	-23.0675	3.02697	-7.62066	2.52389e-14	5.28115e-12	--	--	--	--	--	--	--	--	--	--	--	--	--	--
chr6_42617507_42603588_-13919	0	90.8312	45.4156	-23.1323	3.02694	-7.64215	2.1363e-14	5.28115e-12	--	--	--	--	--	--	--	--	--	--	--	--	--	--
chr18_62102902_62097681_-5221	0	96.5839	48.292	-23.217	3.02689	-7.67024	1.71678e-14	5.28115e-12	--	--	--	--	--	--	--	--	--	--	--	--	--	--
chr1_236183906_236168706_-15200	0	106.681	53.3404	-23.3515	3.02683	-7.71485	1.21121e-14	5.28115e-12	--	--	--	--	--	--	--	--	--	--	--	--	--	--
chr12_106843947_106825726_-18221	0	113.989	56.9946	-23.4487	3.02679	-7.74707	9.40342e-15	5.28115e-12	--	--	--	--	--	--	--	--	--	--	--	--	--	--
