# Supplementary material for: Exosomal hsa_circ_0007047 Attenuates Pos-myocardial Infarction Remodeling by Promoting Angiogenesis via miR-1178-3p/PDPK1 Axis
Source: Research Square preprint supplement (doi:10.21203/rs.3.rs-827822/v1), 2021-09-01
Supplement: Supplementary file 2 [file 4b81da94fd5646b6a759e3a4.xlsx]

## Sheet: miRDB
Target Detail	Target Rank	Target Score	miRNA Name	Gene Symbol	Gene Description
Details	1	99	hsa-miR-1178-3p	AMMECR1	Alport syndrome, mental retardation, midface hypoplasia and elliptocytosis chromosomal region gene 1
Details	2	97	hsa-miR-1178-3p	DNAH6	dynein axonemal heavy chain 6
Details	3	96	hsa-miR-1178-3p	SLC39A6	solute carrier family 39 member 6
Details	4	96	hsa-miR-1178-3p	GNAS	GNAS complex locus
Details	5	96	hsa-miR-1178-3p	GLS	glutaminase
Details	6	95	hsa-miR-1178-3p	ATP1B1	ATPase Na+/K+ transporting subunit beta 1
Details	7	94	hsa-miR-1178-3p	ZMAT4	zinc finger matrin-type 4
Details	8	94	hsa-miR-1178-3p	GPM6A	glycoprotein M6A
Details	9	94	hsa-miR-1178-3p	LEMD3	LEM domain containing 3
Details	10	94	hsa-miR-1178-3p	NPTN	neuroplastin
Details	11	94	hsa-miR-1178-3p	SPAG9	sperm associated antigen 9
Details	12	94	hsa-miR-1178-3p	ZZZ3	zinc finger ZZ-type containing 3
Details	13	93	hsa-miR-1178-3p	SNCA	synuclein alpha
Details	14	93	hsa-miR-1178-3p	FAM199X	family with sequence similarity 199, X-linked
Details	15	93	hsa-miR-1178-3p	ZNF385A	zinc finger protein 385A
Details	16	93	hsa-miR-1178-3p	EIF1B	eukaryotic translation initiation factor 1B
Details	17	93	hsa-miR-1178-3p	MSL3	MSL complex subunit 3
Details	18	92	hsa-miR-1178-3p	FAM98A	family with sequence similarity 98 member A
Details	19	92	hsa-miR-1178-3p	RIMBP2	RIMS binding protein 2
Details	20	92	hsa-miR-1178-3p	PPP3CB	protein phosphatase 3 catalytic subunit beta
Details	21	92	hsa-miR-1178-3p	AFF4	AF4/FMR2 family member 4
Details	22	92	hsa-miR-1178-3p	TMPRSS11E	transmembrane serine protease 11E
Details	23	91	hsa-miR-1178-3p	ZNF888	zinc finger protein 888
Details	24	91	hsa-miR-1178-3p	BCL2	BCL2, apoptosis regulator
Details	25	91	hsa-miR-1178-3p	SPTLC1	serine palmitoyltransferase long chain base subunit 1
Details	26	91	hsa-miR-1178-3p	CDH13	cadherin 13
Details	27	90	hsa-miR-1178-3p	STMN2	stathmin 2
Details	28	90	hsa-miR-1178-3p	CDK8	cyclin dependent kinase 8
Details	29	90	hsa-miR-1178-3p	AADAC	arylacetamide deacetylase
Details	30	90	hsa-miR-1178-3p	SRPRA	SRP receptor subunit alpha
Details	31	90	hsa-miR-1178-3p	ZXDC	ZXD family zinc finger C
Details	32	89	hsa-miR-1178-3p	ATAD2B	ATPase family, AAA domain containing 2B
Details	33	89	hsa-miR-1178-3p	TSPYL4	TSPY like 4
Details	34	89	hsa-miR-1178-3p	ELK4	ELK4, ETS transcription factor
Details	35	89	hsa-miR-1178-3p	ALDH1B1	aldehyde dehydrogenase 1 family member B1
Details	36	89	hsa-miR-1178-3p	SLC45A3	solute carrier family 45 member 3
Details	37	89	hsa-miR-1178-3p	HNRNPR	heterogeneous nuclear ribonucleoprotein R
Details	38	89	hsa-miR-1178-3p	KLRG1	killer cell lectin like receptor G1
Details	39	89	hsa-miR-1178-3p	ZNF510	zinc finger protein 510
Details	40	89	hsa-miR-1178-3p	MMGT1	membrane magnesium transporter 1
Details	41	89	hsa-miR-1178-3p	GABRA5	gamma-aminobutyric acid type A receptor alpha5 subunit
Details	42	89	hsa-miR-1178-3p	MYO5B	myosin VB
Details	43	88	hsa-miR-1178-3p	MYH10	myosin heavy chain 10
Details	44	88	hsa-miR-1178-3p	HHIP	hedgehog interacting protein
Details	45	88	hsa-miR-1178-3p	CRY2	cryptochrome circadian regulator 2
Details	46	87	hsa-miR-1178-3p	ADAM9	ADAM metallopeptidase domain 9
Details	47	87	hsa-miR-1178-3p	CNOT6L	CCR4-NOT transcription complex subunit 6 like
Details	48	87	hsa-miR-1178-3p	LZTS3	leucine zipper tumor suppressor family member 3
Details	49	87	hsa-miR-1178-3p	FNDC3B	fibronectin type III domain containing 3B
Details	50	87	hsa-miR-1178-3p	NUDT21	nudix hydrolase 21
Details	51	87	hsa-miR-1178-3p	ARHGAP31	Rho GTPase activating protein 31
Details	52	86	hsa-miR-1178-3p	IPO5	importin 5
Details	53	86	hsa-miR-1178-3p	HERPUD1	homocysteine inducible ER protein with ubiquitin like domain 1
Details	54	86	hsa-miR-1178-3p	MAT2A	methionine adenosyltransferase 2A
Details	55	86	hsa-miR-1178-3p	SUPT7L	SPT7 like, STAGA complex gamma subunit
Details	56	85	hsa-miR-1178-3p	SLC5A12	solute carrier family 5 member 12
Details	57	85	hsa-miR-1178-3p	LYPD1	LY6/PLAUR domain containing 1
Details	58	85	hsa-miR-1178-3p	TUB	tubby bipartite transcription factor
Details	59	85	hsa-miR-1178-3p	PEX11A	peroxisomal biogenesis factor 11 alpha
Details	60	85	hsa-miR-1178-3p	SEZ6L2	seizure related 6 homolog like 2
Details	61	85	hsa-miR-1178-3p	COL19A1	collagen type XIX alpha 1 chain
Details	62	84	hsa-miR-1178-3p	EGR3	early growth response 3
Details	63	84	hsa-miR-1178-3p	NAA30	N(alpha)-acetyltransferase 30, NatC catalytic subunit
Details	64	84	hsa-miR-1178-3p	ASB7	ankyrin repeat and SOCS box containing 7
Details	65	84	hsa-miR-1178-3p	GABRB2	gamma-aminobutyric acid type A receptor beta2 subunit
Details	66	84	hsa-miR-1178-3p	ZNF577	zinc finger protein 577
Details	67	84	hsa-miR-1178-3p	ATXN1	ataxin 1
Details	68	83	hsa-miR-1178-3p	DCUN1D3	defective in cullin neddylation 1 domain containing 3
Details	69	83	hsa-miR-1178-3p	RIMKLA	ribosomal modification protein rimK like family member A
Details	70	83	hsa-miR-1178-3p	MAGI2	membrane associated guanylate kinase, WW and PDZ domain containing 2
Details	71	83	hsa-miR-1178-3p	CEP126	centrosomal protein 126
Details	72	83	hsa-miR-1178-3p	RORA	RAR related orphan receptor A
Details	73	82	hsa-miR-1178-3p	SNU13	small nuclear ribonucleoprotein 13
Details	74	82	hsa-miR-1178-3p	PDPK1	3-phosphoinositide dependent protein kinase 1
Details	75	82	hsa-miR-1178-3p	TMEM184B	transmembrane protein 184B
Details	76	82	hsa-miR-1178-3p	DLG1	discs large MAGUK scaffold protein 1
Details	77	82	hsa-miR-1178-3p	NUS1	NUS1, dehydrodolichyl diphosphate synthase subunit
Details	78	82	hsa-miR-1178-3p	ABCA12	ATP binding cassette subfamily A member 12
Details	79	82	hsa-miR-1178-3p	PCDHB10	protocadherin beta 10
Details	80	82	hsa-miR-1178-3p	EWSR1	EWS RNA binding protein 1
Details	81	82	hsa-miR-1178-3p	GPAM	glycerol-3-phosphate acyltransferase, mitochondrial
Details	82	81	hsa-miR-1178-3p	NUTM2G	NUT family member 2G
Details	83	81	hsa-miR-1178-3p	CENPI	centromere protein I
Details	84	81	hsa-miR-1178-3p	ATG5	autophagy related 5
Details	85	81	hsa-miR-1178-3p	ZNF701	zinc finger protein 701
Details	86	81	hsa-miR-1178-3p	CXCL6	C-X-C motif chemokine ligand 6
Details	87	81	hsa-miR-1178-3p	CDH23	cadherin related 23
Details	88	80	hsa-miR-1178-3p	APBA1	amyloid beta precursor protein binding family A member 1
Details	89	80	hsa-miR-1178-3p	ZNF780B	zinc finger protein 780B
Details	90	80	hsa-miR-1178-3p	PIAS2	protein inhibitor of activated STAT 2
Details	91	80	hsa-miR-1178-3p	WDR48	WD repeat domain 48
Details	92	80	hsa-miR-1178-3p	MAP3K2	mitogen-activated protein kinase kinase kinase 2
Details	93	80	hsa-miR-1178-3p	KIF4A	kinesin family member 4A
Details	94	80	hsa-miR-1178-3p	TTC17	tetratricopeptide repeat domain 17
Details	95	80	hsa-miR-1178-3p	PTPN5	protein tyrosine phosphatase, non-receptor type 5
Details	96	80	hsa-miR-1178-3p	SUZ12	SUZ12, polycomb repressive complex 2 subunit
Details	97	79	hsa-miR-1178-3p	SOCS5	suppressor of cytokine signaling 5
Details	98	79	hsa-miR-1178-3p	SRSF2	serine and arginine rich splicing factor 2
Details	99	79	hsa-miR-1178-3p	RPS6KA6	ribosomal protein S6 kinase A6
Details	100	79	hsa-miR-1178-3p	BMPR2	bone morphogenetic protein receptor type 2
Details	101	79	hsa-miR-1178-3p	CBLN2	cerebellin 2 precursor
Details	102	79	hsa-miR-1178-3p	POC1B	POC1 centriolar protein B
Details	103	79	hsa-miR-1178-3p	MAP3K7CL	MAP3K7 C-terminal like
Details	104	78	hsa-miR-1178-3p	SLC13A3	solute carrier family 13 member 3
Details	105	78	hsa-miR-1178-3p	EFHC1	EF-hand domain containing 1
Details	106	78	hsa-miR-1178-3p	ZNF778	zinc finger protein 778
Details	107	77	hsa-miR-1178-3p	CCDC146	coiled-coil domain containing 146
Details	108	77	hsa-miR-1178-3p	MSH3	mutS homolog 3
Details	109	77	hsa-miR-1178-3p	DNAJC15	DnaJ heat shock protein family (Hsp40) member C15
Details	110	77	hsa-miR-1178-3p	CENPS	centromere protein S
Details	111	77	hsa-miR-1178-3p	EIF4E2	eukaryotic translation initiation factor 4E family member 2
Details	112	77	hsa-miR-1178-3p	TSPYL2	TSPY like 2
Details	113	77	hsa-miR-1178-3p	MBLAC2	metallo-beta-lactamase domain containing 2
Details	114	76	hsa-miR-1178-3p	PRKAA2	protein kinase AMP-activated catalytic subunit alpha 2
Details	115	76	hsa-miR-1178-3p	ROR1	receptor tyrosine kinase like orphan receptor 1
Details	116	76	hsa-miR-1178-3p	RTN3	reticulon 3
Details	117	76	hsa-miR-1178-3p	SYNJ1	synaptojanin 1
Details	118	76	hsa-miR-1178-3p	HSD17B7	hydroxysteroid 17-beta dehydrogenase 7
Details	119	76	hsa-miR-1178-3p	LMLN	leishmanolysin like peptidase
Details	120	76	hsa-miR-1178-3p	PATZ1	POZ/BTB and AT hook containing zinc finger 1
Details	121	76	hsa-miR-1178-3p	PPM1L	protein phosphatase, Mg2+/Mn2+ dependent 1L
Details	122	76	hsa-miR-1178-3p	PATJ	PATJ, crumbs cell polarity complex component
Details	123	76	hsa-miR-1178-3p	CEP41	centrosomal protein 41
Details	124	76	hsa-miR-1178-3p	C9orf78	chromosome 9 open reading frame 78
Details	125	75	hsa-miR-1178-3p	COL4A3BP	collagen type IV alpha 3 binding protein
Details	126	75	hsa-miR-1178-3p	EP400	E1A binding protein p400
Details	127	75	hsa-miR-1178-3p	MRGPRF	MAS related GPR family member F
Details	128	75	hsa-miR-1178-3p	ZBTB24	zinc finger and BTB domain containing 24
Details	129	75	hsa-miR-1178-3p	TPD52L2	TPD52 like 2
Details	130	74	hsa-miR-1178-3p	CNOT2	CCR4-NOT transcription complex subunit 2
Details	131	74	hsa-miR-1178-3p	OCLN	occludin
Details	132	74	hsa-miR-1178-3p	CYP4B1	cytochrome P450 family 4 subfamily B member 1
Details	133	74	hsa-miR-1178-3p	CMPK1	cytidine/uridine monophosphate kinase 1
Details	134	74	hsa-miR-1178-3p	OPRM1	opioid receptor mu 1
Details	135	74	hsa-miR-1178-3p	ST7L	suppression of tumorigenicity 7 like
Details	136	74	hsa-miR-1178-3p	CNGB3	cyclic nucleotide gated channel beta 3
Details	137	74	hsa-miR-1178-3p	TMEM235	transmembrane protein 235
Details	138	74	hsa-miR-1178-3p	SHANK2	SH3 and multiple ankyrin repeat domains 2
Details	139	74	hsa-miR-1178-3p	INSIG1	insulin induced gene 1
Details	140	74	hsa-miR-1178-3p	DLX4	distal-less homeobox 4
Details	141	73	hsa-miR-1178-3p	NDN	necdin, MAGE family member
Details	142	73	hsa-miR-1178-3p	MAPK8	mitogen-activated protein kinase 8
Details	143	73	hsa-miR-1178-3p	INO80	INO80 complex subunit
Details	144	73	hsa-miR-1178-3p	SH3TC2	SH3 domain and tetratricopeptide repeats 2
Details	145	73	hsa-miR-1178-3p	MRAP2	melanocortin 2 receptor accessory protein 2
Details	146	73	hsa-miR-1178-3p	GHSR	growth hormone secretagogue receptor
Details	147	73	hsa-miR-1178-3p	YWHAB	tyrosine 3-monooxygenase/tryptophan 5-monooxygenase activation protein beta
Details	148	73	hsa-miR-1178-3p	MAPK9	mitogen-activated protein kinase 9
Details	149	73	hsa-miR-1178-3p	ZSCAN18	zinc finger and SCAN domain containing 18
Details	150	73	hsa-miR-1178-3p	SREK1IP1	SREK1 interacting protein 1
Details	151	72	hsa-miR-1178-3p	ELMOD2	ELMO domain containing 2
Details	152	72	hsa-miR-1178-3p	CNTF	ciliary neurotrophic factor
Details	153	72	hsa-miR-1178-3p	RABL3	RAB, member of RAS oncogene family like 3
Details	154	72	hsa-miR-1178-3p	PABPC1	poly(A) binding protein cytoplasmic 1
Details	155	72	hsa-miR-1178-3p	GRIP2	glutamate receptor interacting protein 2
Details	156	72	hsa-miR-1178-3p	KMT5B	lysine methyltransferase 5B
Details	157	72	hsa-miR-1178-3p	TGIF2	TGFB induced factor homeobox 2
Details	158	72	hsa-miR-1178-3p	STUB1	STIP1 homology and U-box containing protein 1
Details	159	72	hsa-miR-1178-3p	CCDC186	coiled-coil domain containing 186
Details	160	71	hsa-miR-1178-3p	NFIA	nuclear factor I A
Details	161	71	hsa-miR-1178-3p	ZYG11A	zyg-11 family member A, cell cycle regulator
Details	162	71	hsa-miR-1178-3p	LATS2	large tumor suppressor kinase 2
Details	163	71	hsa-miR-1178-3p	PTPRN	protein tyrosine phosphatase, receptor type N
Details	164	71	hsa-miR-1178-3p	DPY19L1	dpy-19 like C-mannosyltransferase 1
Details	165	71	hsa-miR-1178-3p	PIAS1	protein inhibitor of activated STAT 1
Details	166	71	hsa-miR-1178-3p	PIWIL1	piwi like RNA-mediated gene silencing 1
Details	167	71	hsa-miR-1178-3p	C10orf82	chromosome 10 open reading frame 82
Details	168	71	hsa-miR-1178-3p	SPCS3	signal peptidase complex subunit 3
Details	169	71	hsa-miR-1178-3p	ALDH5A1	aldehyde dehydrogenase 5 family member A1
Details	170	71	hsa-miR-1178-3p	SEC14L2	SEC14 like lipid binding 2
Details	171	71	hsa-miR-1178-3p	PMF1	polyamine modulated factor 1
Details	172	70	hsa-miR-1178-3p	CNP	2',3'-cyclic nucleotide 3' phosphodiesterase
Details	173	70	hsa-miR-1178-3p	NRN1	neuritin 1
Details	174	70	hsa-miR-1178-3p	ADCY2	adenylate cyclase 2
Details	175	70	hsa-miR-1178-3p	ARSK	arylsulfatase family member K
Details	176	70	hsa-miR-1178-3p	RIC8B	RIC8 guanine nucleotide exchange factor B
Details	177	70	hsa-miR-1178-3p	MECP2	methyl-CpG binding protein 2
Details	178	70	hsa-miR-1178-3p	SAMD12	sterile alpha motif domain containing 12
Details	179	70	hsa-miR-1178-3p	RBM22	RNA binding motif protein 22
Details	180	69	hsa-miR-1178-3p	CLEC4A	C-type lectin domain family 4 member A
Details	181	69	hsa-miR-1178-3p	WAC	WW domain containing adaptor with coiled-coil
Details	182	69	hsa-miR-1178-3p	C21orf91	chromosome 21 open reading frame 91
Details	183	69	hsa-miR-1178-3p	RAC1	Rac family small GTPase 1
Details	184	69	hsa-miR-1178-3p	UPF1	UPF1, RNA helicase and ATPase
Details	185	69	hsa-miR-1178-3p	POTEA	POTE ankyrin domain family member A
Details	186	69	hsa-miR-1178-3p	TNKS	tankyrase
Details	187	69	hsa-miR-1178-3p	SEMA5A	semaphorin 5A
Details	188	69	hsa-miR-1178-3p	ZNF559-ZNF177	ZNF559-ZNF177 readthrough
Details	189	69	hsa-miR-1178-3p	H2AFZ	H2A histone family member Z
Details	190	69	hsa-miR-1178-3p	HIP1	huntingtin interacting protein 1
Details	191	68	hsa-miR-1178-3p	MAP3K20	mitogen-activated protein kinase kinase kinase 20
Details	192	68	hsa-miR-1178-3p	CHRNB4	cholinergic receptor nicotinic beta 4 subunit
Details	193	68	hsa-miR-1178-3p	ADAM19	ADAM metallopeptidase domain 19
Details	194	68	hsa-miR-1178-3p	KIAA1191	KIAA1191
Details	195	68	hsa-miR-1178-3p	PYCR2	pyrroline-5-carboxylate reductase 2
Details	196	68	hsa-miR-1178-3p	ACTR3	ARP3 actin related protein 3 homolog
Details	197	68	hsa-miR-1178-3p	JADE1	jade family PHD finger 1
Details	198	68	hsa-miR-1178-3p	CABP4	calcium binding protein 4
Details	199	68	hsa-miR-1178-3p	FPGT	fucose-1-phosphate guanylyltransferase
Details	200	67	hsa-miR-1178-3p	DPM1	dolichyl-phosphate mannosyltransferase subunit 1, catalytic
Details	201	67	hsa-miR-1178-3p	CELF2	CUGBP Elav-like family member 2
Details	202	67	hsa-miR-1178-3p	DLEU7	deleted in lymphocytic leukemia 7
Details	203	67	hsa-miR-1178-3p	MICU1	mitochondrial calcium uptake 1
Details	204	67	hsa-miR-1178-3p	RIMS1	regulating synaptic membrane exocytosis 1
Details	205	67	hsa-miR-1178-3p	SELENOI	selenoprotein I
Details	206	67	hsa-miR-1178-3p	LCOR	ligand dependent nuclear receptor corepressor
Details	207	67	hsa-miR-1178-3p	GFOD2	glucose-fructose oxidoreductase domain containing 2
Details	208	66	hsa-miR-1178-3p	OPRPN	opiorphin prepropeptide
Details	209	66	hsa-miR-1178-3p	RAB21	RAB21, member RAS oncogene family
Details	210	66	hsa-miR-1178-3p	KIAA1324L	KIAA1324 like
Details	211	66	hsa-miR-1178-3p	ZFHX3	zinc finger homeobox 3
Details	212	66	hsa-miR-1178-3p	BRSK2	BR serine/threonine kinase 2
Details	213	66	hsa-miR-1178-3p	NAT8L	N-acetyltransferase 8 like
Details	214	66	hsa-miR-1178-3p	SCN2A	sodium voltage-gated channel alpha subunit 2
Details	215	66	hsa-miR-1178-3p	CRIM1	cysteine rich transmembrane BMP regulator 1
Details	216	66	hsa-miR-1178-3p	METTL16	methyltransferase like 16
Details	217	66	hsa-miR-1178-3p	TMEM182	transmembrane protein 182
Details	218	66	hsa-miR-1178-3p	MRPL19	mitochondrial ribosomal protein L19
Details	219	66	hsa-miR-1178-3p	CAMK2D	calcium/calmodulin dependent protein kinase II delta
Details	220	66	hsa-miR-1178-3p	CPEB2	cytoplasmic polyadenylation element binding protein 2
Details	221	66	hsa-miR-1178-3p	LMCD1	LIM and cysteine rich domains 1
Details	222	66	hsa-miR-1178-3p	API5	apoptosis inhibitor 5
Details	223	65	hsa-miR-1178-3p	COLEC10	collectin subfamily member 10
Details	224	65	hsa-miR-1178-3p	CLIC4	chloride intracellular channel 4
Details	225	65	hsa-miR-1178-3p	TFAP2A	transcription factor AP-2 alpha
Details	226	65	hsa-miR-1178-3p	PELI1	pellino E3 ubiquitin protein ligase 1
Details	227	65	hsa-miR-1178-3p	TM9SF2	transmembrane 9 superfamily member 2
Details	228	65	hsa-miR-1178-3p	RO60	Ro60, Y RNA binding protein
Details	229	65	hsa-miR-1178-3p	U2SURP	U2 snRNP associated SURP domain containing
Details	230	64	hsa-miR-1178-3p	C1orf216	chromosome 1 open reading frame 216
Details	231	64	hsa-miR-1178-3p	MINK1	misshapen like kinase 1
Details	232	64	hsa-miR-1178-3p	OSBPL11	oxysterol binding protein like 11
Details	233	64	hsa-miR-1178-3p	KIF1C	kinesin family member 1C
Details	234	64	hsa-miR-1178-3p	NCAPH	non-SMC condensin I complex subunit H
Details	235	64	hsa-miR-1178-3p	TMEM179	transmembrane protein 179
Details	236	64	hsa-miR-1178-3p	MTSS1	MTSS1, I-BAR domain containing
Details	237	64	hsa-miR-1178-3p	TMED3	transmembrane p24 trafficking protein 3
Details	238	64	hsa-miR-1178-3p	ZFP90	ZFP90 zinc finger protein
Details	239	63	hsa-miR-1178-3p	PSMC6	proteasome 26S subunit, ATPase 6
Details	240	63	hsa-miR-1178-3p	GPATCH2L	G-patch domain containing 2 like
Details	241	63	hsa-miR-1178-3p	DYNLRB1	dynein light chain roadblock-type 1
Details	242	63	hsa-miR-1178-3p	SRGAP2C	SLIT-ROBO Rho GTPase activating protein 2C
Details	243	63	hsa-miR-1178-3p	AXIN2	axin 2
Details	244	63	hsa-miR-1178-3p	PSD2	pleckstrin and Sec7 domain containing 2
Details	245	63	hsa-miR-1178-3p	ERG28	ergosterol biosynthesis 28 homolog
Details	246	63	hsa-miR-1178-3p	SCN1A	sodium voltage-gated channel alpha subunit 1
Details	247	63	hsa-miR-1178-3p	MAP3K19	mitogen-activated protein kinase kinase kinase 19
Details	248	63	hsa-miR-1178-3p	MAEA	macrophage erythroblast attacher
Details	249	63	hsa-miR-1178-3p	HSCB	HscB mitochondrial iron-sulfur cluster cochaperone
Details	250	63	hsa-miR-1178-3p	TBL1XR1	transducin beta like 1 X-linked receptor 1
Details	251	63	hsa-miR-1178-3p	PGK1	phosphoglycerate kinase 1
Details	252	63	hsa-miR-1178-3p	ZNF395	zinc finger protein 395
Details	253	62	hsa-miR-1178-3p	FABP5	fatty acid binding protein 5
Details	254	62	hsa-miR-1178-3p	HTT	huntingtin
Details	255	62	hsa-miR-1178-3p	ANAPC10	anaphase promoting complex subunit 10
Details	256	62	hsa-miR-1178-3p	FKBP4	FKBP prolyl isomerase 4
Details	257	62	hsa-miR-1178-3p	ZBTB41	zinc finger and BTB domain containing 41
Details	258	62	hsa-miR-1178-3p	TSPAN9	tetraspanin 9
Details	259	62	hsa-miR-1178-3p	TMEM178B	transmembrane protein 178B
Details	260	62	hsa-miR-1178-3p	SLC35D1	solute carrier family 35 member D1
Details	261	61	hsa-miR-1178-3p	PLAG1	PLAG1 zinc finger
Details	262	61	hsa-miR-1178-3p	METTL15	methyltransferase like 15
Details	263	61	hsa-miR-1178-3p	CACNG2	calcium voltage-gated channel auxiliary subunit gamma 2
Details	264	61	hsa-miR-1178-3p	CHST14	carbohydrate sulfotransferase 14
Details	265	61	hsa-miR-1178-3p	DELE1	DAP3 binding cell death enhancer 1
Details	266	61	hsa-miR-1178-3p	CMYA5	cardiomyopathy associated 5
Details	267	61	hsa-miR-1178-3p	PKP4	plakophilin 4
Details	268	61	hsa-miR-1178-3p	KANK2	KN motif and ankyrin repeat domains 2
Details	269	61	hsa-miR-1178-3p	IL1B	interleukin 1 beta
Details	270	61	hsa-miR-1178-3p	ITPKB	inositol-trisphosphate 3-kinase B
Details	271	61	hsa-miR-1178-3p	MSRB3	methionine sulfoxide reductase B3
Details	272	61	hsa-miR-1178-3p	ANXA8	annexin A8
Details	273	61	hsa-miR-1178-3p	CAMK1D	calcium/calmodulin dependent protein kinase ID
Details	274	61	hsa-miR-1178-3p	SGCZ	sarcoglycan zeta
Details	275	61	hsa-miR-1178-3p	PPM1B	protein phosphatase, Mg2+/Mn2+ dependent 1B
Details	276	61	hsa-miR-1178-3p	LOC339862	uncharacterized LOC339862
Details	277	60	hsa-miR-1178-3p	MEIS1	Meis homeobox 1
Details	278	60	hsa-miR-1178-3p	KHDRBS1	KH RNA binding domain containing, signal transduction associated 1
Details	279	60	hsa-miR-1178-3p	NHLRC2	NHL repeat containing 2
Details	280	60	hsa-miR-1178-3p	LRRN3	leucine rich repeat neuronal 3
Details	281	60	hsa-miR-1178-3p	BTBD9	BTB domain containing 9
Details	282	60	hsa-miR-1178-3p	SEMA4G	semaphorin 4G
Details	283	60	hsa-miR-1178-3p	PLAC1	placenta specific 1
Details	284	60	hsa-miR-1178-3p	TSPAN4	tetraspanin 4
Details	285	59	hsa-miR-1178-3p	RAD51AP1	RAD51 associated protein 1
Details	286	59	hsa-miR-1178-3p	WNK4	WNK lysine deficient protein kinase 4
Details	287	59	hsa-miR-1178-3p	LDLRAD4	low density lipoprotein receptor class A domain containing 4
Details	288	59	hsa-miR-1178-3p	PTPRQ	protein tyrosine phosphatase, receptor type Q
Details	289	59	hsa-miR-1178-3p	CADM2	cell adhesion molecule 2
Details	290	59	hsa-miR-1178-3p	PMEPA1	prostate transmembrane protein, androgen induced 1
Details	291	59	hsa-miR-1178-3p	CD274	CD274 molecule
Details	292	59	hsa-miR-1178-3p	LMO4	LIM domain only 4
Details	293	59	hsa-miR-1178-3p	FAM83A	family with sequence similarity 83 member A
Details	294	59	hsa-miR-1178-3p	PANK3	pantothenate kinase 3
Details	295	59	hsa-miR-1178-3p	POU3F2	POU class 3 homeobox 2
Details	296	59	hsa-miR-1178-3p	SLC30A7	solute carrier family 30 member 7
Details	297	59	hsa-miR-1178-3p	G3BP2	G3BP stress granule assembly factor 2
Details	298	59	hsa-miR-1178-3p	CDHR3	cadherin related family member 3
Details	299	59	hsa-miR-1178-3p	ZNF445	zinc finger protein 445
Details	300	59	hsa-miR-1178-3p	INVS	inversin
Details	301	59	hsa-miR-1178-3p	CSNK1G1	casein kinase 1 gamma 1
Details	302	59	hsa-miR-1178-3p	CERS6	ceramide synthase 6
Details	303	58	hsa-miR-1178-3p	GSK3B	glycogen synthase kinase 3 beta
Details	304	58	hsa-miR-1178-3p	FBXW11	F-box and WD repeat domain containing 11
Details	305	58	hsa-miR-1178-3p	PIDD1	p53-induced death domain protein 1
Details	306	58	hsa-miR-1178-3p	TMPRSS4	transmembrane serine protease 4
Details	307	58	hsa-miR-1178-3p	GPR55	G protein-coupled receptor 55
Details	308	58	hsa-miR-1178-3p	S100A4	S100 calcium binding protein A4
Details	309	58	hsa-miR-1178-3p	CASP2	caspase 2
Details	310	58	hsa-miR-1178-3p	LRP5L	LDL receptor related protein 5 like
Details	311	58	hsa-miR-1178-3p	ST6GAL1	ST6 beta-galactoside alpha-2,6-sialyltransferase 1
Details	312	58	hsa-miR-1178-3p	GAB2	GRB2 associated binding protein 2
Details	313	58	hsa-miR-1178-3p	TECPR2	tectonin beta-propeller repeat containing 2
Details	314	58	hsa-miR-1178-3p	CCDC92	coiled-coil domain containing 92
Details	315	58	hsa-miR-1178-3p	YWHAG	tyrosine 3-monooxygenase/tryptophan 5-monooxygenase activation protein gamma
Details	316	58	hsa-miR-1178-3p	SUN1	Sad1 and UNC84 domain containing 1
Details	317	58	hsa-miR-1178-3p	UBN2	ubinuclein 2
Details	318	57	hsa-miR-1178-3p	SELE	selectin E
Details	319	57	hsa-miR-1178-3p	EGFR	epidermal growth factor receptor
Details	320	57	hsa-miR-1178-3p	FXN	frataxin
Details	321	57	hsa-miR-1178-3p	KDM2A	lysine demethylase 2A
Details	322	57	hsa-miR-1178-3p	NSUN7	NOP2/Sun RNA methyltransferase family member 7
Details	323	57	hsa-miR-1178-3p	SREK1	splicing regulatory glutamic acid and lysine rich protein 1
Details	324	57	hsa-miR-1178-3p	RPTN	repetin
Details	325	57	hsa-miR-1178-3p	FNDC1	fibronectin type III domain containing 1
Details	326	57	hsa-miR-1178-3p	SOX5	SRY-box 5
Details	327	57	hsa-miR-1178-3p	SURF4	surfeit 4
Details	328	57	hsa-miR-1178-3p	TSHZ3	teashirt zinc finger homeobox 3
Details	329	57	hsa-miR-1178-3p	KAT8	lysine acetyltransferase 8
Details	330	57	hsa-miR-1178-3p	ATP8A1	ATPase phospholipid transporting 8A1
Details	331	56	hsa-miR-1178-3p	MARK1	microtubule affinity regulating kinase 1
Details	332	56	hsa-miR-1178-3p	FOXN2	forkhead box N2
Details	333	56	hsa-miR-1178-3p	C16orf82	chromosome 16 open reading frame 82
Details	334	56	hsa-miR-1178-3p	E2F1	E2F transcription factor 1
Details	335	56	hsa-miR-1178-3p	AHCYL1	adenosylhomocysteinase like 1
Details	336	56	hsa-miR-1178-3p	ZNF558	zinc finger protein 558
Details	337	56	hsa-miR-1178-3p	NODAL	nodal growth differentiation factor
Details	338	56	hsa-miR-1178-3p	VANGL2	VANGL planar cell polarity protein 2
Details	339	56	hsa-miR-1178-3p	RCC2	regulator of chromosome condensation 2
Details	340	56	hsa-miR-1178-3p	NRP2	neuropilin 2
Details	341	56	hsa-miR-1178-3p	ZNF618	zinc finger protein 618
Details	342	56	hsa-miR-1178-3p	KIF4B	kinesin family member 4B
Details	343	56	hsa-miR-1178-3p	NKAIN3	sodium/potassium transporting ATPase interacting 3
Details	344	56	hsa-miR-1178-3p	BCDIN3D	BCDIN3 domain containing RNA methyltransferase
Details	345	56	hsa-miR-1178-3p	SLC6A15	solute carrier family 6 member 15
Details	346	56	hsa-miR-1178-3p	TBCEL	tubulin folding cofactor E like
Details	347	56	hsa-miR-1178-3p	XK	X-linked Kx blood group
Details	348	56	hsa-miR-1178-3p	PTGFRN	prostaglandin F2 receptor inhibitor
Details	349	55	hsa-miR-1178-3p	GBP3	guanylate binding protein 3
Details	350	55	hsa-miR-1178-3p	STON2	stonin 2
Details	351	55	hsa-miR-1178-3p	EPB41L1	erythrocyte membrane protein band 4.1 like 1
Details	352	55	hsa-miR-1178-3p	FHL1	four and a half LIM domains 1
Details	353	55	hsa-miR-1178-3p	POFUT2	protein O-fucosyltransferase 2
Details	354	55	hsa-miR-1178-3p	LPAR5	lysophosphatidic acid receptor 5
Details	355	55	hsa-miR-1178-3p	KIAA0232	KIAA0232
Details	356	55	hsa-miR-1178-3p	JARID2	jumonji and AT-rich interaction domain containing 2
Details	357	55	hsa-miR-1178-3p	USP27X	ubiquitin specific peptidase 27 X-linked
Details	358	55	hsa-miR-1178-3p	SLC2A13	solute carrier family 2 member 13
Details	359	54	hsa-miR-1178-3p	CARNMT1	carnosine N-methyltransferase 1
Details	360	54	hsa-miR-1178-3p	C12orf49	chromosome 12 open reading frame 49
Details	361	54	hsa-miR-1178-3p	UBXN10	UBX domain protein 10
Details	362	54	hsa-miR-1178-3p	OAS2	2'-5'-oligoadenylate synthetase 2
Details	363	54	hsa-miR-1178-3p	SOS1	SOS Ras/Rac guanine nucleotide exchange factor 1
Details	364	54	hsa-miR-1178-3p	PRRG1	proline rich and Gla domain 1
Details	365	54	hsa-miR-1178-3p	SLC6A11	solute carrier family 6 member 11
Details	366	54	hsa-miR-1178-3p	TMEM101	transmembrane protein 101
Details	367	54	hsa-miR-1178-3p	ZNF311	zinc finger protein 311
Details	368	54	hsa-miR-1178-3p	CHL1	cell adhesion molecule L1 like
Details	369	54	hsa-miR-1178-3p	TLE3	TLE family member 3, transcriptional corepressor
Details	370	54	hsa-miR-1178-3p	KLF3	Kruppel like factor 3
Details	371	54	hsa-miR-1178-3p	STXBP4	syntaxin binding protein 4
Details	372	54	hsa-miR-1178-3p	ZNF782	zinc finger protein 782
Details	373	54	hsa-miR-1178-3p	TGM2	transglutaminase 2
Details	374	54	hsa-miR-1178-3p	ACOT11	acyl-CoA thioesterase 11
Details	375	54	hsa-miR-1178-3p	THUMPD1	THUMP domain containing 1
Details	376	54	hsa-miR-1178-3p	TDGF1	teratocarcinoma-derived growth factor 1
Details	377	54	hsa-miR-1178-3p	ISX	intestine specific homeobox
Details	378	54	hsa-miR-1178-3p	THEM4	thioesterase superfamily member 4
Details	379	54	hsa-miR-1178-3p	ST7	suppression of tumorigenicity 7
Details	380	54	hsa-miR-1178-3p	SRSF10	serine and arginine rich splicing factor 10
Details	381	54	hsa-miR-1178-3p	MITF	melanocyte inducing transcription factor
Details	382	54	hsa-miR-1178-3p	ST8SIA4	ST8 alpha-N-acetyl-neuraminide alpha-2,8-sialyltransferase 4
Details	383	54	hsa-miR-1178-3p	TMEM273	transmembrane protein 273
Details	384	54	hsa-miR-1178-3p	ABCA13	ATP binding cassette subfamily A member 13
Details	385	54	hsa-miR-1178-3p	ZNF786	zinc finger protein 786
Details	386	53	hsa-miR-1178-3p	MLPH	melanophilin
Details	387	53	hsa-miR-1178-3p	DNAH7	dynein axonemal heavy chain 7
Details	388	53	hsa-miR-1178-3p	LEMD2	LEM domain containing 2
Details	389	53	hsa-miR-1178-3p	NAV3	neuron navigator 3
Details	390	53	hsa-miR-1178-3p	SLC25A30	solute carrier family 25 member 30
Details	391	53	hsa-miR-1178-3p	OR2A4	olfactory receptor family 2 subfamily A member 4
Details	392	53	hsa-miR-1178-3p	GSAP	gamma-secretase activating protein
Details	393	53	hsa-miR-1178-3p	APOOL	apolipoprotein O like
Details	394	53	hsa-miR-1178-3p	EVI5	ecotropic viral integration site 5
Details	395	53	hsa-miR-1178-3p	USP7	ubiquitin specific peptidase 7
Details	396	53	hsa-miR-1178-3p	ATXN7L3B	ataxin 7 like 3B
Details	397	53	hsa-miR-1178-3p	PRLR	prolactin receptor
Details	398	53	hsa-miR-1178-3p	UCP3	uncoupling protein 3
Details	399	52	hsa-miR-1178-3p	FBXO28	F-box protein 28
Details	400	52	hsa-miR-1178-3p	LPP	LIM domain containing preferred translocation partner in lipoma
Details	401	52	hsa-miR-1178-3p	GSG1	germ cell associated 1
Details	402	52	hsa-miR-1178-3p	ACVR1B	activin A receptor type 1B
Details	403	52	hsa-miR-1178-3p	ATF2	activating transcription factor 2
Details	404	52	hsa-miR-1178-3p	SLC22A23	solute carrier family 22 member 23
Details	405	52	hsa-miR-1178-3p	PGM3	phosphoglucomutase 3
Details	406	52	hsa-miR-1178-3p	FEM1B	fem-1 homolog B
Details	407	52	hsa-miR-1178-3p	LSAMP	limbic system associated membrane protein
Details	408	52	hsa-miR-1178-3p	C5orf24	chromosome 5 open reading frame 24
Details	409	52	hsa-miR-1178-3p	TLR6	toll like receptor 6
Details	410	52	hsa-miR-1178-3p	DOCK4	dedicator of cytokinesis 4
Details	411	52	hsa-miR-1178-3p	CCDC96	coiled-coil domain containing 96
Details	412	52	hsa-miR-1178-3p	ANP32A	acidic nuclear phosphoprotein 32 family member A
Details	413	52	hsa-miR-1178-3p	ATP2B2	ATPase plasma membrane Ca2+ transporting 2
Details	414	51	hsa-miR-1178-3p	SEC14L3	SEC14 like lipid binding 3
Details	415	51	hsa-miR-1178-3p	MAP3K7	mitogen-activated protein kinase kinase kinase 7
Details	416	51	hsa-miR-1178-3p	MAPK1	mitogen-activated protein kinase 1
Details	417	51	hsa-miR-1178-3p	HNRNPA3	heterogeneous nuclear ribonucleoprotein A3
Details	418	51	hsa-miR-1178-3p	CCR2	C-C motif chemokine receptor 2
Details	419	51	hsa-miR-1178-3p	CDYL	chromodomain Y like
Details	420	51	hsa-miR-1178-3p	NRL	neural retina leucine zipper
Details	421	51	hsa-miR-1178-3p	DUSP8	dual specificity phosphatase 8
Details	422	51	hsa-miR-1178-3p	PAF1	PAF1 homolog, Paf1/RNA polymerase II complex component
Details	423	51	hsa-miR-1178-3p	TP53I11	tumor protein p53 inducible protein 11
Details	424	51	hsa-miR-1178-3p	REST	RE1 silencing transcription factor
Details	425	51	hsa-miR-1178-3p	TRIB3	tribbles pseudokinase 3
Details	426	51	hsa-miR-1178-3p	ZBTB4	zinc finger and BTB domain containing 4
Details	427	51	hsa-miR-1178-3p	FANCI	FA complementation group I
Details	428	50	hsa-miR-1178-3p	GLIPR2	GLI pathogenesis related 2
Details	429	50	hsa-miR-1178-3p	VANGL1	VANGL planar cell polarity protein 1
Details	430	50	hsa-miR-1178-3p	KDM4B	lysine demethylase 4B
Details	431	50	hsa-miR-1178-3p	IQCG	IQ motif containing G
Details	432	50	hsa-miR-1178-3p	EDNRA	endothelin receptor type A
Details	433	50	hsa-miR-1178-3p	CCR8	C-C motif chemokine receptor 8
Details	434	50	hsa-miR-1178-3p	GAB1	GRB2 associated binding protein 1
Details	435	50	hsa-miR-1178-3p	KLF8	Kruppel like factor 8
Details	436	50	hsa-miR-1178-3p	ST8SIA3	ST8 alpha-N-acetyl-neuraminide alpha-2,8-sialyltransferase 3
Details	437	50	hsa-miR-1178-3p	STAT3	signal transducer and activator of transcription 3
Details	438	50	hsa-miR-1178-3p	LAMB4	laminin subunit beta 4

## Sheet: miRWalk
mirnaid	refseqid	genesymbol	duplex	start	end	bindingp	energy	seed	accessibility	au	phylopstem	phylopflank	me	number_of_pairings	binding_region_length	longest_consecutive_pairings	position	validated	TargetScan	miRDB
hsa-miR-1178-3p	NM_001252385	TNIP1	..((((..((((((((.((((&)))).))))))))..)))).	386	406	0.923077	-20.2	1	0.00532601	0.382	0.483475	0.269889	-8.81432	16	20	8	CDS		0	0
hsa-miR-1178-3p	NM_001252386	TNIP1	((((((.((((((..((((((&)))).))..)))))))))))).	1072	1094	1	-22.1	1	0.000569967	0.382	1.49416	2.182	-7.07355	18	22	12	CDS		0	0
hsa-miR-1178-3p	NM_001252390	TNIP1	((((((.((((((..((((((&)))).))..)))))))))))).	1184	1206	0.846154	-22.1	1	0.000569967	0.382	4.40634	3.49463	-7.07355	18	22	12	CDS		0	0
hsa-miR-1178-3p	NM_001252390	TNIP1	..((((..((((((((.((((&)))).))))))))..)))).	326	346	0.846154	-20.2	1	0.00532601	0.382	0.646453	0.245013	-8.81432	16	20	8	CDS		0	0
hsa-miR-1178-3p	NM_001252391	TNIP1	((((((.((((((..((((((&)))).))..)))))))))))).	1171	1193	0.923077	-22.1	1	0.000569967	0.382	-0.660759	-0.0792907	-7.07355	18	22	12	CDS		0	0
hsa-miR-1178-3p	NM_001252391	TNIP1	..(((((((((.((((.....&)))).))))))))).	1	16	1	-20.3	1	0.0538529	0.378	0	0	-8.3038	13	15	9	5UTR		0	0
hsa-miR-1178-3p	NM_001252391	TNIP1	..((((..((((((((.((((&)))).))))))))..)))).	313	333	0.846154	-20.2	1	0.00532601	0.382	2.3519	0.878345	-8.81432	16	20	8	CDS		0	0
hsa-miR-1178-3p	NM_001252392	TNIP1	((((((.((((((..((((((&)))).))..)))))))))))).	1171	1193	0.923077	-22.1	1	0.000569967	0.382	1.63709	3.07769	-7.07355	18	22	12	CDS		0	0
hsa-miR-1178-3p	NM_001252392	TNIP1	..(((((((((.((((.....&)))).))))))))).	1	16	1	-20.3	1	0.0538529	0.378	0	0	-8.3038	13	15	9	5UTR		0	0
hsa-miR-1178-3p	NM_001252392	TNIP1	..((((..((((((((.((((&)))).))))))))..)))).	313	333	0.923077	-20.2	1	0.00532601	0.382	-0.322834	0.430293	-8.81432	16	20	8	CDS		0	0
hsa-miR-1178-3p	NM_001252393	TNIP1	((((((.((((((..((((((&)))).))..)))))))))))).	1244	1266	1	-22.1	1	0.000569967	0.382	0.364615	0.710585	-7.07355	18	22	12	CDS		0	0
hsa-miR-1178-3p	NM_001252393	TNIP1	..((((..((((((((.((((&)))).))))))))..)))).	386	406	0.923077	-20.2	1	0.00532601	0.382	2.57591	1.93437	-8.81432	16	20	8	CDS		0	0
hsa-miR-1178-3p	NM_001252402	TMEM249	(((((((((((((........&))))))))))))).	106	120	1	-19	1	1.91067e-07	0.265	0.365248	-0.330148	-5.76291	13	14	13	5UTR		0	0
hsa-miR-1178-3p	NM_001252404	TMEM249	(((((((((((((........&))))))))))))).	106	120	0.961538	-19	1	1.91067e-07	0.265	-0.419906	-0.859947	-5.76291	13	14	13	5UTR		0	0
hsa-miR-1178-3p	NM_001252406	ZBTB7B	..((((.((((((..((((((&)))))))))))))))).	629	646	1	-21.9	1	3.59808e-05	0.279	-0.080992	0.0888741	-8.09298	16	17	16	CDS		0	0
hsa-miR-1178-3p	NM_001252406	ZBTB7B	(((((((..((((((((((((&)))))))....)))))))))))).	159	183	0.846154	-21	1	0.000698104	0.368	-0.00974587	0.0340009	-7.3076	19	24	12	5UTR		0	0
hsa-miR-1178-3p	NM_001252499	RHNO1	.(((((.((..((((((((..&))))))))..)).))).)).	1662	1682	0.846154	-18.7	1	0.0728659	0.574	0	0	-9.40429	15	20	8	3UTR		0	0
hsa-miR-1178-3p	NM_001252500	RHNO1	.(((((.((..((((((((..&))))))))..)).))).)).	1620	1640	0.923077	-18.7	1	0.0728659	0.574	-0.161355	0.10265	-9.40429	15	20	8	3UTR		0	0
hsa-miR-1178-3p	NM_001252500	RHNO1	(((((((.....(((((((..&))))))).))))))).	779	795	0.846154	-18.1	1	1.52443e-05	0.471	2.05421	1.37148	-14.7217	14	16	7	CDS		0	0
hsa-miR-1178-3p	NM_001252507	C14orf132	...(((((((((((((((...&))))))))))).)))).	5050	5067	1	-24.7	1	0.000512697	0.529	-0.558943	-0.256601	-6.51454	15	17	11	3UTR		0	0
hsa-miR-1178-3p	NM_001252507	C14orf132	..(((((((((.(((((((..&)).)))))..))))))))).	3975	3995	1	-24	1	0.000151291	0.412	-0.181705	-0.23852	-8.3038	16	20	9	3UTR		0	0
hsa-miR-1178-3p	NM_001252511	SOAT1	(((((((((((((((((((..&))))))))..........)))).))).)))).	1964	1996	0.923077	-18.3	1	0.0234707	0.5	0.333531	0.0773331	-3.93757	19	32	8	3UTR		0	0
hsa-miR-1178-3p	NM_001252511	SOAT1	((((......(((((((((((&))))))))))).....)))).	2201	2222	0.846154	-16.3	1	0.234752	0.706	0.488617	0.339618	-16.1138	15	21	11	3UTR		0	0
hsa-miR-1178-3p	NM_001252512	SOAT1	(((((((((((((((((((..&))))))))..........)))).))).)))).	1897	1929	0.923077	-18.3	1	0.0234707	0.5	0.333531	0.0773331	-3.93757	19	32	8	3UTR		0	0
hsa-miR-1178-3p	NM_001252512	SOAT1	((((......(((((((((((&))))))))))).....)))).	2134	2155	0.846154	-16.3	1	0.234752	0.706	0.488617	0.339618	-16.1138	15	21	11	3UTR		0	0
hsa-miR-1178-3p	NM_001252597	CLPS	..(((((((((((((((((((&)))))......)))))))))))))).	205	231	0.865385	-27.3	1	0.000162976	0.471	2.84151	1.34744	-4.957	19	26	14	CDS		0	0
hsa-miR-1178-3p	NM_001252608	THBS3	...((((((((((((((((..&)))))..)))))..)))))).	1425	1446	1	-18.5	1	2.47886e-05	0.426	3.89923	3.75135	-6.51454	16	21	6	CDS		0	0
hsa-miR-1178-3p	NM_001252608	THBS3	(((.(((((.((((((((((.&)))))))))).).....))))))).	1328	1353	0.923077	-18.4	1	0.00639777	0.426	4.08269	3.6594	-8.2121	18	25	10	CDS		0	0
hsa-miR-1178-3p	NM_001252612	ZNF638	(((.(((((((((.(((((((&))))))).))....))))))).))).	4477	4503	0.923077	-21.4	1	0.075206	0.618	0.378057	0.699105	-7.82644	19	26	7	CDS		0	0
hsa-miR-1178-3p	NM_001252612	ZNF638	((.(((((.((((((((....&))))))))...))))).)).	4040	4060	1	-20	1	0.00400692	0.559	0.490864	1.6709	-6.5515	15	20	8	CDS		0	0
hsa-miR-1178-3p	NM_001252612	ZNF638	..(((((((.(((((((((((&)))))))))))..)).)).))).	5422	5445	0.923077	-19.4	1	0.00393927	0.515	3.02355	2.10729	-6.19951	18	23	11	CDS		0	0
hsa-miR-1178-3p	NM_001252617	LCN1	((((((((..(((.(((((..&))))).)))....)))))))).	444	466	0.846154	-19.9	1	0.00188574	0.368	0.54101	-0.442907	-7.09331	16	22	8	CDS		0	0
hsa-miR-1178-3p	NM_001252624	SLC8A1	.(((((.((((((((((((..&))))))))))))))...))).	5827	5848	0.923077	-20.8	1	2.15451e-05	0.515	0.406948	0.639642	-5.33701	17	21	14	3UTR		0	0
hsa-miR-1178-3p	NM_001252624	SLC8A1	.(.((((..((((((((((..&))))))))))..)))).).	1775	1794	1	-19.5	1	0.0374904	0.471	1.0468	1.54948	-8.72089	15	19	10	CDS		0	0
hsa-miR-1178-3p	NM_001252624	SLC8A1	.......((((((((((((..&)))))))))))).	18543	18556	0.846154	-19.1	0	0.0114829	0.662	6.21996	5.92976	-17.1102	12	13	12	3UTR		0	0
hsa-miR-1178-3p	NM_001252634	THRB	.((((((((((((.(((((((&))))))).))))))))...)))).	4901	4925	0.884615	-24.2	1	0.000769545	0.441	0.883937	0.356774	-4.65016	19	24	8	3UTR		0	0
hsa-miR-1178-3p	NM_001252634	THRB	(((((((((((((((((((..&)).))))))..))))))))))).	7495	7518	1	-22.8	1	0.000345426	0.515	0.99145	0.567018	-3.93757	19	23	11	3UTR		0	0
hsa-miR-1178-3p	NM_001252634	THRB	..(((.(((((((((((((..&.)))))....)))))))).))).	7394	7424	1	-21.2	1	0.0137331	0.5	1.33028	0.382966	-6.85796	16	23	8	3UTR		0	0
hsa-miR-1178-3p	NM_001252641	URI1	((((((((.((((((((....&.)))))))).).))))))).	629	659	0.923077	-17.1	1	0.00274687	0.574	3.86791	2.42759	-4.99396	16	20	8	CDS		0	0
hsa-miR-1178-3p	NM_001252650	RDH11	((((((.(.((((((((.(((&))).)))))))).).)))))).	1674	1696	0.846154	-19.5	1	0.00373451	0.588	6.30108	3.23709	-6.53765	18	22	8	3UTR		0	0
hsa-miR-1178-3p	NM_001252652	SLC1A2	.((.(((((((((((((((((&))))))).......)).)))))))).)).	1226	1255	1	-20.4	1	0.0123173	0.485	0.540939	0.355555	-6.82535	19	29	8	CDS		0	0
hsa-miR-1178-3p	NM_001252657	PP2D1	((((((((((((((((.....&))))))))).....))))))).	351	373	0.923077	-20.3	1	0.000100163	0.5	-0.541523	-0.190641	-3.93757	16	22	9	CDS		0	0
hsa-miR-1178-3p	NM_001252657	PP2D1	((((((.((.((..(((((..&.)))))..)).)).)))))).	145	171	0.923077	-19.4	1	0.0374168	0.515	2.55846	0.440658	-8.86974	15	21	6	5UTR		0	0
hsa-miR-1178-3p	NM_001252660	EPB41L2	(((((((((((((((((....&))))))).......)))))))))).	579	604	1	-23.3	1	0.000269288	0.529	1.36057	1.48401	-3.93757	17	25	10	CDS		0	0
hsa-miR-1178-3p	NM_001252660	EPB41L2	((((((.(((..(((((((..&))))))).))).)))))).	2278	2297	1	-21.8	1	0.000343499	0.397	5.83717	5.61448	-11.6528	16	19	7	CDS		0	0
hsa-miR-1178-3p	NM_001252668	GULP1	((.(((.((.(((((.(((((&)))))))))).)).))).)).	77	98	1	-16.3	1	0.405789	0.397	1.56119	0.830995	-8.51436	17	21	10	5UTR		0	0
hsa-miR-1178-3p	NM_001252669	GULP1	((.(((.((.(((((.(((((&)))))))))).)).))).)).	77	98	1	-16.3	1	0.405789	0.397	1.56119	0.830995	-8.51436	17	21	10	5UTR		0	0
hsa-miR-1178-3p	NM_001252677	ACSS1	..(((((((((((((((((..&.)))))))))....)))))))).	1972	2007	0.846154	-26.4	1	7.93028e-07	0.309	3.65322	3.62029	-4.957	17	23	9	3UTR		0	0
hsa-miR-1178-3p	NM_001253	CDC5L	..((.(.((((((((((....&)))))))))).))).	385	400	0.923077	-19.2	1	0.00317348	0.544	4.84221	6.0806	-10.6197	13	15	10	CDS		0	0
hsa-miR-1178-3p	NM_001253	CDC5L	..((((((((..((((((((.&)))))))).))))........)))).	4258	4284	0.846154	-19.2	1	0.0002324	0.544	0.0524307	-0.0114696	-11.1286	16	26	8	3UTR		0	0
hsa-miR-1178-3p	NM_001253379	RPL15	..(((((((.(((((((((((&)))))).)))))...))))))).	1902	1925	0.923077	-23	1	0.000329951	0.544	0.100295	-0.311304	-6.19951	18	23	7	3UTR		0	0
hsa-miR-1178-3p	NM_001253380	RPL15	..(((((((.(((((((((((&)))))).)))))...))))))).	2012	2035	0.923077	-23	1	0.000329951	0.544	0.100295	-0.311304	-6.19951	18	23	7	3UTR		0	0
hsa-miR-1178-3p	NM_001253382	RPL15	..(((((((.(((((((((((&)))))).)))))...))))))).	1458	1481	0.923077	-23	1	0.000329951	0.544	0.100295	-0.311304	-6.19951	18	23	7	3UTR		0	0
hsa-miR-1178-3p	NM_001253382	RPL15	..((((((.((..((((((..&))))))..)))))))).	682	699	0.846154	-18.3	1	1.38482e-06	0.382	6.28572	5.28003	-10.6493	14	17	8	CDS		0	0
hsa-miR-1178-3p	NM_001253383	RPL15	..(((((((.(((((((((((&)))))).)))))...))))))).	1368	1391	0.923077	-23	1	0.000329951	0.544	0.100295	-0.311304	-6.19951	18	23	7	3UTR		0	0
hsa-miR-1178-3p	NM_001253383	RPL15	..((((((.((..((((((..&))))))..)))))))).	592	609	0.846154	-18.3	1	1.38482e-06	0.382	6.28572	5.28003	-10.6493	14	17	8	CDS		0	0
hsa-miR-1178-3p	NM_001253384	RPL15	(((((((((((.(((((((..&)).))))).)))))))).))).	1020	1042	0.846154	-22.5	1	4.00326e-07	0.397	-0.360221	1.21441	-7.28438	18	22	8	CDS		0	0
hsa-miR-1178-3p	NM_001253387	CHL1	((((((.(((.(((((((...&)))))))...))))))))).	3532	3552	1	-21.4	1	0.00622422	0.588	2.09643	2.76952	-8.30604	16	20	9	CDS		0	1
hsa-miR-1178-3p	NM_001253387	CHL1	..((((((((.((((((((..&))))))))))))).))).	5875	5893	0.923077	-21.2	1	0.000599631	0.471	-0.06601	0.0563946	-7.78178	16	18	13	3UTR		0	1
hsa-miR-1178-3p	NM_001253388	CHL1	..((((((((.((((((((..&))))))))))))).))).	5383	5401	0.846154	-21.2	1	0.000599631	0.471	-0.434899	-0.290697	-7.78178	16	18	13	3UTR		0	1
hsa-miR-1178-3p	NM_001253676	TBPL1	..(((((((..(((((((...&.)))))))))))))).	3241	3273	1	-21.4	1	2.13639e-05	0.574	0	0	-9.02428	14	16	14	3UTR		0	0
hsa-miR-1178-3p	NM_001253693	MCOLN3	(((((.(((((..((((((((&)))))).............................))..))))).))))).	2298	2349	0.846154	-16	1	0.000305435	0.691	3.70078	3.13876	-10.4745	18	51	6	3UTR		0	0
hsa-miR-1178-3p	NM_001253693	MCOLN3	..((((..(((((((((....&))))))))).)))).	2084	2099	0.846154	-15.4	1	0.00270713	0.632	2.70344	2.08627	-8.81432	13	15	9	3UTR		0	0
hsa-miR-1178-3p	NM_001253697	ERBIN	((((.(((.(((((((((...&)))))))))...))))))).	5125	5145	0.923077	-19.8	1	0.000427938	0.603	0.348104	2.14932	-9.113	16	20	9	3UTR		0	0
hsa-miR-1178-3p	NM_001253698	ERBIN	((((.(((.(((((((((...&)))))))))...))))))).	4927	4947	0.923077	-19.8	1	0.000427938	0.603	0.348104	2.14932	-9.113	16	20	9	3UTR		0	0
hsa-miR-1178-3p	NM_001253699	ERBIN	((((.(((.(((((((((...&)))))))))...))))))).	5146	5166	0.923077	-19.8	1	0.000427938	0.603	0.348104	2.14932	-9.113	16	20	9	3UTR		0	0
hsa-miR-1178-3p	NM_001253701	ERBIN	((((.(((.(((((((((...&)))))))))...))))))).	4990	5010	0.923077	-19.8	1	0.000427938	0.603	0.348104	2.14932	-9.113	16	20	9	3UTR		0	0
hsa-miR-1178-3p	NM_001253723	DPYSL5	..(((((((((.(((((((..&))).))))...))))))))).	3853	3874	0.923077	-22.6	1	2.51324e-05	0.397	0.197672	0.0764559	-8.3038	16	21	9	3UTR		0	0
hsa-miR-1178-3p	NM_001253724	DPYSL5	..((((((((..(((((((..&))))))).)))))))).	272	289	0.923077	-23.4	1	4.80864e-05	0.324	4.87682	3.93654	-11.1286	15	17	8	5UTR		0	0
hsa-miR-1178-3p	NM_001253724	DPYSL5	..(((((((((.(((((((..&))).))))...))))))))).	3991	4012	0.846154	-22.6	1	2.51324e-05	0.397	-0.017329	0.302485	-8.3038	16	21	9	3UTR		0	0
hsa-miR-1178-3p	NM_001253725	KREMEN2	.((((((((((((.((((...&)).)).)))))).)))))).	741	761	0.846154	-18.5	1	1.63337e-05	0.309	2.76591	1.82479	-4.65016	16	20	6	CDS		0	0
hsa-miR-1178-3p	NM_001253726	KREMEN2	.((((((((((((.((((...&)).)).)))))).)))))).	741	761	0.846154	-18.5	1	1.63337e-05	0.309	2.76591	1.82479	-4.65016	16	20	6	CDS		0	0
hsa-miR-1178-3p	NM_001253775	CREB3L2	((((((.(((((((((.....&))))))))).)))))).	392	409	0.846154	-21	1	0.000113576	0.279	1.50926	2.31457	-5.48126	15	17	9	CDS		0	0
hsa-miR-1178-3p	NM_001253792	ZNF444	..((.((((((((((((((..&))))))))).))))))).	528	546	0.846154	-23.1	1	1.35218e-05	0.235	1.33805	0.87703	-9.07604	16	18	9	CDS		0	0
hsa-miR-1178-3p	NM_001253792	ZNF444	((((((((((((((((((...&))))))))))))...............)))))).	1882	1916	0.820513	-22.6	1	0.00792579	0.492	-0.273573	-0.782685	-3.93757	18	34	12	3UTR		0	0
hsa-miR-1178-3p	NM_001253799	ZNF331	((((((.((..((((((....&))))))..)).)))))).	4107	4125	0.846154	-19.4	1	0.0742713	0.588	-0.643854	-0.0899797	-9.54854	14	18	6	3UTR		0	0
hsa-miR-1178-3p	NM_001253800	ZNF331	.(((((((.((((((((....&.))))))))))))))).	85	115	1	-22.8	1	7.94804e-05	0.368	-0.220639	-0.13598	-4.84971	15	17	15	5UTR		0	0
hsa-miR-1178-3p	NM_001253800	ZNF331	((((((.((..((((((....&))))))..)).)))))).	3925	3943	0.846154	-19.4	1	0.0742713	0.588	-0.643854	-0.0899797	-9.54854	14	18	6	3UTR		0	0
hsa-miR-1178-3p	NM_001253801	ZNF331	((((((.((..((((((....&))))))..)).)))))).	3888	3906	0.846154	-19.4	1	0.0742713	0.588	-0.643854	-0.0899797	-9.54854	14	18	6	3UTR		0	0
hsa-miR-1178-3p	NM_001253801	ZNF331	((((((.((((((((......&)))))))))))))).	2065	2080	0.923077	-16.8	1	0.00226945	0.5	0.444539	-0.0899132	-5.71431	14	15	14	3UTR		0	0
hsa-miR-1178-3p	NM_001253815	SLC52A2	((((((..((((((((((...&.))).)))))))..)))))).	1623	1658	1	-21.9	1	0.0061424	0.353	0.415323	-0.095383	-7.7949	16	21	7	3UTR		0	0
hsa-miR-1178-3p	NM_001253816	SLC52A2	((((((..((((((((((...&.))).)))))))..)))))).	1640	1675	0.923077	-21.9	1	0.0061424	0.353	0	0	-7.7949	16	21	7	3UTR		0	0
hsa-miR-1178-3p	NM_001253826	GALNT14	..(((((((((...((((.((&)))))).))))))))).	2006	2023	0.901099	-18.2	1	0.00257587	0.412	2.11094	1.47477	-10.4498	15	17	9	CDS		0	0
hsa-miR-1178-3p	NM_001253827	GALNT14	..(((((((((...((((.((&)))))).))))))))).	2057	2074	0.824176	-18.2	1	0.00257587	0.412	-0.613792	-0.384256	-10.4498	15	17	9	CDS		0	0
hsa-miR-1178-3p	NM_001253829	PTPDC1	((((((.((((((((((....&)))).)))))))))))).	440	458	0.846154	-21.7	1	0.000326945	0.441	5.25406	4.67749	-5.48126	16	18	12	CDS		0	0
hsa-miR-1178-3p	NM_001253845	ADM2	..((.((((((((((((((..&)))))))))))))))).	1197	1214	1	-24.2	1	0.00313823	0.353	-0.516654	-0.408554	-9.07604	16	17	16	3UTR		0	0
hsa-miR-1178-3p	NM_001253845	ADM2	..(((((((((.(((((((..&.)).)))))..))))))))).	2867	2893	0.923077	-24.3	1	3.01905e-06	0.397	-0.118307	-0.0663464	-8.3038	16	21	9	3UTR		0	0
hsa-miR-1178-3p	NM_001253845	ADM2	..(((((((((.(((((((..&)).)))))..))))))))).	3051	3071	1	-23.6	1	0.000119487	0.397	-0.210684	-0.0538755	-8.3038	16	20	9	3UTR		0	0
hsa-miR-1178-3p	NM_001253846	GMDS	(((..((((((.(((((((((&)))))))))...))))))..))).	781	805	0.826923	-20.6	1	0.00175192	0.559	4.97273	5.70886	-14.4354	18	24	9	CDS		0	0
hsa-miR-1178-3p	NM_001253846	GMDS	.((((((..((((..(((...&)))..)))))))))).	143	159	0.807692	-16.6	1	5.55841e-05	0.529	0.224383	0.580088	-8.75564	13	16	10	CDS		0	0
hsa-miR-1178-3p	NM_001253849	VTCN1	..((((((((((((((((...&))))))))))).....))))).	331	353	0.846154	-21.3	1	0.00100931	0.515	-0.143289	0.198574	-4.957	16	22	11	5UTR		0	0
hsa-miR-1178-3p	NM_001253849	VTCN1	.(((((.((((((((((((((&))))))).....)))))))))....))).	1365	1394	1	-20	1	2.98101e-05	0.574	0.77885	0.139102	-5.33701	19	29	9	3UTR		0	0
hsa-miR-1178-3p	NM_001253850	VTCN1	.(((((.((((((((((((((&))))))).....)))))))))....))).	902	931	0.846154	-20	1	2.98101e-05	0.574	-0.376891	0.0415435	-5.33701	19	29	9	3UTR		0	0
hsa-miR-1178-3p	NM_001253852	AP4B1	..((((((.((((((......&)))))).)))))).	943	957	0.923077	-17.3	1	7.06495e-07	0.5	0.346662	1.80302	-6.24644	12	14	6	CDS		0	0
hsa-miR-1178-3p	NM_001253854	SPAG6	(((((((((((((..((((..&)))).))))))...................))))))).	1968	2006	0.923077	-19.7	1	0.00374591	0.618	2.40393	1.95416	-5.52986	17	38	7	CDS		0	0
hsa-miR-1178-3p	NM_001253854	SPAG6	.((((((((((.(((((....&.)))))..))))..)))))).	886	916	0.865385	-17.9	1	0.000235008	0.544	4.48321	4.12796	-7.14013	15	21	6	CDS		0	0
hsa-miR-1178-3p	NM_001253855	SPAG6	(((((((((((((..((((..&)))).))))))...................))))))).	1778	1816	0.923077	-19.7	1	0.00427327	0.618	2.88588	1.56821	-5.52986	17	38	7	3UTR		0	0
hsa-miR-1178-3p	NM_001253855	SPAG6	((((((((((((((((.....&)))))).)))))))))).	1648	1666	0.923077	-19.3	1	0.00813469	0.618	3.1889	4.53126	-3.93757	16	18	10	CDS		0	0
hsa-miR-1178-3p	NM_001253866	YME1L1	((((.((((.((((((((...&)))))))).)))))))).	1868	1886	1	-25.1	1	0.00790715	0.574	4.08658	3.1988	-9.29912	16	18	8	CDS		0	0
hsa-miR-1178-3p	NM_001253866	YME1L1	..(((((((((((((((((((&)))))....)))))..))))))))).	3052	3078	0.884615	-23.5	1	0.000833534	0.426	5.19077	5.38907	-4.957	19	26	9	3UTR		0	0
hsa-miR-1178-3p	NM_001253875	UXS1	((.((((((((((((((((((&)))))).))))))))..)))).)).	1959	1984	0.923077	-21	1	0.00350629	0.485	1.80872	1.74971	-5.49511	20	25	8	3UTR		0	0
hsa-miR-1178-3p	NM_001253875	UXS1	(((((((((((((((......&.))))))))))))))).	49	72	0.923077	-20.1	1	7.09359e-06	0.265	2.34428	2.45392	-4.17062	15	17	15	5UTR		0	0
hsa-miR-1178-3p	NM_001253876	UXS1	..(((((((((((((((((..&)))).))))...))))))))).	389	411	0.846154	-23.3	1	3.28617e-06	0.397	4.58822	2.90898	-4.957	17	22	9	5UTR		0	0
hsa-miR-1178-3p	NM_001253876	UXS1	..((.(((((((((((((...&)))))))....))))))..)).	110	132	0.923077	-20	1	0.000243223	0.5	4.2599	1.31941	-9.07604	15	22	7	5UTR		0	0
hsa-miR-1178-3p	NM_001253881	MED27	..((((((((((.........&)))))))))).	284	295	0.846154	-15.3	1	0.000105296	0.515	-0.218646	-0.55265	-8.07147	10	11	10	CDS		0	0
hsa-miR-1178-3p	NM_001253882	MED27	..((((((((((.........&)))))))))).	284	295	0.923077	-15.3	1	0.000105296	0.515	-0.403379	-0.16797	-8.07147	10	11	10	CDS		0	0
hsa-miR-1178-3p	NM_001253884	ALPK1	...((((((((((..((((..&.)))).)))))))))).	5006	5051	0.846154	-22.1	1	0.0348256	0.5	-0.177483	0.134206	-8.10683	14	17	10	3UTR		0	0
hsa-miR-1178-3p	NM_001253884	ALPK1	...(((.((((((((((((..&)))))).)))))).))).	2328	2346	1	-21.4	1	0.278287	0.471	-0.108827	0.166199	-8.05823	15	18	6	CDS		0	0
hsa-miR-1178-3p	NM_001253902	MEST	..((((.(..(((((((((..&)))))))))..))))).	62	79	0.846154	-20.5	1	0.000500524	0.309	0.059854	0.0439255	-8.79958	14	17	9	5UTR		0	0
hsa-miR-1178-3p	NM_001253912	TBC1D1	...((((((((((((((((..&))).))))..))))))))).	595	615	0.923077	-19.6	1	0.0163771	0.5	2.10729	2.92866	-6.51454	16	20	9	CDS		0	0
hsa-miR-1178-3p	NM_001254	CDC6	((.(((((((((((((((.((&)))))))))))).).)))).)).	1000	1023	1	-21.3	1	0.170512	0.515	2.26046	2.23108	-5.49511	19	23	12	CDS		0	0
hsa-miR-1178-3p	NM_001254	CDC6	..((((((((((((((((...&)))).)))))))..))))).	4327	4347	0.961538	-18	1	0.00464167	0.515	0.525933	0.624322	-4.957	16	20	7	3UTR		0	0
hsa-miR-1178-3p	NM_001254718	MYBPC1	(((((...(((((((((((((&))))))))))))).....))))).	227	251	0.846154	-24	1	0.0197092	0.471	0.519681	2.23108	-9.69585	18	24	13	CDS		0	0
hsa-miR-1178-3p	NM_001254718	MYBPC1	....(((((((((((((....&))))))))))))).	295	309	1	-22	1	0.0129526	0.603	1.4812	3.09749	-9.54656	13	14	13	CDS		0	0
hsa-miR-1178-3p	NM_001254719	MYBPC1	(((((...(((((((((((((&))))))))))))).....))))).	227	251	0.846154	-24	1	0.0197092	0.471	0.519681	2.23108	-9.69585	18	24	13	CDS		0	0
hsa-miR-1178-3p	NM_001254719	MYBPC1	....(((((((((((((....&))))))))))))).	295	309	1	-22	1	0.0129526	0.603	1.4812	3.09749	-9.54656	13	14	13	CDS		0	0
hsa-miR-1178-3p	NM_001254719	MYBPC1	..((.(((((((((((((...&))))))).................)))))))).	1781	1814	0.846154	-19.2	1	0.000296315	0.485	4.07387	3.90328	-9.07604	15	33	8	CDS		0	0
hsa-miR-1178-3p	NM_001254720	MYBPC1	(((((...(((((((((((((&))))))))))))).....))))).	191	215	0.846154	-24	1	0.0197092	0.471	0.519681	3.08077	-9.69585	18	24	13	CDS		0	0
hsa-miR-1178-3p	NM_001254720	MYBPC1	....(((((((((((((....&))))))))))))).	259	273	1	-22	1	0.0129526	0.603	1.4812	3.09749	-9.54656	13	14	13	CDS		0	0
hsa-miR-1178-3p	NM_001254720	MYBPC1	..((.(((((((((((((...&))))))).................)))))))).	1745	1778	0.846154	-19.2	1	0.000296315	0.485	4.07387	3.90328	-9.07604	15	33	8	CDS		0	0
hsa-miR-1178-3p	NM_001254721	MYBPC1	(((((...(((((((((((((&))))))))))))).....))))).	227	251	0.846154	-24	1	0.0197092	0.471	0.519681	2.23108	-9.69585	18	24	13	CDS		0	0
hsa-miR-1178-3p	NM_001254721	MYBPC1	....(((((((((((((....&))))))))))))).	295	309	1	-22	1	0.0129526	0.603	1.4812	3.09749	-9.54656	13	14	13	CDS		0	0
hsa-miR-1178-3p	NM_001254721	MYBPC1	..((.(((((((((((((...&))))))).................)))))))).	1724	1757	0.846154	-19.2	1	0.000296315	0.485	4.07387	3.90328	-9.07604	15	33	8	CDS		0	0
hsa-miR-1178-3p	NM_001254722	MYBPC1	(((((...(((((((((((((&))))))))))))).....))))).	149	173	0.923077	-24	1	0.0468598	0.471	3.25965	2.13767	-9.69585	18	24	13	CDS		0	0
hsa-miR-1178-3p	NM_001254722	MYBPC1	....(((((((((((((....&))))))))))))).	217	231	1	-22	1	0.0129526	0.603	1.4812	3.09749	-9.54656	13	14	13	CDS		0	0
hsa-miR-1178-3p	NM_001254722	MYBPC1	..((.(((((((((((((...&))))))).................)))))))).	1703	1736	0.846154	-19.2	1	0.000296315	0.485	4.07387	3.90328	-9.07604	15	33	8	CDS		0	0
hsa-miR-1178-3p	NM_001254723	MYBPC1	(((((...(((((((((((((&))))))))))))).....))))).	188	212	0.923077	-24	1	0.019707	0.471	1.38373	3.2823	-9.69585	18	24	13	CDS		0	0
hsa-miR-1178-3p	NM_001254723	MYBPC1	....(((((((((((((....&))))))))))))).	256	270	1	-22	1	0.0129526	0.603	1.4812	3.09749	-9.54656	13	14	13	CDS		0	0
hsa-miR-1178-3p	NM_001254723	MYBPC1	..((.(((((((((((((...&))))))).................)))))))).	1742	1775	0.846154	-19.2	1	0.000296315	0.485	4.07387	3.90328	-9.07604	15	33	8	CDS		0	0
hsa-miR-1178-3p	NM_001254726	AP4S1	..(((((((((((((((((((&.))))))))..))....))))))))).	1407	1457	0.846154	-25	1	4.3987e-07	0.426	-0.0818346	0.267917	-4.957	19	27	9	3UTR		0	0
hsa-miR-1178-3p	NM_001254727	AP4S1	..(((((((((((((((((((&.))))))))..))....))))))))).	1601	1651	0.846154	-25	1	4.3987e-07	0.426	-0.0818346	0.267917	-4.957	19	27	9	3UTR		0	0
hsa-miR-1178-3p	NM_001254728	AP4S1	((((((.((.(((((((((((&))))).)))))).)))))))).	473	495	1	-22	1	0.037775	0.485	-0.322365	-0.225688	-6.72377	19	22	8	5UTR		0	0
hsa-miR-1178-3p	NM_001254732	SPECC1L	..((((((((((((.((((((&.))))))....)))))))))))).	6242	6292	0.923077	-27.8	1	0.000537361	0.412	-1.5149	-0.622938	-5.69245	18	24	12	3UTR		0	0
hsa-miR-1178-3p	NM_001254732	SPECC1L	.((((((((.((.((((((..&)))))).)).)))))))).	5649	5668	1	-23.9	1	0.0015922	0.353	-0.166545	-0.513017	-6.32496	16	19	8	3UTR		0	0
hsa-miR-1178-3p	NM_001254734	TGM6	..((((.((((((((((((((&))).).))))))))))..)))).	31	54	1	-20.8	1	0.000764294	0.412	-0.267856	0.231809	-6.50069	18	23	10	5UTR		0	0
hsa-miR-1178-3p	NM_001254738	RND3	((.((((((((.((((((.((&)).)))))).)))))))).)).	48	70	0.846154	-24.2	1	0.000639848	0.441	6.04827	3.63684	-8.84192	18	22	8	5UTR		0	0
hsa-miR-1178-3p	NM_001254738	RND3	(((((.(((((((((.(((..&))).)))))))))))))).	1929	1948	0.846154	-19.3	1	0.221378	0.588	5.6453	5.15241	-6.07158	17	19	14	3UTR		0	0
hsa-miR-1178-3p	NM_001254748	RGS5	...(((.((.(((((((((..&))))))))).))..))).	4407	4425	0.923077	-19.2	1	0.254411	0.588	0.200716	-0.21256	-9.30073	14	18	9	3UTR		0	0
hsa-miR-1178-3p	NM_001254748	RGS5	.(((((.((((((((((((..&))))))))...)))).......))))).	97	125	0.846154	-18.7	1	0.0118537	0.544	0.673898	0.573992	-5.33701	17	28	8	5UTR		0	0
hsa-miR-1178-3p	NM_001254749	RGS5	...(((.((.(((((((((..&))))))))).))..))).	4333	4351	0.846154	-19.2	1	0.254411	0.588	0.0671177	-0.11447	-9.30073	14	18	9	3UTR		0	0
hsa-miR-1178-3p	NM_001254750	CD6	.((((.(((.(.(((((((((&))))))))).).))))))).	2498	2518	0.923077	-20.9	1	0.00331384	0.324	-0.173098	-0.333993	-10.2836	17	20	9	3UTR		0	0
hsa-miR-1178-3p	NM_001254751	CD6	.((((.(((.(.(((((((((&))))))))).).))))))).	2471	2491	0.923077	-20.9	1	0.00331384	0.324	-0.173098	-0.333993	-10.2836	17	20	9	3UTR		0	0
hsa-miR-1178-3p	NM_001254752	UQCRB	..(((..((((((((((((((&))))))))))))))..))).	5943	5963	0.934615	-26.5	1	0.00106705	0.515	-0.200096	-0.132408	-8.40165	17	20	14	3UTR		0	0
hsa-miR-1178-3p	NM_001254752	UQCRB	..(((((((((.(((((((..&)).)))))..))))))))).	1378	1398	1	-23.6	1	7.1472e-06	0.441	0.0595639	-0.263712	-8.3038	16	20	9	3UTR		0	0
hsa-miR-1178-3p	NM_001254753	ABHD14B	((((((.((((((((((((((&.))))))).....))))))).)))))).	285	326	0.923077	-23.8	1	0.0664952	0.397	0.0835592	-0.0103785	-5.48126	20	28	7	5UTR		0	0
hsa-miR-1178-3p	NM_001254759	ST3GAL4	.(((((((((((((((.....&.))))))))))))))).	191	228	1	-22.9	1	0.00947518	0.412	0.14994	-0.268275	-3.79332	15	17	15	5UTR		0	0
hsa-miR-1178-3p	NM_001254949	SMARCAD1	((((((.(((((.((((....&)))).))))))))))).	1313	1330	0.884615	-18.8	1	0.000238789	0.588	1.99168	3.07962	-6.77039	15	17	11	CDS		0	0
hsa-miR-1178-3p	NM_001254949	SMARCAD1	.((((...((.((((((((..&))))))))))..)))).	344	361	0.846154	-16.3	1	0.000320755	0.588	2.00183	2.41127	-12.3764	14	17	10	5UTR		0	0
hsa-miR-1178-3p	NM_001255	CDC20	.(((.((((((....(((((.&)))))..))))))))).	1436	1453	0.923077	-18	1	1.42134e-06	0.397	3.29131	4.51448	-14.1406	14	17	9	CDS		0	0
hsa-miR-1178-3p	NM_001255975	PIWIL3	((.(((.((((((((((((..&)).))))))))))))).)).	610	630	0.923077	-22.1	1	0.0991549	0.412	1.67508	3.39887	-7.0388	17	20	13	CDS		0	0
hsa-miR-1178-3p	NM_001255975	PIWIL3	((((((((((((((((((...&))))))))).........)))).)).))).	2295	2325	0.846154	-18.7	1	0.0358616	0.5	-0.50985	1.67006	-3.93757	18	30	9	CDS		0	0
hsa-miR-1178-3p	NM_001255976	PMEPA1	..(((((((.(((((((((..&))))))))).)))))..)).	3596	3616	1	-22.4	1	5.50527e-05	0.397	2.0553	-0.097765	-6.19951	16	20	9	3UTR		0	1
hsa-miR-1178-3p	NM_001255976	PMEPA1	..((((...((((((((((((&)))))))))))).)))).	4192	4210	0.846154	-21.9	1	1.23628e-06	0.471	3.09562	2.63618	-9.87071	16	18	12	3UTR		0	1
hsa-miR-1178-3p	NM_001255976	PMEPA1	.((((((((((((((((((..&))).))))))))...........))))))).	2610	2641	0.923077	-21.7	1	0.00658394	0.456	-0.0128615	0.146425	-3.79332	18	31	8	3UTR		0	1
hsa-miR-1178-3p	NM_001255978	CREB3L4	.(((((((((((((((((...&.))))))))..........))))))))).	1380	1422	0.846154	-23.3	1	6.54987e-05	0.412	0.199416	0.861309	-3.79332	17	29	9	CDS		0	0
hsa-miR-1178-3p	NM_001255979	CREB3L4	.(((((((((((((((((...&.))))))))..........))))))))).	1178	1220	0.846154	-23.3	1	6.54987e-05	0.412	0.199416	0.861309	-3.79332	17	29	9	CDS		0	0
hsa-miR-1178-3p	NM_001255981	CREB3L4	.(((((((((((((((((...&.))))))))..........))))))))).	1118	1160	0.846154	-23.3	1	6.54987e-05	0.412	0.199416	0.861309	-3.79332	17	29	9	CDS		0	0
hsa-miR-1178-3p	NM_001255983	COLEC11	..((((((((((((((.....&)))))))).)))))).	814	830	0.923077	-20.5	1	0.00140892	0.426	5.00593	4.10385	-4.957	14	16	8	CDS		0	0
hsa-miR-1178-3p	NM_001255985	COLEC11	..((((((((((((((.....&)))))))).)))))).	1056	1072	1	-20.5	1	0.00140892	0.426	3.86521	2.25019	-4.957	14	16	8	CDS		0	0
hsa-miR-1178-3p	NM_001255986	COLEC11	..((((((((((((((.....&)))))))).)))))).	865	881	1	-20.5	1	0.00140892	0.426	3.86521	2.25019	-4.957	14	16	8	CDS		0	0
hsa-miR-1178-3p	NM_001255987	COLEC11	..((((((((((((((.....&)))))))).)))))).	793	809	1	-20.5	1	0.00140892	0.426	3.86521	2.25019	-4.957	14	16	8	CDS		0	0
hsa-miR-1178-3p	NM_001255988	COLEC11	..((((((((((((((.....&)))))))).)))))).	793	809	1	-20.5	1	0.00140892	0.426	3.86521	2.25019	-4.957	14	16	8	CDS		0	0
hsa-miR-1178-3p	NM_001255989	COLEC11	..((((((((((((((.....&)))))))).)))))).	721	737	1	-20.5	1	0.00140892	0.426	3.86521	2.25019	-4.957	14	16	8	CDS		0	0
hsa-miR-1178-3p	NM_001256	CDC27	((.((((((.(.(((((((((&))).)))))).).)))))).)).	2820	2843	0.846154	-18.1	1	0.000376195	0.603	2.35993	2.73774	-10.0844	18	23	6	3UTR		0	0
hsa-miR-1178-3p	NM_001256006	SYT14	..((((.(((.((((((((..&)))))))).))).).))).	10254	10273	1	-19.5	1	0.00129058	0.588	0	0	-9.32546	15	19	8	3UTR		0	0
hsa-miR-1178-3p	NM_001256007	PNPLA8	..(((((((((.(((((....&.)))))..))))))))).	3655	3702	0.948718	-22.9	1	1.82217e-05	0.426	1.99577	1.76011	-8.3038	14	18	9	3UTR		0	0
hsa-miR-1178-3p	NM_001256007	PNPLA8	.(((((..((((((((((((.&))).)))))))))..))))).	1579	1600	1	-22.4	1	0.00945036	0.5	0.564389	0.767813	-7.65065	17	21	9	CDS		0	0
hsa-miR-1178-3p	NM_001256008	PNPLA8	..(((((((((.(((((....&.)))))..))))))))).	3609	3656	0.871795	-22.9	1	1.82217e-05	0.426	0.537006	0.685248	-8.3038	14	18	9	3UTR		0	0
hsa-miR-1178-3p	NM_001256008	PNPLA8	.(((((..((((((((((((.&))).)))))))))..))))).	1533	1554	0.923077	-22.4	1	0.00945036	0.5	-0.0945443	0.41689	-7.65065	17	21	9	CDS		0	0
hsa-miR-1178-3p	NM_001256009	PNPLA8	..(((((((((.(((((....&.)))))..))))))))).	3423	3470	0.871795	-22.9	1	1.82217e-05	0.426	0.537006	0.685248	-8.3038	14	18	9	3UTR		0	0
hsa-miR-1178-3p	NM_001256009	PNPLA8	.(((((..((((((((((((.&))).)))))))))..))))).	1533	1554	0.923077	-22.4	1	0.00945036	0.5	-0.0945443	0.41689	-7.65065	17	21	9	CDS		0	0
hsa-miR-1178-3p	NM_001256010	PNPLA8	..(((((((((.(((((....&.)))))..))))))))).	3482	3529	0.948718	-22.9	1	1.82217e-05	0.426	1.30536	1.67868	-8.3038	14	18	9	3UTR		0	0
hsa-miR-1178-3p	NM_001256010	PNPLA8	.(((((..((((((((((((.&))).)))))))))..))))).	1406	1427	1	-22.4	1	0.00945036	0.5	0.448107	0.566258	-7.65065	17	21	9	CDS		0	0
hsa-miR-1178-3p	NM_001256011	PNPLA8	..(((((((((.(((((....&.)))))..))))))))).	3543	3590	0.948718	-22.9	1	1.82217e-05	0.426	0.314293	0.234256	-8.3038	14	18	9	3UTR		0	0
hsa-miR-1178-3p	NM_001256011	PNPLA8	.(((((..((((((((((((.&))).)))))))))..))))).	1467	1488	0.923077	-22.4	1	0.00945036	0.5	0.215542	0.356603	-7.65065	17	21	9	CDS		0	0
hsa-miR-1178-3p	NM_001256012	MYH10	(((((((((((((((((((..&))).))))))))))......)))))).	4223	4250	0.820513	-24	1	0.000132193	0.412	3.92208	3.73007	-3.93757	19	27	10	CDS		0	1
hsa-miR-1178-3p	NM_001256012	MYH10	(((((((((((((((((....&.))))))))))..))))))).	5650	5693	0.826923	-24.5	1	2.79167e-06	0.412	4.02831	5.24602	-3.93757	17	21	10	CDS		0	1
hsa-miR-1178-3p	NM_001256014	PSMC3IP	(((((((((((((((((....&.))))))))))))))))).	76	125	1	-25.6	1	0.00925956	0.25	0.240218	0.100189	-3.93757	17	19	17	5UTR		0	0
hsa-miR-1178-3p	NM_001256017	GP6	..(((((((((.(((((((((&.))))).....))))..))))))))).	1696	1742	0.846154	-23.7	1	2.18509e-05	0.412	-0.864917	-0.0160589	-8.3038	18	27	9	3UTR		0	0
hsa-miR-1178-3p	NM_001256017	GP6	.(((.((..((((((((((..&))))))))))..))))).	1023	1041	0.923077	-19	1	0.0140803	0.382	-0.158807	-0.126323	-11.2824	15	18	10	3UTR		0	0
hsa-miR-1178-3p	NM_001256020	TRDN	(((((((((.((((((.....&.))))))))))).)))).	843	872	0.846154	-16	1	0.0769808	0.618	1.81186	1.71599	-5.18008	15	18	11	CDS		0	0
hsa-miR-1178-3p	NM_001256022	TRDN	..(((((((((((........&.))))))))))).	872	916	0.923077	-19.5	1	0.000331576	0.618	3.61388	3.72414	-6.78234	11	13	11	3UTR		0	0
hsa-miR-1178-3p	NM_001256024	ARHGAP22	(((((((((((((((((((..&.)))))))))))....................)))))))).	1083	1150	1	-25.6	1	0.00120317	0.471	1.62266	2.68052	-3.93757	19	41	11	CDS		0	0
hsa-miR-1178-3p	NM_001256025	ARHGAP22	(((((((((((((((((((..&.)))))))))))....................)))))))).	993	1060	1	-25.6	1	0.00120317	0.471	2.24328	3.12271	-3.93757	19	41	11	CDS		0	0
hsa-miR-1178-3p	NM_001256026	ARHGAP22	(((((((((((((((((((..&.)))))))))))....................)))))))).	648	715	0.923077	-25.6	1	0.00120317	0.471	0.888195	1.49895	-3.93757	19	41	11	CDS		0	0
hsa-miR-1178-3p	NM_001256041	MYO1A	..((((((((((..(((((((&))))))))))))))))).	1625	1643	1	-21.3	1	0.0102567	0.5	3.7459	4.45848	-7.10297	17	18	17	CDS		0	0
hsa-miR-1178-3p	NM_001256041	MYO1A	..(((((((((((((((((..&))).....))))))))))).))).	3736	3760	1	-20.8	1	0.000663146	0.426	-0.134311	0.0992193	-4.957	17	24	11	CDS		0	0
hsa-miR-1178-3p	NM_001256045	PIK3CB	.......((((((((((.(((&))).)))))))))).	3879	3894	0.846154	-17.6	0	0.000164422	0.574	4.81775	4.38672	-17.1102	13	15	10	3UTR		0	0
hsa-miR-1178-3p	NM_001256046	C19orf12	((((((.((((((((((((..&))))).))))))))))))).	2615	2635	1	-21.2	1	0.000308575	0.456	-0.153561	0.026819	-5.48126	18	20	13	3UTR		0	0
hsa-miR-1178-3p	NM_001256047	C19orf12	((((((.((((((((((((..&))))).))))))))))))).	2760	2780	1	-21.2	1	0.000308575	0.456	0.316375	-0.0618875	-5.48126	18	20	13	3UTR		0	0
hsa-miR-1178-3p	NM_001256053	ANKRD26	....(((((.(((((((((..&)))))))))))))).	1773	1788	0.923077	-19	1	0.142849	0.559	0.485686	1.02015	-10.7891	14	15	14	CDS		0	0
hsa-miR-1178-3p	NM_001256053	ANKRD26	((((((.(((..((((((...&))))))))))))))).	239	255	1	-19	1	1.03696e-05	0.162	-0.0295353	0.0615178	-11.6528	15	16	15	CDS		0	0
hsa-miR-1178-3p	NM_001256053	ANKRD26	(((((((((((...(((((((&))))))))))))..............)))))).	2599	2632	0.846154	-18	1	0.833584	0.691	2.07152	1.80072	-9.43035	18	33	12	CDS		0	0
hsa-miR-1178-3p	NM_001256053	ANKRD26	(((((((..(((((((.(((.&)))...)))))))....))))))).	5093	5118	0.807692	-17.7	1	0.0396524	0.603	1.10944	0.484736	-7.3076	17	25	7	CDS		0	0
hsa-miR-1178-3p	NM_001256063	CNTN1	((((((.((((((...(((..&))).)))))))))))).	131	148	0.923077	-19.3	1	0.000420606	0.441	1.08219	1.16592	-7.3066	15	17	12	5UTR		0	0
hsa-miR-1178-3p	NM_001256063	CNTN1	(((((((..((((((((....&)))))))).))))))).	2868	2885	0.846154	-18.7	1	0.00337541	0.632	0.590396	0.0620042	-7.3076	15	17	8	3UTR		0	0
hsa-miR-1178-3p	NM_001256064	CNTN1	(((((((..((((((((....&)))))))).))))))).	2832	2849	0.923077	-18.7	1	0.00337541	0.632	0.15633	-0.0744548	-7.3076	15	17	8	3UTR		0	0
hsa-miR-1178-3p	NM_001256064	CNTN1	..(((.((((.(((((((...&)))))))))))))).	1584	1599	0.923077	-17.3	1	0.00526806	0.632	2.99222	4.00888	-9.68273	14	15	14	CDS		0	0
hsa-miR-1178-3p	NM_001256071	RNF213	..(((((((((.(((((((((&))))).....))))..))))))))).	18469	18495	1	-23.4	1	1.22177e-05	0.441	0.18277	-0.0858384	-8.3038	18	26	9	3UTR		0	0
hsa-miR-1178-3p	NM_001256071	RNF213	..((((((.((((((((....&.)))))))).)))))).	11309	11331	0.923077	-20.6	1	1.57284e-05	0.471	3.93873	1.84369	-6.01339	14	17	8	CDS		0	0
hsa-miR-1178-3p	NM_001256074	COL25A1	(((((((((..((((((....&))))))))))))))).	1737	1753	0.846154	-21.3	1	0.0023363	0.309	2.98896	3.27868	-8.00486	15	16	15	CDS		0	0
hsa-miR-1178-3p	NM_001256080	KLK2	((((((((.(((((((((.((&)))))))).........))).)))))))).	1146	1176	0.807692	-20.7	1	0.0100964	0.441	-0.222071	-0.211305	-4.99396	19	30	8	3UTR	MIRT646534	0	0
hsa-miR-1178-3p	NM_001256095	MYH10	(((((((((((((((((....&))))))))))..))))))).	5607	5627	0.846154	-24.5	1	2.79167e-06	0.412	3.76782	5.27692	-3.93757	17	20	10	CDS		0	1
hsa-miR-1178-3p	NM_001256095	MYH10	(((((((((((((((((((..&))).))))))))))......)))))).	4157	4184	0.820513	-24	1	0.000132193	0.412	4.47913	3.35916	-3.93757	19	27	10	CDS		0	1
hsa-miR-1178-3p	NM_001256105	WNT5A	..((.(((..(((((((((..&)))))))))..))))).	2576	2593	1	-17.9	1	0.00616174	0.632	0.306596	0.258745	-11.3749	14	17	9	3UTR		0	0
hsa-miR-1178-3p	NM_001256109	CD101	((.(((.((..((((((((..&))))))))..))))).)).	3101	3120	0.923077	-20.3	1	0.0116055	0.471	0.314388	0.248556	-11.1061	15	19	8	CDS		0	0
hsa-miR-1178-3p	NM_001256109	CD101	..(((((((.(((((((.((.&)).)))))))))))))).	538	556	0.923077	-19.9	1	2.19565e-05	0.471	2.02134	2.26751	-6.19951	16	18	14	CDS		0	0
hsa-miR-1178-3p	NM_001256109	CD101	..((((.((((((((((.(((&))).))))))).))))))).	1959	1979	0.923077	-19.2	1	0.0360786	0.544	0.929869	0.799614	-6.50069	17	20	7	CDS		0	0
hsa-miR-1178-3p	NM_001256114	LHX8	..(((((((((((((((((..&.)))))))))....)))))))).	609	661	0.876923	-23.5	1	0.000376152	0.279	1.02632	1.76149	-4.957	17	23	9	CDS		0	0
hsa-miR-1178-3p	NM_001256119	NAA10	.(((((((.....((((((((&))))))))........))))))).	854	878	0.846154	-20.1	1	8.91581e-05	0.441	4.00487	3.09743	-13.5529	15	24	8	3UTR		0	0
hsa-miR-1178-3p	NM_001256119	NAA10	...(((((...(((((((...&)))))))..))))).	280	295	0.846154	-18.1	1	0.015566	0.5	-0.031811	-0.0668561	-11.6382	12	15	7	CDS		0	0
hsa-miR-1178-3p	NM_001256121	S100PBP	.((((((((((((((((((((&))))))))))..)))))))))).	494	517	0.923077	-28.6	1	0.0116617	0.529	0.0844296	0.987963	-3.79332	20	23	10	CDS		0	0
hsa-miR-1178-3p	NM_001256125	CHIT1	((((((((((....((((...&))))....)))))))))).	959	978	0.846154	-18.2	1	0.000149369	0.471	0.670705	0.883378	-12.2551	14	19	10	CDS		0	0
hsa-miR-1178-3p	NM_001256126	CERS6	((.(((..(((((((((((((&))))).......))))))))..))).)).	236	265	0.807692	-18.2	1	0.0028288	0.397	5.39629	4.56326	-9.35244	18	29	8	CDS		0	1
hsa-miR-1178-3p	NM_001256127	NSUN4	((((((((((..(((((((..&.))).)))).)))))))))).	2003	2036	0.923077	-23.8	1	1.05474e-05	0.485	0.475131	0.278461	-10.1092	17	21	10	3UTR		0	0
hsa-miR-1178-3p	NM_001256127	NSUN4	(((((((((((.(((((((..&))).....))))..))))))))))).	4138	4164	0.846154	-22	1	2.16385e-08	0.471	0.0312305	-0.0679606	-7.28438	18	26	11	3UTR		0	0
hsa-miR-1178-3p	NM_001256134	PROZ	((((((.(..(((((((((..&.)))))))))..).)))))).	1031	1067	0.846154	-22.5	1	1.01701e-06	0.368	-0.0725563	0.845547	-7.78016	16	21	9	CDS		0	0
hsa-miR-1178-3p	NM_001256135	CSE1L	.(((((((((((...((((..&.)))).......))))))))))).	2768	2801	0.846154	-18.7	1	0.000223805	0.441	4.76439	5.20884	-6.67474	15	24	11	CDS		0	0
hsa-miR-1178-3p	NM_001256139	CAPG	(((((((((((((((((((..&.))))).................)))))))))))))).	598	653	0.820513	-27.3	1	0.019228	0.338	2.43761	2.40851	-3.93757	19	38	14	CDS		0	0
hsa-miR-1178-3p	NM_001256141	FSBP	(((((((((((.(((((((((&)))))..)))).))))))).)))).	2819	2844	0.846154	-23.1	1	4.06987e-05	0.471	-0.16406	-0.113818	-7.28438	20	25	7	3UTR		0	0
hsa-miR-1178-3p	NM_001256154	ALOX5	.((((((((((...(((((..&.))))))))))))))).	1334	1363	0.846154	-21.8	1	2.62769e-05	0.368	5.43626	4.67242	-9.2861	15	17	15	CDS		0	0
hsa-miR-1178-3p	NM_001256155	ARMCX4	..((((((((((((.((((((&)))))).))).))))))))).	3140	3161	1	-27	1	0.00218591	0.382	0	0	-5.69245	18	21	9	CDS		0	0
hsa-miR-1178-3p	NM_001256155	ARMCX4	.((((((.(((((((((((((&)))))))))).))).)))))).	2180	2202	0.846154	-23.4	1	2.06384e-05	0.471	0	0	-6.10696	19	22	10	CDS		0	0
hsa-miR-1178-3p	NM_001256160	ATF7IP2	((((.(.(((.(((((((...&)))))))))).).)))).	1308	1326	1	-19.7	1	0.0088741	0.618	2.21668	1.73247	-12.4251	15	18	10	CDS		0	0
hsa-miR-1178-3p	NM_001256160	ATF7IP2	(((((((((((.((((.....&.)))).))))))).)))).	153	177	0.846154	-18.2	1	1.36922e-05	0.471	0.221284	0.0333241	-7.28438	15	19	7	5UTR		0	0
hsa-miR-1178-3p	NM_001256163	BIRC2	..(((..((((((((((....&))))))))))...))).	3113	3130	0.923077	-18.5	1	0.00160555	0.618	3.64837	3.02033	-8.40165	13	17	10	CDS		0	0
hsa-miR-1178-3p	NM_001256164	TMCO1	..(((.....(((((((((((&)))))))))))....))).	3094	3113	1	-19.4	1	0.0155302	0.618	0	0	-13.0142	14	19	11	3UTR		0	0
hsa-miR-1178-3p	NM_001256165	TMCO1	((((((.((((((((((((..&))))))................)))))))))))).	364	399	0.923077	-22.3	1	0.00166475	0.456	-0.295779	-0.0349988	-5.48126	18	35	12	5UTR		0	0
hsa-miR-1178-3p	NM_001256165	TMCO1	..(((.....(((((((((((&)))))))))))....))).	3396	3415	1	-19.4	1	0.0155302	0.618	0.16603	0.0999258	-13.0142	14	19	11	3UTR		0	0
hsa-miR-1178-3p	NM_001256166	BIRC2	..(((..((((((((((....&))))))))))...))).	1401	1418	0.923077	-18.5	1	0.00160555	0.618	3.64837	3.02033	-8.40165	13	17	10	CDS		0	0
hsa-miR-1178-3p	NM_001256167	ZNF620	..(((((((((.(((((((..&)))))))........))))))))).	2958	2983	0.846154	-23.5	1	0.000232281	0.382	0	0	-8.3038	16	25	9	3UTR		0	0
hsa-miR-1178-3p	NM_001256167	ZNF620	(((((((((...((((((...&))))))....))))))))).	2802	2822	0.923077	-22.8	1	0.000296155	0.456	0	0	-11.3517	15	20	9	3UTR		0	0
hsa-miR-1178-3p	NM_001256167	ZNF620	..(((((((((.(((((((..&)))..))))..))))))))).	1789	1810	0.846154	-21.7	1	2.98407e-05	0.426	-0.137419	-0.065504	-8.3038	16	21	9	3UTR		0	0
hsa-miR-1178-3p	NM_001256182	ANKRD11	...((((((((((((((((..&)))))))))))).)))).	3090	3108	1	-24.3	1	1.62314e-07	0.485	3.04971	2.47173	-6.51454	16	18	12	CDS		0	0
hsa-miR-1178-3p	NM_001256182	ANKRD11	((.((((((.((((((((...&)))))))))))))).)).	673	691	0.961538	-22.6	1	0.0134527	0.353	-0.0873362	0.626959	-6.73762	16	18	14	CDS		0	0
hsa-miR-1178-3p	NM_001256182	ANKRD11	..((((.((((((((((....&)))))))))))))).	8970	8985	0.923077	-22	1	1.43336e-08	0.338	-0.462052	-0.168697	-6.50069	14	15	14	3UTR		0	0
hsa-miR-1178-3p	NM_001256183	ANKRD11	...((((((((((((((((..&)))))))))))).)))).	3016	3034	1	-24.3	1	1.62314e-07	0.485	1.33748	1.98545	-6.51454	16	18	12	CDS		0	0
hsa-miR-1178-3p	NM_001256183	ANKRD11	((.((((((.((((((((...&)))))))))))))).)).	599	617	1	-22.6	1	0.0134527	0.353	-0.252939	0.0713659	-6.73762	16	18	14	CDS		0	0
hsa-miR-1178-3p	NM_001256183	ANKRD11	..((((.((((((((((....&)))))))))))))).	8896	8911	1	-22	1	1.43336e-08	0.338	2.42741	1.71761	-6.50069	14	15	14	3UTR		0	0
hsa-miR-1178-3p	NM_001256196	ARAF	((((((.((((((((((((..&))))))))............................))))...)))))).	909	959	0.923077	-19.8	1	0.00150313	0.426	1.74187	2.61374	-5.48126	18	50	8	CDS		0	0
hsa-miR-1178-3p	NM_001256197	ARAF	..((((....(((((((((((&)))))))))))..........)))).	689	715	0.923077	-19.1	1	0.00092599	0.515	1.99284	1.9778	-11.1132	15	26	11	3UTR		0	0
hsa-miR-1178-3p	NM_001256213	ATP1A3	..((((.((((((((((((..&.))).)))))))))..)))).	23	72	1	-24.1	1	0.0167947	0.412	1.75241	1.20438	-6.50069	16	21	9	5UTR		0	0
hsa-miR-1178-3p	NM_001256214	ATP1A3	((((((((((.((((((....&))))))))))...)))))).	2856	2876	1	-18.6	1	0.00148001	0.426	5.09417	4.3849	-6.76235	16	20	10	CDS		0	0
hsa-miR-1178-3p	NM_001256252	ADGRE1	((((((.((((((((((((((&))))))))))))...)))))))).	2761	2785	1	-24.2	1	0.000155113	0.441	-0.13348	-0.0626695	-5.48126	20	24	12	3UTR		0	0
hsa-miR-1178-3p	NM_001256252	ADGRE1	.((((((((((..((((((..&))))))..))))))).....))).	886	910	0.923077	-20.2	1	0.000120969	0.559	-0.210825	0.428246	-8.42926	16	24	7	CDS		0	0
hsa-miR-1178-3p	NM_001256253	ADGRE1	((((((.((((((((((((((&))))))))))))...)))))))).	2623	2647	1	-24.2	1	0.000155113	0.441	-0.13348	-0.0626695	-5.48126	20	24	12	3UTR		0	0
hsa-miR-1178-3p	NM_001256253	ADGRE1	..(((((((((.(((((((..&))))))).))).))).))).	332	352	1	-20.9	1	0.00149357	0.515	1.14367	0.52648	-8.3038	16	20	7	CDS		0	0
hsa-miR-1178-3p	NM_001256253	ADGRE1	.((((((((((..((((((..&))))))..))))))).....))).	1042	1066	0.923077	-20.2	1	0.000120969	0.559	-0.210825	0.428246	-8.42926	16	24	7	CDS		0	0
hsa-miR-1178-3p	NM_001256254	ADGRE1	((((((.((((((((((((((&))))))))))))...)))))))).	2395	2419	1	-24.2	1	0.000155113	0.441	-0.13348	-0.0626695	-5.48126	20	24	12	3UTR		0	0
hsa-miR-1178-3p	NM_001256254	ADGRE1	.((((((((((..((((((..&))))))..))))))).....))).	619	643	0.923077	-20.2	1	0.000120969	0.559	-0.210825	0.428246	-8.42926	16	24	7	CDS		0	0
hsa-miR-1178-3p	NM_001256255	ADGRE1	((((((.((((((((((((((&))))))))))))...)))))))).	2287	2311	1	-24.2	1	0.000155113	0.441	-0.13348	-0.0626695	-5.48126	20	24	12	3UTR		0	0
hsa-miR-1178-3p	NM_001256255	ADGRE1	..(((((((((.(((((((..&))))))).))).))).))).	332	352	1	-20.9	1	0.00149357	0.515	1.14367	0.52648	-8.3038	16	20	7	CDS		0	0
hsa-miR-1178-3p	NM_001256255	ADGRE1	.((((((((((..((((((..&))))))..))))))).....))).	511	535	0.923077	-20.2	1	0.000120969	0.559	-0.210825	0.428246	-8.42926	16	24	7	CDS		0	0
hsa-miR-1178-3p	NM_001256264	FLII	(((((((...((((((((...&)))))))).))))))).	2251	2268	0.846154	-20	1	0.000100102	0.382	3.61379	4.22221	-8.55011	15	17	8	CDS		0	0
hsa-miR-1178-3p	NM_001256265	FLII	.((((((((((((((((((..&))).)))))))................)))))))).	3290	3326	0.923077	-21.5	1	0.00281581	0.441	0	0	-3.79332	18	36	8	CDS		0	0
hsa-miR-1178-3p	NM_001256265	FLII	(((((((...((((((((...&)))))))).))))))).	1621	1638	0.923077	-20	1	0.000100102	0.382	0	0	-8.55011	15	17	8	CDS		0	0
hsa-miR-1178-3p	NM_001256267	MYPN	(((((((((((((((......&.))))))))))))))).	2541	2577	1	-24.2	1	3.77859e-06	0.515	0.911696	0.939988	-4.17062	15	17	15	CDS		0	0
hsa-miR-1178-3p	NM_001256268	MYPN	(((((((((((((((......&.))))))))))))))).	2785	2821	0.923077	-24.2	1	3.77859e-06	0.515	-0.147237	1.66598	-4.17062	15	17	15	CDS		0	0
hsa-miR-1178-3p	NM_001256270	KIF22	(((((.(((.(((((((((((&))).)))))))).)))....))))).	462	488	0.846154	-20.4	1	0.000304824	0.485	3.68081	3.26888	-7.08104	19	26	8	CDS		0	0
hsa-miR-1178-3p	NM_001256281	RAB34	((.(((((((...(((((((.&))))))).....))))))).)).	777	800	0.948718	-19.1	1	8.49312e-05	0.485	4.08779	4.37182	-12.9558	16	23	7	3UTR		0	0
hsa-miR-1178-3p	NM_001256301	HPGD	..(((((..(.((((((((..&)))))))))..))))).	191	208	0.923077	-19.7	1	3.58678e-06	0.368	-0.0633947	0.162038	-11.1518	14	17	9	5UTR		0	0
hsa-miR-1178-3p	NM_001256303	DTNB	(((((((((.....(((((..&)))))))))))))).	177	192	1	-19.8	1	0.00992669	0.397	0.303516	0.831538	-13.4976	14	15	14	5UTR		0	0
hsa-miR-1178-3p	NM_001256308	DTNB	..(((((((((((((((((..&))))))))))..............))))))).	2136	2168	0.846154	-22.8	1	4.38732e-06	0.309	-0.103285	0.12938	-4.957	17	32	10	3UTR		0	0
hsa-miR-1178-3p	NM_001256310	GLS	..((((((((((.((((....&)))).)))))))))).	2829	2845	0.846154	-20	1	0.000160505	0.647	0.601083	0.764017	-6.24613	14	16	10	3UTR		0	1
hsa-miR-1178-3p	NM_001256310	GLS	((((((.(((((((((((...&)))))))...............))))...)))))).	591	627	0.923077	-19	1	0.000661143	0.426	0.644149	1.46091	-5.48126	17	36	7	CDS		0	1
hsa-miR-1178-3p	NM_001256312	STK3	(((((((..(((((((.((((&)))).)))))))..))))))).	1297	1319	0.923077	-19	1	0.00131675	0.632	4.12024	4.17648	-7.3076	18	22	7	CDS		0	0
hsa-miR-1178-3p	NM_001256313	STK3	.(.(((((((((..((((...&.)).))..))))))))).).	898	928	0.923077	-18.9	1	0.103357	0.559	1.15887	0.951669	-7.49683	14	20	9	CDS		0	0
hsa-miR-1178-3p	NM_001256314	SLC5A1	..(((((((((.(((((((..&)))..))))..))))))))).	21	42	1	-21.3	1	0.00275171	0.441	-0.340027	0.145447	-8.3038	16	21	9	5UTR		0	0
hsa-miR-1178-3p	NM_001256314	SLC5A1	((.((((((.(((((((((..&))))))))).))..)))).)).	4511	4533	0.846154	-20.2	1	0.00926308	0.515	0.0119205	-0.193594	-6.73762	17	22	9	3UTR		0	0
hsa-miR-1178-3p	NM_001256316	CHST9	.((((((((((((((((((..&)))))..)))))))...)))))).	8718	8742	0.923077	-22.4	1	0.00010285	0.529	1.26324	2.04273	-3.79332	18	24	7	3UTR		0	0
hsa-miR-1178-3p	NM_001256316	CHST9	..(((((((.(((((((((..&))))))))))).))))).	6740	6758	0.846154	-21	1	0.000110164	0.456	0.489213	0.274332	-6.19951	16	18	11	3UTR		0	0
hsa-miR-1178-3p	NM_001256317	TMPRSS3	((((((((((((((((((...&))))))))).................))))))))).	462	498	0.820513	-20.4	1	0.000184013	0.353	-0.306313	-0.36825	-3.93757	18	36	9	CDS		0	0
hsa-miR-1178-3p	NM_001256317	TMPRSS3	..((.((((((.(((((((..&))))))).)))).))..)).	383	403	0.846154	-18.8	1	0.0037568	0.515	-0.722251	-0.219091	-12.4228	15	20	7	CDS		0	0
hsa-miR-1178-3p	NM_001256339	NKX3-1	...((((((..((((((((..&))))))))..)))))).	1037	1054	0.923077	-21.7	1	0.000335327	0.544	0.027819	-0.382418	-10.5818	14	17	8	3UTR		0	0
hsa-miR-1178-3p	NM_001256339	NKX3-1	((((((.(((((((((.((..&)).))).)))))).)))))).	2119	2140	0.846154	-19.5	1	0.0104032	0.544	-0.122362	-0.0609508	-5.48126	17	21	6	3UTR		0	0
hsa-miR-1178-3p	NM_001256358	PTK6	..(((((((((.(((((((..&))).))))...))))))))).	2335	2356	0.846154	-22.6	1	7.65707e-05	0.338	0.0857693	-0.0934818	-8.3038	16	21	9	3UTR		0	0
hsa-miR-1178-3p	NM_001256358	PTK6	((((.((((((((((((....&)))))))))))))))).	181	198	1	-21.4	1	0.00880492	0.309	0.0402782	-0.061256	-8.05661	16	17	16	CDS		0	0
hsa-miR-1178-3p	NM_001256369	CCR9	(((((((((((..((((.(((&.))).)))).))))))))))).	2269	2320	1	-23.1	1	0.0348379	0.471	0.180398	-0.359199	-8.57351	18	22	11	3UTR		0	0
hsa-miR-1178-3p	NM_001256370	SAMSN1	(((((((((.((((((.....&.))))))...))))))))).	574	628	0.923077	-16.4	1	0.226186	0.647	0.5241	-0.0914059	-5.18008	15	20	9	CDS		0	0
hsa-miR-1178-3p	NM_001256371	E2F8	((((((((((.((((((((((&)))))))))).)).)))...............))))).	1206	1244	0.923077	-19.6	1	0.00148693	0.647	2.40172	2.46717	-6.76235	20	38	10	CDS		0	0
hsa-miR-1178-3p	NM_001256372	E2F8	((((((((((.((((((((((&)))))))))).)).)))...............))))).	1151	1189	0.923077	-19.6	1	0.00148693	0.647	1.97425	3.02822	-6.76235	20	38	10	CDS		0	0
hsa-miR-1178-3p	NM_001256378	MCMBP	.(((((.(((((((((.....&))))))))).))))).	1132	1148	1	-18.8	1	0.000900494	0.456	0.0879172	-0.0182316	-5.33701	14	16	9	CDS		0	0
hsa-miR-1178-3p	NM_001256385	LRRC39	..(((.((((((((((((.((&.))))))))))).))).))).	371	402	1	-21.3	1	0.0010856	0.529	1.17093	1.4712	-6.85796	17	21	11	CDS		0	0
hsa-miR-1178-3p	NM_001256385	LRRC39	..((((((((.((((((((((&)))).))))))))).))).)).	1519	1541	0.923077	-18.1	1	0.0224908	0.735	2.82563	2.99918	-7.78178	18	22	9	3UTR		0	0
hsa-miR-1178-3p	NM_001256387	LRRC39	..(((.((((((((((((.((&.))))))))))).))).))).	314	345	0.923077	-21.3	1	0.0010856	0.529	4.23185	1.68269	-6.85796	17	21	11	CDS		0	0
hsa-miR-1178-3p	NM_001256387	LRRC39	..((((.....((((((((..&)))))))).....)))).	371	389	0.846154	-17	1	0.00470412	0.618	1.41898	1.49209	-13.938	12	18	8	CDS		0	0
hsa-miR-1178-3p	NM_001256394	NOL8	((((((((((((((((.((((&)))).))))))))).........))))))).	3583	3614	0.846154	-18.4	1	0.0798809	0.529	3.78475	2.32707	-3.93757	20	31	9	CDS		0	0
hsa-miR-1178-3p	NM_001256397	BCO2	(((.(((..((((((((((((&)))))))))))).))).))).	1179	1200	1	-21.7	1	0.00508972	0.515	2.78712	2.59058	-10.3396	18	21	12	CDS		0	0
hsa-miR-1178-3p	NM_001256397	BCO2	((((((.((.(((((((....&.))))))).)))))))).	1806	1843	1	-20.9	1	0.050431	0.5	-0.0212911	0.215392	-6.72377	15	18	8	3UTR		0	0
hsa-miR-1178-3p	NM_001256398	BCO2	(((.(((..((((((((((((&)))))))))))).))).))).	1045	1066	1	-21.7	1	0.00508972	0.515	2.78712	2.59058	-10.3396	18	21	12	CDS		0	0
hsa-miR-1178-3p	NM_001256398	BCO2	((((((.((.(((((((....&.))))))).)))))))).	1690	1727	1	-20.9	1	0.050431	0.5	-0.0212911	0.215392	-6.72377	15	18	8	3UTR		0	0
hsa-miR-1178-3p	NM_001256399	ELOVL1	..((((..(((((((((((((&))))).))))))))....)))).	1369	1392	0.923077	-18.9	1	0.000669052	0.426	0.325217	0.719027	-8.81432	17	23	8	3UTR		0	0
hsa-miR-1178-3p	NM_001256399	ELOVL1	..((((.((((((..((((..&)))).)))))))))).	1515	1531	0.923077	-18.6	1	2.87227e-05	0.368	0.665543	0.279082	-8.09298	14	16	10	3UTR		0	0
hsa-miR-1178-3p	NM_001256400	BCO2	(((.(((..((((((((((((&)))))))))))).))).))).	974	995	1	-21.7	1	0.00508972	0.515	2.78712	2.59058	-10.3396	18	21	12	CDS		0	0
hsa-miR-1178-3p	NM_001256400	BCO2	((((((.((.(((((((....&.))))))).)))))))).	1619	1656	1	-20.9	1	0.050431	0.5	-0.0212911	0.215392	-6.72377	15	18	8	3UTR		0	0
hsa-miR-1178-3p	NM_001256401	ELOVL1	..((((..(((((((((((((&))))).))))))))....)))).	1156	1179	0.948718	-18.9	1	0.000669052	0.426	4.01445	4.38143	-8.81432	17	23	8	3UTR		0	0
hsa-miR-1178-3p	NM_001256401	ELOVL1	..((((.((((((..((((..&)))).)))))))))).	1302	1318	0.923077	-18.6	1	2.87227e-05	0.368	-0.035437	0.739066	-8.09298	14	16	10	3UTR		0	0
hsa-miR-1178-3p	NM_001256401	ELOVL1	..(((((...((((((((...&))))))))))))).	509	523	0.923077	-18.2	1	1.50735e-06	0.441	0.79328	2.40061	-9.56953	13	14	13	CDS		0	0
hsa-miR-1178-3p	NM_001256403	PRELID3B	.((((...((((((((((((.&)))))))))))))))).	1584	1601	1	-22.6	1	0.0608282	0.426	0.044007	0.397421	-9.55161	16	17	16	3UTR		0	0
hsa-miR-1178-3p	NM_001256404	DENND2C	..(((((..((((((((((..&)))))..)))))))))).	5809	5827	0.846154	-18.5	1	0.000716305	0.603	0.195642	0.23952	-8.32703	15	18	10	3UTR		0	0
hsa-miR-1178-3p	NM_001256404	DENND2C	..((((.(((((((((((...&))))))....))))))))).	4166	4186	0.846154	-18.4	1	0.000947133	0.456	3.72512	2.73834	-6.50069	15	20	9	3UTR		0	0
hsa-miR-1178-3p	NM_001256404	DENND2C	(((((...(.(((((((((..&))))))))).).))))).	1905	1923	0.923077	-17.3	1	0.0921616	0.676	0.281543	0.25353	-10.9384	15	18	9	CDS		0	0
hsa-miR-1178-3p	NM_001256405	KDM2A	.(((((.((.(((((((((..&.))))))))).))))))).	3507	3545	0.980769	-25.7	1	0.0695633	0.338	0.631001	0.979517	-6.57952	16	19	9	3UTR		0	1
hsa-miR-1178-3p	NM_001256405	KDM2A	((.(((.((.(((((((((..&))))))))).))))).)).	1436	1455	0.923077	-22.1	1	0.662305	0.368	2.19592	2.8135	-8.28131	16	19	9	CDS		0	1
hsa-miR-1178-3p	NM_001256409	LRRC42	((((..(((((((.(((((..&)))))..))))))).)))).	221	241	1	-21.1	1	0.00789809	0.544	1.87372	1.45163	-10.8144	16	20	7	5UTR		0	0
hsa-miR-1178-3p	NM_001256409	LRRC42	((((((((((..(((((((((&))).))))))))))...)))))).	1258	1282	0.846154	-19.7	1	0.000858467	0.397	0.484859	1.09502	-10.1092	19	24	10	CDS		0	0
hsa-miR-1178-3p	NM_001256410	RAB18	.((((..((((((((((((..&)))))))))))).)))).	1166	1184	0.974359	-20.9	1	0.0118943	0.588	0.384572	0.917688	-7.23797	16	18	12	3UTR		0	0
hsa-miR-1178-3p	NM_001256412	RAB18	.((((..((((((((((((..&)))))))))))).)))).	887	905	0.974359	-20.9	1	0.0118943	0.588	0.384572	0.917688	-7.23797	16	18	12	3UTR		0	0
hsa-miR-1178-3p	NM_001256413	HVCN1	((((((.((.(((((((((..&.)).))))))).)))))))).	237	284	1	-22.3	1	0.0140918	0.412	0.198035	-0.0799161	-6.72377	17	21	8	CDS		0	0
hsa-miR-1178-3p	NM_001256414	GNAI1	(((((((((((((((((((..&))))).....)))))).....)))))))).	2158	2188	1	-20	1	0.00326701	0.662	0.648487	0.89948	-3.93757	19	30	8	3UTR		0	0
hsa-miR-1178-3p	NM_001256414	GNAI1	..(((((((((..(((((.((&)).)))))))))))))).	8859	8877	0.846154	-18.2	1	0.00515728	0.574	0.100436	-0.0961481	-9.59293	16	18	14	3UTR		0	0
hsa-miR-1178-3p	NM_001256414	GNAI1	..((((((((((((((.....&)))))))))))....))).	1444	1463	0.923077	-18.2	1	7.66036e-05	0.574	0.952406	0.617028	-4.957	14	19	11	3UTR		0	0
hsa-miR-1178-3p	NM_001256415	RAB18	.((((..((((((((((((..&)))))))))))).)))).	1007	1025	0.974359	-20.9	1	0.0118943	0.588	0.384572	0.917688	-7.23797	16	18	12	3UTR		0	0
hsa-miR-1178-3p	NM_001256416	NBPF3	..(((..((((.(((((((..&))))))).))))..))).	1083	1101	1	-20.5	1	0.0161645	0.485	0.491826	0.116179	-11.7484	14	18	7	CDS		0	0
hsa-miR-1178-3p	NM_001256416	NBPF3	..(((.(((((((((((((((&)))).))))))))).)).))).	1881	1903	0.923077	-20.2	1	0.00214942	0.603	-0.35181	-0.110308	-6.85796	18	22	9	CDS		0	0
hsa-miR-1178-3p	NM_001256416	NBPF3	.((((((((.((((..((((.&))))..)))).)))))))).	2316	2336	0.923077	-19.9	1	0.000135393	0.485	-0.00920512	-0.0541249	-6.00433	16	20	8	3UTR		0	0
hsa-miR-1178-3p	NM_001256417	NBPF3	..(((..((((.(((((((..&))))))).))))..))).	873	891	1	-20.5	1	0.0161645	0.485	0.491826	0.116179	-11.7484	14	18	7	CDS		0	0
hsa-miR-1178-3p	NM_001256417	NBPF3	..(((.(((((((((((((((&)))).))))))))).)).))).	1707	1729	0.923077	-20.2	1	0.00214942	0.603	-0.35181	-0.110308	-6.85796	18	22	9	CDS		0	0
hsa-miR-1178-3p	NM_001256417	NBPF3	.((((((((.((((..((((.&))))..)))).)))))))).	2142	2162	0.923077	-19.9	1	0.000135393	0.485	-0.00920512	-0.0541249	-6.00433	16	20	8	3UTR		0	0
hsa-miR-1178-3p	NM_001256418	ATPAF1	((((((..(((((.(((((..&))))))))))..)))))).	382	401	0.846154	-18.8	1	0.0290564	0.456	0.329245	0.342205	-8.65174	16	19	10	5UTR		0	0
hsa-miR-1178-3p	NM_001256418	ATPAF1	..(((((.((.((((((((..&)))))))).))))))).	666	683	0.923077	-17.9	1	0.0522125	0.588	0.342205	0.228487	-10.0954	15	17	8	CDS		0	0
hsa-miR-1178-3p	NM_001256418	ATPAF1	.((((((((((((((((....&))))).))).)))))).)).	282	302	0.846154	-17.4	1	0.000251913	0.529	0.69006	0.47925	-3.79332	16	20	6	5UTR		0	0
hsa-miR-1178-3p	NM_001256420	MAPRE2	((((((((((.(((((.....&))))))))))))))).	2	18	1	-21.7	1	0.000363633	0.298	0	0	-6.76235	15	16	15	5UTR		0	0
hsa-miR-1178-3p	NM_001256420	MAPRE2	.((((((((((((((((((..&)))))....))))).............)))))))).	3745	3781	0.846154	-19.2	1	0.00093871	0.588	1.99261	2.12964	-3.79332	18	36	8	3UTR		0	0
hsa-miR-1178-3p	NM_001256421	GPAT3	((((((.((((((((((((((&)))))..)))))))...)).)))))).	1421	1448	0.846154	-20.2	1	0.01138	0.515	5.53698	4.58235	-5.48126	20	27	7	CDS		0	0
hsa-miR-1178-3p	NM_001256422	GPAT3	..(((((((((((((((((..&))))))))))))...........................))))).	57	102	0.846154	-23	1	3.42256e-05	0.294	0.0707695	0.22575	-4.957	17	45	12	5UTR		0	0
hsa-miR-1178-3p	NM_001256422	GPAT3	((((((.((((((((((((((&)))))..)))))))...)).)))))).	1425	1452	0.846154	-20.2	1	0.01138	0.515	5.53698	4.58235	-5.48126	20	27	7	CDS		0	0
hsa-miR-1178-3p	NM_001256423	ARHGAP19	.(((.((((((((((((....&.))).)))))))))))).	2731	2781	1	-20.9	1	0.00405844	0.544	0.0923393	-0.013547	-7.91236	15	18	12	3UTR		0	0
hsa-miR-1178-3p	NM_001256423	ARHGAP19	((((((.(((((...((((..&))))....))))))))))).	4299	4319	0.923077	-19.1	1	0.00151751	0.529	2.83041	2.96377	-8.36268	15	20	11	3UTR		0	0
hsa-miR-1178-3p	NM_001256423	ARHGAP19	.((.(((((((((((((((((&)))).)))))).........))))))))).	4457	4487	0.846154	-19.1	1	0.00275556	0.441	2.81222	3.92657	-6.82535	19	30	9	3UTR		0	0
hsa-miR-1178-3p	NM_001256424	GUCY1A2	(((((((((((.((((((((.&))))))))...))))......))))))).	4545	4574	0.846154	-22.5	1	0.0033679	0.471	0.124397	0.00305065	-7.28438	19	29	8	3UTR		0	0
hsa-miR-1178-3p	NM_001256424	GUCY1A2	.((((((.(.(((((((((..&)))))).))).))))))).	13210	13229	0.846154	-20	1	0.124216	0.588	0.670652	0.964513	-7.34947	16	19	7	3UTR		0	0
hsa-miR-1178-3p	NM_001256424	GUCY1A2	(((((..((..((((((((..&))))))))....))..))))).	1447	1469	0.923077	-19.3	1	0.00963434	0.5	0.253282	-0.0185942	-11.4495	15	22	8	CDS		0	0
hsa-miR-1178-3p	NM_001256425	PDLIM5	..(((((((((((((((((..&))))).)))..))))))))).	2198	2219	0.846154	-23.8	1	1.78467e-05	0.412	0.111528	0.0205444	-4.957	17	21	9	3UTR		0	0
hsa-miR-1178-3p	NM_001256425	PDLIM5	..(((((((((.(((((....&)))))..))))))))).	2813	2830	0.923077	-23.3	1	0.00212982	0.485	0.190413	0.0874106	-8.3038	14	17	9	3UTR		0	0
hsa-miR-1178-3p	NM_001256426	PDLIM5	..(((((((((((((((((..&))))).)))..))))))))).	2704	2725	0.846154	-23.8	1	1.78467e-05	0.412	0.111528	0.0205444	-4.957	17	21	9	3UTR		0	0
hsa-miR-1178-3p	NM_001256426	PDLIM5	..(((((((((.(((((....&)))))..))))))))).	3319	3336	0.923077	-23.3	1	0.00212982	0.485	0.190413	0.0874106	-8.3038	14	17	9	3UTR		0	0
hsa-miR-1178-3p	NM_001256427	PDLIM5	((((((.((((((((((((((&)))))))....)))))))....)))))).	1808	1837	0.846154	-17.4	1	0.0716774	0.632	0.794493	0.722065	-5.48126	20	29	7	3UTR		0	0
hsa-miR-1178-3p	NM_001256430	STON2	.(((((.((((.(((((((..&))))))).))))..))))).	869	889	0.846154	-21.1	1	0.000415244	0.353	-0.472204	0.051577	-8.68381	16	20	7	CDS	MIRT666046	0	0
hsa-miR-1178-3p	NM_001256435	PCYT2	...((((.(((((((((((((&))))))))))))).)))).	3174	3193	0.826923	-24.8	1	0.0084303	0.294	-2.12701	-0.900281	-8.82818	17	19	13	3UTR		0	0
hsa-miR-1178-3p	NM_001256438	CABLES1	((((..(((.(((((((((..&))))))))))))..)))).	1545	1564	1	-20.2	1	0.00637117	0.515	-0.184617	0.247191	-11.2001	16	19	12	3UTR		0	0
hsa-miR-1178-3p	NM_001256441	C19orf47	..(((((((((.(((((((..&)).)))))..))))))))).	3520	3540	1	-24	1	8.83415e-07	0.382	0.59573	1.12623	-8.3038	16	20	9	3UTR		0	0
hsa-miR-1178-3p	NM_001256441	C19orf47	...(((((.((((((((((((&)))).)))))))).))))).	3035	3055	0.846154	-21.6	1	0.00110623	0.426	1.15578	3.04582	-7.57093	17	20	8	3UTR		0	0
hsa-miR-1178-3p	NM_001256442	PRRT2	.((((((((.(((((((((((&))))))..))))).)))))..))).	956	981	1	-21.7	1	0.000735686	0.382	1.16681	1.72626	-5.03583	19	25	6	CDS		0	0
hsa-miR-1178-3p	NM_001256442	PRRT2	.((((((((((....((((..&))))...)))))))))).	883	901	1	-21.5	1	0.00266712	0.397	1.27737	1.20307	-10.0215	14	18	10	CDS		0	0
hsa-miR-1178-3p	NM_001256443	PRRT2	.((((((((.(((((((((((&))))))..))))).)))))..))).	984	1009	1	-21.7	1	0.000735686	0.382	1.16681	1.72626	-5.03583	19	25	6	CDS		0	0
hsa-miR-1178-3p	NM_001256443	PRRT2	.((((((((((....((((..&))))...)))))))))).	911	929	1	-21.5	1	0.00266712	0.397	1.27737	1.20307	-10.0215	14	18	10	CDS		0	0
hsa-miR-1178-3p	NM_001256447	BCAP31	..((((.((((((((((((((&.)))).))))))..)))))))).	608	648	1	-20.7	1	0.00716863	0.471	2.03732	1.39568	-6.50069	18	23	8	CDS		0	0
hsa-miR-1178-3p	NM_001256449	GUCY1A1	((((((.((.(((((((((..&))))))))))).)))))).	164	183	0.846154	-21.8	1	5.72416e-05	0.471	0.733151	0.1925	-6.72377	17	19	11	5UTR		0	0
hsa-miR-1178-3p	NM_001256455	ZBTB7B	..((((.((((((..((((((&)))))))))))))))).	389	406	0.923077	-21.9	1	3.59808e-05	0.279	-0.334032	1.50954	-8.09298	16	17	16	CDS		0	0
hsa-miR-1178-3p	NM_001256468	KAT6B	...(((.((((((((((((..&)).))))))))))...))).	3828	3848	0.923077	-19.6	1	0.00183257	0.471	1.25019	3.04487	-8.05823	15	20	10	CDS		0	0
hsa-miR-1178-3p	NM_001256469	KAT6B	...(((.((((((((((((..&)).))))))))))...))).	3501	3521	0.846154	-19.6	1	0.00183257	0.471	0	0	-8.05823	15	20	10	CDS		0	0
hsa-miR-1178-3p	NM_001256469	KAT6B	....(((((((((((((((..&.)))).....................))))))))))).	2803	2848	0.846154	-19.3	1	0.0937703	0.426	0	0	-9.54656	15	38	11	CDS		0	0
hsa-miR-1178-3p	NM_001256469	KAT6B	(((((.(((..((((((((((&))))))))))))).))))).	7254	7274	0.846154	-19.3	1	0.00914293	0.662	0	0	-9.90581	18	20	13	3UTR		0	0
hsa-miR-1178-3p	NM_001256470	PLEKHA5	((((((.((((((((((((..&)))))))))...............)))..)))))).	1350	1386	0.846154	-18.1	1	0.00194484	0.574	3.4377	4.44755	-5.48126	18	36	9	CDS		0	0
hsa-miR-1178-3p	NM_001256470	PLEKHA5	(((((((..((((((((....&))))))))))))))).	2682	2698	1	-17.9	1	0.000136102	0.574	4.65356	3.3438	-7.3076	15	16	15	CDS		0	0
hsa-miR-1178-3p	NM_001256477	CMPK2	...((((((((((((((((..&))))))))).)))....)))).	1305	1327	1	-20	1	0.006976	0.485	2.00828	1.9588	-6.51454	16	22	9	CDS		0	0
hsa-miR-1178-3p	NM_001256486	GOLGB1	...(((((((..(((((((((&))))))))).............))))))).	1676	1706	0.923077	-21.8	1	0.00235655	0.544	0.686835	1.58482	-12.6861	16	30	9	CDS		0	0
hsa-miR-1178-3p	NM_001256486	GOLGB1	(((((....((((((((((..&))))))))))...))))).	3730	3749	1	-21.1	1	0.0412535	0.588	0.579649	2.06677	-10.7522	15	19	10	CDS		0	0
hsa-miR-1178-3p	NM_001256486	GOLGB1	((((((((((((((((((((.&)))).))))))...)))))).)))).	6757	6783	0.923077	-20.6	1	0.00539455	0.632	1.92009	1.4982	-3.93757	20	26	6	CDS		0	0
hsa-miR-1178-3p	NM_001256488	GOLGB1	...(((((((..(((((((((&))))))))).............))))))).	1581	1611	1	-21.8	1	0.00235655	0.544	2.37711	1.52762	-12.6861	16	30	9	CDS		0	0
hsa-miR-1178-3p	NM_001256488	GOLGB1	(((((....((((((((((..&))))))))))...))))).	3635	3654	0.876923	-21.1	1	0.0412535	0.588	3.74341	3.48693	-10.7522	15	19	10	CDS		0	0
hsa-miR-1178-3p	NM_001256488	GOLGB1	((((((((((((((((((((.&)))).))))))...)))))).)))).	6662	6688	1	-20.6	1	0.00539455	0.632	2.02918	1.99111	-3.93757	20	26	6	CDS		0	0
hsa-miR-1178-3p	NM_001256495	MAN2C1	((((((((..(((((((((..&)))))...))))..)))))))).	1616	1639	0.923077	-21.7	1	5.20422e-05	0.412	4.54059	3.25861	-6.23647	17	23	8	CDS		0	0
hsa-miR-1178-3p	NM_001256496	MAN2C1	((((((((..(((((((((..&)))))...))))..)))))))).	1319	1342	0.923077	-21.7	1	5.20422e-05	0.412	2.37042	2.43411	-6.23647	17	23	8	CDS		0	0
hsa-miR-1178-3p	NM_001256508	TBC1D10C	..(((((((((((((((((((&))))))))))))..)))).))).	52	75	1	-25.6	1	0.000139274	0.309	1.09736	1.90061	-4.957	19	23	12	CDS		0	0
hsa-miR-1178-3p	NM_001256511	SSBP1	..(((..((.(((((((((..&))))))))).))..))).	93	111	0.846154	-20.5	1	0.00271483	0.412	0.273987	-0.716781	-9.64415	14	18	9	5UTR		0	0
hsa-miR-1178-3p	NM_001256512	SSBP1	..(((..((.(((((((((..&))))))))).))..))).	93	111	0.846154	-20.5	1	0.00271483	0.412	0.273987	-0.716781	-9.64415	14	18	9	5UTR		0	0
hsa-miR-1178-3p	NM_001256513	SSBP1	..(((..((.(((((((((..&))))))))).))..))).	93	111	0.846154	-20.5	1	0.00271483	0.412	0.273987	-0.716781	-9.64415	14	18	9	5UTR		0	0
hsa-miR-1178-3p	NM_001256526	TMEM250	..(((((..((((((((((..&))))))))))..))))).	1753	1771	0.923077	-23.1	1	1.0295e-06	0.5	0.814064	-0.772742	-8.32703	15	18	10	3UTR		0	0
hsa-miR-1178-3p	NM_001256536	PRMT8	((((((.((((.((((((..(&.)..))))))..)))).)))))).	1181	1231	0.846154	-23.4	1	0.00112913	0.485	6.40534	3.57771	-8.82806	17	24	6	CDS		0	0
hsa-miR-1178-3p	NM_001256538	C20orf141	..(((..((((((((((((((&))))))))))).)))..))).	137	158	0.903846	-21.9	1	0.000330602	0.324	-0.276133	-0.0205625	-8.40165	17	21	11	CDS		0	0
hsa-miR-1178-3p	NM_001256540	NOP16	((((.((((.(((((((((..&.)))))))).....).)))))))).	418	461	0.846154	-20.7	1	0.0581777	0.515	3.70353	2.31167	-9.29912	17	25	8	CDS		0	0
hsa-miR-1178-3p	NM_001256540	NOP16	..(((..((((((((((((((&)))))))))))........))).))).	660	687	0.846154	-18.6	1	0.00148286	0.471	2.50955	2.59536	-8.40165	17	27	11	CDS		0	0
hsa-miR-1178-3p	NM_001256542	LIMS2	((((((.((((((((......&)))))))))))))).	1173	1188	0.923077	-18.1	1	1.732e-06	0.338	5.83567	6.06612	-5.71431	14	15	14	3UTR		0	0
hsa-miR-1178-3p	NM_001256542	LIMS2	..((((.((((((((.((...&.)).)))))))).)))).	162	198	0.846154	-19	1	8.47372e-06	0.368	-0.729103	-0.822045	-6.73374	14	18	8	5UTR		0	0
hsa-miR-1178-3p	NM_001256545	MEGF10	((((((((((..(((((((..&)))))))......)).)))))))).	1265	1290	0.846154	-20.6	1	0.000228896	0.412	4.02125	3.40453	-10.1092	17	25	8	CDS		0	0
hsa-miR-1178-3p	NM_001256549	PCGF5	..(((((((((.(((((((..&.)).)))))..))))))))).	5214	5247	1	-23.9	1	9.70187e-05	0.426	-0.472783	0.0933471	-8.3038	16	21	9	3UTR		0	0
hsa-miR-1178-3p	NM_001256549	PCGF5	....(((((((((((((((((&)))))))))).)))).))).	141	161	0.923077	-20.4	1	0.00564531	0.426	-0.169194	0.42632	-9.54656	17	20	10	5UTR		0	0
hsa-miR-1178-3p	NM_001256549	PCGF5	((((((((((..(((((((((&)))))))))...)))......................))))))).	6514	6559	1	-19.2	1	0.00141642	0.559	0.884752	1.78047	-10.1092	19	45	9	3UTR		0	0
hsa-miR-1178-3p	NM_001256550	MPP5	.((((((((((((((((....&))))))))))..............................)))))).	3034	3081	0.846154	-17.9	1	7.11965e-05	0.662	0.835658	1.03434	-3.79332	16	47	10	3UTR		0	0
hsa-miR-1178-3p	NM_001256560	DNASE1L3	..((((.((.(((((((((..&))))))))).)).)..))).	1204	1224	0.846154	-19.8	1	1.35365e-05	0.397	0	0	-7.74319	15	20	9	3UTR		0	0
hsa-miR-1178-3p	NM_001256566	F2RL2	((((((((((.((((((((..&))))))))...)))))).......)))).	3073	3102	0.923077	-20	1	0.0427191	0.632	0.41489	0.562787	-6.76235	18	29	8	3UTR		0	0
hsa-miR-1178-3p	NM_001256567	CHRNB4	..(((((((.((((((((((.&))))).))))).).)))))).	610	631	0.846154	-20.6	1	0.0170869	0.382	-0.143915	-0.322854	-6.19951	17	21	6	CDS		0	1
hsa-miR-1178-3p	NM_001256568	PPFIBP2	((((((.(((((((((((...&)).)))).)))))...)))))).	385	408	0.846154	-19.8	1	0.0738261	0.485	5.54879	4.18453	-5.48126	17	23	6	CDS		0	0
hsa-miR-1178-3p	NM_001256568	PPFIBP2	((((((..((((((((.((((&))))..))))))))..)))))).	50	73	0.846154	-19.6	1	0.00193275	0.397	0.826612	0.628029	-7.7949	18	23	8	5UTR		0	0
hsa-miR-1178-3p	NM_001256569	PPFIBP2	((((((.(((((((((((...&)).)))).)))))...)))))).	368	391	0.846154	-19.8	1	0.0738261	0.485	5.54879	4.18453	-5.48126	17	23	6	CDS		0	0
hsa-miR-1178-3p	NM_001256574	ENC1	(((((..(((((((((((...&))))))))))).....))))).	532	554	1	-22.5	1	0.0474832	0.632	1.38586	2.16444	-7.38222	16	22	11	5UTR		0	0
hsa-miR-1178-3p	NM_001256574	ENC1	...((((((..((((((((..&)))))))).)))))).	2524	2540	1	-20.1	1	0.0856326	0.485	1.76959	0.791456	-10.5818	14	16	8	3UTR		0	0
hsa-miR-1178-3p	NM_001256576	ENC1	...((((((..((((((((..&.)))))))).)))))).	2229	2267	0.923077	-20.5	1	0.0856326	0.485	3.37054	2.00405	-10.5818	14	17	8	3UTR		0	0
hsa-miR-1178-3p	NM_001256584	GYPC	..((((.(((((((((((...&))))))))))).........)))).	1744	1769	0.846154	-21.1	1	0.00157652	0.5	-0.254353	-0.16895	-6.50069	15	25	11	3UTR		0	0
hsa-miR-1178-3p	NM_001256584	GYPC	.(.(((.((((((((((((..&.))))))))))))..))).).	1442	1485	1	-24	1	0.00516482	0.368	3.66901	3.4485	-6.89455	16	21	12	3UTR		0	0
hsa-miR-1178-3p	NM_001256585	MGLL	.(((.((((((((((((((..&)))))....)))))))))))).	2084	2106	0.846154	-23.9	1	7.74831e-06	0.368	-0.360621	-0.400629	-7.91236	17	22	12	3UTR		0	0
hsa-miR-1178-3p	NM_001256585	MGLL	..((((.((((((((((((..&)))))))))))).))..)).	1093	1113	0.923077	-21.7	1	0.000190385	0.485	-0.487685	-0.322842	-6.50069	16	20	12	3UTR		0	0
hsa-miR-1178-3p	NM_001256608	GLMP	.((((((((((((........&)))))))))))).	212	225	1	-19.4	1	0.00021467	0.441	0.448746	-0.0664658	-5.61866	12	13	12	CDS		0	0
hsa-miR-1178-3p	NM_001256609	GLMP	..((.((((.(((.(((((((&))))))).))).)))))).	234	253	0.846154	-22.4	1	0.00096012	0.353	0.203765	-0.0709254	-11.1754	16	19	7	5UTR		0	0
hsa-miR-1178-3p	NM_001256609	GLMP	.(.((((((.(((((((((((&))))))))))).)........))))).).	133	162	0.897436	-21.8	1	0.000114502	0.382	-0.184616	-0.343156	-6.59337	18	29	11	5UTR		0	0
hsa-miR-1178-3p	NM_001256609	GLMP	.((((((((((((........&)))))))))))).	441	454	0.923077	-19.4	1	0.000215691	0.441	2.82682	1.61457	-5.61866	12	13	12	5UTR		0	0
hsa-miR-1178-3p	NM_001256620	R3HCC1L	.((((.((((((((((((((.&.)))))........))))))))).)))).	3023	3063	0.923077	-20.2	1	0.0282698	0.5	0.0840465	-0.0732226	-5.69428	18	29	9	3UTR		0	0
hsa-miR-1178-3p	NM_001256621	R3HCC1L	.((((.((((((((((((((.&)))))........))))))))).)))).	1232	1260	0.923077	-20.2	1	0.0282698	0.5	-0.741228	-0.000427444	-5.69428	18	28	9	3UTR		0	0
hsa-miR-1178-3p	NM_001256627	BRSK2	.(((((.((((((((((((..&)))))))))))).)).))).	362	382	1	-23.9	1	0.00176594	0.309	0.574665	0.315254	-5.33701	17	20	12	CDS		0	1
hsa-miR-1178-3p	NM_001256627	BRSK2	..((.(.((((((((((((..&)))))))))))).))).	3423	3440	0.923077	-22.3	1	1.70077e-06	0.338	1.95734	0.12755	-10.6197	15	17	12	3UTR		0	1
hsa-miR-1178-3p	NM_001256629	BRSK2	.(((((.((((((((((((..&)))))))))))).)).))).	362	382	1	-23.9	1	0.00176594	0.309	0.574665	0.315254	-5.33701	17	20	12	CDS		0	1
hsa-miR-1178-3p	NM_001256629	BRSK2	..((.(.((((((((((((..&)))))))))))).))).	3000	3017	0.923077	-22.3	1	1.70077e-06	0.338	1.95734	0.12755	-10.6197	15	17	12	3UTR		0	1
hsa-miR-1178-3p	NM_001256648	ZNF43	..((((((((..(((((((..&.)).)))))...)))))))).	4445	4471	0.846154	-21.6	1	3.58109e-05	0.5	0	0	-11.1286	15	21	8	3UTR		0	0
hsa-miR-1178-3p	NM_001256648	ZNF43	.(((.((((((.(((((((..&)))..)))).))))))))).	5278	5298	0.846154	-18.4	1	0.000424876	0.397	0	0	-11.2592	16	20	9	3UTR		0	0
hsa-miR-1178-3p	NM_001256649	ZNF43	.(((.((((((.(((((((..&)))..)))).))))))))).	5143	5163	0.923077	-18.4	1	0.000424876	0.397	0.101344	0.0986132	-11.2592	16	20	9	3UTR		0	0
hsa-miR-1178-3p	NM_001256650	ZNF43	..((((((((..(((((((..&.)).)))))...)))))))).	4182	4208	0.846154	-21.6	1	3.58109e-05	0.5	0	0	-11.1286	15	21	8	3UTR		0	0
hsa-miR-1178-3p	NM_001256650	ZNF43	.(((.((((((.(((((((..&)))..)))).))))))))).	5015	5035	0.846154	-18.4	1	0.000424876	0.397	0	0	-11.2592	16	20	9	3UTR		0	0
hsa-miR-1178-3p	NM_001256658	TEAD2	((((((.((((((((((((..&))))).....))))))))))))).	1714	1738	0.846154	-21.3	1	0.000144251	0.441	4.27433	4.17987	-5.48126	18	24	13	3UTR		0	0
hsa-miR-1178-3p	NM_001256658	TEAD2	((.((((((((((.(((....&.))).)))))))))).)).	110	158	0.923077	-21.3	1	0.0191756	0.309	0.301252	0.774015	-6.35195	15	19	10	CDS		0	0
hsa-miR-1178-3p	NM_001256658	TEAD2	((((((((.((((((((((((&))))))).))))).)))).)))).	1527	1551	0.846154	-21.1	1	0.04518	0.485	1.69362	1.92617	-4.99396	20	24	7	3UTR		0	0
hsa-miR-1178-3p	NM_001256659	TEAD2	((((((.((((((((((((..&))))).....))))))))))))).	1670	1694	1	-21.3	1	0.000144251	0.441	4.56472	3.17617	-5.48126	18	24	13	3UTR		0	0
hsa-miR-1178-3p	NM_001256659	TEAD2	((.((((((((((.(((....&.))).)))))))))).)).	66	114	0.923077	-21.3	1	0.0193953	0.309	0.16214	0.674028	-6.35195	15	19	10	CDS		0	0
hsa-miR-1178-3p	NM_001256659	TEAD2	((((((((.((((((((((((&))))))).))))).)))).)))).	1483	1507	0.846154	-21.1	1	0.04518	0.485	1.75892	1.8123	-4.99396	20	24	7	3UTR		0	0
hsa-miR-1178-3p	NM_001256660	TEAD2	((((((.((((((((((((..&))))).....))))))))))))).	1713	1737	0.846154	-21.3	1	0.000144251	0.441	2.68519	4.30868	-5.48126	18	24	13	3UTR		0	0
hsa-miR-1178-3p	NM_001256660	TEAD2	((.((((((((((.(((....&.))).)))))))))).)).	106	154	0.923077	-21.3	1	0.020108	0.309	0.449058	0.646858	-6.35195	15	19	10	CDS		0	0
hsa-miR-1178-3p	NM_001256660	TEAD2	((((((((.((((((((((((&))))))).))))).)))).)))).	1526	1550	0.846154	-21.1	1	0.04518	0.485	1.52738	1.82251	-4.99396	20	24	7	3UTR		0	0
hsa-miR-1178-3p	NM_001256661	TEAD2	((((((.((((((((((((..&))))).....))))))))))))).	1751	1775	0.846154	-21.3	1	0.000144251	0.441	2.76734	3.59842	-5.48126	18	24	13	3UTR		0	0
hsa-miR-1178-3p	NM_001256661	TEAD2	((.((((((((((.(((....&.))).)))))))))).)).	144	192	0.923077	-21.3	1	0.021103	0.309	1.04898	1.0142	-6.35195	15	19	10	CDS		0	0
hsa-miR-1178-3p	NM_001256661	TEAD2	((((((((.((((((((((((&))))))).))))).)))).)))).	1564	1588	0.846154	-21.1	1	0.04518	0.485	0.948173	1.83053	-4.99396	20	24	7	3UTR		0	0
hsa-miR-1178-3p	NM_001256662	TEAD2	((((((.((((((((((((..&))))).....))))))))))))).	1444	1468	1	-21.3	1	0.000144251	0.441	2.01672	2.69596	-5.48126	18	24	13	3UTR		0	0
hsa-miR-1178-3p	NM_001256662	TEAD2	..(((((((((...((((...&))))....))))))))).	1397	1415	0.923077	-19.1	1	1.16198e-05	0.5	2.94471	3.12562	-10.4498	13	18	9	3UTR		0	0
hsa-miR-1178-3p	NM_001256663	SLC47A2	.(((((.((((((((..((..&.))..)))))))).))))).	1477	1510	0.923077	-18.8	1	0.00320202	0.397	1.03684	1.22479	-5.57006	15	20	8	CDS		0	0
hsa-miR-1178-3p	NM_001256666	FAM193A	..(((((.((((((((((...&)))))).))))))))).	3420	3437	0.923077	-21	1	0.000352848	0.485	1.86189	1.65943	-7.27064	15	17	9	CDS		0	0
hsa-miR-1178-3p	NM_001256666	FAM193A	(((((..((((((((((....&)))))))))).))))).	3044	3061	0.923077	-19.2	1	0.00497903	0.324	3.80114	3.17556	-7.38222	15	17	10	CDS		0	0
hsa-miR-1178-3p	NM_001256667	FAM193A	..(((((.((((((((((...&)))))).))))))))).	3486	3503	0.923077	-21	1	0.000352848	0.485	1.86189	1.65943	-7.27064	15	17	9	CDS		0	0
hsa-miR-1178-3p	NM_001256667	FAM193A	(((((..((((((((((....&)))))))))).))))).	3110	3127	0.923077	-19.2	1	0.00497903	0.324	3.80114	3.17556	-7.38222	15	17	10	CDS		0	0
hsa-miR-1178-3p	NM_001256668	FAM193A	..(((((.((((((((((...&)))))).))))))))).	3420	3437	0.923077	-21	1	0.000352848	0.485	1.86189	1.65943	-7.27064	15	17	9	CDS		0	0
hsa-miR-1178-3p	NM_001256668	FAM193A	(((((..((((((((((....&)))))))))).))))).	3044	3061	0.923077	-19.2	1	0.00497903	0.324	3.80114	3.17556	-7.38222	15	17	10	CDS		0	0
hsa-miR-1178-3p	NM_001256670	DPP3	((((((.((.(((((((((((&))))))))))).)))))))).	2239	2260	0.923077	-27.1	1	0.00199603	0.397	-0.121485	0.401048	-6.72377	19	21	11	3UTR		0	0
hsa-miR-1178-3p	NM_001256674	STOML1	..(((((((.(...(((((((&)))))))...).))))))).	1861	1881	0.846154	-21.7	1	6.65371e-06	0.338	-0.125158	-0.0474482	-11.6923	15	20	7	3UTR		0	0
hsa-miR-1178-3p	NM_001256678	PRORP	.(((((....((((((((((.&))))))))))....))))).	4532	4552	0.846154	-21	1	0.000127428	0.441	0.0127197	0.00796151	-9.94954	15	20	10	3UTR		0	0
hsa-miR-1178-3p	NM_001256679	PRORP	.(((((....((((((((((.&))))))))))....))))).	4027	4047	0.846154	-21	1	0.000127428	0.441	0.0127197	0.00796151	-9.94954	15	20	10	3UTR		0	0
hsa-miR-1178-3p	NM_001256680	PRORP	.(((((....((((((((((.&))))))))))....))))).	3575	3595	0.846154	-21	1	0.000127428	0.441	0.0127197	0.00796151	-9.94954	15	20	10	3UTR		0	0
hsa-miR-1178-3p	NM_001256681	PRORP	.(((((....((((((((((.&))))))))))....))))).	3527	3547	0.846154	-21	1	0.000127428	0.441	0	0	-9.94954	15	20	10	3UTR		0	0
hsa-miR-1178-3p	NM_001256695	PRDM11	..(((..(((((((((((((.&))))))))))))).....))).	6354	6376	0.923077	-24.1	1	0.00025458	0.5	-0.346814	0.488498	-8.40165	16	22	13	3UTR		0	0
hsa-miR-1178-3p	NM_001256695	PRDM11	...((((((((((((((....&.)))))))))))))).	8783	8805	1	-23.8	1	0.00176899	0.5	1.57268	2.02158	-6.51454	14	16	14	3UTR		0	0
hsa-miR-1178-3p	NM_001256696	PRDM11	..((((((((((((.((((..&)))).)))....))))))))).	1644	1666	0.846154	-22.7	1	0.000614615	0.456	0.10677	1.3038	-5.69245	16	22	9	CDS		0	0
hsa-miR-1178-3p	NM_001256699	STPG3	(((((((((((((((((((..&))))....)))))))))))..)))).	420	446	0.846154	-21	1	9.99098e-08	0.324	-0.137158	-0.112482	-3.93757	19	26	11	CDS		0	0
hsa-miR-1178-3p	NM_001256699	STPG3	...(((.(((((((((((((.&))))))))))...)))))).	1	21	0.846154	-20.1	1	0.00337281	0.5	0	0	-8.05823	16	20	10	5UTR		0	0
hsa-miR-1178-3p	NM_001256700	STPG3	(((((((((((((((((((..&))))....)))))))))))..)))).	420	446	0.846154	-21	1	9.99098e-08	0.324	-0.137158	-0.112482	-3.93757	19	26	11	CDS		0	0
hsa-miR-1178-3p	NM_001256700	STPG3	...(((.(((((((((((((.&))))))))))...)))))).	1	21	0.846154	-20.1	1	0.00337281	0.5	0	0	-8.05823	16	20	10	5UTR		0	0
hsa-miR-1178-3p	NM_001256701	STPG3	(((((((((((((((((((..&))))....)))))))))))..)))).	420	446	0.846154	-21	1	9.99098e-08	0.324	-0.137158	-0.112482	-3.93757	19	26	11	CDS		0	0
hsa-miR-1178-3p	NM_001256701	STPG3	...(((.(((((((((((((.&))))))))))...)))))).	1	21	0.846154	-20.1	1	0.00337281	0.5	0	0	-8.05823	16	20	10	5UTR		0	0
hsa-miR-1178-3p	NM_001256702	USP3	.((((((((.(((((((....&.)))))))..)))))))).	5074	5116	1	-21.6	1	0.0204004	0.471	0.452023	-0.227638	-5.03583	15	19	8	3UTR		0	0
hsa-miR-1178-3p	NM_001256702	USP3	((((((.((((((((((((..&)))))))...))))))))))).	2265	2287	0.871795	-19.4	1	0.00780224	0.618	0.976168	0.601663	-5.48126	18	22	11	3UTR		0	0
hsa-miR-1178-3p	NM_001256714	DNAAF3	.((((..((((((((((....&)))))))))).)))).	1279	1295	0.846154	-19.6	1	0.0149495	0.25	1.36183	1.38936	-7.23797	14	16	10	CDS		0	0
hsa-miR-1178-3p	NM_001256715	DNAAF3	.((((..((((((((((....&)))))))))).)))).	1096	1112	0.846154	-19.6	1	0.0190548	0.25	0.990468	0.629645	-7.23797	14	16	10	CDS		0	0
hsa-miR-1178-3p	NM_001256720	CLEC19A	..((((((((((((((((((.&))).))))))))....))))))).	2378	2402	0.923077	-20	1	0.0657361	0.529	0.00563646	-0.0151771	-4.957	18	24	8	3UTR		0	0
hsa-miR-1178-3p	NM_001256720	CLEC19A	..(((((.((.(((((((...&))))))).))..))))).	1975	1993	0.846154	-19.6	1	0.000180928	0.471	-0.00320129	-0.111951	-10.0954	14	18	7	3UTR		0	0
hsa-miR-1178-3p	NM_001256725	USP39	((((((...((.((((((...&)))))).)))))))).	266	282	0.923077	-18.6	1	0.00638471	0.382	3.41093	3.0105	-12.1981	14	16	8	CDS		0	0
hsa-miR-1178-3p	NM_001256726	USP39	((((((...((.((((((...&)))))).)))))))).	266	282	0.923077	-18.6	1	0.00638471	0.382	3.41093	3.0105	-12.1981	14	16	8	CDS		0	0
hsa-miR-1178-3p	NM_001256732	SSBP2	..(((((((((.(((((((..&.)).)))))..))))))))).	4848	4894	0.923077	-23.9	1	4.05893e-06	0.397	0.549748	0.236903	-8.3038	16	21	9	3UTR		0	0
hsa-miR-1178-3p	NM_001256732	SSBP2	(((((((((...((((((.((&)).))))))....))))))))).	4697	4720	0.846154	-22.5	1	1.30312e-06	0.397	0.125969	0.117029	-11.3517	17	23	9	3UTR		0	0
hsa-miR-1178-3p	NM_001256733	SSBP2	..(((((((((.(((((((..&.)).)))))..))))))))).	4764	4810	0.923077	-23.9	1	4.05893e-06	0.397	0.175102	0.108387	-8.3038	16	21	9	3UTR		0	0
hsa-miR-1178-3p	NM_001256733	SSBP2	(((((((((...((((((.((&)).))))))....))))))))).	4613	4636	0.923077	-22.5	1	1.30312e-06	0.397	-0.162208	0.0966352	-11.3517	17	23	9	3UTR		0	0
hsa-miR-1178-3p	NM_001256734	SSBP2	..(((((((((.(((((((..&.)).)))))..))))))))).	4758	4804	0.846154	-23.9	1	4.05893e-06	0.397	-0.174976	0.100787	-8.3038	16	21	9	3UTR		0	0
hsa-miR-1178-3p	NM_001256734	SSBP2	(((((((((...((((((.((&)).))))))....))))))))).	4607	4630	0.846154	-22.5	1	1.30312e-06	0.397	0.0572013	-0.0267709	-11.3517	17	23	9	3UTR		0	0
hsa-miR-1178-3p	NM_001256735	SSBP2	..(((((((((.(((((((..&.)).)))))..))))))))).	4734	4780	0.923077	-23.9	1	4.05893e-06	0.397	0.469905	0.126352	-8.3038	16	21	9	3UTR		0	0
hsa-miR-1178-3p	NM_001256735	SSBP2	(((((((((...((((((.((&)).))))))....))))))))).	4583	4606	0.846154	-22.5	1	1.30312e-06	0.397	0.0507491	-0.0247546	-11.3517	17	23	9	3UTR		0	0
hsa-miR-1178-3p	NM_001256736	SSBP2	..(((((((((.(((((((..&.)).)))))..))))))))).	4635	4681	0.923077	-23.9	1	4.05893e-06	0.397	0	0	-8.3038	16	21	9	3UTR		0	0
hsa-miR-1178-3p	NM_001256736	SSBP2	(((((((((...((((((.((&)).))))))....))))))))).	4484	4507	0.923077	-22.5	1	1.30312e-06	0.397	0	0	-11.3517	17	23	9	3UTR		0	0
hsa-miR-1178-3p	NM_001256737	GDAP1L1	.((((((.(((((.((((((.&)))))).)))))...)))))).	1788	1810	1	-20.9	1	0.0106399	0.471	0.520007	0.41655	-6.9638	17	22	6	3UTR		0	0
hsa-miR-1178-3p	NM_001256737	GDAP1L1	..((((.(((((((((((...&))))))))))).)).)).	2111	2129	1	-20.3	1	3.53932e-06	0.338	0.175002	0.127381	-6.50069	15	18	11	3UTR		0	0
hsa-miR-1178-3p	NM_001256737	GDAP1L1	..((..(((((((((((....&))))))))))).)).	2254	2269	1	-19.4	1	4.9245e-05	0.559	1.66111	2.64464	-10.977	13	15	11	3UTR		0	0
hsa-miR-1178-3p	NM_001256738	GDAP1L1	.((((((.(((((.((((((.&)))))).)))))...)))))).	1628	1650	1	-20.9	1	0.0106399	0.471	1.06504	0.322684	-6.9638	17	22	6	3UTR		0	0
hsa-miR-1178-3p	NM_001256738	GDAP1L1	..((((.(((((((((((...&))))))))))).)).)).	1951	1969	0.923077	-20.3	1	3.53932e-06	0.338	-0.309471	0.262868	-6.50069	15	18	11	3UTR		0	0
hsa-miR-1178-3p	NM_001256738	GDAP1L1	..((..(((((((((((....&))))))))))).)).	2094	2109	0.923077	-19.4	1	4.9245e-05	0.559	2.78954	1.4391	-10.977	13	15	11	3UTR		0	0
hsa-miR-1178-3p	NM_001256739	GDAP1L1	.((((((.(((((.((((((.&)))))).)))))...)))))).	1557	1579	1	-20.9	1	0.0106399	0.471	1.06504	0.322684	-6.9638	17	22	6	3UTR		0	0
hsa-miR-1178-3p	NM_001256739	GDAP1L1	..((((.(((((((((((...&))))))))))).)).)).	1880	1898	0.923077	-20.3	1	3.53932e-06	0.338	-0.309471	0.262868	-6.50069	15	18	11	3UTR		0	0
hsa-miR-1178-3p	NM_001256739	GDAP1L1	..((..(((((((((((....&))))))))))).)).	2023	2038	0.923077	-19.4	1	4.9245e-05	0.559	2.78954	1.4391	-10.977	13	15	11	3UTR		0	0
hsa-miR-1178-3p	NM_001256740	GDAP1L1	.((((((.(((((.((((((.&)))))).)))))...)))))).	1518	1540	1	-20.9	1	0.0106399	0.471	0.520007	0.41655	-6.9638	17	22	6	3UTR		0	0
hsa-miR-1178-3p	NM_001256740	GDAP1L1	..((((.(((((((((((...&))))))))))).)).)).	1841	1859	1	-20.3	1	3.53932e-06	0.338	0.175002	0.127381	-6.50069	15	18	11	3UTR		0	0
hsa-miR-1178-3p	NM_001256740	GDAP1L1	..((..(((((((((((....&))))))))))).)).	1984	1999	1	-19.4	1	4.9245e-05	0.559	1.66111	2.64464	-10.977	13	15	11	3UTR		0	0
hsa-miR-1178-3p	NM_001256742	CNOT10	..(((....((((((((((..&)))))))))).....))).	2534	2553	0.846154	-16.9	1	0.0214193	0.603	0.302241	1.54798	-11.7717	13	19	10	3UTR		0	0
hsa-miR-1178-3p	NM_001256743	GRIA3	(((((((((.((((((((((.&.))))).....))))).))))))))).	101	143	1	-25.4	1	0.0824661	0.441	2.49941	1.32577	-5.18008	19	27	9	5UTR		0	0
hsa-miR-1178-3p	NM_001256743	GRIA3	(((((..((.(((((((((..&)).))))))).))..))))).	69	90	0.923077	-19.8	1	0.0547032	0.412	0.547016	1.28775	-8.62473	16	21	7	5UTR		0	0
hsa-miR-1178-3p	NM_001256748	SSUH2	.((((((((((((((((....&.))))))))))..................)))))).	791	841	0.923077	-21.4	1	0.000253434	0.456	1.94466	1.83537	-3.79332	16	36	10	CDS		0	0
hsa-miR-1178-3p	NM_001256750	PEX5L	..(((((((((.(((((((..&.)).)))))..))))))))).	5019	5052	0.923077	-23.9	1	1.40576e-06	0.397	0.11832	-0.0265168	-8.3038	16	21	9	3UTR		0	0
hsa-miR-1178-3p	NM_001256750	PEX5L	((.(((.((.((((((((((.&)))))))))).))))).)).	5608	5628	0.923077	-23.3	1	0.198229	0.485	-0.194991	0.336052	-8.28131	17	20	10	3UTR		0	0
hsa-miR-1178-3p	NM_001256751	PEX5L	..(((((((((.(((((((..&.)).)))))..))))))))).	4953	4986	0.846154	-23.9	1	1.40576e-06	0.397	0.0493097	-0.240797	-8.3038	16	21	9	3UTR		0	0
hsa-miR-1178-3p	NM_001256751	PEX5L	..((((.((.(((((((((..&))))))))).)))))).	7779	7796	0.807692	-20.3	1	0.00156056	0.559	4.73387	4.1523	-7.74319	15	17	9	3UTR		0	0
hsa-miR-1178-3p	NM_001256752	PEX5L	..(((((((((.(((((((..&.)).)))))..))))))))).	4920	4953	0.846154	-23.9	1	1.40576e-06	0.397	-0.43377	0.0581086	-8.3038	16	21	9	3UTR		0	0
hsa-miR-1178-3p	NM_001256753	PEX5L	..(((((((((.(((((((..&.)).)))))..))))))))).	4848	4881	0.923077	-23.9	1	1.40576e-06	0.397	-0.0404051	0.0472393	-8.3038	16	21	9	3UTR		0	0
hsa-miR-1178-3p	NM_001256753	PEX5L	((.(((.((.((((((((((.&)))))))))).))))).)).	5437	5457	0.846154	-23.3	1	0.198229	0.485	0.165248	0.153603	-8.28131	17	20	10	3UTR		0	0
hsa-miR-1178-3p	NM_001256753	PEX5L	..((((.((.(((((((((..&))))))))).)))))).	7674	7691	0.846154	-20.3	1	0.00156056	0.559	4.07831	4.7938	-7.74319	15	17	9	3UTR		0	0
hsa-miR-1178-3p	NM_001256754	PEX5L	..(((((((((.(((((((..&.)).)))))..))))))))).	4876	4909	0.923077	-23.9	1	1.40576e-06	0.397	0.118321	-0.0513608	-8.3038	16	21	9	3UTR		0	0
hsa-miR-1178-3p	NM_001256754	PEX5L	..((((.((.(((((((((..&))))))))).)))))).	7702	7719	0.807692	-20.3	1	0.00156056	0.559	4.80671	4.58408	-7.74319	15	17	9	3UTR		0	0
hsa-miR-1178-3p	NM_001256755	PEX5L	..(((((((((.(((((((..&.)).)))))..))))))))).	4681	4714	0.846154	-23.9	1	1.40576e-06	0.397	-0.000432778	-0.143921	-8.3038	16	21	9	3UTR		0	0
hsa-miR-1178-3p	NM_001256755	PEX5L	((.(((.((.((((((((((.&)))))))))).))))).)).	5270	5290	0.846154	-23.3	1	0.198229	0.485	0.457166	-0.154619	-8.28131	17	20	10	3UTR		0	0
hsa-miR-1178-3p	NM_001256755	PEX5L	..((((.((.(((((((((..&))))))))).)))))).	7507	7524	0.846154	-20.3	1	0.00156056	0.559	4.02667	4.26496	-7.74319	15	17	9	3UTR		0	0
hsa-miR-1178-3p	NM_001256756	PEX5L	..(((((((((.(((((((..&)).)))))..))))))))).	4784	4804	0.923077	-23.6	1	1.40576e-06	0.397	0.0286063	-0.0529135	-8.3038	16	20	9	3UTR		0	0
hsa-miR-1178-3p	NM_001256756	PEX5L	((.(((.((.((((((((((.&)))))))))).))))).)).	5360	5380	0.846154	-23.3	1	0.198229	0.485	0.134194	0.0868345	-8.28131	17	20	10	3UTR		0	0
hsa-miR-1178-3p	NM_001256756	PEX5L	..((((.((.(((((((((..&))))))))).)))))).	7597	7614	0.807692	-20.3	1	0.00156056	0.559	6.98534	5.01883	-7.74319	15	17	9	3UTR		0	0
hsa-miR-1178-3p	NM_001256758	RNF165	..(((((((((((((((((..&)))))...))))))))).))).	2082	2104	1	-24	1	0.00507927	0.441	0.645748	1.00299	-4.957	17	22	9	3UTR		0	0
hsa-miR-1178-3p	NM_001256758	RNF165	..((((((((.((((.(((((&))))).)))))))))))).	3505	3524	0.846154	-23.7	1	3.80981e-07	0.309	0.352712	0.373131	-8.01482	17	19	12	3UTR		0	0
hsa-miR-1178-3p	NM_001256758	RNF165	.((((((...(((((((((((&)))))))))))..)))))).	1863	1883	0.846154	-23.2	1	0.00214561	0.397	0.187711	0.4231	-8.40586	17	20	11	3UTR		0	0
hsa-miR-1178-3p	NM_001256758	RNF165	.((((((((((((((((((((&)))))).))))))))...............)))))).	3921	3958	0.923077	-23.2	1	0.00304316	0.353	1.88577	1.44368	-3.79332	20	37	8	3UTR		0	0
hsa-miR-1178-3p	NM_001256760	HTR2C	....((((((((((.(((((.&))))).))))))).))).	4179	4197	0.846154	-18.1	1	0.00973896	0.618	0	0	-10.282	15	18	7	3UTR		0	0
hsa-miR-1178-3p	NM_001256761	HTR2C	....((((((((((.(((((.&))))).))))))).))).	3993	4011	0.846154	-18.1	1	0.00973896	0.618	0	0	-10.282	15	18	7	3UTR		0	0
hsa-miR-1178-3p	NM_001256763	CYRIB	((((((.((((((((((....&)))))).)))))))))).	156	174	0.923077	-19.6	1	4.82181e-06	0.25	0.132039	0.201565	-5.48126	16	18	10	5UTR		0	0
hsa-miR-1178-3p	NM_001256763	CYRIB	(((((..((((((..((((..&))))))))))..))))).	2281	2299	0.846154	-19.1	1	0.00133364	0.5	3.11361	3.95116	-8.97451	15	18	10	3UTR		0	0
hsa-miR-1178-3p	NM_001256766	TMEM161A	..(((((((((((((.(((..&.))).))))))))))))).	205	245	1	-24.5	1	0.00307911	0.368	0.100732	-0.0438487	-5.19005	16	19	13	CDS		0	0
hsa-miR-1178-3p	NM_001256766	TMEM161A	((((((.((.((((((((...&)))))))).))..)))))).	1590	1610	0.846154	-24.2	1	0.0908879	0.324	1.87213	2.9227	-6.72377	16	20	8	3UTR		0	0
hsa-miR-1178-3p	NM_001256766	TMEM161A	..(((((((((.(((((((..&)).)))))..))))))))).	1874	1894	1	-23.6	1	4.17675e-06	0.397	2.74941	2.00157	-8.3038	16	20	9	3UTR		0	0
hsa-miR-1178-3p	NM_001256782	SEPTIN4	(((((((..(((((((.....&)))))))))))))).	283	298	0.923077	-17.1	1	0.0132988	0.5	0.789877	4.16964	-7.3076	14	15	14	CDS		0	0
hsa-miR-1178-3p	NM_001256787	PLEKHA5	((((((.((((((((((((..&)))))))))...............)))..)))))).	1182	1218	0.923077	-18.1	1	0.00194484	0.574	3.57486	3.5377	-5.48126	18	36	9	CDS		0	0
hsa-miR-1178-3p	NM_001256787	PLEKHA5	(((((((..((((((((....&))))))))))))))).	2304	2320	1	-17.9	1	0.000136102	0.574	3.50685	3.11422	-7.3076	15	16	15	CDS		0	0
hsa-miR-1178-3p	NM_001256789	CACNA1F	((((((((.((.(((((((..&)).)))))..)).)))))))).	4722	4744	0.923077	-20.2	1	1.98575e-05	0.441	3.31037	2.83087	-8.34077	17	22	8	CDS		0	0
hsa-miR-1178-3p	NM_001256790	CACNA1F	((((((.((.(((((((((..&)).))))))).)))))))).	4758	4778	1	-22	1	0.404694	0.441	1.32071	2.52201	-6.72377	17	20	8	CDS		0	0
hsa-miR-1178-3p	NM_001256792	BMPR1B	.((((.(((.((((((((((.&)))).)))))).))).)))).	2071	2092	0.923077	-19.2	1	0.0449341	0.574	0.842549	0.68298	-6.93679	17	21	6	CDS		0	0
hsa-miR-1178-3p	NM_001256792	BMPR1B	((((((((((((((.((....&)).))))))))))............)))).	1928	1958	0.923077	-18.6	1	0.00079748	0.485	3.50542	1.59948	-4.67302	16	30	10	CDS		0	0
hsa-miR-1178-3p	NM_001256792	BMPR1B	(((((.((((((((((((...&))))......)))))))).))))).	3289	3314	0.923077	-18.8	1	0.000365485	0.515	0.302747	0.128938	-5.83853	17	25	8	3UTR		0	0
hsa-miR-1178-3p	NM_001256793	BMPR1B	.((((.(((.((((((((((.&)))).)))))).))).)))).	1622	1643	0.923077	-19.2	1	0.0449341	0.574	0.698001	2.84264	-6.93679	17	21	6	CDS		0	0
hsa-miR-1178-3p	NM_001256793	BMPR1B	(((((((..(((.((((((..&)))))).))).))))))).	1765	1784	0.846154	-18.8	1	1.34102e-06	0.426	0.938111	0.298197	-8.59673	16	19	7	3UTR		0	0
hsa-miR-1178-3p	NM_001256793	BMPR1B	(((((.((((((((((((...&))))......)))))))).))))).	2840	2865	0.923077	-18.8	1	0.000365485	0.515	0.320042	0.346159	-5.83853	17	25	8	3UTR		0	0
hsa-miR-1178-3p	NM_001256794	BMPR1B	.((((.(((.((((((((((.&)))).)))))).))).)))).	1663	1684	0.923077	-19.2	1	0.0449341	0.574	0.698001	2.84264	-6.93679	17	21	6	CDS		0	0
hsa-miR-1178-3p	NM_001256794	BMPR1B	(((((((..(((.((((((..&)))))).))).))))))).	1806	1825	0.846154	-18.8	1	1.34102e-06	0.426	0.938111	0.298197	-8.59673	16	19	7	3UTR		0	0
hsa-miR-1178-3p	NM_001256794	BMPR1B	(((((.((((((((((((...&))))......)))))))).))))).	2881	2906	0.923077	-18.8	1	0.000365485	0.515	0.320042	0.346159	-5.83853	17	25	8	3UTR		0	0
hsa-miR-1178-3p	NM_001256798	NOL4L	.(.(((((((.(((((((((.&)))))))))...))))))).).	4203	4225	0.846154	-23.2	1	0.000229455	0.338	2.82193	3.07818	-8.17564	17	22	9	3UTR		0	0
hsa-miR-1178-3p	NM_001256798	NOL4L	..((((..(((((((((((..&)))))))))))..)))).	6536	6554	0.923077	-22.9	1	1.63873e-06	0.426	2.1234	1.43641	-8.81432	15	18	11	3UTR		0	0
hsa-miR-1178-3p	NM_001256799	GAPDH	(((((((((...(((((((..&)))))))...)))).))))).	132	153	0.923077	-22.6	1	0.001472	0.324	-0.304713	-0.42563	-11.3517	16	21	7	5UTR		0	0
hsa-miR-1178-3p	NM_001256799	GAPDH	..((((.((((((((((((..&))))))))))..)).)))).	1322	1342	1	-21.4	1	0.000128778	0.471	1.10592	0.933222	-6.50069	16	20	10	3UTR		0	0
hsa-miR-1178-3p	NM_001256799	GAPDH	..(((..((((((((.(((..&)))..))))))))..))).	358	377	0.846154	-17.9	1	0.000444287	0.515	5.68252	4.93434	-8.6347	14	19	8	CDS		0	0
hsa-miR-1178-3p	NM_001256809	GRM4	.((((((..((((((((((..&)))))))))))))))).	5935	5952	0.923077	-22.3	1	7.11255e-08	0.441	2.96869	3.82544	-7.16335	16	17	16	3UTR		0	0
hsa-miR-1178-3p	NM_001256811	GRM4	.((((((..((((((((((..&)))))))))))))))).	6361	6378	0.923077	-22.3	1	7.11255e-08	0.441	2.09393	4.0989	-7.16335	16	17	16	3UTR		0	0
hsa-miR-1178-3p	NM_001256812	GRM4	.((((((..((((((((((..&)))))))))))))))).	5636	5653	0.923077	-22.3	1	7.11255e-08	0.441	2.7567	4.30155	-7.16335	16	17	16	3UTR		0	0
hsa-miR-1178-3p	NM_001256812	GRM4	.(((((.(((((((((((...&)))))).....)))))))))).	4036	4058	1	-20.6	1	0.000387308	0.368	0.541273	0.57103	-5.33701	16	22	10	3UTR		0	0
hsa-miR-1178-3p	NM_001256813	GRM4	.((((((..((((((((((..&)))))))))))))))).	5845	5862	0.846154	-22.3	1	7.11255e-08	0.441	5.51712	4.65117	-7.16335	16	17	16	3UTR		0	0
hsa-miR-1178-3p	NM_001256813	GRM4	.(((((.(((((((((((...&)))))).....)))))))))).	4245	4267	0.923077	-20.6	1	0.000387308	0.368	2.67209	3.34986	-5.33701	16	22	10	3UTR		0	0
hsa-miR-1178-3p	NM_001256820	RIT1	((.(((.((.(((((((((((&.))))))))))).)).))).)).	3146	3177	0.923077	-22.7	1	0.0383852	0.574	-0.64477	1.52541	-8.28131	18	23	11	3UTR		0	0
hsa-miR-1178-3p	NM_001256821	RIT1	((.(((.((.(((((((((((&.))))))))))).)).))).)).	3229	3260	0.923077	-22.7	1	0.0383852	0.574	1.40387	0.28118	-8.28131	18	23	11	3UTR		0	0
hsa-miR-1178-3p	NM_001256828	SMG6	..((((.((((((((((((((&))))))).........................))))))))))).	1931	1975	0.846154	-19.6	1	3.59205e-05	0.456	3.39903	4.34428	-6.50069	18	44	11	3UTR		0	0
hsa-miR-1178-3p	NM_001256829	TMEM265	((((((((((.((((((((..&))).)))))))))).........))))).	79	108	0.923077	-18.3	1	0.00639498	0.426	1.71972	1.37653	-6.76235	18	29	10	CDS		0	0
hsa-miR-1178-3p	NM_001256830	ASIC1	((((((.(((.(((((((((.&))))))))).)))..)))))).	1720	1742	0.923077	-24.7	1	0.0432709	0.368	1.85294	2.11562	-8.30604	18	22	9	3UTR		0	0
hsa-miR-1178-3p	NM_001256830	ASIC1	...((((((((((((((((((&)))))))..................))))))))))).	3100	3137	0.846154	-23.6	1	0.00239341	0.397	0.302792	0.372727	-6.51454	18	37	11	3UTR		0	0
hsa-miR-1178-3p	NM_001256830	ASIC1	((.(((((.((((((((((..&))))))))))....))))).)).	2121	2144	0.923077	-21.3	1	0.000223328	0.412	2.34129	1.06285	-6.5515	17	23	10	3UTR		0	0
hsa-miR-1178-3p	NM_001256830	ASIC1	..(((((.((((((((((((.&))))))))))))...))).)).	1303	1325	0.884615	-21.5	1	0.000430194	0.574	6.27012	5.32224	-7.27064	17	22	12	CDS		0	0
hsa-miR-1178-3p	NM_001256834	AURKB	.(((((((((((.(((((...&.)).))).))))))))).)).	164	191	0.884615	-18.4	1	0.0156082	0.456	2.5499	2.21511	-5.08246	16	21	9	CDS		0	0
hsa-miR-1178-3p	NM_001256834	AURKB	....(((((.((((((((...&))))))))))))).	574	588	1	-18.3	1	0.0229674	0.544	5.80084	4.16382	-10.7891	13	14	13	CDS		0	0
hsa-miR-1178-3p	NM_001256835	QTRT2	((((.(((((..(((((((((&)))))))))))))))))).	3640	3659	1	-19.2	1	0.000542352	0.632	0.918156	0.697787	-14.2282	18	19	18	3UTR		0	0
hsa-miR-1178-3p	NM_001256836	QTRT2	((((.(((((..(((((((((&)))))))))))))))))).	3286	3305	1	-19.2	1	0.000542352	0.632	0.918156	0.697787	-14.2282	18	19	18	3UTR		0	0
hsa-miR-1178-3p	NM_001256837	QTRT2	((((.(((((..(((((((((&)))))))))))))))))).	3384	3403	1	-19.2	1	0.000542352	0.632	0.918156	0.697787	-14.2282	18	19	18	3UTR		0	0
hsa-miR-1178-3p	NM_001256838	ZNF382	..(((((((((.(((((((..&)).)))))..))))))))).	4050	4070	0.923077	-23.6	1	1.48489e-06	0.338	0.315367	-0.0827739	-8.3038	16	20	9	3UTR		0	0
hsa-miR-1178-3p	NM_001256841	CD300A	..((.((((((((((((((((&)))))))))))..)).))))).	56	78	0.846154	-20.6	1	6.88997e-05	0.368	-0.579757	-0.295898	-9.07604	18	22	11	5UTR		0	0
hsa-miR-1178-3p	NM_001256847	ABR	..(((.(((((((((((((..&))))))))).))))..))).	1945	1965	0.846154	-20.3	1	0.000249184	0.368	0.342479	0.254454	-6.85796	16	20	9	3UTR		0	0
hsa-miR-1178-3p	NM_001256849	POLD1	..((((.(.((((.(((((((&))))))))))).))))).	1100	1118	0.846154	-20.7	1	9.5243e-09	0.25	5.26723	3.03953	-8.41392	16	18	11	CDS		0	0
hsa-miR-1178-3p	NM_001256849	POLD1	..((((.((.(((((((....&))))))).)))))).	230	245	0.846154	-19.5	1	0.000634159	0.353	2.7718	1.48279	-7.74319	13	15	7	CDS		0	0
hsa-miR-1178-3p	NM_001256850	TTN	...((((((.(((((((((..&))))))))).)))))).	30411	30428	0.923077	-25.2	1	0.0832753	0.515	4.16421	4.48539	-7.75705	15	17	9	CDS		0	0
hsa-miR-1178-3p	NM_001256850	TTN	..((.(((((.((((((((..&))))))))))))))).	11280	11296	0.923077	-23.2	1	0.000533831	0.574	5.19639	4.71623	-11.9008	15	16	15	CDS		0	0
hsa-miR-1178-3p	NM_001256850	TTN	..(((((((((((((((((((&))))...))))))))..))))))).	77950	77975	1	-23.4	1	0.00247753	0.485	4.05112	2.66921	-4.957	19	25	8	CDS		0	0
hsa-miR-1178-3p	NM_001256850	TTN	((((...(((((((((((...&)))))))))))..)))).	16977	16995	1	-22.9	1	0.000494195	0.603	3.2519	4.46042	-11.5013	15	18	11	CDS		0	0
hsa-miR-1178-3p	NM_001256852	USP17L10	(((((...(((((((((((..&))))))))))).....))))).	1547	1569	1	-21.7	1	0.120581	0.476	0.188484	-0.0786081	-9.69585	16	22	11	CDS		0	0
hsa-miR-1178-3p	NM_001256852	USP17L10	...(((((((((((((((...&.))))).)).)))))))).	1131	1150	1	-21.3	1	0.00506874	0.515	0.301122	0.363903	-6.51454	15	19	8	CDS		0	0
hsa-miR-1178-3p	NM_001256852	USP17L10	...(((.(((.((((((((..&)))))))).)))))).	1526	1542	0.923077	-20.6	1	0.00054123	0.456	0.0573167	-0.0654784	-10.883	14	16	8	CDS		0	0
hsa-miR-1178-3p	NM_001256853	USP17L12	(((((...(((((((((((..&))))))))))).....))))).	1547	1569	1	-21.7	1	0.210651	0.46	0.0791238	-0.0919824	-9.69585	16	22	11	CDS		0	0
hsa-miR-1178-3p	NM_001256853	USP17L12	...(((((((((((((((...&.))))).)).)))))))).	1131	1150	0.923077	-21.3	1	0.142399	0.529	-0.432129	0.317567	-6.51454	15	19	8	CDS		0	0
hsa-miR-1178-3p	NM_001256854	USP17L11	(((((...(((((((((((..&))))))))))).....))))).	1547	1569	0.923077	-21.7	1	0.210651	0.46	0.0471997	-0.20107	-9.69585	16	22	11	CDS		0	0
hsa-miR-1178-3p	NM_001256854	USP17L11	...(((((((((((((((...&.))))).)).)))))))).	1131	1150	0.923077	-21.3	1	0.130301	0.515	0.0946349	0.243761	-6.51454	15	19	8	CDS		0	0
hsa-miR-1178-3p	NM_001256854	USP17L11	...(((.(((.((((((((..&)))))))).)))))).	1526	1542	0.846154	-19.7	1	0.000183747	0.426	-0.352232	-0.200406	-10.883	14	16	8	CDS		0	0
hsa-miR-1178-3p	NM_001256855	USP17L13	(((((...(((((((((((..&))))))))))).....))))).	1547	1569	0.923077	-21.7	1	0.210651	0.46	0.276689	-0.0919652	-9.69585	16	22	11	CDS		0	0
hsa-miR-1178-3p	NM_001256855	USP17L13	...(((((((((((((((...&.))))).)).)))))))).	1131	1150	0.923077	-21.3	1	0.130301	0.515	0.00255875	0.494671	-6.51454	15	19	8	CDS		0	0
hsa-miR-1178-3p	NM_001256856	BTRC	((.((((((.(((((.(((..&))).))))).)))))).)).	4982	5002	0.923077	-19	1	0.0404887	0.559	0.541986	0.214867	-6.97067	16	20	6	3UTR		0	0
hsa-miR-1178-3p	NM_001256857	USP17L17	(((((...(((((((((((..&))))))))))).....))))).	1547	1569	0.923077	-21.7	1	0.210651	0.46	-0.0187672	-0.229289	-9.69585	16	22	11	CDS		0	0
hsa-miR-1178-3p	NM_001256857	USP17L17	...(((((((((((((((...&.))))).)).)))))))).	1131	1150	0.923077	-21.3	1	0.130301	0.515	-0.34125	0.197943	-6.51454	15	19	8	CDS		0	0
hsa-miR-1178-3p	NM_001256857	USP17L17	...(((.(((.((((((((..&)))))))).)))))).	1526	1542	0.846154	-19.7	1	0.000183748	0.426	-0.345394	-0.177197	-10.883	14	16	8	CDS		0	0
hsa-miR-1178-3p	NM_001256858	RNF34	(((((.(((.(((((((((..&)))))))))))).))))).	13	32	1	-20.5	1	0.00114823	0.41	0.600888	1.34054	-7.08104	17	19	12	5UTR		0	0
hsa-miR-1178-3p	NM_001256859	USP17L18	(((((...(((((((((((..&))))))))))).....))))).	1547	1569	1	-21.7	1	0.210651	0.46	0.16289	-0.116016	-9.69585	16	22	11	CDS		0	0
hsa-miR-1178-3p	NM_001256859	USP17L18	...(((((((((((((((...&.))))).)).)))))))).	1131	1150	0.923077	-21.3	1	0.129203	0.515	0.326428	1.07931	-6.51454	15	19	8	CDS		0	0
hsa-miR-1178-3p	NM_001256860	USP17L19	(((((...(((((((((((..&))))))))))).....))))).	1547	1569	0.923077	-21.7	1	0.210651	0.46	0.0202685	-0.2112	-9.69585	16	22	11	CDS		0	0
hsa-miR-1178-3p	NM_001256860	USP17L19	...(((((((((((((((...&.))))).)).)))))))).	1131	1150	0.923077	-21.3	1	0.142399	0.529	0.0836501	0.21707	-6.51454	15	19	8	CDS		0	0
hsa-miR-1178-3p	NM_001256860	USP17L19	...(((.(((.((((((((..&)))))))).)))))).	1526	1542	0.846154	-19.7	1	0.000183747	0.426	-0.368728	-0.229344	-10.883	14	16	8	CDS		0	0
hsa-miR-1178-3p	NM_001256861	USP17L20	(((((...(((((((((((..&))))))))))).....))))).	1547	1569	1	-21.7	1	0.210651	0.46	0.16289	-0.116016	-9.69585	16	22	11	CDS		0	0
hsa-miR-1178-3p	NM_001256861	USP17L20	...(((((((((((((((...&.))))).)).)))))))).	1131	1150	0.923077	-21.3	1	0.142399	0.529	0.326428	1.07931	-6.51454	15	19	8	CDS		0	0
hsa-miR-1178-3p	NM_001256862	USP17L21	(((((...(((((((((((..&))))))))))).....))))).	1547	1569	1	-21.7	1	0.210651	0.46	0.0791238	-0.0919824	-9.69585	16	22	11	CDS		0	0
hsa-miR-1178-3p	NM_001256862	USP17L21	...(((((((((((((((...&.))))).)).)))))))).	1131	1150	0.923077	-21.3	1	0.142399	0.529	-0.432129	0.317567	-6.51454	15	19	8	CDS		0	0
hsa-miR-1178-3p	NM_001256863	USP17L22	(((((...(((((((((((..&))))))))))).....))))).	1547	1569	0.923077	-21.7	1	0.210651	0.46	0.0471997	-0.20107	-9.69585	16	22	11	CDS		0	0
hsa-miR-1178-3p	NM_001256863	USP17L22	...(((((((((((((((...&.))))).)).)))))))).	1131	1150	0.923077	-21.3	1	0.142399	0.529	0.0946349	0.243761	-6.51454	15	19	8	CDS		0	0
hsa-miR-1178-3p	NM_001256863	USP17L22	...(((.(((.((((((((..&)))))))).)))))).	1526	1542	0.846154	-19.7	1	0.000183747	0.426	-0.352232	-0.200406	-10.883	14	16	8	CDS		0	0
hsa-miR-1178-3p	NM_001256864	DNAJC6	...((((((((((((((((((&)))))))..))))))...))))).	2652	2676	0.846154	-19.9	1	0.0264665	0.485	2.7401	4.19636	-6.51454	18	24	7	CDS		0	0
hsa-miR-1178-3p	NM_001256865	DNAJC6	...((((((((((((((((((&)))))))..))))))...))))).	2553	2577	0.846154	-19.9	1	0.0264665	0.485	3.90781	3.12481	-6.51454	18	24	7	CDS		0	0
hsa-miR-1178-3p	NM_001256865	DNAJC6	(((((((((.((((((.((((&)))).))...)))).))))))))).	1616	1641	0.846154	-19.4	1	0.000209679	0.529	3.00195	3.16421	-5.18008	19	25	9	CDS		0	0
hsa-miR-1178-3p	NM_001256867	USP17L30	(((((...(((((((((((..&))))))))))).....))))).	1547	1569	1	-21.7	1	0.210651	0.46	0.148832	-0.115835	-9.69585	16	22	11	CDS		0	0
hsa-miR-1178-3p	NM_001256867	USP17L30	...(((((((((((((((...&.))))).)).)))))))).	1131	1150	0.923077	-21.3	1	0.130715	0.515	-0.0198907	0.437781	-6.51454	15	19	8	CDS		0	0
hsa-miR-1178-3p	NM_001256869	USP17L7	...(((((((((((((((...&.))))).)).)))))))).	1190	1240	1	-21.3	1	0.00074077	0.515	-0.218923	0.40078	-6.51454	15	19	8	CDS		0	0
hsa-miR-1178-3p	NM_001256870	POLD4	(((((((..((((((((....&))))))))))))))).	959	975	0.923077	-20.3	1	0.00119731	0.382	-0.125977	-0.169347	-7.3076	15	16	15	3UTR		0	0
hsa-miR-1178-3p	NM_001256871	USP17L3	..((((.(((.((((((((..&)))))))).)))..)))).	1526	1545	1	-23.2	1	0.000599744	0.426	0.160221	-0.0202899	-9.32546	15	19	8	CDS		0	0
hsa-miR-1178-3p	NM_001256871	USP17L3	(((((...(((((((((((..&))))))))))).....))))).	1547	1569	0.923077	-21.7	1	0.201954	0.46	-0.479968	-0.0888942	-9.69585	16	22	11	CDS		0	0
hsa-miR-1178-3p	NM_001256871	USP17L3	...(((((((((((((((...&.))))).)).)))))))).	1131	1150	1	-21.3	1	0.000765929	0.515	0.104959	0.204314	-6.51454	15	19	8	CDS		0	0
hsa-miR-1178-3p	NM_001256872	USP17L8	(((((...(((((((((((..&))))))))))).....))))).	1547	1569	1	-21.7	1	0.181914	0.508	0.131452	-0.080707	-9.69585	16	22	11	CDS		0	0
hsa-miR-1178-3p	NM_001256872	USP17L8	...(((((((((((((((...&.))))).)).)))))))).	1131	1150	1	-21.3	1	0.00710064	0.515	0.385179	0.667514	-6.51454	15	19	8	CDS		0	0
hsa-miR-1178-3p	NM_001256872	USP17L8	...(((.(((.((((((((..&)))))))).)))))).	1526	1542	0.846154	-20.6	1	0.000492545	0.471	0.429377	-0.103764	-10.883	14	16	8	CDS		0	0
hsa-miR-1178-3p	NM_001256873	USP17L1	..((((.(((.((((((((..&)))))))).)))..)))).	1526	1545	1	-23.2	1	0.000599744	0.426	0	0	-9.32546	15	19	8	CDS		0	0
hsa-miR-1178-3p	NM_001256873	USP17L1	(((((...(((((((((((..&))))))))))).....))))).	1547	1569	1	-21.7	1	0.201954	0.46	0	0	-9.69585	16	22	11	CDS		0	0
hsa-miR-1178-3p	NM_001256873	USP17L1	...(((((((((((((((...&.))))).)).)))))))).	1131	1150	1	-21.3	1	0.000784311	0.515	0	0	-6.51454	15	19	8	CDS		0	0
hsa-miR-1178-3p	NM_001256874	USP17L4	(((((...(((((((((((..&))))))))))).....))))).	1547	1569	1	-21.7	1	0.181914	0.508	0.131452	-0.080707	-9.69585	16	22	11	CDS		0	0
hsa-miR-1178-3p	NM_001256874	USP17L4	...(((((((((((((((...&.))))).)).)))))))).	1131	1150	1	-21.3	1	0.00710064	0.515	0.385179	0.667514	-6.51454	15	19	8	CDS		0	0
hsa-miR-1178-3p	NM_001256874	USP17L4	...(((.(((.((((((((..&)))))))).)))))).	1526	1542	0.846154	-20.6	1	0.000492545	0.471	0.429377	-0.103764	-10.883	14	16	8	CDS		0	0
hsa-miR-1178-3p	NM_001256876	KANK1	.(((((.(((((.((((((..&)))))).)))))..))))).	3778	3798	0.923077	-20.2	1	0.00709918	0.515	0.420364	1.66527	-6.62614	16	20	6	CDS		0	0
hsa-miR-1178-3p	NM_001256876	KANK1	..((((.((((((.(((((..&))))))))))).)))).	1824	1841	0.923077	-18.4	1	0.030762	0.368	0.505051	2.50853	-7.35753	15	17	11	CDS		0	0
hsa-miR-1178-3p	NM_001256877	KANK1	((((.(.((((((((((....&))))))))))).)))).	1588	1605	0.923077	-20.8	1	2.75296e-06	0.441	1.37516	3.9857	-9.6003	15	17	11	CDS		0	0
hsa-miR-1178-3p	NM_001256877	KANK1	.(((((.(((((.((((((..&)))))).)))))..))))).	3888	3908	0.846154	-20.2	1	0.00709918	0.515	4.69706	4.28608	-6.62614	16	20	6	CDS		0	0
hsa-miR-1178-3p	NM_001256879	POLD2	((((((.((((((((((((((&)))))))).)))))))))))).	588	610	0.923077	-25.2	1	2.06892e-07	0.426	5.52543	4.65757	-5.48126	20	22	12	5UTR		0	0
hsa-miR-1178-3p	NM_001256879	POLD2	.((((((((((((..((((..&)))))))))))).)))).	1376	1394	0.846154	-21.7	1	0.000511355	0.294	4.3381	3.24127	-5.38561	16	18	12	CDS		0	0
hsa-miR-1178-3p	NM_001256887	CALHM4	..((((.((.((((((((...&)))))))).)))))).	3243	3259	1	-20.3	1	0.000675831	0.574	-1.01045	0.361663	-7.74319	14	16	8	3UTR		0	0
hsa-miR-1178-3p	NM_001256888	CALHM4	..((((.((.((((((((...&)))))))).)))))).	3149	3165	1	-20.3	1	0.000675831	0.574	-1.01045	0.361663	-7.74319	14	16	8	3UTR		0	0
hsa-miR-1178-3p	NM_001256889	CALHM4	..((((.((.((((((((...&)))))))).)))))).	3027	3043	1	-20.3	1	0.000675831	0.574	-1.01045	0.361663	-7.74319	14	16	8	3UTR		0	0
hsa-miR-1178-3p	NM_001256894	USP17L15	(((((...(((((((((((..&))))))))))).....))))).	1547	1569	0.923077	-21.7	1	0.0813853	0.456	0.135033	-0.376386	-9.69585	16	22	11	CDS		0	0
hsa-miR-1178-3p	NM_001256894	USP17L15	...(((((((((((((((...&.))))).)).)))))))).	1131	1150	0.923077	-21.3	1	0.130301	0.515	-0.22425	0.221455	-6.51454	15	19	8	CDS		0	0
hsa-miR-1178-3p	NM_001256894	USP17L15	...(((.(((.((((((((..&)))))))).)))))).	1526	1542	0.846154	-19.7	1	0.003216	0.426	-0.248715	-0.305649	-10.883	14	16	8	CDS		0	0
hsa-miR-1178-3p	NM_001256909	CYBRD1	((((((.((((((...(((..&.)))....)))))).)))))).	579	603	0.871795	-20.2	1	0.00762497	0.485	-0.007039	1.63056	-7.3066	15	22	6	CDS		0	0
hsa-miR-1178-3p	NM_001256909	CYBRD1	(((((((((((((((((....&)))............))))))))))..)))).	352	384	0.846154	-17.9	1	0.000879178	0.618	3.10169	2.88441	-3.93757	17	32	10	CDS		0	0
hsa-miR-1178-3p	NM_001256910	DDX21	...(((((((.(((((((...&))))))))))).))).	2197	2213	0.923077	-19.9	1	6.09332e-05	0.397	5.27697	4.03413	-9.33931	14	16	11	CDS		0	0
hsa-miR-1178-3p	NM_001256910	DDX21	...(((((((.(((((((...&))))))))))).))).	2257	2273	1	-19.9	1	0.00808299	0.426	4.24456	3.0461	-9.33931	14	16	11	CDS		0	0
hsa-miR-1178-3p	NM_001256910	DDX21	..(((..(((((((((((...&)))))))))).)..))).	2167	2185	0.923077	-19.2	1	0.00962381	0.397	3.25217	3.90897	-8.40165	14	18	10	CDS		0	0
hsa-miR-1178-3p	NM_001256915	IDNK	..((((....((((((((...&))))))))...)))).	7	23	0.846154	-18.6	1	0.000354637	0.269	0	0	-11.1132	12	16	8	5UTR		0	0
hsa-miR-1178-3p	NM_001256916	MS4A2	..(((((((((.(((((((..&.)).)))))..))))))))).	1855	1881	0.923077	-23.9	1	7.13941e-05	0.382	-0.260333	-0.298245	-8.3038	16	21	9	3UTR		0	0
hsa-miR-1178-3p	NM_001256916	MS4A2	(((((((((...((((((...&))))))....))))))))).	1687	1707	0.846154	-22.8	1	1.91239e-05	0.426	-0.0403333	-0.31675	-11.3517	15	20	9	3UTR		0	0
hsa-miR-1178-3p	NM_001256916	MS4A2	((.((....((((((((((((&))))))))))))....)).)).	577	599	0.846154	-20.9	1	0.137627	0.544	0.592966	1.37269	-12.3098	16	22	12	CDS		0	0
hsa-miR-1178-3p	NM_001256917	C16orf95	..((((.(((((.((((((..&.)))))).))))))))).	62	89	0.923077	-21.3	1	3.36132e-05	0.309	-0.143239	0.170966	-7.78982	15	18	9	5UTR		0	0
hsa-miR-1178-3p	NM_001256932	LOC730183	(((((((((((((........&))))))))))))).	167	181	0.846154	-16.5	1	1.54609e-05	0.368	-0.332553	-0.0523953	-5.76291	13	14	13	CDS		0	0
hsa-miR-1178-3p	NM_001256944	CLCN4	(((((((((((((((((((..&.)))..))))))))..)))))))).	2098	2158	0.807692	-22.6	1	0.000261967	0.456	4.9571	4.75405	-3.93757	19	25	8	CDS		0	0
hsa-miR-1178-3p	NM_001256944	CLCN4	...(((((((((((.(((...&))).))))))))))).	1581	1597	0.923077	-19.8	1	0.000200782	0.368	6.73039	5.45465	-7.24999	14	16	11	CDS		0	0
hsa-miR-1178-3p	NM_001256945	FAAP20	.((.(((((.(((((((((..&))))))))).))))).)).	968	987	0.923077	-21.5	1	0.000176568	0.338	0.118448	1.32324	-8.06785	16	19	9	3UTR		0	0
hsa-miR-1178-3p	NM_001256946	FAAP20	((((((.((((((((((((((&))))))))....)))))))))))).	113	138	0.923077	-23.9	1	2.35317e-05	0.294	-0.774536	-0.417972	-5.48126	20	25	12	CDS		0	0
hsa-miR-1178-3p	NM_001256959	CLCN6	(((.((((((.((.(((((((&)))))))))...))))))))).	3033	3055	0.923077	-20.1	1	0.0112684	0.529	0.287394	0.291451	-10.6512	18	22	9	3UTR		0	0
hsa-miR-1178-3p	NM_001256964	CCDC51	.(((((...(((((((((.((&)))))))))))....))))).	326	347	0.923077	-21.2	1	6.59008e-05	0.338	1.99689	1.96721	-8.70704	16	21	11	CDS		0	0
hsa-miR-1178-3p	NM_001256964	CCDC51	((((....((((((((((...&))))))))))..)))).	116	133	0.846154	-19.8	1	0.000510186	0.338	-0.219704	-0.135346	-13.8149	14	17	10	5UTR		0	0
hsa-miR-1178-3p	NM_001256965	CCDC51	..(((((.((((((((((...&)))))))))).)).))).	116	134	1	-21.8	1	0.000892729	0.324	-0.219704	-0.135346	-7.27064	15	18	10	5UTR		0	0
hsa-miR-1178-3p	NM_001256965	CCDC51	.(((((...(((((((((.((&)))))))))))....))))).	205	226	0.923077	-21.2	1	6.59008e-05	0.338	0.133633	1.05461	-8.70704	16	21	11	5UTR		0	0
hsa-miR-1178-3p	NM_001256966	CCDC51	..(((((.((((((((((...&)))))))))).)).))).	116	134	1	-21.8	1	0.000892729	0.324	-0.219704	-0.135346	-7.27064	15	18	10	5UTR		0	0
hsa-miR-1178-3p	NM_001256966	CCDC51	.(((((...(((((((((.((&)))))))))))....))))).	205	226	0.923077	-21.2	1	6.59008e-05	0.338	0.133633	1.05461	-8.70704	16	21	11	5UTR		0	0
hsa-miR-1178-3p	NM_001256968	CCDC51	.(((((...(((((((((.((&)))))))))))....))))).	97	118	0.923077	-21.2	1	6.59008e-05	0.338	0.281331	0.0103632	-8.70704	16	21	11	5UTR		0	0
hsa-miR-1178-3p	NM_001257	CDH13	((((((..(((((((((((..&))).)))))))))))))).	2975	2994	0.923077	-21.3	1	0.000152284	0.456	-0.057157	0.0621014	-7.7949	17	19	14	3UTR		0	1
hsa-miR-1178-3p	NM_001257	CDH13	.(((((((.((((((((((..&))))))))))))...................))))).	4366	4403	1	-20.2	1	0.026268	0.426	-0.103591	-0.262566	-4.84971	17	37	12	3UTR		0	1
hsa-miR-1178-3p	NM_001257069	FBXW7	(((((..(((((((((((((.&))).))))))))))....))))).	436	460	0.923077	-21.8	1	0.00790582	0.5	1.34883	2.38541	-7.38222	18	24	10	CDS		0	0
hsa-miR-1178-3p	NM_001257069	FBXW7	((((....(((((((((((..&)).)))))))))....)))).	470	491	0.846154	-18	1	0.0043887	0.529	2.23646	2.31135	-13.8149	15	21	9	CDS		0	0
hsa-miR-1178-3p	NM_001257096	PAX1	.(((((.((((((((((((((&)))))).)))))))).))))).	2380	2402	1	-23.5	1	0.0024109	0.485	0.0882473	0.00604511	-5.33701	19	22	8	3UTR		0	0
hsa-miR-1178-3p	NM_001257096	PAX1	...((((((.((((((((((.&)))))))))).)).)))).	3887	3906	1	-22.3	1	0.0637445	0.426	-0.102235	-0.293911	-7.75705	16	19	10	3UTR		0	0
hsa-miR-1178-3p	NM_001257097	RHNO1	.(((((.((..((((((((..&))))))))..)).))).)).	1783	1803	0.923077	-18.7	1	0.0728659	0.574	-0.243643	-0.116097	-9.40429	15	20	8	3UTR		0	0
hsa-miR-1178-3p	NM_001257097	RHNO1	(((((((.....(((((((..&))))))).))))))).	942	958	0.846154	-18.1	1	1.52443e-05	0.471	1.3428	2.14767	-14.7217	14	16	7	CDS		0	0
hsa-miR-1178-3p	NM_001257101	PCGF5	..(((((((((.(((((((..&.)).)))))..))))))))).	5112	5159	1	-23.9	1	9.70187e-05	0.426	-0.28282	0.112047	-8.3038	16	21	9	3UTR		0	0
hsa-miR-1178-3p	NM_001257101	PCGF5	((((((((((..(((((((((&)))))))))...)))......................))))))).	6426	6471	1	-19.2	1	0.00141642	0.559	1.01905	1.20492	-10.1092	19	45	9	3UTR		0	0
hsa-miR-1178-3p	NM_001257118	CASP1	(((((((.((((((((((..(&.)..)))))))).))...))))))).	749	785	0.923077	-21.1	1	0.0506143	0.559	3.11683	1.12251	-6.25121	18	26	8	CDS		0	0
hsa-miR-1178-3p	NM_001257119	CASP1	(((((((.((((((((((..(&)..)))))))).))...))))))).	697	722	0.923077	-20.9	1	0.0506143	0.559	-0.300045	-0.00129537	-6.25121	18	25	8	CDS		0	0
hsa-miR-1178-3p	NM_001257134	COX14	..((((.((((((..((((((&))))))..)))))))))).	78	97	0.846154	-24.2	1	3.82692e-10	0.265	-0.379756	-0.261741	-8.09298	16	19	10	5UTR		0	0
hsa-miR-1178-3p	NM_001257135	LIF	((((((.(((((((.(((...&))).))))))))))))).	1279	1297	1	-22.8	1	0.00207382	0.382	0.106561	0.735574	-6.21671	16	18	13	3UTR		0	0
hsa-miR-1178-3p	NM_001257135	LIF	((((((((((((((.......&.)))))))))))))).	1972	2008	1	-22.3	1	6.50997e-09	0.412	0.615426	0.00607362	-4.90607	14	16	14	3UTR		0	0
hsa-miR-1178-3p	NM_001257135	LIF	((.(((.((((((((((((((&))))))..............................))))))))..))).)).	2355	2408	0.923077	-20.6	1	0.0291457	0.368	0.10496	-0.0965862	-7.0388	19	53	8	3UTR		0	0
hsa-miR-1178-3p	NM_001257137	ITCH	((((((((......(((((((&))))))).)))))))).	3332	3349	0.923077	-19.8	1	2.4566e-06	0.529	0.574542	1.30664	-14.554	15	17	8	3UTR		0	0
hsa-miR-1178-3p	NM_001257137	ITCH	.(((.(((.((((((((((..&)).)))))))).)))))).	4006	4025	0.923077	-18.5	1	0.000236538	0.603	0.240018	0.401917	-8.96875	16	19	8	3UTR		0	0
hsa-miR-1178-3p	NM_001257138	ITCH	((((((((......(((((((&))))))).)))))))).	3067	3084	0.923077	-19.8	1	2.4566e-06	0.529	0.574542	1.30664	-14.554	15	17	8	3UTR		0	0
hsa-miR-1178-3p	NM_001257138	ITCH	.(((.(((.((((((((((..&)).)))))))).)))))).	3741	3760	0.923077	-18.5	1	0.000236538	0.603	0.240018	0.401917	-8.96875	16	19	8	3UTR		0	0
hsa-miR-1178-3p	NM_001257139	CLCNKA	..((((((.(((((.((((..&)))).))))).)))))).	1887	1905	0.846154	-23.3	1	7.63638e-06	0.397	2.43484	1.47541	-6.74884	15	18	6	CDS		0	0
hsa-miR-1178-3p	NM_001257144	DDX11	(((((...(((((((((((((&)))))))))))))...))))).	1476	1498	1	-25.1	1	0.0320781	0.544	3.47668	3.07322	-9.69585	18	22	13	CDS		0	0
hsa-miR-1178-3p	NM_001257144	DDX11	..(((..((.(((((((((((&))))))))))).))..))).	688	708	0.923077	-21.3	1	0.00167664	0.382	3.60829	2.05533	-9.64415	16	20	11	CDS		0	0
hsa-miR-1178-3p	NM_001257145	DDX11	(((((...(((((((((((((&)))))))))))))...))))).	1403	1425	1	-25.1	1	0.0320781	0.544	3.47668	3.07322	-9.69585	18	22	13	CDS		0	0
hsa-miR-1178-3p	NM_001257145	DDX11	..(((..((.(((((((((((&))))))))))).))..))).	615	635	0.923077	-21.3	1	0.00167664	0.382	3.60829	2.05533	-9.64415	16	20	11	CDS		0	0
hsa-miR-1178-3p	NM_001257158	CEP41	((((((.((.((((((((...&)))))))).)).)))))).	3777	3796	0.846154	-24.3	1	0.628554	0.515	0.523988	0.959774	-6.72377	16	19	8	3UTR		0	1
hsa-miR-1178-3p	NM_001257158	CEP41	...(((.((((.(((((((((&)))))))))..))))))).	3377	3396	0.846154	-19.3	1	1.86733e-05	0.515	1.84689	1.54668	-11.405	16	19	9	3UTR		0	1
hsa-miR-1178-3p	NM_001257159	CEP41	((((((.((.((((((((...&)))))))).)).)))))).	3729	3748	0.846154	-24.3	1	0.628554	0.515	0.452024	0.857424	-6.72377	16	19	8	3UTR		0	1
hsa-miR-1178-3p	NM_001257168	ELK1	.(((((.((((((((((((..&))))))))))))))).)).	1786	1805	1	-21.5	1	5.55906e-05	0.485	0	0	-5.33701	17	19	15	3UTR		0	0
hsa-miR-1178-3p	NM_001257172	DDX19B	((((((((((.((((((((..&.)))...))))).)))))))))).	587	628	0.884615	-25.1	1	0.0178284	0.5	4.42903	4.65823	-6.76235	18	24	10	CDS		0	0
hsa-miR-1178-3p	NM_001257173	DDX19B	((((((((((.((((((((..&.)))...))))).)))))))))).	780	821	0.884615	-25.1	1	0.0178284	0.5	4.42903	4.65823	-6.76235	18	24	10	CDS		0	0
hsa-miR-1178-3p	NM_001257174	DDX19B	((((((((((.((((((((..&.)))...))))).)))))))))).	678	719	0.884615	-25.1	1	0.0178284	0.5	4.42903	4.65823	-6.76235	18	24	10	CDS		0	0
hsa-miR-1178-3p	NM_001257180	SLC20A2	....(((((.(((((((((((&))))))))))).))))).	2114	2132	0.846154	-25.7	1	1.28359e-05	0.412	5.02223	2.82178	-10.7891	16	18	11	CDS		0	0
hsa-miR-1178-3p	NM_001257181	SLC20A2	....(((((.(((((((((((&))))))))))).))))).	1974	1992	0.846154	-25.7	1	1.28359e-05	0.412	3.67038	4.45574	-10.7891	16	18	11	CDS		0	0
hsa-miR-1178-3p	NM_001257189	DDX56	..((((.((((((((((((..&)).))).))))))))))).	1105	1124	0.807692	-19.6	1	0.000275468	0.426	4.25366	3.15055	-6.50069	16	19	11	CDS		0	0
hsa-miR-1178-3p	NM_001257190	POM121	.((((((((((((((((((((&))))))..)))))))).............)))))).	5070	5106	1	-23.5	1	7.99645e-05	0.382	0.471294	1.90125	-3.79332	20	36	8	3UTR		0	0
hsa-miR-1178-3p	NM_001257190	POM121	(((((((((...((((((...&))))))....))))))))).	6667	6687	0.923077	-22.8	1	3.18787e-05	0.441	-0.433028	-0.00846246	-11.3517	15	20	9	3UTR		0	0
hsa-miR-1178-3p	NM_001257191	DDX6	..(((((((.(((..((((..&))))..))).))))))).	4967	4985	0.807692	-23.5	1	0.000831485	0.544	6.27576	6.14642	-7.7918	14	18	7	3UTR		0	0
hsa-miR-1178-3p	NM_001257191	DDX6	((((((((((((((((((...&)))))))))...)))))..)))).	927	951	0.846154	-21.5	1	3.01344e-05	0.485	2.84313	1.42202	-3.93757	18	24	9	CDS		0	0
hsa-miR-1178-3p	NM_001257191	DDX6	..((((.((.((((((((...&)))))))).)))))).	5996	6012	0.923077	-20.3	1	1.58649e-05	0.5	3.208	3.27092	-7.74319	14	16	8	3UTR		0	0
hsa-miR-1178-3p	NM_001257194	KLHL3	...(((((((.((((((....&)))))).))))))).	1587	1602	0.923077	-19	1	0.000363718	0.485	2.58045	2.74902	-9.33931	13	15	7	CDS		0	0
hsa-miR-1178-3p	NM_001257195	KLHL3	...(((((((.((((((....&)))))).))))))).	1172	1187	0.923077	-19	1	0.000363718	0.485	0.0120299	-0.065361	-9.33931	13	15	7	CDS		0	0
hsa-miR-1178-3p	NM_001257199	GPD1	(((((((((...((((((((.&.))))))))))))))))).	2100	2144	1	-25.2	1	0.00356683	0.471	0.352399	0.0138392	-11.3517	17	19	17	3UTR		0	0
hsa-miR-1178-3p	NM_001257199	GPD1	..((((((((.((((((((((&))))))))))...))).))))).	1937	1960	0.846154	-23.6	1	1.27931e-06	0.397	0.48717	0.229355	-7.78178	18	23	10	3UTR		0	0
hsa-miR-1178-3p	NM_001257205	FGF1	((((((.(((((((((((...&.))))...))))))))))))).	594	645	1	-23.3	1	0.0150188	0.382	0.485503	0.105641	-5.48126	17	22	13	CDS		0	0
hsa-miR-1178-3p	NM_001257207	FGF1	((((((.(((((((((((...&.))))...))))))))))))).	337	388	1	-23.3	1	0.0150188	0.382	0.0345148	0.0547461	-5.48126	17	22	13	CDS		0	0
hsa-miR-1178-3p	NM_001257208	FGF1	((((((.(((((((((((...&.))))...))))))))))))).	312	363	1	-23.3	1	0.0150188	0.382	0.249471	0.192677	-5.48126	17	22	13	CDS		0	0
hsa-miR-1178-3p	NM_001257209	FGF1	((((((.(((((((((((...&.))))...))))))))))))).	350	401	0.923077	-23.3	1	0.0150188	0.382	0.0724493	-0.110476	-5.48126	17	22	13	CDS		0	0
hsa-miR-1178-3p	NM_001257209	FGF1	...(((((..(((.(((((((&)))))))..))).))))).	1482	1501	0.846154	-17.9	1	0.0021262	0.485	0.356832	0.465048	-9.67028	15	19	7	3UTR		0	0
hsa-miR-1178-3p	NM_001257210	FGF1	((((((.(((((((((((...&.))))...))))))))))))).	272	323	0.846154	-23.3	1	0.0150188	0.382	0.700459	-0.117852	-5.48126	17	22	13	CDS		0	0
hsa-miR-1178-3p	NM_001257239	ALG13	.(((.(((((((((((.((((&.))))..)))))))))))))).	182	231	0.846154	-18.5	1	1.92124e-05	0.529	2.05396	0.830315	-7.91236	18	22	14	5UTR		0	0
hsa-miR-1178-3p	NM_001257268	RD3L	((((((((......(((((..&.))))))))))))).	833	854	0.846154	-18.2	1	0.000403281	0.441	2.26297	2.64307	-14.554	13	15	13	CDS		0	0
hsa-miR-1178-3p	NM_001257273	ZNF451	((((...(((((((((((((.&))))))..)))))))...)))).	4562	4585	0.846154	-21.1	1	0.00434524	0.618	0.273473	0.121327	-11.5013	17	23	7	3UTR		0	0
hsa-miR-1178-3p	NM_001257281	DIS3L2	.(((((....(((((((((..&)))))))))...))))).	274	292	0.923077	-21.2	1	0.148255	0.574	4.35325	2.61315	-9.94954	14	18	9	CDS		0	0
hsa-miR-1178-3p	NM_001257282	DIS3L2	.(((((....(((((((((..&)))))))))...))))).	274	292	0.923077	-21.2	1	0.148255	0.574	2.46932	1.52967	-9.94954	14	18	9	CDS		0	0
hsa-miR-1178-3p	NM_001257291	SLC9A7	((((.(((((((.((((((..&)))))).))))))))))).	7936	7955	0.846154	-23.7	1	8.01798e-05	0.529	4.14945	4.18921	-9.34574	17	19	11	3UTR		0	0
hsa-miR-1178-3p	NM_001257291	SLC9A7	(((((((((((.(((((((..&))))).)).)))))))..)))).	2087	2110	0.820513	-21.7	1	0.00486086	0.426	0.635925	-0.0312319	-7.28438	18	23	7	CDS		0	0
hsa-miR-1178-3p	NM_001257291	SLC9A7	..(((((((((((((((((((&)))))))))...............)))).)))))).	3768	3804	1	-21.1	1	0.000145641	0.544	0.112669	-0.00229665	-4.957	19	36	9	3UTR		0	0
hsa-miR-1178-3p	NM_001257293	HNRNPH1	..((((((((((((((((((.&))))).....................))))))))).)))).	634	675	0.846154	-22.3	1	0.000478454	0.588	2.35085	2.70399	-4.957	18	41	9	CDS		0	0
hsa-miR-1178-3p	NM_001257308	MINAR2	..((((((((((((.((((((&.)))).)).)))....))))))))).	2145	2192	0.923077	-22.6	1	3.80718e-06	0.412	-0.412802	-0.0714256	-5.69245	18	26	9	3UTR		0	0
hsa-miR-1178-3p	NM_001257308	MINAR2	(((((((((...((((((...&))))))....))))))))).	2002	2022	0.846154	-19.4	1	0.00515542	0.426	-0.349389	-0.0647126	-11.3517	15	20	9	3UTR		0	0
hsa-miR-1178-3p	NM_001257319	APBB1	(((((..(((((((((.....&)))))))))..))))).	1804	1821	0.923077	-20.6	1	0.0219631	0.456	1.89911	3.12716	-7.38222	14	17	9	3UTR		0	0
hsa-miR-1178-3p	NM_001257320	APBB1	(((((..(((((((((.....&.)))))))))..))))).	1877	1909	1	-20.8	1	0.0219631	0.456	2.6725	2.36592	-7.38222	14	18	9	3UTR		0	0
hsa-miR-1178-3p	NM_001257320	APBB1	....((((((((((.(((...&))).)))))))))).	921	936	0.846154	-20.1	1	0.000432442	0.368	2.65955	2.95486	-10.282	13	15	10	CDS		0	0
hsa-miR-1178-3p	NM_001257321	APBB1	(((((..(((((((((.....&.)))))))))..))))).	1925	1957	1	-20.8	1	0.0219631	0.456	1.12908	0.762417	-7.38222	14	18	9	3UTR		0	0
hsa-miR-1178-3p	NM_001257323	APBB1	(((((..(((((((((.....&)))))))))..))))).	1798	1815	0.923077	-20.6	1	0.0219631	0.456	1.89911	3.12716	-7.38222	14	17	9	3UTR		0	0
hsa-miR-1178-3p	NM_001257325	APBB1	(((((..(((((((((.....&.)))))))))..))))).	1692	1717	0.923077	-20.8	1	0.0219631	0.456	3.41696	3.53414	-7.38222	14	18	9	3UTR		0	0
hsa-miR-1178-3p	NM_001257325	APBB1	....((((((((((.(((...&))).)))))))))).	729	744	0.923077	-20.1	1	0.000432442	0.368	4.14243	3.93019	-10.282	13	15	10	CDS		0	0
hsa-miR-1178-3p	NM_001257326	APBB1	(((((..(((((((((.....&.)))))))))..))))).	1885	1917	1	-20.8	1	0.0219631	0.456	1.12908	0.762417	-7.38222	14	18	9	3UTR		0	0
hsa-miR-1178-3p	NM_001257326	APBB1	....((((((((((.(((...&))).)))))))))).	929	944	0.923077	-20.1	1	0.000432442	0.368	2.613	2.80793	-10.282	13	15	10	CDS		0	0
hsa-miR-1178-3p	NM_001257328	ARRB2	.(.(((.((.((((((((...&)))))))).)).))).).	1393	1411	0.923077	-19.6	1	0.581455	0.412	0.139787	2.34701	-8.13706	14	18	8	3UTR		0	0
hsa-miR-1178-3p	NM_001257329	ARRB2	.(.(((.((.((((((((...&)))))))).)).))).).	1199	1217	0.923077	-19.6	1	0.581455	0.412	0.139787	2.34701	-8.13706	14	18	8	3UTR		0	0
hsa-miR-1178-3p	NM_001257331	ARRB2	.(.(((.((.((((((((...&)))))))).)).))).).	1321	1339	0.923077	-19.6	1	0.581455	0.412	0.139787	2.34701	-8.13706	14	18	8	3UTR		0	0
hsa-miR-1178-3p	NM_001257357	RAB44	((((((.((((((((((((..&)))))....))))))).)))))).	2478	2502	0.846154	-23.4	1	0.00079348	0.382	-0.0208621	-0.186132	-5.48126	18	24	7	CDS		0	0
hsa-miR-1178-3p	NM_001257357	RAB44	(((((((((..(((.((((..&)))).)))))))))))).	2146	2164	1	-20.7	1	0.000150551	0.426	-0.0304546	-0.157765	-8.7403	16	18	12	CDS		0	0
hsa-miR-1178-3p	NM_001257357	RAB44	..((.((((((.((((((...&)))))).))))))..)).	3018	3036	0.846154	-20.9	1	1.66361e-05	0.426	2.37921	1.99202	-12.4228	14	18	6	CDS		0	0
hsa-miR-1178-3p	NM_001257359	SAMD14	.((((((((((((((((((((&)))))......))))))))).)))))).	3966	3994	0.807692	-24.3	1	0.0005461	0.368	2.94113	3.58622	-3.79332	20	28	9	3UTR		0	0
hsa-miR-1178-3p	NM_001257361	AMPD2	((((.(.((((((((((....&)))))))))).))))).	275	292	0.846154	-20.1	1	3.13092e-05	0.338	3.05702	4.52549	-9.6003	15	17	10	CDS		0	0
hsa-miR-1178-3p	NM_001257362	LOC100288966	((((((.((((((.(((((..&.)))))))))))...)))))).	352	400	0.923077	-23	1	0.00646717	0.353	0	0	-6.3381	17	22	11	CDS		0	0
hsa-miR-1178-3p	NM_001257362	LOC100288966	((((((.((((((.(((((..&)))))))))))...)))))).	157	178	0.846154	-22.2	1	0.0015145	0.353	0	0	-6.3381	17	21	11	CDS		0	0
hsa-miR-1178-3p	NM_001257362	LOC100288966	((((((.((((((.(((((..&)))))))))))...)))))).	268	289	1	-22.2	1	2.64067e-05	0.382	0	0	-6.3381	17	21	11	CDS		0	0
hsa-miR-1178-3p	NM_001257370	EME2	((((((.((((((((((((..&.))))).))))))))))))).	34	72	0.846154	-23.6	1	5.99321e-07	0.25	-0.659889	-0.345492	-5.48126	18	21	13	CDS		0	0
hsa-miR-1178-3p	NM_001257374	LMNA	..(((((((.(((((((((..&))).)))))).))))))).	1723	1742	0.846154	-21.2	1	0.0781088	0.471	-0.132504	1.20732	-6.19951	16	19	7	CDS		0	0
hsa-miR-1178-3p	NM_001257374	LMNA	..((((((.(((((((((...&)))))).))))))))).	391	408	0.923077	-20.7	1	0.000461625	0.382	3.878	3.55927	-6.01339	15	17	9	CDS		0	0
hsa-miR-1178-3p	NM_001257376	SCFD1	..((((.((..((((((((..&.))))))))...)))))).	1012	1036	0.846154	-20.6	1	0.0131667	0.588	5.7502	5.24244	-10.568	14	19	8	CDS		0	0
hsa-miR-1178-3p	NM_001257378	SEC14L3	((((((.(((((((((((((.&.)))))))).))))).)))))).	1234	1269	0.923077	-26.6	1	0.00406053	0.412	4.29491	3.32419	-5.48126	19	23	8	CDS		0	1
hsa-miR-1178-3p	NM_001257378	SEC14L3	.....((((((((((((((..&)))))))))))))).	483	498	1	-23.9	1	0.000109188	0.529	0.316999	0.159364	-13.6656	14	15	14	5UTR		0	1
hsa-miR-1178-3p	NM_001257378	SEC14L3	...((((.(.(((((((((((&))))))))))).).)))).	700	719	1	-23.4	1	0.0832096	0.5	0.418026	0.0156204	-10.0707	16	19	11	CDS		0	1
hsa-miR-1178-3p	NM_001257379	SEC14L3	((((((.(((((((((((((.&.)))))))).))))).)))))).	1064	1099	0.846154	-26.6	1	0.00406053	0.412	2.82085	3.428	-5.48126	19	23	8	CDS		0	1
hsa-miR-1178-3p	NM_001257379	SEC14L3	...((((.(.(((((((((((&))))))))))).).)))).	530	549	1	-23.4	1	0.0832096	0.5	0.295037	0.100175	-10.0707	16	19	11	CDS		0	1
hsa-miR-1178-3p	NM_001257386	ABCG2	((((((((.(((((.((((..&.))))...))))).)))))))).	3185	3224	0.846154	-21.7	1	0.00277499	0.5	5.88035	4.15796	-5.72941	17	23	8	3UTR		0	0
hsa-miR-1178-3p	NM_001257394	UBE2V1	((((((((((((((((.....&)))))))))))....))))).	722	743	1	-20.1	1	0.0883176	0.529	0.520393	1.31216	-3.93757	16	21	11	CDS		0	0
hsa-miR-1178-3p	NM_001257394	UBE2V1	..((((.((((...((((((.&)))))).....)))))))).	195	215	0.923077	-16.9	1	0.00137785	0.618	1.72095	1.40378	-11.9935	14	20	8	5UTR		0	0
hsa-miR-1178-3p	NM_001257396	UBE2V1	((((((((((((((((.....&)))))))))))....))))).	316	337	1	-20.1	1	0.0883176	0.529	1.49834	1.59758	-3.93757	16	21	11	CDS		0	0
hsa-miR-1178-3p	NM_001257398	UBE2V1	..(((((((((((((((((..&))))))))))..................))))).)).	84	121	0.923077	-21.1	1	0.000109477	0.456	2.01932	2.62617	-4.957	17	37	10	5UTR		0	0
hsa-miR-1178-3p	NM_001257398	UBE2V1	((((((((((((((((.....&)))))))))))....))))).	581	602	0.923077	-20.1	1	0.0883176	0.529	0.442315	0.496317	-3.93757	16	21	11	CDS		0	0
hsa-miR-1178-3p	NM_001257401	CD63	((.(((((((((((((.....&))))))))))))).)).	152	169	1	-19.9	1	0.018156	0.397	3.55397	2.67528	-5.49511	15	17	13	5UTR		0	0
hsa-miR-1178-3p	NM_001257401	CD63	........(((((((((((((&))))))))))))).	46	60	0.846154	-20.4	0	9.31497e-09	0.471	1.44167	0.465927	-19.4239	13	14	13	5UTR		0	0
hsa-miR-1178-3p	NM_001257401	CD63	..(((((..((((((.(((((&))))).))))))))))).	174	192	1	-18.7	1	0.00137631	0.441	3.64478	2.60978	-8.56007	16	18	11	5UTR		0	0
hsa-miR-1178-3p	NM_001257406	IL4R	..(((.(((.((((((((((.&)))))))))).)))...))).	1942	1963	0.846154	-21.9	1	0.000372838	0.426	0.260375	-0.14147	-8.10047	16	21	10	CDS		0	0
hsa-miR-1178-3p	NM_001257407	IL4R	..(((.(((.((((((((((.&)))))))))).)))...))).	2186	2207	0.846154	-21.9	1	0.000372838	0.426	0.260375	-0.14147	-8.10047	16	21	10	CDS		0	0
hsa-miR-1178-3p	NM_001257408	IKZF3	..(((((((((.(((((((..&.)).)))))..))))))))).	7152	7178	0.846154	-23.9	1	2.77613e-05	0.426	0.760333	-0.1401	-8.3038	16	21	9	3UTR		0	0
hsa-miR-1178-3p	NM_001257408	IKZF3	..(((((((((.(((((((..&)).)))))..))))))))).	5610	5630	1	-22.9	1	9.89899e-07	0.338	1.07756	0.731624	-8.3038	16	20	9	3UTR		0	0
hsa-miR-1178-3p	NM_001257408	IKZF3	(((((((((.(((((((((((&))))))))).)).)))))............)))).	5154	5189	0.923077	-22.1	1	0.0200985	0.426	-0.121686	-0.0602711	-5.18008	20	35	9	3UTR		0	0
hsa-miR-1178-3p	NM_001257409	IKZF3	..(((((((((.(((((((..&.)).)))))..))))))))).	7035	7061	0.923077	-23.9	1	2.77613e-05	0.426	0.0878889	-0.0806	-8.3038	16	21	9	3UTR		0	0
hsa-miR-1178-3p	NM_001257409	IKZF3	..(((((((((.(((((((..&)).)))))..))))))))).	5493	5513	0.846154	-22.9	1	9.89899e-07	0.338	0.11605	0.700484	-8.3038	16	20	9	3UTR		0	0
hsa-miR-1178-3p	NM_001257409	IKZF3	(((((((((.(((((((((((&))))))))).)).)))))............)))).	5037	5072	0.923077	-22.1	1	0.0200985	0.426	0.0368042	-0.0887996	-5.18008	20	35	9	3UTR		0	0
hsa-miR-1178-3p	NM_001257410	IKZF3	..(((((((((.(((((((..&.)).)))))..))))))))).	6993	7019	1	-23.9	1	2.77613e-05	0.426	-0.509	-0.1724	-8.3038	16	21	9	3UTR		0	0
hsa-miR-1178-3p	NM_001257410	IKZF3	..(((((((((.(((((((..&)).)))))..))))))))).	5451	5471	1	-22.9	1	9.89899e-07	0.338	0.337937	0.424711	-8.3038	16	20	9	3UTR		0	0
hsa-miR-1178-3p	NM_001257410	IKZF3	(((((((((.(((((((((((&))))))))).)).)))))............)))).	4995	5030	0.923077	-22.1	1	0.0200985	0.426	-0.0186677	-0.0911769	-5.18008	20	35	9	3UTR		0	0
hsa-miR-1178-3p	NM_001257411	IKZF3	..(((((((((.(((((((..&.)).)))))..))))))))).	6825	6851	0.923077	-23.9	1	2.77613e-05	0.426	0.148333	0.08515	-8.3038	16	21	9	3UTR		0	0
hsa-miR-1178-3p	NM_001257411	IKZF3	..(((((((((.(((((((..&)).)))))..))))))))).	5283	5303	0.846154	-22.9	1	9.89899e-07	0.338	-0.031875	0.276126	-8.3038	16	20	9	3UTR		0	0
hsa-miR-1178-3p	NM_001257411	IKZF3	(((((((((.(((((((((((&))))))))).)).)))))............)))).	4827	4862	0.923077	-22.1	1	0.0200985	0.426	-0.0582899	0.0740499	-5.18008	20	35	9	3UTR		0	0
hsa-miR-1178-3p	NM_001257412	IKZF3	..(((((((((.(((((((..&.)).)))))..))))))))).	6708	6734	0.923077	-23.9	1	2.77613e-05	0.426	0.140778	0.178545	-8.3038	16	21	9	3UTR		0	0
hsa-miR-1178-3p	NM_001257412	IKZF3	..(((((((((.(((((((..&)).)))))..))))))))).	5166	5186	0.923077	-22.9	1	9.89899e-07	0.338	-0.137535	-0.0269879	-8.3038	16	20	9	3UTR		0	0
hsa-miR-1178-3p	NM_001257412	IKZF3	(((((((((.(((((((((((&))))))))).)).)))))............)))).	4710	4745	0.846154	-22.1	1	0.0200985	0.426	-0.216781	-0.226686	-5.18008	20	35	9	3UTR		0	0
hsa-miR-1178-3p	NM_001257413	IKZF3	..(((((((((.(((((((..&.)).)))))..))))))))).	6591	6617	0.923077	-23.9	1	2.77613e-05	0.426	0.0931993	0.202573	-8.3038	16	21	9	3UTR		0	0
hsa-miR-1178-3p	NM_001257413	IKZF3	..(((((((((.(((((((..&)).)))))..))))))))).	5049	5069	0.923077	-22.9	1	9.89899e-07	0.338	-0.33829	-0.0662146	-8.3038	16	20	9	3UTR		0	0
hsa-miR-1178-3p	NM_001257413	IKZF3	(((((((((.(((((((((((&))))))))).)).)))))............)))).	4593	4628	0.923077	-22.1	1	0.0200985	0.426	0.132259	-0.0345316	-5.18008	20	35	9	3UTR		0	0
hsa-miR-1178-3p	NM_001257414	IKZF3	..(((((((((.(((((((..&.)).)))))..))))))))).	6852	6878	0.923077	-23.9	1	2.77613e-05	0.426	0.0501111	0.14465	-8.3038	16	21	9	3UTR		0	0
hsa-miR-1178-3p	NM_001257414	IKZF3	..(((((((((.(((((((..&)).)))))..))))))))).	5310	5330	0.923077	-22.9	1	9.89899e-07	0.338	0.369635	0.214314	-8.3038	16	20	9	3UTR		0	0
hsa-miR-1178-3p	NM_001257414	IKZF3	(((((((((.(((((((((((&))))))))).)).)))))............)))).	4854	4889	0.923077	-22.1	1	0.0200985	0.426	0.131899	-0.0852331	-5.18008	20	35	9	3UTR		0	0
hsa-miR-1178-3p	NM_001257962	PDLIM3	..((((.(((.((((((.(((&))).))))))))))))).	1836	1854	0.846154	-18.9	1	3.08803e-06	0.471	4.39018	3.44299	-9.32546	16	18	13	3UTR		0	0
hsa-miR-1178-3p	NM_001257963	PDLIM3	..((((.(((.((((((.(((&))).))))))))))))).	1599	1617	0.846154	-18.9	1	3.08803e-06	0.471	0.373424	1.21888	-9.32546	16	18	13	3UTR		0	0
hsa-miR-1178-3p	NM_001257964	BOD1L2	..((((.(((((((((((((.&)))))......)))))))))))).	353	377	1	-21	1	0.000311249	0.412	2.88301	2.04834	-6.50069	17	24	12	CDS		0	0
hsa-miR-1178-3p	NM_001257964	BOD1L2	.(((((((.((((..((((((&))))))..))))..))...))))).	2046	2071	0.846154	-20.1	1	0.00371879	0.471	-1.0258	-0.281687	-6.442	17	25	6	3UTR		0	0
hsa-miR-1178-3p	NM_001257964	BOD1L2	..(((((((((((((......&)))))))).))))).	2610	2625	1	-16.5	1	0.000939085	0.574	2.3801	2.33503	-5.19005	13	15	8	3UTR		0	0
hsa-miR-1178-3p	NM_001257966	CRB1	.(((((.(((((((.(((((.&))))).))))))).))..))).	32	54	0.846154	-20.7	1	0.000562205	0.397	1.06935	0.908586	-6.07246	17	22	7	5UTR		0	0
hsa-miR-1178-3p	NM_001257967	ITPRID1	(((((((((((...(((((((&)))))))...)))))))).))).	4957	4980	0.846154	-24.8	1	0.000227281	0.426	-0.380118	-0.14806	-9.43035	18	23	8	3UTR		0	0
hsa-miR-1178-3p	NM_001257967	ITPRID1	(((((((((((((((((((((&)))))))......)))).....)))))))))).	4000	4033	0.923077	-22.7	1	0.000114017	0.618	-0.226274	-0.00710424	-3.93757	21	33	10	3UTR		0	0
hsa-miR-1178-3p	NM_001257967	ITPRID1	((((((....(((((((((..&)))))))))...)))))).	2837	2856	0.846154	-21.4	1	0.00267655	0.397	3.05461	1.21257	-10.0938	15	19	9	CDS		0	0
hsa-miR-1178-3p	NM_001257967	ITPRID1	.(((((((..((((((((((.&))))))).)))..))))))).	3699	3720	1	-20.6	1	0.0117964	0.529	-0.0434754	-0.113612	-6.09222	17	21	7	3UTR		0	0
hsa-miR-1178-3p	NM_001257968	ITPRID1	((((((....(((((((((..&)))))))))...)))))).	2799	2818	0.846154	-21.4	1	0.00267655	0.397	3.05461	1.21257	-10.0938	15	19	9	CDS		0	0
hsa-miR-1178-3p	NM_001257968	ITPRID1	((((.((((.((((((.((((&)))).)))))))))).)))).	787	808	0.846154	-19.4	1	0.00307182	0.485	0.29826	0.793671	-9.29912	18	21	10	CDS		0	0
hsa-miR-1178-3p	NM_001257970	CARD14	..((.(.((((((((((((..&))))))))))))))).	407	423	1	-22.4	1	3.35434e-05	0.441	3.03088	2.82902	-10.6197	15	16	15	CDS		0	0
hsa-miR-1178-3p	NM_001257973	CTSL	.(((.(.((((((((((((((&))))))..)))))))))))).	617	638	0.846154	-18.7	1	0.13843	0.456	3.18819	2.36053	-9.45605	18	21	12	CDS		0	0
hsa-miR-1178-3p	NM_001257975	CIZ1	..((((((((.((((((((((&))))))))))..)))....))))).	2115	2140	1	-24	1	0.00456728	0.338	1.41563	0.366428	-7.78178	18	25	10	CDS		0	0
hsa-miR-1178-3p	NM_001257976	CIZ1	..((((((((.((((((((((&))))))))))..)))....))))).	1890	1915	0.846154	-24	1	0.00456728	0.338	0.184752	-0.565181	-7.78178	18	25	10	CDS		0	0
hsa-miR-1178-3p	NM_001257994	TRMT2A	..((((((((((((((((((.&)))))))))..)))..)))))).	1075	1098	0.846154	-23.1	1	0.0012593	0.338	2.5344	4.38586	-4.957	18	23	9	CDS		0	0
hsa-miR-1178-3p	NM_001257998	VPS50	..((.(((((((((((.....&))))))))))))).	3327	3341	1	-20.2	1	0.0427547	0.721	1.15582	0.848949	-9.07604	13	14	13	3UTR		0	0
hsa-miR-1178-3p	NM_001257998	VPS50	(((((...(((.(((((((((&))))))))).))).))))).	5397	5417	1	-20.1	1	0.00313889	0.647	0.558574	0.511846	-13.0427	17	20	9	3UTR		0	0
hsa-miR-1178-3p	NM_001257998	VPS50	..((((.((((((((((((((&)))).))))))).......))))))).	700	727	0.923077	-20	1	0.000197046	0.588	5.42948	5.6439	-6.50069	18	27	7	CDS		0	0
hsa-miR-1178-3p	NM_001257999	ANKFY1	(((((((((((((((((((..&)).)))))))))))....)))))).	7398	7423	0.807692	-22.9	1	0.000341846	0.412	5.06157	3.92637	-3.93757	19	25	11	3UTR		0	0
hsa-miR-1178-3p	NM_001257999	ANKFY1	..(((((.(((((((((....&))))))))).))))).	5889	5905	0.923077	-19.7	1	0.000136025	0.485	1.68055	3.28671	-7.27064	14	16	9	3UTR		0	0
hsa-miR-1178-3p	NM_001258	CDK3	((.(((.((((((((((((..&))))))))............................))))))).)).	1379	1426	0.923077	-19	1	0.00750728	0.426	0.211019	0.0910129	-7.0388	17	47	8	3UTR		0	0
hsa-miR-1178-3p	NM_001258002	CHIA	((((((.(((((((((((...&.))))...))))))))))))).	893	931	0.923077	-21.3	1	4.83615e-05	0.294	-0.1208	0.442809	-5.48126	17	22	13	CDS		0	0
hsa-miR-1178-3p	NM_001258002	CHIA	.(((((..(((((((((.(((&)))..)))))))))...))))).	420	443	0.923077	-19.5	1	0.00109872	0.529	2.63564	2.34518	-7.65065	17	23	9	CDS		0	0
hsa-miR-1178-3p	NM_001258005	CHIA	((((((.(((((((((((...&.))))...))))))))))))).	1155	1193	0.923077	-21.3	1	4.83615e-05	0.294	-0.1208	0.442809	-5.48126	17	22	13	CDS		0	0
hsa-miR-1178-3p	NM_001258005	CHIA	.(((((..(((((((((.(((&)))..)))))))))...))))).	682	705	0.923077	-19.5	1	0.00109872	0.529	2.63564	2.34518	-7.65065	17	23	9	CDS		0	0
hsa-miR-1178-3p	NM_001258008	ZCWPW1	..((((.(((((((.((((((&)))))).))))))).)))).	1933	1953	1	-26.2	1	1.1034e-05	0.382	1.12027	0.780052	-7.23614	17	20	7	3UTR		0	0
hsa-miR-1178-3p	NM_001258014	FDXR	..((.(((.((((((((((((&))))))...))))))))))).	569	590	0.846154	-19.1	1	7.11211e-05	0.353	3.96877	3.90343	-10.1324	17	21	11	CDS		0	0
hsa-miR-1178-3p	NM_001258015	FDXR	((((((...((((((((((..&))).)))))))....)))))).	315	337	0.846154	-20.6	1	0.000132071	0.353	0.847754	1.12033	-8.85129	16	22	7	CDS		0	0
hsa-miR-1178-3p	NM_001258016	FDXR	((.(((.((((((((((((..&))))).........)))))))))).)).	19	47	0.846154	-19.7	1	0.383187	0.426	-0.175364	-0.453757	-7.0388	17	28	10	5UTR		0	0
hsa-miR-1178-3p	NM_001258018	IL4I1	.(((((.((((((((((....&))))))))))))))).	2223	2239	0.846154	-22.7	1	7.55016e-05	0.294	1.45769	1.42004	-5.33701	15	16	15	CDS		0	0
hsa-miR-1178-3p	NM_001258019	GRIA1	..(((((((((((((((((..&)).))))))))))))).)).	784	804	0.846154	-23.8	1	0.00648124	0.441	3.97548	3.74952	-4.957	17	20	13	CDS		0	0
hsa-miR-1178-3p	NM_001258019	GRIA1	((((.((((((((((((((..&)))).)))))))).)).)))).	3404	3426	0.923077	-21.6	1	0.000168754	0.412	0.39812	0.663862	-8.05661	18	22	8	3UTR		0	0
hsa-miR-1178-3p	NM_001258019	GRIA1	..(((((((((((((((.(((&))).)))))))))).)).))).	1424	1446	0.884615	-21.4	1	0.000313902	0.471	5.65429	4.16913	-4.957	18	22	10	CDS		0	0
hsa-miR-1178-3p	NM_001258021	GRIA1	..(((((((((((((((((..&)).))))))))))))).)).	862	882	0.846154	-23.8	1	0.00648124	0.441	3.94806	3.64912	-4.957	17	20	13	CDS		0	0
hsa-miR-1178-3p	NM_001258021	GRIA1	((((.((((((((((((((..&)))).)))))))).)).)))).	3482	3504	0.846154	-21.6	1	0.000168754	0.412	0.312144	0.176147	-8.05661	18	22	8	3UTR		0	0
hsa-miR-1178-3p	NM_001258021	GRIA1	..(((((((((((((((.(((&))).)))))))))).)).))).	1502	1524	0.884615	-21.4	1	0.000313902	0.471	5.54548	5.32253	-4.957	18	22	10	CDS		0	0
hsa-miR-1178-3p	NM_001258022	GRIA1	..(((((((((((((((((..&)).))))))))))))).)).	862	882	0.846154	-23.8	1	0.00648124	0.441	3.94806	3.64912	-4.957	17	20	13	CDS		0	0
hsa-miR-1178-3p	NM_001258022	GRIA1	((((.((((((((((((((..&)))).)))))))).)).)))).	3482	3504	0.846154	-21.6	1	0.000168754	0.412	0.312144	0.176147	-8.05661	18	22	8	3UTR		0	0
hsa-miR-1178-3p	NM_001258022	GRIA1	(((((((((((((..((((((&)))).))....)))...)))))))))).	2340	2368	0.961538	-21.5	1	0.0104322	0.529	7.76513	6.98585	-5.52986	19	28	10	CDS		0	0
hsa-miR-1178-3p	NM_001258023	GRIA1	..(((((((((((((((((..&)).))))))))))))).)).	759	779	0.846154	-23.8	1	0.00648124	0.441	3.94806	3.64912	-4.957	17	20	13	CDS		0	0
hsa-miR-1178-3p	NM_001258023	GRIA1	((((.((((((((((((((..&)))).)))))))).)).)))).	3379	3401	0.846154	-21.6	1	0.000168754	0.412	0.312144	0.176147	-8.05661	18	22	8	3UTR		0	0
hsa-miR-1178-3p	NM_001258023	GRIA1	..(((((((((((((((.(((&))).)))))))))).)).))).	1399	1421	0.884615	-21.4	1	0.000313902	0.471	5.54548	5.32253	-4.957	18	22	10	CDS		0	0
hsa-miR-1178-3p	NM_001258028	TKT	..(((((((.(((((((((((&))))))))))).)).))))).	2879	2900	0.846154	-25.1	1	7.58781e-05	0.353	0	0	-6.19951	18	21	11	3UTR		0	0
hsa-miR-1178-3p	NM_001258028	TKT	.(.(((((..(((((((((((&)))))))))))..))).)).).	2134	2156	0.923077	-22.6	1	0.00123785	0.368	0.23623	0.495674	-7.64976	17	22	11	3UTR		0	0
hsa-miR-1178-3p	NM_001258030	GSN	...((((((((((((......&)))))))))))).	1212	1225	0.846154	-17	1	6.13001e-07	0.441	3.84077	4.82022	-6.74759	12	13	12	CDS		0	0
hsa-miR-1178-3p	NM_001258031	SERINC4	((((((((((..((((((...&)))))).)))))))))).	2240	2258	0.923077	-26	1	1.69612e-05	0.456	1.43104	1.47131	-10.1092	16	18	10	3UTR		0	0
hsa-miR-1178-3p	NM_001258033	POLR3E	((((((((.((((((((....&))))))))..)))))))).	1660	1679	0.923077	-23.5	1	0.000266703	0.279	5.44537	1.26043	-4.99396	16	19	8	CDS		0	0
hsa-miR-1178-3p	NM_001258033	POLR3E	..((((..(((((((((((..&))).))))))))..)))).	861	880	0.846154	-21.2	1	0.000774826	0.382	2.83755	4.82417	-8.81432	15	19	8	CDS		0	0
hsa-miR-1178-3p	NM_001258034	POLR3E	((((((((.((((((((....&))))))))..)))))))).	1552	1571	0.846154	-23.5	1	0.000266703	0.279	0	0	-4.99396	16	19	8	CDS		0	0
hsa-miR-1178-3p	NM_001258034	POLR3E	..((((..(((((((((((..&))).))))))))..)))).	753	772	1	-21.2	1	0.000774826	0.382	0	0	-8.81432	15	19	8	CDS		0	0
hsa-miR-1178-3p	NM_001258034	POLR3E	(((((..((((((((((((..&)))..)))))))))..))))).	1581	1603	0.846154	-21.1	1	0.0478244	0.294	0	0	-7.38222	17	22	9	CDS		0	0
hsa-miR-1178-3p	NM_001258035	POLR3E	((((((((.((((((((....&))))))))..)))))))).	1586	1605	0.846154	-23.5	1	0.000266703	0.279	0	0	-4.99396	16	19	8	CDS		0	0
hsa-miR-1178-3p	NM_001258035	POLR3E	..((((..(((((((((((..&))).))))))))..)))).	787	806	1	-21.2	1	0.000774826	0.382	0	0	-8.81432	15	19	8	CDS		0	0
hsa-miR-1178-3p	NM_001258035	POLR3E	(((((..((((((((((((..&)))..)))))))))..))))).	1615	1637	0.846154	-21.1	1	0.0478244	0.294	0	0	-7.38222	17	22	9	CDS		0	0
hsa-miR-1178-3p	NM_001258036	POLR3E	((((((((.((((((((....&))))))))..)))))))).	1660	1679	0.846154	-23.5	1	0.000266703	0.279	0	0	-4.99396	16	19	8	CDS		0	0
hsa-miR-1178-3p	NM_001258036	POLR3E	..((((..(((((((((((..&))).))))))))..)))).	861	880	1	-21.2	1	0.000774826	0.382	0	0	-8.81432	15	19	8	CDS		0	0
hsa-miR-1178-3p	NM_001258036	POLR3E	(((((..((((((((((((..&)))..)))))))))..))))).	1689	1711	0.846154	-21.1	1	0.0478244	0.294	0	0	-7.38222	17	22	9	CDS		0	0
hsa-miR-1178-3p	NM_001258038	SPRY1	..(((((((((((((......&)))))).))))))).	1644	1659	0.846154	-17.3	1	6.13084e-07	0.515	0	0	-5.19005	13	15	7	3UTR		0	0
hsa-miR-1178-3p	NM_001258039	SPRY1	..(((((((((((((......&)))))).))))))).	1388	1403	0.846154	-17.3	1	6.13084e-07	0.515	1.43467	0.779376	-5.19005	13	15	7	3UTR		0	0
hsa-miR-1178-3p	NM_001258041	HARS1	.(((((((((.((((((((((&)))).))).........))).))))))))).	1081	1112	0.846154	-19	1	0.000559098	0.397	4.01208	3.8423	-6.6181	19	31	9	CDS		0	0
hsa-miR-1178-3p	NM_001258205	TRPV3	.(((...((.(((((((((((&))))))))))).))....))).	3034	3056	1	-22.1	1	0.00801704	0.397	-0.0791878	-0.324576	-12.5995	16	22	11	3UTR		0	0
hsa-miR-1178-3p	NM_001258205	TRPV3	(((((((((((((((((((((&)))).....)))))))))).............))))))).	4232	4272	0.923077	-21.9	1	0.00170873	0.574	3.34925	3.13345	-3.93757	21	40	10	3UTR		0	0
hsa-miR-1178-3p	NM_001258205	TRPV3	((.(((.((((((((((((((&))))....))))))))))..))).)).	457	484	0.923077	-21.9	1	0.098418	0.426	0.346353	0.589161	-7.0388	19	27	10	CDS		0	0
hsa-miR-1178-3p	NM_001258205	TRPV3	..(((((((..(((((((...&)))))))))))))).	4081	4096	0.923077	-21.8	1	0.0191211	0.382	3.2346	4.53357	-9.02428	14	15	14	3UTR		0	0
hsa-miR-1178-3p	NM_001258206	VAV1	.(((((.(((((((((((...&))).)))))))).))))).	2066	2085	0.923077	-23.1	1	2.25708e-06	0.324	1.75594	2.82873	-5.33701	16	19	8	CDS		0	0
hsa-miR-1178-3p	NM_001258206	VAV1	(((((((.(((((((((((((&)))))))))................))))))))))).	1771	1808	0.846154	-22.2	1	2.99525e-05	0.456	2.43641	2.25742	-6.25121	20	37	11	CDS		0	0
hsa-miR-1178-3p	NM_001258207	VAV1	.(((((.(((((((((((...&))).)))))))).))))).	2036	2055	0.846154	-23.1	1	2.73011e-06	0.324	1.75594	2.82873	-5.33701	16	19	8	CDS		0	0
hsa-miR-1178-3p	NM_001258207	VAV1	(((((((.(((((((((((((&)))))))))................))))))))))).	1675	1712	0.846154	-22.2	1	2.99525e-05	0.456	2.43641	2.25742	-6.25121	20	37	11	CDS		0	0
hsa-miR-1178-3p	NM_001258207	VAV1	.......((((((((((((((&)))).)))))))))).	1908	1924	0.846154	-18.6	0	0.000819837	0.529	5.76808	2.91448	-17.1102	14	16	10	CDS		0	0
hsa-miR-1178-3p	NM_001258208	HMBS	..((.((((((.(((((....&.)))))..)))))).)).	796	824	0.846154	-18.4	1	2.11255e-06	0.441	7.04298	3.93722	-12.4228	13	18	6	CDS		0	0
hsa-miR-1178-3p	NM_001258209	HMBS	..((.((((((.(((((....&.)))))..)))))).)).	887	915	0.846154	-18.4	1	2.11255e-06	0.441	7.04298	3.93722	-12.4228	13	18	6	CDS		0	0
hsa-miR-1178-3p	NM_001258210	TSKU	..((((((((((((.......&.)))))))))))).	2594	2618	0.923077	-20.2	1	4.18798e-05	0.338	0.323548	0.447066	-5.9255	12	14	12	3UTR		0	0
hsa-miR-1178-3p	NM_001258211	FBXO16	..((((((.((((((((((((&))))....))))))))...).))))).	371	398	0.923077	-19	1	0.00258956	0.485	1.2227	1.28269	-6.01339	18	27	8	CDS		0	0
hsa-miR-1178-3p	NM_001258213	PCID2	(((((((((..(((((.....&.)))))..))))))))).	1818	1843	1	-20.3	1	3.98886e-05	0.485	-0.0287622	1.45061	-8.00486	14	18	9	3UTR		0	0
hsa-miR-1178-3p	NM_001258213	PCID2	((((((((.(((((.......&.))))).)))))))).	1445	1474	1	-18.4	1	0.000289663	0.397	5.85326	4.82727	-5.96246	13	16	8	CDS		0	0
hsa-miR-1178-3p	NM_001258214	IL12RB2	..((((.((((((((((((..&)))....))))))))))))).	2930	2951	0.871795	-20.2	1	1.02754e-05	0.412	0.748429	0.225542	-6.50069	16	21	13	3UTR		0	0
hsa-miR-1178-3p	NM_001258214	IL12RB2	...(((.((((((.(((((..&)))))))))))))).	1131	1146	0.923077	-19.6	1	0.000719149	0.485	0.321455	1.42612	-8.91507	14	15	14	CDS		0	0
hsa-miR-1178-3p	NM_001258215	IL12RB2	..((((.((((((((((((..&)))....))))))))))))).	2684	2705	0.871795	-20.2	1	1.02754e-05	0.412	0.748429	0.225542	-6.50069	16	21	13	CDS		0	0
hsa-miR-1178-3p	NM_001258215	IL12RB2	...(((.((((((.(((((..&)))))))))))))).	1043	1058	0.923077	-19.6	1	0.000719149	0.485	0.321455	1.42612	-8.91507	14	15	14	CDS		0	0
hsa-miR-1178-3p	NM_001258216	IL12RB2	..((((.((((((((((((..&)))....))))))))))))).	2751	2772	0.871795	-20.2	1	1.02754e-05	0.412	0.748429	0.225542	-6.50069	16	21	13	3UTR		0	0
hsa-miR-1178-3p	NM_001258216	IL12RB2	...(((.((((((.(((((..&)))))))))))))).	1043	1058	0.923077	-19.6	1	0.000719149	0.485	0.321455	1.42612	-8.91507	14	15	14	CDS		0	0
hsa-miR-1178-3p	NM_001258221	KCTD1	(((((.((((((((((((((.&))))))))))............))))..))))).	768	802	0.923077	-19.2	1	0.000618318	0.382	0.860601	2.39907	-5.83853	19	34	10	CDS		0	0
hsa-miR-1178-3p	NM_001258222	KCTD1	(((((.((((((((((((((.&))))))))))............))))..))))).	791	825	0.923077	-19.2	1	0.000618318	0.382	1.09155	3.17467	-5.83853	19	34	10	CDS		0	0
hsa-miR-1178-3p	NM_001258240	TMEM218	..(((((((((((((((((..&)))))...)).))))))))...)).	969	994	0.846154	-18.6	1	0.00269449	0.618	0.295068	-0.203649	-4.957	17	25	8	3UTR		0	0
hsa-miR-1178-3p	NM_001258241	TMEM218	..(((((((((((((((((..&)))))...)).))))))))...)).	910	935	0.846154	-18.6	1	0.00269449	0.618	-0.0554098	0.114117	-4.957	17	25	8	3UTR		0	0
hsa-miR-1178-3p	NM_001258245	TMEM218	..((((.((((((((((((((&))))))))))...................)))).)))).	53	92	0.897436	-22.4	1	0.00316668	0.397	-0.195079	0.279592	-6.50069	18	39	10	5UTR		0	0
hsa-miR-1178-3p	NM_001258247	TMEM218	..(((((((((((((((((..&)))))...)).))))))))...)).	840	865	0.846154	-18.6	1	0.00269449	0.618	0.0198777	-0.0899383	-4.957	17	25	8	3UTR		0	0
hsa-miR-1178-3p	NM_001258247	TMEM218	..(((((.((((.((((((((&))))))))...))))..))))).	903	926	0.807692	-17.1	1	0.000441465	0.662	0.245741	0.0245509	-8.55977	17	23	8	3UTR		0	0
hsa-miR-1178-3p	NM_001258249	UTY	..((((..(((.(((((((((&)))))))))..))))))).	3711	3730	0.923077	-21	1	0.00176661	0.485	0	0	-12.1611	16	19	9	CDS		0	0
hsa-miR-1178-3p	NM_001258251	UTY	..((((..(((.(((((((((&)))))))))..))))))).	3468	3487	0.923077	-21	1	0.00176661	0.485	0	0	-12.1611	16	19	9	CDS		0	0
hsa-miR-1178-3p	NM_001258252	UTY	..((((..(((.(((((((((&)))))))))..))))))).	3555	3574	0.923077	-21	1	0.00176661	0.485	0	0	-12.1611	16	19	9	CDS		0	0
hsa-miR-1178-3p	NM_001258254	UTY	..((((..(((.(((((((((&)))))))))..))))))).	3183	3202	0.923077	-21	1	0.00176661	0.485	0	0	-12.1611	16	19	9	CDS		0	0
hsa-miR-1178-3p	NM_001258256	UTY	..((((..(((.(((((((((&)))))))))..))))))).	3555	3574	0.923077	-21	1	0.00176661	0.485	0	0	-12.1611	16	19	9	CDS		0	0
hsa-miR-1178-3p	NM_001258258	UTY	..((((..(((.(((((((((&)))))))))..))))))).	3576	3595	0.923077	-21	1	0.00176661	0.485	0	0	-12.1611	16	19	9	CDS		0	0
hsa-miR-1178-3p	NM_001258261	UTY	..((((..(((.(((((((((&)))))))))..))))))).	3546	3565	0.923077	-21	1	0.00176661	0.485	0	0	-12.1611	16	19	9	CDS		0	0
hsa-miR-1178-3p	NM_001258265	UTY	..((((..(((.(((((((((&)))))))))..))))))).	3171	3190	0.923077	-21	1	0.00176661	0.485	0	0	-12.1611	16	19	9	CDS		0	0
hsa-miR-1178-3p	NM_001258266	UTY	..((((..(((.(((((((((&)))))))))..))))))).	3555	3574	0.923077	-21	1	0.00176661	0.485	0	0	-12.1611	16	19	9	CDS		0	0
hsa-miR-1178-3p	NM_001258271	MLH1	(((((((...(((((((....&.))))))).....))))))).	1540	1579	0.923077	-17.8	1	0.097819	0.544	0.522324	0.602248	-8.55011	14	21	7	CDS		0	0
hsa-miR-1178-3p	NM_001258273	MLH1	(((((((...(((((((....&.))))))).....))))))).	1449	1488	0.923077	-17.8	1	0.097819	0.544	0.522324	0.602248	-8.55011	14	21	7	CDS		0	0
hsa-miR-1178-3p	NM_001258274	MLH1	(((((((...(((((((....&.))))))).....))))))).	1912	1951	0.923077	-17.8	1	0.097819	0.544	0.522324	0.602248	-8.55011	14	21	7	CDS		0	0
hsa-miR-1178-3p	NM_001258275	SAMD3	.....((((.(((((((((((&))))))))))).)))).	908	925	0.846154	-23.4	1	8.46725e-07	0.471	1.80512	1.87772	-14.9081	15	17	11	5UTR		0	0
hsa-miR-1178-3p	NM_001258280	ZNF501	(((((((((((.((((((...&.))))))...))))))))))).	51	97	0.846154	-23.7	1	6.48477e-05	0.235	-0.480069	-0.927591	-7.28438	17	22	11	5UTR		0	0
hsa-miR-1178-3p	NM_001258281	MSH2	((((((.(((((...(((((.&.)))))..))))))))))).	123	159	0.923077	-20.5	1	0.000239245	0.485	1.5066	2.88509	-8.36268	16	20	11	5UTR		0	0
hsa-miR-1178-3p	NM_001258281	MSH2	....(((((((((.(((((..&))))))))))).))).	686	702	0.846154	-18.6	1	0.00893899	0.559	2.80697	4.5674	-10.4034	14	16	11	CDS		0	0
hsa-miR-1178-3p	NM_001258283	OR2V1	.(((((.(((((((((((((.&.)))))))).)))))))))).	1115	1144	1	-22	1	0.00306296	0.426	0	0	-5.33701	18	21	10	CDS		0	0
hsa-miR-1178-3p	NM_001258284	OR2L5	((((((((((((..((((((.&))))))....))))...)))))))).	2218	2244	0.923077	-20	1	3.79799e-05	0.603	0	0	-6.08354	18	26	8	3UTR		0	0
hsa-miR-1178-3p	NM_001258286	SLC38A9	((((((.((.(((((((((((&)))))).))))).)))))))).	2199	2221	1	-18.8	1	0.00279588	0.647	4.25656	1.96484	-6.72377	19	22	8	3UTR		0	0
hsa-miR-1178-3p	NM_001258286	SLC38A9	..((.((((((..((((((..&)))))))))))))).	2164	2179	0.961538	-16.8	1	0.00213166	0.662	2.67393	4.00533	-13.712	14	15	14	3UTR		0	0
hsa-miR-1178-3p	NM_001258287	SLC38A9	((((((.((.(((((((((((&)))))).))))).)))))))).	2195	2217	0.846154	-18.8	1	0.00279588	0.647	0.309706	0.441407	-6.72377	19	22	8	3UTR		0	0
hsa-miR-1178-3p	NM_001258287	SLC38A9	..((.((((((..((((((..&)))))))))))))).	2160	2175	1	-16.8	1	0.00213166	0.662	0.0963992	0.647706	-13.712	14	15	14	3UTR		0	0
hsa-miR-1178-3p	NM_001258288	SELENBP1	..(((..(((((.((((((..&)))))))))))..))).	1013	1030	0.846154	-17.8	1	5.42341e-07	0.382	3.55336	3.52229	-9.69078	14	17	11	CDS		0	0
hsa-miR-1178-3p	NM_001258292	NFATC2	.((((((((.(((((((((..&.))))).)))).).))))))).	3264	3296	0.923077	-22.7	1	0.0130287	0.412	-0.754467	-0.549066	-5.03583	17	22	7	3UTR		0	0
hsa-miR-1178-3p	NM_001258292	NFATC2	((((((((((((.((((((((&)))))))).)))...........))))))))).	4894	4927	0.923077	-21.2	1	0.00139282	0.485	3.22925	3.78178	-5.22671	20	33	9	3UTR		0	0
hsa-miR-1178-3p	NM_001258294	NFATC2	.((((((((.(((((((((..&.))))).)))).).))))))).	2838	2870	0.923077	-22.7	1	0.0130287	0.412	-0.122932	-0.506036	-5.03583	17	22	7	3UTR		0	0
hsa-miR-1178-3p	NM_001258294	NFATC2	((((((((((((.((((((((&)))))))).)))...........))))))))).	4468	4501	0.923077	-21.2	1	0.00139282	0.485	3.67765	3.91166	-5.22671	20	33	9	3UTR		0	0
hsa-miR-1178-3p	NM_001258294	NFATC2	((((((((((.((((((.(((&))).).))))))))))))))).	1099	1121	0.846154	-20.4	1	6.0301e-05	0.471	0.433943	-0.30436	-6.76235	19	22	15	CDS		0	0
hsa-miR-1178-3p	NM_001258296	NFATC2	.((((((((.(((((((((..&.))))).)))).).))))))).	2908	2940	0.923077	-22.7	1	0.0130287	0.412	-0.496522	-0.498419	-5.03583	17	22	7	3UTR		0	0
hsa-miR-1178-3p	NM_001258296	NFATC2	((((((((((((.((((((((&)))))))).)))...........))))))))).	4538	4571	0.923077	-21.2	1	0.00139282	0.485	5.3443	4.56949	-5.22671	20	33	9	3UTR		0	0
hsa-miR-1178-3p	NM_001258296	NFATC2	((((((((((.((((((.(((&))).).))))))))))))))).	1169	1191	0.846154	-20.4	1	6.0301e-05	0.471	-0.169115	-0.436278	-6.76235	19	22	15	CDS		0	0
hsa-miR-1178-3p	NM_001258298	SHTN1	.(((((((....((((((((.&))))))))))))))).	6672	6688	0.923077	-21.3	1	6.63476e-05	0.368	0	0	-12.2638	15	16	15	3UTR		0	0
hsa-miR-1178-3p	NM_001258298	SHTN1	(((((((((..(((((.....&)))))..))))))))).	5118	5135	1	-19.5	1	0.000939569	0.515	0.537965	-0.287961	-8.00486	14	17	9	3UTR		0	0
hsa-miR-1178-3p	NM_001258305	CCDC74A	((((.((((((...((((...&)))).)))))))))).	43	59	0.923077	-18.1	1	1.1902e-05	0.324	-0.233288	-0.273091	-13.5494	14	16	10	5UTR		0	0
hsa-miR-1178-3p	NM_001258308	NOP2	..((((.((((((((((((((&)))))))...))))))))).)).	759	782	0.923077	-22.1	1	0.000711542	0.397	1.21515	2.62826	-6.50069	18	23	9	CDS		0	0
hsa-miR-1178-3p	NM_001258309	NOP2	..((((.((((((((((((((&)))))))...))))))))).)).	858	881	0.807692	-22.1	1	0.000711542	0.397	3.17053	4.72067	-6.50069	18	23	9	CDS		0	0
hsa-miR-1178-3p	NM_001258310	NOP2	..((((.((((((((((((((&)))))))...))))))))).)).	747	770	0.923077	-22.1	1	0.000711542	0.397	0.0581283	0.292769	-6.50069	18	23	9	CDS		0	0
hsa-miR-1178-3p	NM_001258311	PGBD5	..(((((((((((((((((..&)))).))))))))))))).	9853	9872	1	-23.3	1	0.00347972	0.397	6.48921	5.24292	-4.957	17	19	13	3UTR		0	0
hsa-miR-1178-3p	NM_001258311	PGBD5	..((.(((((.((((((((((&))))))))))...))))))).	4489	4510	0.846154	-23.6	1	5.88445e-07	0.412	-0.326091	-0.305981	-11.9008	17	21	10	3UTR		0	0
hsa-miR-1178-3p	NM_001258320	TP53I11	((((.(((((((((((((...&)))))))..)))))))))).	3435	3455	0.923077	-23.7	1	0.0402474	0.412	0.142348	0.0936148	-8.05661	17	20	10	3UTR		0	1
hsa-miR-1178-3p	NM_001258320	TP53I11	..((((.((((((((((((..&))).))))))))))))).	3456	3474	1	-22.6	1	0.000157133	0.353	0.042263	0.18697	-6.50069	16	18	13	3UTR		0	1
hsa-miR-1178-3p	NM_001258321	TP53I11	((((.(((((((((((((...&)))))))..)))))))))).	3407	3427	0.923077	-23.7	1	0.0402474	0.412	0.204868	-0.0892503	-8.05661	17	20	10	3UTR		0	1
hsa-miR-1178-3p	NM_001258321	TP53I11	..((((.((((((((((((..&))).))))))))))))).	3428	3446	1	-22.6	1	0.000157133	0.353	0.0489739	-0.469243	-6.50069	16	18	13	3UTR		0	1
hsa-miR-1178-3p	NM_001258323	TP53I11	((((.(((((((((((((...&)))))))..)))))))))).	3143	3163	0.846154	-23.7	1	0.0402474	0.412	-0.0972055	1.09564	-8.05661	17	20	10	3UTR		0	1
hsa-miR-1178-3p	NM_001258323	TP53I11	..((((.((((((((((((..&))).))))))))))))).	3164	3182	1	-22.6	1	0.000157133	0.353	0.698051	0.143565	-6.50069	16	18	13	3UTR		0	1
hsa-miR-1178-3p	NM_001258323	TP53I11	.(((.((((.(((((((((((&))).)))).)))).))))))).	2927	2949	0.846154	-19.5	1	8.36657e-06	0.382	4.10083	4.74426	-9.15487	18	22	7	3UTR		0	1
hsa-miR-1178-3p	NM_001258324	TP53I11	((((.(((((((((((((...&)))))))..)))))))))).	3291	3311	0.923077	-23.7	1	0.0402474	0.412	0.204868	-0.0892503	-8.05661	17	20	10	3UTR		0	1
hsa-miR-1178-3p	NM_001258324	TP53I11	..((((.((((((((((((..&))).))))))))))))).	3312	3330	1	-22.6	1	0.000157133	0.353	0.0489739	-0.469243	-6.50069	16	18	13	3UTR		0	1
hsa-miR-1178-3p	NM_001258324	TP53I11	.(((.((((.(((((((((((&))).)))).)))).))))))).	3075	3097	0.923077	-19.5	1	8.36657e-06	0.382	5.39142	3.51405	-9.15487	18	22	7	3UTR		0	1
hsa-miR-1178-3p	NM_001258325	SFI1	((((((.((((((((.(((..&))).)))))))).)))))).	2866	2886	0.923077	-22.8	1	0.00146134	0.324	2.08633	1.82056	-5.71431	17	20	8	CDS		0	0
hsa-miR-1178-3p	NM_001258326	SFI1	((((((.((((((((.(((..&))).)))))))).)))))).	2384	2404	0.923077	-22.8	1	0.00146134	0.324	2.08633	1.82056	-5.71431	17	20	8	CDS		0	0
hsa-miR-1178-3p	NM_001258329	EPB41L1	((((((((((((((((.....&)))))))).)))))))).	912	930	0.907692	-22	1	0.000101082	0.426	3.90913	5.36563	-3.93757	16	18	8	CDS		0	1
hsa-miR-1178-3p	NM_001258329	EPB41L1	((((((.(((..((((((...&))))))..)))..)))))).	5206	5226	0.923077	-22.4	1	0.000199991	0.426	0.94037	0.140103	-11.6528	15	20	6	3UTR		0	1
hsa-miR-1178-3p	NM_001258330	EPB41L1	((((((((((((((((.....&)))))))).)))))))).	774	792	0.907692	-22	1	0.000101082	0.426	3.90913	5.36563	-3.93757	16	18	8	CDS		0	1
hsa-miR-1178-3p	NM_001258330	EPB41L1	((((((.(((..((((((...&))))))..)))..)))))).	4624	4644	0.923077	-22.4	1	0.000199991	0.426	0.94037	0.140103	-11.6528	15	20	6	3UTR		0	1
hsa-miR-1178-3p	NM_001258331	EPB41L1	((((((((((((((((.....&)))))))).)))))))).	764	782	0.907692	-22	1	0.000101082	0.426	3.90913	5.36563	-3.93757	16	18	8	CDS		0	1
hsa-miR-1178-3p	NM_001258331	EPB41L1	((((((.(((..((((((...&))))))..)))..)))))).	4941	4961	0.923077	-22.4	1	0.000199991	0.426	0.94037	0.140103	-11.6528	15	20	6	3UTR		0	1
hsa-miR-1178-3p	NM_001258333	HAL	((.(((((((((((((((((.&)))))))))).)))).....))).)).	1582	1609	0.923077	-21.8	1	0.000214437	0.485	0.811889	1.81673	-5.49511	19	27	10	CDS		0	0
hsa-miR-1178-3p	NM_001258333	HAL	(((((..((((((((((....&))))))))))..))))).	1882	1900	0.846154	-19	1	0.00129995	0.382	4.8235	4.80481	-7.38222	15	18	10	CDS		0	0
hsa-miR-1178-3p	NM_001258334	HAL	((.(((((((((((((((((.&)))))))))).)))).....))).)).	1649	1676	0.846154	-21.8	1	0.000214437	0.485	3.64747	3.25484	-5.49511	19	27	10	CDS		0	0
hsa-miR-1178-3p	NM_001258334	HAL	(((((..((((((((((....&))))))))))..))))).	1949	1967	0.846154	-19	1	0.00129995	0.382	5.61649	5.82627	-7.38222	15	18	10	CDS		0	0
hsa-miR-1178-3p	NM_001258334	HAL	....(((((((((..(((...&)))..))))))))).	3408	3423	1	-18.5	1	0.00148867	0.588	0.822165	4.23064	-11.1389	12	15	9	3UTR		0	0
hsa-miR-1178-3p	NM_001258338	NDUFA12	..((((((((((((((.....&))))))))))..................)))).	374	407	0.923077	-17.1	1	0.0219214	0.691	1.97297	2.55312	-4.957	14	33	10	3UTR		0	0
hsa-miR-1178-3p	NM_001258345	PACRGL	((((((..((((.((((((..&)))))).))))..)))))).	3886	3906	0.846154	-20	1	0.00250544	0.647	0.734206	2.80284	-9.08403	16	20	6	3UTR		0	0
hsa-miR-1178-3p	NM_001258346	PACRGL	((((((..((((.((((((..&)))))).))))..)))))).	3579	3599	0.846154	-20	1	0.00250544	0.647	0.734206	2.80284	-9.08403	16	20	6	3UTR		0	0
hsa-miR-1178-3p	NM_001258353	EFTUD2	.(((((((((((((((((...&.)))))).))))))))))).	358	397	1	-28.8	1	0.000635328	0.5	0.195536	-0.189194	-3.79332	17	20	11	5UTR		0	0
hsa-miR-1178-3p	NM_001258354	EFTUD2	((.((((((((((((((((((&))))))))))))...........)).)))).)).	1578	1612	0.846154	-22.3	1	0.000223391	0.412	5.65301	5.43286	-5.49511	20	34	12	CDS		0	0
hsa-miR-1178-3p	NM_001258368	DIAPH3	((((((.(((.((((((((..&))))....))))))))))))).	3115	3137	0.846154	-16.7	1	0.0190373	0.515	4.0626	3.49809	-8.30604	17	22	13	CDS		0	0
hsa-miR-1178-3p	NM_001258375	EPS15L1	((((..((((((.(((((...&)))))...))))))..)))).	1313	1334	0.846154	-18	1	0.00116079	0.515	4.07957	4.14724	-11.2467	15	21	6	CDS		0	0
hsa-miR-1178-3p	NM_001258376	EPS15L1	.((((((((.((.((((....&)))).)).)))))))).	2743	2760	0.923077	-18.9	1	2.18285e-06	0.485	2.81758	3.42379	-6.32496	14	17	8	3UTR		0	0
hsa-miR-1178-3p	NM_001258379	SLC4A7	..((((.((((((((((((((&.))).))))))))))).)))).	4056	4085	1	-22.1	1	0.00832786	0.603	3.94329	2.41885	-6.50069	18	22	11	3UTR		0	0
hsa-miR-1178-3p	NM_001258379	SLC4A7	..((((.(((((((((((...&.))))).....)))))).)))).	2889	2931	0.923077	-18.7	1	0.00033623	0.588	1.30044	1.23488	-6.50069	15	23	6	CDS		0	0
hsa-miR-1178-3p	NM_001258380	SLC4A7	..((((.((((((((((((((&.))).))))))))))).)))).	3770	3799	1	-22.1	1	0.00832786	0.603	1.04866	1.2801	-6.50069	18	22	11	3UTR		0	0
hsa-miR-1178-3p	NM_001258380	SLC4A7	..((((.(((((((((((...&.))))).....)))))).)))).	2711	2753	0.923077	-18.7	1	0.00033623	0.588	1.46608	0.941167	-6.50069	15	23	6	CDS		0	0
hsa-miR-1178-3p	NM_001258388	ATPSCKMT	.((((((((((((((((((..&))))).))).))))))..)))).	566	589	0.923077	-21.2	1	0.0128674	0.456	-0.1341	-0.414436	-3.79332	18	23	6	CDS		0	0
hsa-miR-1178-3p	NM_001258388	ATPSCKMT	...(((((((((((((((..(&)..)))))))))..)))))).	2392	2413	1	-20.5	1	8.46221e-05	0.485	3.74599	3.42431	-6.51454	16	21	9	3UTR		0	0
hsa-miR-1178-3p	NM_001258388	ATPSCKMT	.......((.(((((((((..&))))))))).)).	19	32	0.865385	-17.3	0	2.78969e-05	0.541	0.062276	0.120868	-18.3528	11	13	9	CDS		0	0
hsa-miR-1178-3p	NM_001258390	LAYN	..(((((((((.(((((((..&.)))..))))..))))))))).	2079	2123	0.923077	-22.1	1	3.28941e-06	0.397	0.392807	0.196405	-8.3038	16	22	9	3UTR		0	0
hsa-miR-1178-3p	NM_001258390	LAYN	...(((..(((((((((((..&)))))))))))..))).	248	265	0.923077	-21.1	1	0.00369389	0.471	0.156714	0.165177	-10.3719	14	17	11	CDS		0	0
hsa-miR-1178-3p	NM_001258390	LAYN	..((((.((.((((((((((.&))))))))))..)))))).	1220	1239	0.923077	-20	1	0.00521602	0.544	3.07388	2.49271	-7.74319	16	19	10	CDS		0	0
hsa-miR-1178-3p	NM_001258391	LAYN	..(((((((((.(((((((..&.)))..))))..))))))))).	1897	1941	0.923077	-22.1	1	3.28941e-06	0.397	0.392807	0.196405	-8.3038	16	22	9	3UTR		0	0
hsa-miR-1178-3p	NM_001258391	LAYN	...(((..(((((((((((..&)))))))))))..))).	224	241	0.923077	-21.1	1	0.000302062	0.471	0.247858	0.0631269	-10.3719	14	17	11	5UTR		0	0
hsa-miR-1178-3p	NM_001258391	LAYN	..((((.((.((((((((((.&))))))))))..)))))).	1038	1057	0.923077	-20	1	0.00521602	0.544	3.07388	2.49271	-7.74319	16	19	10	CDS		0	0
hsa-miR-1178-3p	NM_001258392	CLPB	..(((((((((.(((((((..&)).)))))..))))))))).	4061	4081	0.861538	-24	1	2.38111e-05	0.397	0.614016	-0.254501	-8.3038	16	20	9	3UTR		0	0
hsa-miR-1178-3p	NM_001258392	CLPB	..(((((((((.(((((((..&)).)))))..))))))))).	6478	6498	0.846154	-23.6	1	1.07328e-06	0.412	-0.203103	-0.190745	-8.3038	16	20	9	3UTR		0	0
hsa-miR-1178-3p	NM_001258392	CLPB	..(((((((((.(((((((((&))))).....))))..))))))))).	9132	9158	0.923077	-23.4	1	0.0101681	0.5	3.95135	3.91406	-8.3038	18	26	9	3UTR		0	0
hsa-miR-1178-3p	NM_001258393	CLPB	..((((((((((((((((((.&)))))))))..........................))))))))).	7946	7991	0.846154	-26.5	1	0.000123639	0.412	2.47561	3.21194	-4.957	18	45	9	3UTR		0	0
hsa-miR-1178-3p	NM_001258393	CLPB	..(((((((((.(((((((..&)).)))))..))))))))).	3974	3994	0.923077	-24	1	2.38111e-05	0.397	0.554168	0.123978	-8.3038	16	20	9	3UTR		0	0
hsa-miR-1178-3p	NM_001258393	CLPB	..(((((((((.(((((((..&)).)))))..))))))))).	6391	6411	0.846154	-23.6	1	1.07328e-06	0.412	0.0398578	-0.152102	-8.3038	16	20	9	3UTR		0	0
hsa-miR-1178-3p	NM_001258393	CLPB	..(((((((((.(((((((((&))))).....))))..))))))))).	9045	9071	1	-23.4	1	0.0101681	0.5	2.40052	3.67985	-8.3038	18	26	9	3UTR		0	0
hsa-miR-1178-3p	NM_001258394	CLPB	..(((((((((.(((((((..&)).)))))..))))))))).	4258	4278	1	-24	1	2.38111e-05	0.397	0	0	-8.3038	16	20	9	3UTR		0	0
hsa-miR-1178-3p	NM_001258394	CLPB	..(((((((((.(((((((..&)).)))))..))))))))).	6675	6695	0.846154	-23.6	1	1.07328e-06	0.412	0	0	-8.3038	16	20	9	3UTR		0	0
hsa-miR-1178-3p	NM_001258394	CLPB	..(((((((((.(((((((((&))))).....))))..))))))))).	9329	9355	0.846154	-23.4	1	0.0101681	0.5	0	0	-8.3038	18	26	9	3UTR		0	0
hsa-miR-1178-3p	NM_001258395	CCDC103	((((((.(((((((((((.((&))))))))))))).........)))))).	745	774	0.923077	-22.9	1	0.000165386	0.324	-0.299815	0.789388	-5.48126	19	29	13	CDS		0	0
hsa-miR-1178-3p	NM_001258395	CCDC103	((.((((((((((((((....&))).....))))))))))).)).	2264	2287	1	-21	1	0.0126628	0.456	3.40072	2.34216	-5.49511	16	23	11	3UTR		0	0
hsa-miR-1178-3p	NM_001258396	CCDC103	((((((.(((((((((((.((&))))))))))))).........)))))).	759	788	0.923077	-22.9	1	0.000165386	0.324	-0.299815	0.789388	-5.48126	19	29	13	CDS		0	0
hsa-miR-1178-3p	NM_001258396	CCDC103	((.((((((((((((((....&))).....))))))))))).)).	2278	2301	1	-21	1	0.0126628	0.456	3.40072	2.34216	-5.49511	16	23	11	3UTR		0	0
hsa-miR-1178-3p	NM_001258397	CCDC103	((((((.(((((((((((.((&))))))))))))).........)))))).	822	851	0.846154	-22.9	1	0.000165386	0.324	0.349846	0.858925	-5.48126	19	29	13	3UTR		0	0
hsa-miR-1178-3p	NM_001258400	FAM187A	((.((((((((((((((....&))).....))))))))))).)).	413	436	1	-21	1	0.0126628	0.456	3.40072	2.34216	-5.49511	16	23	11	CDS		0	0
hsa-miR-1178-3p	NM_001258401	SLC4A8	((((((..((((((((((((.&))))))))))))...)))))).	438	460	0.884615	-26.1	1	0.0148958	0.5	5.34365	4.18641	-7.7949	18	22	12	CDS		0	0
hsa-miR-1178-3p	NM_001258401	SLC4A8	((.((((((((((((((((((&)))))).....)))))))))))).)).	10346	10373	0.884615	-24	1	0.0389771	0.426	-0.340443	-0.207551	-5.49511	20	27	12	3UTR		0	0
hsa-miR-1178-3p	NM_001258401	SLC4A8	((((((((...(((((((((.&)))))))))..)))))))).	5709	5729	0.846154	-23.6	1	0.206315	0.515	-0.402857	-0.293083	-9.06125	17	20	9	3UTR		0	0
hsa-miR-1178-3p	NM_001258403	SLC4A8	((((((..((((((((((((.&))))))))))))...)))))).	693	715	0.807692	-26.1	1	0.0148958	0.5	5.3234	5.56065	-7.7949	18	22	12	CDS		0	0
hsa-miR-1178-3p	NM_001258403	SLC4A8	..(((((((((...((((((.&))))))..))))))))).	1560	1578	0.923077	-22.2	1	3.88063e-06	0.426	3.48043	2.98113	-10.4498	15	18	9	CDS		0	0
hsa-miR-1178-3p	NM_001258411	SLC5A11	....((((((((((.(((((.&))).)).)))))))))).	25	43	0.846154	-18.5	1	0.000425914	0.382	0.627061	-0.181591	-10.282	15	18	10	5UTR		0	0
hsa-miR-1178-3p	NM_001258411	SLC5A11	..((((.((((((((((((..&))).)))))))).)...)))).	2058	2080	0.923077	-18.1	1	0.000675188	0.456	0.448276	0.293294	-6.50069	16	22	8	CDS		0	0
hsa-miR-1178-3p	NM_001258412	SLC5A11	....((((((((((.(((((.&))).)).)))))))))).	25	43	0.846154	-18.5	1	0.000425914	0.382	0.627061	-0.181591	-10.282	15	18	10	5UTR		0	0
hsa-miR-1178-3p	NM_001258412	SLC5A11	..((((.((((((((((((..&))).)))))))).)...)))).	1953	1975	0.923077	-18.1	1	0.000675188	0.456	0.448276	0.293294	-6.50069	16	22	8	CDS		0	0
hsa-miR-1178-3p	NM_001258413	SLC5A11	....((((((((((.(((((.&))).)).)))))))))).	25	43	0.846154	-18.5	1	0.000425914	0.382	0.417043	1.00874	-10.282	15	18	10	5UTR		0	0
hsa-miR-1178-3p	NM_001258413	SLC5A11	..((((.((((((((((((..&))).)))))))).)...)))).	2004	2026	0.923077	-18.1	1	0.000675188	0.456	0.876477	1.24353	-6.50069	16	22	8	CDS		0	0
hsa-miR-1178-3p	NM_001258414	SLC5A11	....((((((((((.(((((.&))).)).)))))))))).	25	43	0.846154	-18.5	1	0.000425914	0.382	0.627061	-0.181591	-10.282	15	18	10	5UTR		0	0
hsa-miR-1178-3p	NM_001258414	SLC5A11	..((((.((((((((((((..&))).)))))))).)...)))).	1728	1750	0.923077	-18.1	1	0.000675188	0.456	0.448276	0.293294	-6.50069	16	22	8	CDS		0	0
hsa-miR-1178-3p	NM_001258415	ARHGAP20	(((((((((.....((((((.&.))))))....))))))))).	2743	2796	0.923077	-22.2	1	6.55742e-05	0.574	3.16519	1.57966	-13.4976	15	21	9	CDS		0	0
hsa-miR-1178-3p	NM_001258416	ARHGAP20	(((((((((.....((((((.&.))))))....))))))))).	2854	2907	1	-22.2	1	6.55742e-05	0.574	0.417788	0.869026	-13.4976	15	21	9	CDS		0	0
hsa-miR-1178-3p	NM_001258417	ARHGAP20	(((((((((.....((((((.&.))))))....))))))))).	2668	2721	1	-22.2	1	6.55742e-05	0.574	0.721803	0.381334	-13.4976	15	21	9	CDS		0	0
hsa-miR-1178-3p	NM_001258418	ARHGAP20	(((((((((.....((((((.&.))))))....))))))))).	2786	2839	1	-22.2	1	6.55742e-05	0.574	3.14267	1.738	-13.4976	15	21	9	CDS		0	0
hsa-miR-1178-3p	NM_001258419	LRRC4C	..((((.((((.(((((((..&.))))))).)))..)..)))).	1726	1748	0.846154	-18.3	1	7.26851e-05	0.515	5.05626	5.31724	-9.84749	15	22	7	CDS		0	0
hsa-miR-1178-3p	NM_001258420	ZFYVE19	..((((....(((((((((..&)))))))))....)))).	1891	1909	0.846154	-20.1	1	0.000521656	0.456	0.0602721	0.152498	-11.1132	13	18	9	3UTR		0	0
hsa-miR-1178-3p	NM_001258421	ZFYVE19	..((((....(((((((((..&)))))))))....)))).	1898	1916	0.846154	-20.1	1	0.000521656	0.456	0.0602721	0.152498	-11.1132	13	18	9	3UTR		0	0
hsa-miR-1178-3p	NM_001258421	ZFYVE19	((((((.((.(((((((((((&)))).....))))))).))..)))))).	1197	1225	0.846154	-19.7	1	0.0558944	0.397	2.09094	2.1064	-6.72377	19	28	7	CDS		0	0
hsa-miR-1178-3p	NM_001258423	SMS	((((.((((((((..(((...&))).......)))))))))))).	492	515	0.923077	-18.1	1	3.54406e-05	0.529	5.23954	5.01696	-9.6489	15	23	12	CDS		0	0
hsa-miR-1178-3p	NM_001258426	SLC4A9	((((((...((((((((((((&))))))))))))....)))))).	2939	2962	1	-23.7	1	0.00160893	0.412	0.814586	0.606055	-8.85129	18	23	12	3UTR		0	0
hsa-miR-1178-3p	NM_001258426	SLC4A9	....(((((((((((((((..&)).))))).)))))))).	2806	2824	0.884615	-19	1	0.00820182	0.515	1.61373	2.43462	-9.54656	15	18	8	CDS		0	0
hsa-miR-1178-3p	NM_001258427	SLC4A9	((((((...((((((((((((&))))))))))))....)))))).	2849	2872	1	-23.7	1	0.00118103	0.412	0.814586	0.441567	-8.85129	18	23	12	3UTR		0	0
hsa-miR-1178-3p	NM_001258427	SLC4A9	....(((((((((((((((..&)).))))).)))))))).	2659	2677	0.884615	-19	1	0.00820182	0.515	1.61373	2.43462	-9.54656	15	18	8	CDS		0	0
hsa-miR-1178-3p	NM_001258428	SLC4A9	((((((...((((((((((((&))))))))))))....)))))).	3110	3133	1	-23.7	1	0.00118103	0.412	0	0	-8.85129	18	23	12	3UTR		0	0
hsa-miR-1178-3p	NM_001258428	SLC4A9	....(((((((((((((((..&)).))))).)))))))).	2920	2938	1	-19	1	0.00820182	0.515	0	0	-9.54656	15	18	8	CDS		0	0
hsa-miR-1178-3p	NM_001258429	C20orf27	..((((..(((((((.(((((&))))).))))))))))).	1034	1052	0.846154	-18.8	1	0.00313006	0.338	1.47948	1.90782	-9.04737	16	18	11	3UTR		0	0
hsa-miR-1178-3p	NM_001258430	C20orf27	..(((((((((((((((((..&)))..)))))))))))).)).	486	507	0.846154	-19.8	1	0.000138338	0.324	0.929744	0.831004	-4.957	17	21	12	5UTR		0	0
hsa-miR-1178-3p	NM_001258432	NDRG1	(((((((((((((((((((..&.))))))).))))))))...)))).	1667	1697	0.923077	-22.7	1	0.27822	0.544	0.635173	2.0307	-3.93757	19	25	8	3UTR		0	0
hsa-miR-1178-3p	NM_001258437	TARS1	(((((..(((.((((((((..&)))))))))))..))))).	166	185	0.923077	-20.4	1	0.012991	0.426	1.08691	0.927743	-10.207	16	19	11	CDS		0	0
hsa-miR-1178-3p	NM_001258437	TARS1	.(((.(.((.(((((((((..&)))))))))))).))).	24	41	0.846154	-17.6	1	0.00426542	0.471	-0.90642	-0.776208	-10.6986	15	17	12	5UTR		0	0
hsa-miR-1178-3p	NM_001258438	TARS1	(((((..(((.((((((((..&)))))))))))..))))).	151	170	1	-20.4	1	0.012991	0.426	-1.20082	0.565757	-10.207	16	19	11	CDS		0	0
hsa-miR-1178-3p	NM_001258438	TARS1	.....(.((((((((((....&)))))))))).).	2426	2439	0.923077	-15.9	0	0.000883796	0.588	4.42759	5.0236	-15.2093	11	13	10	3UTR		0	0
hsa-miR-1178-3p	NM_001258440	BLNK	(((((..((((((((((((((&)))))))))............)))))..))))).	2153	2187	0.846154	-19.1	1	0.0123445	0.515	0	0	-7.38222	19	34	9	3UTR		0	0
hsa-miR-1178-3p	NM_001258440	BLNK	((((((((((((((((.....&)))))))))))................))))).	351	384	0.846154	-18.1	1	0.0236211	0.485	3.32102	3.59345	-3.93757	16	33	11	CDS		0	0
hsa-miR-1178-3p	NM_001258442	BLNK	(((((..((((((((((((((&)))))))))............)))))..))))).	1838	1872	0.846154	-19.1	1	0.0123445	0.515	0	0	-7.38222	19	34	9	3UTR		0	0
hsa-miR-1178-3p	NM_001258442	BLNK	((((((((((((((((.....&)))))))))))................))))).	351	384	0.846154	-18.1	1	0.0236211	0.485	3.32102	3.59345	-3.93757	16	33	11	CDS		0	0
hsa-miR-1178-3p	NM_001258446	TOP1MT	((((((((((((((((.....&.))))))))))))).))).	1096	1126	1	-20.6	1	0.00164605	0.353	3.6058	2.7705	-3.93757	16	19	13	CDS		0	0
hsa-miR-1178-3p	NM_001258447	TOP1MT	((((((((((((((((.....&.))))))))))))).))).	955	985	1	-20.6	1	0.00164605	0.353	4.28545	2.98083	-3.93757	16	19	13	CDS		0	0
hsa-miR-1178-3p	NM_001258450	PKMYT1	((((((((((((((((((.((&)))))))))))..................))))...))))).	203	245	0.846154	-18.7	1	0.00697072	0.368	0.932606	1.32001	-3.93757	20	42	11	5UTR		0	0
hsa-miR-1178-3p	NM_001258451	PKMYT1	((((((((((((((((((.((&)))))))))))..................))))...))))).	227	269	0.846154	-18.7	1	0.00172528	0.368	0.490072	1.26888	-3.93757	20	42	11	5UTR		0	0
hsa-miR-1178-3p	NM_001258456	TNIP1	((((((.((((((..((((((&)))).))..)))))))))))).	1089	1111	0.923077	-22.1	1	0.000569967	0.382	2.8227	2.55332	-7.07355	18	22	12	CDS		0	0
hsa-miR-1178-3p	NM_001258457	TBC1D7	.((((((((((.....(((..&)))....)))))))))).	863	881	0.846154	-18.8	1	3.7551e-05	0.456	6.32542	2.85094	-10.2546	13	18	10	3UTR		0	0
hsa-miR-1178-3p	NM_001259	CDK6	.((((((.((((((((((((.&)))))))))))).)).)))).	7324	7345	1	-21.5	1	1.79086e-05	0.603	0.276992	0.0830172	-6.10696	18	21	12	3UTR		0	0
hsa-miR-1178-3p	NM_001259	CDK6	((((((((((((((((.((..&)).)))))))))))..................))))).	9398	9436	0.923077	-19.3	1	3.59253e-05	0.5	1.17307	0.89985	-3.93757	18	38	11	3UTR		0	0
hsa-miR-1178-3p	NM_001260	CDK8	(((((((((.(((((((.((.&)).)))))))..))))))))).	45	67	0.923077	-19.6	1	0.192749	0.471	1.14947	0.930471	-5.18008	18	22	9	5UTR		0	1
hsa-miR-1178-3p	NM_001260	CDK8	(((((((....(((((((((.&)))).)))))...))))))).	991	1012	0.923077	-18.5	1	0.000559492	0.588	7.94923	6.4853	-11.3749	16	21	7	CDS		0	1
hsa-miR-1178-3p	NM_001260476	WDR4	(((((((((((((((((((..&)))))))...))).)))).))))).	1333	1358	0.923077	-18.4	1	7.41745e-05	0.5	0.796694	1.41597	-3.93757	19	25	7	3UTR		0	0
hsa-miR-1178-3p	NM_001260486	ZNF155	..(((...((.((((((((((&))))))))))))....))).	2090	2110	0.846154	-18.6	1	0.0661287	0.529	-0.115559	-0.214292	-13.5401	15	20	12	3UTR		0	0
hsa-miR-1178-3p	NM_001260486	ZNF155	..(((((((((((...((((.&))))...))..))))))))).	2313	2334	0.923077	-18.7	1	0.00028916	0.588	0.506243	0.105013	-6.78234	15	21	9	3UTR		0	0
hsa-miR-1178-3p	NM_001260488	ZNF155	..(((...((.((((((((((&))))))))))))....))).	2076	2096	0.846154	-18.6	1	0.0661287	0.529	-0.115559	-0.214292	-13.5401	15	20	12	3UTR		0	0
hsa-miR-1178-3p	NM_001260488	ZNF155	..(((((((((((...((((.&))))...))..))))))))).	2299	2320	0.923077	-18.7	1	0.00028916	0.588	0.506243	0.105013	-6.78234	15	21	9	3UTR		0	0
hsa-miR-1178-3p	NM_001260491	SLC9A8	..(((((((((...(((((((&.))))))).))))))))).	3292	3339	0.923077	-25	1	1.22591e-05	0.397	-0.454436	-0.4711	-10.4498	16	19	9	3UTR		0	0
hsa-miR-1178-3p	NM_001260491	SLC9A8	...(((((((((((((((((.&))).))))))))).))))).	3986	4006	1	-22.7	1	6.80112e-05	0.426	-0.0134771	0.0132463	-6.51454	17	20	9	3UTR		0	0
hsa-miR-1178-3p	NM_001260492	RDX	.((((((((((((((((((((&))))))))))............)))))......))))).	1137	1176	0.923077	-22.7	1	0.0208142	0.603	4.39584	4.71998	-3.79332	20	39	10	CDS	MIRT619680	0	0
hsa-miR-1178-3p	NM_001260492	RDX	((((((.(((((((((.....&)))))).))))))))).	1444	1461	0.923077	-18.1	1	0.000106726	0.5	4.99309	4.64361	-5.48126	15	17	9	CDS	MIRT619680	0	0
hsa-miR-1178-3p	NM_001260492	RDX	...((((((((((((......&.)))))))))))).	698	718	0.846154	-18	1	0.0926301	0.632	4.76374	4.10244	-6.74759	12	14	12	CDS	MIRT619680	0	0
hsa-miR-1178-3p	NM_001260493	RDX	.((((((((((((((((((((&))))))))))............)))))......))))).	1137	1176	1	-22.7	1	0.0208142	0.603	4.16071	4.57727	-3.79332	20	39	10	CDS	MIRT619680	0	0
hsa-miR-1178-3p	NM_001260493	RDX	((((((.(((((((((.....&)))))).))))))))).	1444	1461	0.923077	-18.1	1	0.000106726	0.5	6.3847	6.16362	-5.48126	15	17	9	CDS	MIRT619680	0	0
hsa-miR-1178-3p	NM_001260494	RDX	.((((((((((((((((((((&))))))))))............)))))......))))).	766	805	1	-22.7	1	0.0208142	0.603	2.7884	2.67564	-3.79332	20	39	10	CDS	MIRT619680	0	0
hsa-miR-1178-3p	NM_001260494	RDX	((((((.(((((((((.....&)))))).))))))))).	1073	1090	0.846154	-18.1	1	0.000106726	0.5	1.29842	0.732139	-5.48126	15	17	9	CDS	MIRT619680	0	0
hsa-miR-1178-3p	NM_001260494	RDX	...((((((((((((......&.)))))))))))).	327	347	0.923077	-18	1	0.0696697	0.632	2.29081	2.2443	-6.74759	12	14	12	CDS	MIRT619680	0	0
hsa-miR-1178-3p	NM_001260497	KCNC2	((((((.((((((((((((((&))))))))))..........)))).........)))))).	176	216	0.846154	-19.2	1	0.000874761	0.471	2.1096	1.9103	-5.48126	20	40	10	5UTR		0	0
hsa-miR-1178-3p	NM_001260498	KCNC2	((((((.((((((((((((((&))))))))))..........)))).........)))))).	176	216	0.846154	-19.2	1	0.000874761	0.471	2.1096	1.9103	-5.48126	20	40	10	5UTR		0	0
hsa-miR-1178-3p	NM_001260499	KCNC2	((((((.((((((((((((((&))))))))))..........)))).........)))))).	176	216	0.846154	-19.2	1	0.000874761	0.471	2.1096	1.9103	-5.48126	20	40	10	5UTR		0	0
hsa-miR-1178-3p	NM_001260502	SRP68	(((((.(((((((((((((..&)).)))))))))))...))))).	806	829	0.923077	-19.3	1	0.00041051	0.544	0.571031	0.819984	-5.83853	18	23	11	CDS		0	0
hsa-miR-1178-3p	NM_001260502	SRP68	..(((....(((((((((...&)))))))))...))).	966	982	0.923077	-17.8	1	0.00204537	0.471	5.09493	4.66104	-11.7717	12	16	9	CDS		0	0
hsa-miR-1178-3p	NM_001260503	SRP68	((.((((((((((((......&.)))))))))))).)).	58	80	0.865385	-18.4	1	0.000109315	0.485	-0.0930865	0.089812	-5.72816	14	17	12	5UTR		0	0
hsa-miR-1178-3p	NM_001260506	RPS3	..(((..(((((((((.((((&)))).)))))))))...))).	1561	1582	0.923077	-19.7	1	0.000180944	0.618	0.0479157	-0.077641	-8.40165	16	21	9	3UTR		0	0
hsa-miR-1178-3p	NM_001260507	RPS3	..(((..(((((((((.((((&)))).)))))))))...))).	1351	1372	0.923077	-19.7	1	0.000180944	0.618	-0.0696859	-0.161692	-8.40165	16	21	9	3UTR		0	0
hsa-miR-1178-3p	NM_001260508	KCNJ3	..(((((((((.(((((((..&.)).)))))..))))))))).	3839	3886	1	-23.9	1	0.000101183	0.412	-0.436843	-0.236277	-8.3038	16	21	9	3UTR		0	0
hsa-miR-1178-3p	NM_001261	CDK9	((((((.(((((((((((...&.))))...))))))))))))).	27	72	0.846154	-23.2	1	4.43138e-07	0.162	0.486003	1.32856	-5.48126	17	22	13	5UTR		0	0
hsa-miR-1178-3p	NM_001261382	UEVLD	(((((((((((.((((((((.&.)))).))))...))))))))))).	2908	2957	0.923077	-26.2	1	2.45869e-05	0.353	2.72397	3.40166	-7.28438	19	25	11	3UTR	MIRT671542	0	0
hsa-miR-1178-3p	NM_001261383	UEVLD	(((((((((((.((((((((.&.)))).))))...))))))))))).	2784	2833	0.923077	-26.2	1	2.45869e-05	0.353	1.15633	2.25521	-7.28438	19	25	11	3UTR	MIRT671542	0	0
hsa-miR-1178-3p	NM_001261385	UEVLD	(((((((((((.((((((((.&.)))).))))...))))))))))).	2819	2868	0.923077	-26.2	1	2.45869e-05	0.353	2.77738	1.85594	-7.28438	19	25	11	3UTR	MIRT671542	0	0
hsa-miR-1178-3p	NM_001261386	UEVLD	(((((((((((.((((((((.&.)))).))))...))))))))))).	2315	2364	0.846154	-26.2	1	2.45869e-05	0.353	0.0915261	0.272106	-7.28438	19	25	11	3UTR	MIRT671542	0	0
hsa-miR-1178-3p	NM_001261390	CALCOCO2	.(((((((((((((((((...&.)).)))))))))))).))).	3427	3448	1	-24.5	1	0.0117587	0.647	0.588084	0.622436	-3.79332	17	21	12	3UTR		0	0
hsa-miR-1178-3p	NM_001261390	CALCOCO2	(((((((((((((((((((..&)))))..............))))))))..)))))).	871	907	0.846154	-22.2	1	0.00432811	0.574	1.05089	1.51595	-3.93757	19	36	8	CDS		0	0
hsa-miR-1178-3p	NM_001261390	CALCOCO2	....(((((.((((((((((.&))))))))))))))).	2467	2483	0.923077	-20	1	0.000295947	0.515	0.153619	-0.0866629	-10.7891	15	16	15	3UTR		0	0
hsa-miR-1178-3p	NM_001261391	CALCOCO2	.(((((((((((((((((...&.)).)))))))))))).))).	3418	3439	1	-24.5	1	0.0117587	0.647	0.588084	0.622436	-3.79332	17	21	12	3UTR		0	0
hsa-miR-1178-3p	NM_001261391	CALCOCO2	(((((((((((((((((((..&)))))..............))))))))..)))))).	862	898	0.846154	-22.2	1	0.00432811	0.574	1.05089	1.51595	-3.93757	19	36	8	CDS		0	0
hsa-miR-1178-3p	NM_001261391	CALCOCO2	....(((((.((((((((((.&))))))))))))))).	2458	2474	0.923077	-20	1	0.000295947	0.515	0.153619	-0.0866629	-10.7891	15	16	15	3UTR		0	0
hsa-miR-1178-3p	NM_001261392	NOL10	.((((((((((((.((((...&))))...))))))))......)))).	87	113	0.846154	-19.3	1	0.000273181	0.412	-0.0245133	0.100584	-4.65016	16	26	8	5UTR		0	0
hsa-miR-1178-3p	NM_001261393	CALCOCO2	.(((((((((((((((((...&.)).)))))))))))).))).	3229	3250	1	-24.5	1	0.0117587	0.647	0.588084	0.622436	-3.79332	17	21	12	3UTR		0	0
hsa-miR-1178-3p	NM_001261393	CALCOCO2	(((((((((((((((((((..&)))))..............))))))))..)))))).	673	709	0.846154	-22.2	1	0.00432811	0.574	1.05089	1.51595	-3.93757	19	36	8	CDS		0	0
hsa-miR-1178-3p	NM_001261393	CALCOCO2	....(((((.((((((((((.&))))))))))))))).	2269	2285	0.923077	-20	1	0.000295947	0.515	0.153619	-0.0866629	-10.7891	15	16	15	3UTR		0	0
hsa-miR-1178-3p	NM_001261394	NOL10	.((((((((((((.((((...&))))...))))))))......)))).	87	113	0.846154	-19.3	1	0.000273181	0.412	-0.0245133	0.100584	-4.65016	16	26	8	5UTR		0	0
hsa-miR-1178-3p	NM_001261395	CALCOCO2	.(((((((((((((((((...&.)).)))))))))))).))).	3165	3186	1	-24.5	1	0.0117587	0.647	0.588084	0.622436	-3.79332	17	21	12	3UTR		0	0
hsa-miR-1178-3p	NM_001261395	CALCOCO2	(((((((((((((((((((..&)))))..............))))))))..)))))).	609	645	0.846154	-22.2	1	0.00432811	0.574	1.05089	1.51595	-3.93757	19	36	8	CDS		0	0
hsa-miR-1178-3p	NM_001261395	CALCOCO2	....(((((.((((((((((.&))))))))))))))).	2205	2221	0.923077	-20	1	0.000295947	0.515	0.153619	-0.0866629	-10.7891	15	16	15	3UTR		0	0
hsa-miR-1178-3p	NM_001261400	PSMD9	((((((((((((...((((((&))))))...)))))))..))))).	2028	2052	0.846154	-20.9	1	6.01916e-07	0.544	-0.46172	-0.167239	-6.81899	18	24	7	3UTR		0	0
hsa-miR-1178-3p	NM_001261403	NFKB2	...((((((..((((((((((&)))).)))))))))))).	2772	2790	0.923077	-19.3	1	0.00715585	0.382	3.16846	2.82012	-10.5818	16	18	12	CDS		0	0
hsa-miR-1178-3p	NM_001261403	NFKB2	..((((....(((((((((..&)))))))))......)))).	1503	1523	0.846154	-19.3	1	4.93427e-06	0.235	0.364308	0.814523	-11.1132	13	20	9	CDS		0	0
hsa-miR-1178-3p	NM_001261406	MPDZ	(((((((((((((((((((((&.))))..)))).))))))))))))).	1263	1302	1	-28.8	1	0.0137845	0.544	4.46075	2.29507	-3.93757	21	26	13	CDS		0	0
hsa-miR-1178-3p	NM_001261408	BCAR3	..(((((((((((((((....&))))))))).....)))))).	2078	2099	1	-21.6	1	0.00205373	0.456	1.46494	2.39307	-4.957	15	21	9	CDS		0	0
hsa-miR-1178-3p	NM_001261409	BCAR3	..(((((((((((((((....&))))))))).....)))))).	1995	2016	1	-21.6	1	0.00205373	0.456	3.42237	2.68372	-4.957	15	21	9	CDS		0	0
hsa-miR-1178-3p	NM_001261410	BCAR3	((((((((.((((((((((((&)))).)))))))).)....))))))).	305	332	0.846154	-22.7	1	1.38129e-07	0.368	3.93306	2.09068	-4.99396	20	27	8	CDS		0	0
hsa-miR-1178-3p	NM_001261410	BCAR3	..(((((((((((((((....&))))))))).....)))))).	1614	1635	1	-21.6	1	0.00205373	0.456	1.31644	0.960607	-4.957	15	21	9	CDS		0	0
hsa-miR-1178-3p	NM_001261411	SFSWAP	..((.((((.(((((((((..&)))))))))...)))).)).	2753	2773	0.923077	-20.2	1	0.000566414	0.324	3.15397	2.57758	-10.3185	15	20	9	CDS		0	0
hsa-miR-1178-3p	NM_001261412	DCTN2	..((((((.((((((((((((&)))))))...))))))))))).	1560	1582	0.846154	-22.8	1	1.94245e-05	0.397	2.88495	3.90051	-6.01339	18	22	11	3UTR		0	0
hsa-miR-1178-3p	NM_001261412	DCTN2	.......((((((((((((((&))))))))))).))).	1739	1755	0.846154	-19.8	0	6.72096e-05	0.529	5.62905	4.97197	-17.1102	14	16	11	3UTR		0	0
hsa-miR-1178-3p	NM_001261412	DCTN2	..(((((..(((((((((((.&)))))))))))))))).	1624	1641	0.846154	-19.9	1	1.72355e-06	0.456	3.40218	4.46237	-8.32703	16	17	16	3UTR		0	0
hsa-miR-1178-3p	NM_001261412	DCTN2	..((((.((((((((((((((&)))))....))))))))))))).	1347	1370	0.833333	-19	1	0.0006772	0.485	3.36902	4.13351	-6.50069	18	23	13	3UTR		0	0
hsa-miR-1178-3p	NM_001261413	DCTN2	..((((((.((((((((((((&)))))))...))))))))))).	1554	1576	0.923077	-22.8	1	1.94245e-05	0.397	3.42115	3.99293	-6.01339	18	22	11	3UTR		0	0
hsa-miR-1178-3p	NM_001261413	DCTN2	.......((((((((((((((&))))))))))).))).	1733	1749	0.846154	-19.8	0	6.72096e-05	0.529	5.52787	4.95951	-17.1102	14	16	11	3UTR		0	0
hsa-miR-1178-3p	NM_001261413	DCTN2	..(((((..(((((((((((.&)))))))))))))))).	1618	1635	0.846154	-19.9	1	1.72355e-06	0.456	2.7491	4.35856	-8.32703	16	17	16	3UTR		0	0
hsa-miR-1178-3p	NM_001261413	DCTN2	..((((.((((((((((((((&)))))....))))))))))))).	1341	1364	0.833333	-19	1	0.0006772	0.485	3.93998	4.07441	-6.50069	18	23	13	3UTR		0	0
hsa-miR-1178-3p	NM_001261414	SOX5	(((((((((.(((((((((..&)))..))))))))))))))).	786	807	0.846154	-20.3	1	3.04972e-05	0.441	0.869738	1.22401	-5.18008	18	21	15	CDS		0	1
hsa-miR-1178-3p	NM_001261414	SOX5	((((((.((.(((((((((..&)).))))))).))..)))))).	565	587	0.846154	-19.7	1	0.069633	0.456	2.0468	1.57763	-6.72377	17	22	7	CDS		0	1
hsa-miR-1178-3p	NM_001261414	SOX5	((((((((((((.((((((((&))).))))).))))))))..........)))).	2374	2407	1	-18.7	1	0.0105152	0.603	0.779993	0.76757	-5.22671	20	33	8	CDS		0	1
hsa-miR-1178-3p	NM_001261415	SOX5	((((((((((((.((((((((&))).))))).))))))))..........)))).	2267	2300	1	-18.7	1	0.0105152	0.603	1.98059	2.42207	-5.22671	20	33	8	CDS		0	1
hsa-miR-1178-3p	NM_001261420	OS9	...(((.(((((((((((((.&))))))))).))))))).	1832	1850	0.942308	-20.8	1	0.00172999	0.368	1.54043	2.28566	-8.05823	16	18	9	CDS		0	0
hsa-miR-1178-3p	NM_001261420	OS9	...((((((((((((((....&))))))))..)))))).	128	145	0.923077	-19.5	1	0.00394939	0.397	-0.0787393	0.933802	-6.51454	14	17	8	CDS		0	0
hsa-miR-1178-3p	NM_001261421	OS9	...(((.(((((((((((((.&))))))))).))))))).	1733	1751	0.942308	-20.8	1	0.00172999	0.368	1.54043	2.28566	-8.05823	16	18	9	CDS		0	0
hsa-miR-1178-3p	NM_001261421	OS9	...((((((((((((((....&))))))))..)))))).	128	145	0.923077	-19.5	1	0.00394939	0.397	-0.0787393	0.933802	-6.51454	14	17	8	CDS		0	0
hsa-miR-1178-3p	NM_001261422	OS9	...(((.(((((((((((((.&))))))))).))))))).	1673	1691	0.942308	-20.8	1	0.00172999	0.368	1.54043	2.28566	-8.05823	16	18	9	CDS		0	0
hsa-miR-1178-3p	NM_001261422	OS9	...((((((((((((((....&))))))))..)))))).	128	145	0.923077	-19.5	1	0.00394939	0.397	-0.0787393	0.933802	-6.51454	14	17	8	CDS		0	0
hsa-miR-1178-3p	NM_001261423	OS9	...(((.(((((((((((((.&))))))))).))))))).	1607	1625	0.942308	-20.8	1	0.00172999	0.368	1.54043	2.28566	-8.05823	16	18	9	CDS		0	0
hsa-miR-1178-3p	NM_001261423	OS9	...((((((((((((((....&))))))))..)))))).	128	145	0.923077	-19.5	1	0.00363097	0.397	-0.0787393	0.933802	-6.51454	14	17	8	CDS		0	0
hsa-miR-1178-3p	NM_001261424	PPP1R1C	..(((..((((((((((((((&)))).))))))))))...))).	39	61	0.846154	-19.9	1	0.00524268	0.426	1.01755	2.15165	-8.40165	17	22	10	5UTR		0	0
hsa-miR-1178-3p	NM_001261424	PPP1R1C	...(((.(((((((((.((..&)).))))))))).))).	585	602	1	-18	1	0.0011848	0.559	2.12546	2.20369	-8.05823	14	17	9	CDS		0	0
hsa-miR-1178-3p	NM_001261425	PPP1R1C	..(((..((((((((((((((&)))).))))))))))...))).	39	61	0.846154	-19.9	1	0.00524268	0.426	1.01755	2.15165	-8.40165	17	22	10	5UTR		0	0
hsa-miR-1178-3p	NM_001261425	PPP1R1C	...(((.(((((((((.((..&)).))))))))).))).	564	581	1	-18	1	0.0011848	0.559	2.12546	2.20369	-8.05823	14	17	9	CDS		0	0
hsa-miR-1178-3p	NM_001261427	LPIN1	((.(((.((((((((((((..&))))))).)))))))).)).	83	103	0.923077	-23.1	1	0.472997	0.353	0.472702	0.345427	-7.0388	17	20	8	5UTR		0	0
hsa-miR-1178-3p	NM_001261427	LPIN1	..((((((.(((((((((...&))))))))).))))..)).	3463	3482	0.826923	-20.7	1	5.26399e-05	0.456	-0.678924	-0.561829	-6.01339	15	19	9	3UTR		0	0
hsa-miR-1178-3p	NM_001261427	LPIN1	(((((..((((((((((((..&)))))...)))))))..))))).	49	72	0.820513	-19.5	1	0.0126044	0.382	0.714592	0.0137685	-7.38222	17	23	7	5UTR		0	0
hsa-miR-1178-3p	NM_001261428	LPIN1	..((((((.(((((((((...&))))))))).))))..)).	3508	3527	0.826923	-20.7	1	5.26399e-05	0.456	-0.678924	-0.561829	-6.01339	15	19	9	3UTR		0	0
hsa-miR-1178-3p	NM_001261428	LPIN1	.((((..((((((((((....&))))))))))...)))).	106	124	0.923077	-19.6	1	0.00456062	0.324	1.58318	-0.12746	-7.23797	14	18	10	CDS		0	0
hsa-miR-1178-3p	NM_001261428	LPIN1	..(((((((((.((((.....&))))..))))))))).	4687	4703	0.846154	-19.3	1	0.000113639	0.5	-0.234927	-0.292583	-8.3038	13	16	9	3UTR		0	0
hsa-miR-1178-3p	NM_001261430	PTGES3L	..(((((((((((((((((..&)))))))....))).))).)))).	707	731	0.923077	-17.7	1	0.00220101	0.515	0.416153	0.0987905	-4.957	17	24	7	3UTR		0	0
hsa-miR-1178-3p	NM_001261434	AARSD1	..((((((((((((.((.(((&.))).)).))))))).))))).	536	567	0.846154	-20.3	1	4.11787e-05	0.412	3.05385	3.88413	-5.69245	17	22	7	CDS		0	0
hsa-miR-1178-3p	NM_001261435	CDK15	((.(((((((.((((.((((.&.)))).))))))))))).)).	2	47	1	-20.4	1	0.256941	0.5	0.204644	1.91566	-8.55294	17	21	11	5UTR		0	0
hsa-miR-1178-3p	NM_001261435	CDK15	((.(((..(((((((((..((&))..)))))))))..))).)).	2377	2399	0.923077	-19	1	0.0135597	0.676	0.84476	0.876789	-9.35244	16	22	9	3UTR		0	0
hsa-miR-1178-3p	NM_001261436	CDK15	(((((.(((.((((((((...&.)))))))).)))..))))).	1445	1474	0.923077	-21.5	1	0.000304465	0.603	1.23627	0.921545	-7.08104	16	21	8	3UTR		0	0
hsa-miR-1178-3p	NM_001261436	CDK15	((.(((((((.((((.((((.&.)))).))))))))))).)).	11	47	1	-20.4	1	0.256941	0.5	-0.254074	1.43419	-8.55294	17	21	11	5UTR		0	0
hsa-miR-1178-3p	NM_001261437	ETV4	(((((((((.((((((((...&))))))))..)))).......))))).	1720	1747	0.923077	-19.4	1	0.0582464	0.485	3.60834	2.98742	-5.18008	17	27	8	3UTR		0	0
hsa-miR-1178-3p	NM_001261437	ETV4	.((((((.((((((.((((..&)))).)))).)).)))))).	826	846	0.923077	-18.5	1	1.86557e-05	0.309	6.77931	4.93565	-6.84241	16	20	6	CDS		0	0
hsa-miR-1178-3p	NM_001261438	ETV4	(((((((((.((((((((...&))))))))..)))).......))))).	1603	1630	1	-19.4	1	0.0582464	0.485	1.82837	2.18298	-5.18008	17	27	8	3UTR		0	0
hsa-miR-1178-3p	NM_001261438	ETV4	.((((((.((((((.((((..&)))).)))).)).)))))).	709	729	0.846154	-18.5	1	1.86557e-05	0.309	3.21429	3.7078	-6.84241	16	20	6	CDS		0	0
hsa-miR-1178-3p	NM_001261443	GNAL	..(((((((((((((((((..&.))).)))))..))))))))).	2751	2784	1	-24.6	1	0.000155719	0.412	0.183214	-0.0588097	-4.957	17	22	9	3UTR		0	0
hsa-miR-1178-3p	NM_001261443	GNAL	(((((((((((.(((((((((&))))))))............).))).)))))))).	4276	4311	0.846154	-19.4	1	0.000177497	0.544	1.49347	0.846063	-7.28438	20	35	8	3UTR		0	0
hsa-miR-1178-3p	NM_001261444	GNAL	..(((((((((((((((((..&.))).)))))..))))))))).	2154	2187	1	-24.6	1	0.000155719	0.412	0.183214	-0.0588097	-4.957	17	22	9	3UTR		0	0
hsa-miR-1178-3p	NM_001261444	GNAL	(((((((((((.(((((((((&))))))))............).))).)))))))).	3679	3714	0.846154	-19.4	1	0.000177497	0.544	1.49347	0.846063	-7.28438	20	35	8	3UTR		0	0
hsa-miR-1178-3p	NM_001261445	TXNRD1	((((((.((.((.((((((..&)))))).)).)).)))))).	3574	3594	0.846154	-19.7	1	0.113411	0.632	0.26211	-0.181877	-8.0129	16	20	6	3UTR		0	0
hsa-miR-1178-3p	NM_001261446	TXNRD1	((((((.((.((.((((((..&)))))).)).)).)))))).	3129	3149	0.846154	-19.7	1	0.113411	0.632	0.26211	-0.181877	-8.0129	16	20	6	3UTR		0	0
hsa-miR-1178-3p	NM_001261450	UCK1	..(((((.(.(((((((((..&))))))))).).))))).	2027	2045	1	-21.8	1	0.000108747	0.397	0.285123	0.7097	-8.51314	15	18	9	3UTR		0	0
hsa-miR-1178-3p	NM_001261451	UCK1	..(((((.(.(((((((((..&))))))))).).))))).	2069	2087	1	-21.8	1	0.000108747	0.397	0.285123	0.7097	-8.51314	15	18	9	3UTR		0	0
hsa-miR-1178-3p	NM_001261456	LY9	((.(((..(((((((((((..&)).)))))))))..))).)).	758	779	0.807692	-18.1	1	0.0325926	0.382	0.507209	0.307173	-9.35244	16	21	9	CDS		0	0
hsa-miR-1178-3p	NM_001261457	LY9	((.(((..(((((((((((..&)).)))))))))..))).)).	758	779	0.807692	-18.1	1	0.0325926	0.382	0.507209	0.307173	-9.35244	16	21	9	CDS		0	0
hsa-miR-1178-3p	NM_001261458	ZNF484	((((((((((((((((((((.&.)))).))))))))).))))))).	124	158	1	-25.3	1	0.0155333	0.397	0.499893	0.320689	-3.93757	20	24	9	5UTR		0	0
hsa-miR-1178-3p	NM_001261459	ZNF484	((((((((((((((((((((.&.)))).))))))))).))))))).	124	158	1	-25.3	1	0.0154424	0.397	0.499893	0.320689	-3.93757	20	24	9	5UTR		0	0
hsa-miR-1178-3p	NM_001261461	NFE2	..((((.(((.((((((((..&))))))))))).)))).	1057	1074	0.846154	-20.6	1	0.00094053	0.324	1.34308	1.26556	-9.32546	15	17	11	CDS		0	0
hsa-miR-1178-3p	NM_001261463	NRAP	...((((((((((((((((..&)))))))))..................))))))).	3728	3763	1	-21.5	1	0.000990212	0.529	3.21186	3.49822	-6.51454	16	35	9	CDS		0	0
hsa-miR-1178-3p	NM_001261464	ADAM15	..((((...((((((((((((&))))))))))))...)))).	2727	2747	0.923077	-20.8	1	0.00135434	0.309	0.0673434	-0.115306	-9.87071	16	20	12	3UTR		0	0
hsa-miR-1178-3p	NM_001261465	ADAM15	..((((...((((((((((((&))))))))))))...)))).	2699	2719	0.923077	-20.8	1	0.00135434	0.309	0.0673434	-0.115306	-9.87071	16	20	12	3UTR		0	0
hsa-miR-1178-3p	NM_001261465	ADAM15	.((((((((((.....(((((&)))))...)))))))))).	999	1018	0.884615	-20.2	1	3.97594e-06	0.456	2.46711	2.55651	-10.2546	15	19	10	CDS		0	0
hsa-miR-1178-3p	NM_001261466	ADAM15	.((((((((((.....(((((&)))))...)))))))))).	951	970	0.884615	-20.2	1	3.97594e-06	0.456	2.46711	2.55651	-10.2546	15	19	10	CDS		0	0
hsa-miR-1178-3p	NM_001261467	NSRP1	(((((((((((((((((((..&.))))..))))...................))))))))))).	1448	1500	1	-22.8	1	0.0027996	0.544	1.32532	2.56374	-3.93757	19	42	11	CDS		0	0
hsa-miR-1178-3p	NM_001261467	NSRP1	(((((..(((.((((((((..&)))))))).)))....))))).	879	901	1	-20.6	1	0.0121817	0.515	1.04787	0.665517	-10.207	16	22	8	CDS		0	0
hsa-miR-1178-3p	NM_001261816	PDPK1	((((((((((((((.......&)))))))))))))).	4269	4284	0.923077	-19.7	1	2.9867e-07	0.338	-0.4434	-0.337419	-4.90607	14	15	14	3UTR		0	1
hsa-miR-1178-3p	NM_001261817	TCP11	..((((((((((.........&.)))))))))).	1703	1739	0.846154	-17.2	1	0.0172576	0.426	-0.718934	-0.0147381	-8.07147	10	12	10	3UTR		0	0
hsa-miR-1178-3p	NM_001261818	TCP11	..((((((((((.........&.)))))))))).	1580	1616	0.923077	-17.2	1	0.0172576	0.426	0.191076	0.0111267	-8.07147	10	12	10	3UTR		0	0
hsa-miR-1178-3p	NM_001261819	TCP11	..((((((((((.........&.)))))))))).	1565	1601	0.923077	-17.2	1	0.0172576	0.426	-0.274705	0.0606592	-8.07147	10	12	10	3UTR		0	0
hsa-miR-1178-3p	NM_001261820	TCP11	..((((((((((.........&.)))))))))).	1924	1960	0.923077	-17.2	1	0.0172576	0.426	-0.0636928	-0.118296	-8.07147	10	12	10	3UTR		0	0
hsa-miR-1178-3p	NM_001261825	OASL	..(((((.((((((((((...&))))))))))..))))).	1605	1623	1	-22.8	1	0.000339574	0.397	-0.155894	-0.340261	-7.27064	15	18	10	3UTR		0	0
hsa-miR-1178-3p	NM_001261826	AP3D1	(((((((((((.((((((...&)))))).)))))))..............)))).	3808	3841	0.846154	-22.4	1	0.000296576	0.441	5.50632	5.54912	-7.28438	17	33	7	CDS		0	0
hsa-miR-1178-3p	NM_001261826	AP3D1	((((((.(((((((((.....&))))))))))))))).	3276	3292	0.923077	-21.4	1	0.000132208	0.397	7.2385	4.41461	-5.48126	15	16	15	CDS		0	0
hsa-miR-1178-3p	NM_001261827	MS4A14	.(((((((((((((((.....&.)))))))).).)))))).	2791	2843	0.846154	-17.7	1	0.0010974	0.706	-0.185395	0.262317	-3.79332	15	19	8	3UTR		0	0
hsa-miR-1178-3p	NM_001261828	MS4A14	.(((((((((((((((.....&.)))))))).).)))))).	2842	2894	1	-17.7	1	0.0010974	0.706	0.197969	0.244905	-3.79332	15	19	8	3UTR		0	0
hsa-miR-1178-3p	NM_001261832	ASH2L	..((.((((((((((((((..&))))))).................))))))))).	345	379	0.820513	-18.9	1	0.00022203	0.529	2.20998	1.89564	-9.07604	16	34	9	5UTR		0	0
hsa-miR-1178-3p	NM_001261833	JRKL	....((((((((((((((...&))))).))))))))).	566	582	0.846154	-18.3	1	0.010257	0.529	1.95642	1.95059	-9.54656	14	16	9	CDS		0	0
hsa-miR-1178-3p	NM_001261839	TTPAL	..(((((((((.((((((((.&))).)))))..))))))))).	4730	4751	0.923077	-24.7	1	6.6908e-06	0.397	-0.034203	0.0240802	-8.3038	17	21	9	3UTR		0	0
hsa-miR-1178-3p	NM_001261839	TTPAL	..(((((((((.(.(((((..&)))))).))))))))).	3756	3773	0.846154	-23.7	1	0.000238407	0.368	-1.09999	-0.793658	-9.16064	15	17	9	3UTR		0	0
hsa-miR-1178-3p	NM_001261839	TTPAL	..(((((((((((((((((..&)))..)))).)))))))))).	2522	2543	0.846154	-22	1	7.01144e-05	0.397	-0.355337	-0.254611	-4.957	17	21	10	3UTR		0	0
hsa-miR-1178-3p	NM_001261841	TMC5	.((((((((((...(((((((&.))))))).))))))).))).	1994	2029	0.923077	-20	1	0.0024129	0.559	4.07257	2.85773	-9.2861	17	21	7	CDS		0	0
hsa-miR-1178-3p	NM_001261841	TMC5	((((.(((..(((((((((((&)))))))...................))))..))).)))).	3819	3860	0.846154	-19.3	1	0.000206541	0.632	0.376876	0.196615	-10.3555	18	41	7	3UTR		0	0
hsa-miR-1178-3p	NM_001261843	ZNF623	..((((.((((((((((((((&)))))))............))))))))))).	303	334	0.846154	-23	1	7.92453e-05	0.382	-0.832098	-0.144717	-6.50069	18	31	11	CDS		0	0
hsa-miR-1178-3p	NM_001261843	ZNF623	((((((((((((.(((((...&)))))))))).))))))).	3103	3122	1	-22.8	1	0.00985528	0.529	-0.240831	-0.105684	-5.22671	17	19	10	3UTR		0	0
hsa-miR-1178-3p	NM_001261843	ZNF623	.(.((((((((((((((((((&)))).)))....................))))))))))).).	2854	2896	0.807692	-20	1	0.000588676	0.412	-0.26969	-0.404433	-5.35086	19	42	11	3UTR		0	0
hsa-miR-1178-3p	NM_001261844	TESPA1	((((((((((((((((((((.&))))))))))...)))..))))))).	1688	1714	0.923077	-24.3	1	0.0174175	0.485	-0.509096	0.196057	-3.93757	20	26	10	3UTR		0	0
hsa-miR-1178-3p	NM_001261844	TESPA1	..((((.(((..(((((((((&)))))))))...))).)))).	3269	3290	0.923077	-23.3	1	2.96189e-05	0.471	0.800557	2.03295	-12.6723	16	21	9	3UTR		0	0
hsa-miR-1178-3p	NM_001261844	TESPA1	(((((((((((((((((((((&)))))))))))......................))))))).))).	2653	2698	0.923077	-21.9	1	0.0335165	0.559	0.834187	0.428857	-3.93757	21	45	11	3UTR		0	0
hsa-miR-1178-3p	NM_001261844	TESPA1	((.((((((((((((((((((&)))).)))))........))))))))).)).	1417	1448	0.923077	-20.2	1	0.0141099	0.441	-0.237063	-0.142138	-5.49511	20	31	9	CDS		0	0
hsa-miR-1178-3p	NM_001262	CDKN2C	((((((.((.(((.((((((.&)))))).))))))))))).	219	238	0.846154	-19.5	1	0.0113132	0.353	0.615584	0.584743	-7.58061	17	19	11	5UTR		0	0
hsa-miR-1178-3p	NM_001263	CDS1	(((.(((..((((((((((..&)))))))))))))))).	1673	1690	0.923077	-18.1	1	0.0620547	0.588	0.800928	1.77063	-10.3396	16	17	16	3UTR		0	0
hsa-miR-1178-3p	NM_001263	CDS1	..((.(((((..(((((((..&.))))))))))))..)).	294	331	0.846154	-17.8	1	1.90406e-05	0.191	0.8563	0.634717	-15.2476	14	18	12	CDS		0	0
hsa-miR-1178-3p	NM_001264573	KIF18B	..(((((((((((((((((((&)))))))..)))))))..))))).	2658	2682	0.923077	-22.6	1	4.41576e-06	0.397	0.125674	0.637296	-4.957	19	24	7	CDS		0	0
hsa-miR-1178-3p	NM_001264573	KIF18B	..((((.((((((((.(((..&))).)))))))).)))).	2707	2725	0.923077	-20	1	0.0153826	0.397	0.544903	0.248289	-6.73374	15	18	8	3UTR		0	0
hsa-miR-1178-3p	NM_001265	CDX2	(((((((....((((((((((&))))))))))))))))).	3059	3077	0.923077	-21.9	1	0.0414694	0.426	2.3765	3.61699	-11.3749	17	18	17	3UTR		0	0
hsa-miR-1178-3p	NM_001265	CDX2	((((((.((.(((((((((..&))))))))).))..))).))).	104	126	1	-21.5	1	0.0648413	0.353	-0.0901673	0.228617	-6.72377	17	22	9	5UTR		0	0
hsa-miR-1178-3p	NM_001265	CDX2	.(((((((.((((((..((((&))))..))))))))))))).	327	347	0.807692	-20.5	1	5.18978e-07	0.397	-0.27207	-0.330735	-5.08276	17	20	13	CDS		0	0
hsa-miR-1178-3p	NM_001265578	FAM13A	....(((((((((((((((..&.)).))))))))))))).	956	978	0.961538	-22.6	1	3.4816e-06	0.382	-0.128825	0.18178	-9.54656	15	18	13	CDS		0	0
hsa-miR-1178-3p	NM_001265578	FAM13A	..(((((((((((((......&))))))))))))).	3553	3567	0.846154	-18.1	1	2.54548e-06	0.485	5.1302	4.47716	-5.19005	13	14	13	3UTR		0	0
hsa-miR-1178-3p	NM_001265579	FAM13A	....(((((((((((((((..&.)).))))))))))))).	998	1020	0.961538	-22.6	1	3.4816e-06	0.382	-0.119663	-0.143485	-9.54656	15	18	13	CDS		0	0
hsa-miR-1178-3p	NM_001265579	FAM13A	..((((.((.((((((((...&)))))))).)))))).	3166	3182	0.846154	-19.1	1	0.000693335	0.441	5.88126	4.27303	-7.74319	14	16	8	3UTR		0	0
hsa-miR-1178-3p	NM_001265579	FAM13A	..(((((((((((((......&))))))))))))).	3511	3525	0.846154	-18.1	1	2.54548e-06	0.485	4.77405	4.62897	-5.19005	13	14	13	3UTR		0	0
hsa-miR-1178-3p	NM_001265580	FAM13A	....(((((((((((((((..&.)).))))))))))))).	914	936	0.961538	-22.6	1	3.4816e-06	0.382	0.393432	0.47681	-9.54656	15	18	13	CDS		0	0
hsa-miR-1178-3p	NM_001265580	FAM13A	..((((.((.((((((((...&)))))))).)))))).	3166	3182	0.846154	-19.1	1	0.000693335	0.441	5.14466	4.74663	-7.74319	14	16	8	3UTR		0	0
hsa-miR-1178-3p	NM_001265580	FAM13A	..(((((((((((((......&))))))))))))).	3511	3525	0.846154	-18.1	1	2.54548e-06	0.485	4.68745	4.54347	-5.19005	13	14	13	3UTR		0	0
hsa-miR-1178-3p	NM_001265581	TTI2	(((((..(((.....((((((&)))))))))..))))).	518	535	0.923077	-16.3	1	0.000273316	0.368	1.17579	1.14502	-16.4352	14	17	9	CDS		0	0
hsa-miR-1178-3p	NM_001265582	URM1	..(((((((((((((((((..&.)))))))))))).....))))).	272	308	0.923077	-25.1	1	0.0165229	0.382	0.0898355	1.78777	-4.957	17	24	12	3UTR		0	0
hsa-miR-1178-3p	NM_001265582	URM1	(((((...(((((((((((..&))))))))))).))))).	2117	2135	1	-21.5	1	0.000810452	0.382	0.405925	1.42399	-9.69585	16	18	11	3UTR		0	0
hsa-miR-1178-3p	NM_001265582	URM1	..((((((((((((((((((.&))))))))))).)))..)))).	3744	3766	0.846154	-21.5	1	2.96517e-06	0.426	0.250572	0.0636984	-4.957	18	22	11	3UTR		0	0
hsa-miR-1178-3p	NM_001265589	RTN3	....(((((((((((((((((&)))))))))))))..........)))).	4187	4215	0.846154	-21.2	1	0.00339075	0.588	0.442193	0.683771	-9.54656	17	28	13	3UTR		0	1
hsa-miR-1178-3p	NM_001265590	RTN3	....(((((((((((((((((&)))))))))))))..........)))).	3851	3879	0.846154	-21.2	1	0.00339075	0.588	0.442193	0.683771	-9.54656	17	28	13	3UTR		0	1
hsa-miR-1178-3p	NM_001265591	RTN3	....(((((((((((((((((&)))))))))))))..........)))).	1543	1571	0.846154	-21.2	1	0.00339075	0.588	0.442193	0.683771	-9.54656	17	28	13	3UTR		0	1
hsa-miR-1178-3p	NM_001265592	PLEKHG5	...((..((((((((((((..&))))))))))))..)).	2221	2238	0.846154	-21.4	1	0.0436572	0.456	1.51101	3.14244	-9.95919	14	17	12	CDS		0	0
hsa-miR-1178-3p	NM_001265593	PLEKHG5	.(((.((((((((((.(((..&))).))))))))))))).	2401	2419	1	-22.4	1	0.000681776	0.368	0.954373	2.72748	-8.14541	16	18	13	CDS		0	0
hsa-miR-1178-3p	NM_001265593	PLEKHG5	...((..((((((((((((..&))))))))))))..)).	2017	2034	0.846154	-21.4	1	0.0436572	0.456	3.24221	1.01457	-9.95919	14	17	12	CDS		0	0
hsa-miR-1178-3p	NM_001265594	PLEKHG5	...((..((((((((((((..&))))))))))))..)).	2007	2024	0.846154	-21.4	1	0.0436572	0.456	2.6856	1.69433	-9.95919	14	17	12	CDS		0	0
hsa-miR-1178-3p	NM_001265595	PFDN6	((((((((.((((((((.(((&)))..)))))))))))))))).	7	29	0.923077	-22	1	0.0039521	0.552	0.167879	-0.606845	-4.99396	19	22	16	5UTR		0	0
hsa-miR-1178-3p	NM_001265595	PFDN6	((.(((.((.(((((((((..&))))))))).))..))).)).	515	536	0.923077	-20.9	1	0.265153	0.382	0.165144	1.53326	-8.28131	16	21	9	3UTR		0	0
hsa-miR-1178-3p	NM_001265595	PFDN6	...((((((((((((((((((&))))))))))........))))).))).	314	342	0.884615	-20.2	1	0.000788101	0.456	3.71403	3.67862	-6.51454	18	28	10	CDS		0	0
hsa-miR-1178-3p	NM_001265596	PFDN6	(((((((...(((((((((..&))))))))).)))).))).	527	546	0.846154	-17.9	1	0.0241057	0.456	1.06507	1.23274	-8.55011	16	19	9	3UTR		0	0
hsa-miR-1178-3p	NM_001265596	PFDN6	...((((((((((((((((((&))))))))))........))))).))).	315	343	0.884615	-20.2	1	0.000788101	0.456	3.71583	3.66926	-6.51454	18	28	10	CDS		0	0
hsa-miR-1178-3p	NM_001265602	SMC2	(((((((((((((((......&)))))))))).))))).	30	47	1	-18.4	1	0.00107385	0.441	2.22667	0.0139121	-4.17062	15	17	10	5UTR		0	0
hsa-miR-1178-3p	NM_001265602	SMC2	.(((((.((((((((((((((&))))....)))))))).....)).))))).	2724	2754	0.846154	-18.7	1	7.44217e-05	0.559	3.94247	3.94443	-5.33701	19	30	8	CDS		0	0
hsa-miR-1178-3p	NM_001265603	MORF4L1	..((((.((..((((((((..&))))))))..))..)))).	270	289	0.923077	-20.4	1	0.00491197	0.456	4.6965	4.6229	-10.568	14	19	8	5UTR		0	0
hsa-miR-1178-3p	NM_001265603	MORF4L1	((((((.(((((((((((((.&)))))..)))))))).)))))).	60	83	0.923077	-19.3	1	0.0633998	0.324	0.423089	0.588876	-5.48126	19	23	8	5UTR		0	0
hsa-miR-1178-3p	NM_001265604	MORF4L1	..((((.((..((((((((..&))))))))..))..)))).	546	565	0.923077	-20.4	1	0.00491197	0.456	3.67959	4.70219	-10.568	14	19	8	5UTR		0	0
hsa-miR-1178-3p	NM_001265604	MORF4L1	((((((.(((((((((((((.&)))))..)))))))).)))))).	60	83	1	-19.3	1	0.0633998	0.324	3.60875	1.69307	-5.48126	19	23	8	5UTR		0	0
hsa-miR-1178-3p	NM_001265609	TRAK1	.(((((..((.(((((((((.&)))))))))))..))))).	4251	4270	0.846154	-21.6	1	8.71949e-08	0.485	-0.774559	-0.343956	-10.4754	16	19	11	3UTR		0	0
hsa-miR-1178-3p	NM_001265609	TRAK1	..(((((.(((((((((((..&))))))))))).)))....)).	4091	4113	0.923077	-20.4	1	0.00723374	0.529	-0.828012	-0.195691	-7.27064	16	22	11	3UTR		0	0
hsa-miR-1178-3p	NM_001265610	TRAK1	..(((((((..((((((....&)))))).))))))).	3075	3090	1	-19.8	1	0.00132344	0.632	0.0438517	-0.197342	-9.02428	13	15	7	3UTR		0	0
hsa-miR-1178-3p	NM_001265610	TRAK1	.(((((.((((((((((....&)))))))))).))).)).	217	235	0.846154	-19.4	1	0.000253634	0.485	2.36985	1.45916	-5.33701	15	18	10	5UTR		0	0
hsa-miR-1178-3p	NM_001265611	MAPKBP1	..(((((((((.(((((((..&)).)))))..))))))))).	5724	5744	0.923077	-23.6	1	0.000128698	0.397	0.189992	-0.575677	-8.3038	16	20	9	3UTR		0	0
hsa-miR-1178-3p	NM_001265611	MAPKBP1	..((.(((((.(((((((...&))))))))))))..)).	163	180	0.846154	-20.8	1	4.69145e-05	0.382	0.792679	0.707239	-11.9008	14	17	12	5UTR		0	0
hsa-miR-1178-3p	NM_001265612	CNOT1	(((((((((((((..((((..&)).))..)))))))..)))))).	1655	1678	0.923077	-20.4	1	0.00103751	0.5	5.80234	6.31324	-5.52986	17	23	7	CDS		0	0
hsa-miR-1178-3p	NM_001265614	SLC25A25	.((((((((((((((.(((((&))).))...)))))))))).)))).	2690	2715	0.846154	-20.4	1	1.64811e-05	0.412	-0.519882	0.128906	-4.02637	19	25	10	3UTR		0	0
hsa-miR-1178-3p	NM_001265614	SLC25A25	((((((.((..((((((((..&)).))))))..)).)))))).	2856	2877	0.846154	-20.3	1	5.97187e-07	0.441	-0.23466	0.335786	-9.54854	16	21	6	3UTR		0	0
hsa-miR-1178-3p	NM_001265614	SLC25A25	...(((.((.((((((((...&)))))))).))))).	3136	3151	1	-19.9	1	0.00605194	0.324	-0.0399767	0.486724	-9.30073	13	15	8	3UTR		0	0
hsa-miR-1178-3p	NM_001265615	FAM153B	..(((((.(((((((((....&.)))))))))))))).	448	474	0.846154	-19.9	1	0.000251083	0.397	-0.15659	-0.769022	-7.27064	14	16	14	CDS		0	0
hsa-miR-1178-3p	NM_001266	CES1	((((((.((((((((((((((&)))))))...............)))))))))).))).	1834	1871	0.807692	-20.2	1	0.00482051	0.441	-0.30328	0.464622	-5.48126	20	37	10	3UTR		0	0
hsa-miR-1178-3p	NM_001267035	PWWP2A	((((.(((((((.((((((((&)))))))).)))).))))))).	2595	2617	0.923077	-22.3	1	0.000514139	0.5	1.7748	2.83299	-9.34574	19	22	8	3UTR		0	0
hsa-miR-1178-3p	NM_001267036	SLC7A8	(((((((((((((((((((..&.))))).))))))))..)))))).	83	119	0.923077	-24	1	0.00591178	0.426	0.519308	1.23843	-3.93757	19	24	8	5UTR		0	0
hsa-miR-1178-3p	NM_001267036	SLC7A8	(((((..((((((((((....&)))))))))).))))).	1317	1334	0.923077	-20	1	0.00159081	0.412	-0.0130597	0.258214	-7.38222	15	17	10	CDS		0	0
hsa-miR-1178-3p	NM_001267037	SLC7A8	(((((..((((((((((....&)))))))))).))))).	1005	1022	0.923077	-20	1	0.00159081	0.412	0.244088	0.00376882	-7.38222	15	17	10	CDS		0	0
hsa-miR-1178-3p	NM_001267037	SLC7A8	...(((((..(((((((((..&)))))))))....))))).	67	86	0.846154	-19.6	1	0.000234267	0.353	0.949342	1.00802	-8.81344	14	19	9	5UTR		0	0
hsa-miR-1178-3p	NM_001267041	ARMC8	(((((..((((((((((....&))))).)))))..))))).	351	370	0.846154	-18	1	0.014629	0.485	5.57226	4.2099	-7.38222	15	19	5	CDS		0	0
hsa-miR-1178-3p	NM_001267041	ARMC8	.((((((((((...(((((((&)))))))))))))...)))).	213	234	0.846154	-17.8	1	0.00017793	0.426	-0.115871	0.564892	-9.2861	17	21	13	5UTR		0	0
hsa-miR-1178-3p	NM_001267042	ARMC8	(((((..((((((((((....&))))).)))))..))))).	68	87	0.846154	-18	1	0.014629	0.485	5.57226	4.2099	-7.38222	15	19	5	CDS		0	0
hsa-miR-1178-3p	NM_001267042	ARMC8	..(((((((((.((((.....&))))...))))))))).	3384	3401	0.858974	-16.7	1	0.000151925	0.397	0.673932	0.0998982	-8.3038	13	17	9	3UTR		0	0
hsa-miR-1178-3p	NM_001267045	PSME3	(((((((((((((((((((..&.)))))).....))))))))))))).	62	118	0.897436	-26.9	1	0.00092816	0.324	1.16554	1.50254	-3.93757	19	26	13	5UTR		0	0
hsa-miR-1178-3p	NM_001267045	PSME3	((((((.((((((((((((..&))))))))))))..))).))).	472	494	1	-24.9	1	0.0677208	0.382	0.227276	0.586554	-5.48126	18	22	12	5UTR		0	0
hsa-miR-1178-3p	NM_001267048	ELAPOR1	..(((((((((.(((((((..&.))).))))...))))))))).	3616	3662	0.846154	-22.9	1	3.29968e-06	0.382	-0.347708	-0.0472892	-8.3038	16	22	9	3UTR		0	0
hsa-miR-1178-3p	NM_001267048	ELAPOR1	.(((.((((((.(((((((((&)))))..)))).))))))))).	3802	3824	0.846154	-22.4	1	7.24567e-07	0.456	-0.0477946	-0.27183	-11.2592	18	22	9	3UTR		0	0
hsa-miR-1178-3p	NM_001267048	ELAPOR1	...(((.(.((((((((((..&)))))))))).).))).	112	129	0.923077	-20.3	1	0.00149253	0.353	0.357965	1.49999	-9.11462	14	17	10	CDS		0	0
hsa-miR-1178-3p	NM_001267050	GPR155	..(((((((((.(((((((..&.)))..))))..))))))))).	4890	4933	0.923077	-22.1	1	0.000813104	0.456	4.7172	2.80931	-8.3038	16	22	9	3UTR	MIRT706700	0	0
hsa-miR-1178-3p	NM_001267051	GPR155	..(((((((((.(((((((..&.)))..))))..))))))))).	4760	4803	0.846154	-22.1	1	0.000813104	0.456	4.20165	3.77383	-8.3038	16	22	9	3UTR	MIRT706700	0	0
hsa-miR-1178-3p	NM_001267052	UNC45B	.(((((.((((((((((((((&))))))))))...))))))))).	851	874	0.961538	-26.8	1	0.00155827	0.426	3.31511	4.03204	-5.33701	19	23	10	CDS		0	0
hsa-miR-1178-3p	NM_001267052	UNC45B	..(((((...(((((((((((&))))))))))).))))).	3934	3952	1	-24.2	1	0.000876756	0.559	-0.0585672	0.0951814	-9.56953	16	18	11	3UTR		0	0
hsa-miR-1178-3p	NM_001267052	UNC45B	(((.((((((((..(((((((&)))))))....))))))))))).	2968	2991	1	-21.9	1	0.00611368	0.618	0.0319911	0.188099	-9.11557	18	23	11	3UTR		0	0
hsa-miR-1178-3p	NM_001267053	RIBC1	((.((((((((((((((((..&)).)))))))))))))).)).	978	999	0.846154	-23.2	1	0.0121599	0.471	-0.0449039	0.957045	-5.49511	18	21	14	3UTR		0	0
hsa-miR-1178-3p	NM_001267053	RIBC1	((((((.(((((((((((...&)))))).)))))...)).)))).	384	407	0.846154	-20.1	1	0.0364724	0.456	1.45802	1.52113	-5.48126	17	23	6	CDS		0	0
hsa-miR-1178-3p	NM_001267053	RIBC1	((.(((.((((((((((((((&)))).)...)))))))))..))).)).	839	866	0.846154	-19.2	1	0.00209411	0.456	-0.0143546	1.07508	-7.0388	19	27	9	CDS		0	0
hsa-miR-1178-3p	NM_001267056	CASP7	(((((((((((((((..((..&.))..)))))))))))).))).	1980	2032	0.923077	-20.5	1	2.27946e-05	0.485	-0.0713622	0.0301561	-4.17062	17	22	12	3UTR		0	0
hsa-miR-1178-3p	NM_001267056	CASP7	((((...(((.((((((((((&)))))))))))))..)))).	652	672	0.846154	-17.6	1	0.000187816	0.574	0.860031	3.68728	-14.326	17	20	13	CDS		0	0
hsa-miR-1178-3p	NM_001267057	CASP7	(((((((((((((((..((..&.))..)))))))))))).))).	2165	2217	1	-20.5	1	2.27946e-05	0.485	0.100323	-0.0489684	-4.17062	17	22	12	3UTR		0	0
hsa-miR-1178-3p	NM_001267058	CASP7	(((((((((((((((..((..&.))..)))))))))))).))).	1783	1835	1	-20.5	1	2.27946e-05	0.485	-0.0564331	0.0211986	-4.17062	17	22	12	3UTR		0	0
hsa-miR-1178-3p	NM_001267058	CASP7	((((...(((.((((((((((&)))))))))))))..)))).	455	475	0.846154	-17.6	1	0.000187816	0.574	1.20961	3.77468	-14.326	17	20	13	CDS		0	0
hsa-miR-1178-3p	NM_001267060	SNX17	..((((((((((...(((...&.))).)))))))))).	915	943	0.846154	-21.6	1	6.85582e-05	0.309	5.11894	5.09128	-7.83842	13	16	10	CDS		0	0
hsa-miR-1178-3p	NM_001267060	SNX17	..((.((((.(((((((((..&)))))))))...)))))).	2231	2250	0.846154	-19.8	1	0.00022738	0.426	0.850738	0.323651	-10.3185	15	19	9	3UTR		0	0
hsa-miR-1178-3p	NM_001267062	PLEKHB2	..(((((((((.(((((((..&))).))))...))))))))).	1734	1755	0.923077	-22.6	1	2.85344e-05	0.426	-0.0942567	-0.0373358	-8.3038	16	21	9	3UTR		0	0
hsa-miR-1178-3p	NM_001267062	PLEKHB2	((.((((((((((((......&)))))))))))).)).	1957	1973	1	-19.7	1	0.0329051	0.544	0.133528	0.405649	-5.72816	14	16	12	3UTR		0	0
hsa-miR-1178-3p	NM_001267065	PLEKHB2	..(((((((((.(((((((..&))).))))...))))))))).	1716	1737	0.923077	-22.6	1	2.85344e-05	0.426	-0.0942567	-0.0373358	-8.3038	16	21	9	3UTR		0	0
hsa-miR-1178-3p	NM_001267065	PLEKHB2	..(((((..((((.((((((.&))))))))))..))))).	495	513	0.820513	-21.3	1	1.41238e-06	0.382	-0.949143	-0.421482	-9.18387	15	18	10	CDS		0	0
hsa-miR-1178-3p	NM_001267065	PLEKHB2	((.((((((((((((......&)))))))))))).)).	1939	1955	1	-19.7	1	0.0329051	0.544	0.133528	0.405649	-5.72816	14	16	12	3UTR		0	0
hsa-miR-1178-3p	NM_001267066	PLEKHB2	..(((((((((.(((((((..&))).))))...))))))))).	1583	1604	0.923077	-22.6	1	2.85344e-05	0.426	-0.0942567	-0.0373358	-8.3038	16	21	9	3UTR		0	0
hsa-miR-1178-3p	NM_001267066	PLEKHB2	((.((((((((((((......&)))))))))))).)).	1806	1822	1	-19.7	1	0.0329051	0.544	0.133528	0.405649	-5.72816	14	16	12	3UTR		0	0
hsa-miR-1178-3p	NM_001267067	PLEKHB2	..(((((((((.(((((((..&))).))))...))))))))).	1562	1583	0.923077	-22.6	1	2.85344e-05	0.426	-0.0942567	-0.0373358	-8.3038	16	21	9	3UTR		0	0
hsa-miR-1178-3p	NM_001267067	PLEKHB2	((.((((((((((((......&)))))))))))).)).	1785	1801	1	-19.7	1	0.0329051	0.544	0.133528	0.405649	-5.72816	14	16	12	3UTR		0	0
hsa-miR-1178-3p	NM_001267068	PLEKHB2	..(((((((((.(((((((..&))).))))...))))))))).	1559	1580	0.923077	-22.6	1	2.85344e-05	0.426	-0.0942567	-0.0373358	-8.3038	16	21	9	3UTR		0	0
hsa-miR-1178-3p	NM_001267068	PLEKHB2	((.((((((((((((......&)))))))))))).)).	1782	1798	1	-19.7	1	0.0329051	0.544	0.133528	0.405649	-5.72816	14	16	12	3UTR		0	0
hsa-miR-1178-3p	NM_001267536	GOLGA6L4	..((((.((((((((((((..&)))....))))))))).)))).	1746	1768	0.923077	-21.1	1	0.000783047	0.485	-0.170133	-0.191844	-6.50069	16	22	9	CDS		0	0
hsa-miR-1178-3p	NM_001267550	TTN	...((((((.(((((((((..&))))))))).)))))).	31362	31379	0.923077	-25.2	1	0.0832753	0.515	3.8135	3.98297	-7.75705	15	17	9	CDS		0	0
hsa-miR-1178-3p	NM_001267550	TTN	..((.(((((.((((((((..&))))))))))))))).	12231	12247	1	-23.2	1	0.000533831	0.574	4.28974	4.12893	-11.9008	15	16	15	CDS		0	0
hsa-miR-1178-3p	NM_001267550	TTN	..(((((((((((((((((((&))))...))))))))..))))))).	82873	82898	0.846154	-23.4	1	0.00247753	0.485	2.45712	3.46618	-4.957	19	25	8	CDS		0	0
hsa-miR-1178-3p	NM_001267550	TTN	((((...(((((((((((...&)))))))))))..)))).	17928	17946	1	-22.9	1	0.000494195	0.603	3.60232	4.64208	-11.5013	15	18	11	CDS		0	0
hsa-miR-1178-3p	NM_001267551	PEMT	..(((((((((.(((((((((&))))))))).)))).........))))).	555	584	0.846154	-23.3	1	6.81036e-06	0.338	1.0265	2.67436	-8.3038	18	29	9	CDS		0	0
hsa-miR-1178-3p	NM_001267552	PEMT	..(((((((((.(((((((((&))))))))).)))).........))))).	621	650	0.846154	-23.3	1	8.05382e-06	0.368	3.36195	1.70039	-8.3038	18	29	9	CDS		0	0
hsa-miR-1178-3p	NM_001267554	F7	((((((((((((((((((((.&)))))))).....)))))))................))))).	2596	2638	0.846154	-21	1	0.00908031	0.397	-0.319697	-0.435845	-3.93757	20	42	8	3UTR		0	0
hsa-miR-1178-3p	NM_001267556	PDCD6	((((((.((((((((.(((..&.))).)))))))))))))).	468	505	0.846154	-21.1	1	0.000103142	0.426	4.11022	4.69446	-5.71431	17	20	14	CDS		0	0
hsa-miR-1178-3p	NM_001267557	PDCD6	((((((.((((((((.(((..&.))).)))))))))))))).	270	307	0.923077	-21.1	1	0.000104918	0.426	5.8298	3.37745	-5.71431	17	20	14	CDS		0	0
hsa-miR-1178-3p	NM_001267571	TBC1D2	..(((((((((((((((((((&)))))))))........)))))........))))).	1738	1774	1	-20.9	1	0.000215314	0.456	3.79609	2.63885	-4.957	19	36	9	CDS		0	0
hsa-miR-1178-3p	NM_001267571	TBC1D2	..((((.((((((((((((((&)))))))).)))..))).)))).	1668	1691	0.923077	-20.7	1	0.00537116	0.338	3.25356	3.182	-6.50069	18	23	8	CDS		0	0
hsa-miR-1178-3p	NM_001267572	TBC1D2	..(((((((((((((((((((&)))))))))........)))))........))))).	589	625	1	-20.9	1	0.000215314	0.456	3.34147	3.32058	-4.957	19	36	9	CDS		0	0
hsa-miR-1178-3p	NM_001267572	TBC1D2	..((((.((((((((((((((&)))))))).)))..))).)))).	519	542	0.846154	-20.7	1	0.00537116	0.338	1.3888	2.89039	-6.50069	18	23	8	CDS		0	0
hsa-miR-1178-3p	NM_001267578	TOR1AIP1	.(((.(((((((((((((...&)))))))))..)))).))).	252	272	0.846154	-19.7	1	0.00897354	0.265	0.608835	1.1416	-7.91236	16	20	9	CDS		0	0
hsa-miR-1178-3p	NM_001267578	TOR1AIP1	((((((((((((....(((..&)))....)))))))))))).	762	782	1	-18.4	1	0.00598585	0.485	1.22201	1.05033	-7.05204	15	20	12	CDS		0	0
hsa-miR-1178-3p	NM_001267580	PRC1	((((((.(((.((((((....&)))))).))))))))).	2293	2310	0.923077	-16.9	1	1.90678e-07	0.529	2.61426	2.89014	-8.30604	15	17	9	3UTR		0	0
hsa-miR-1178-3p	NM_001267585	FBXW10	....((((((((((((((...&)))))))))).....)))).	1265	1285	0.846154	-19.4	1	0.0110388	0.529	-0.0709333	1.44802	-9.54656	14	20	10	CDS		0	0
hsa-miR-1178-3p	NM_001267585	FBXW10	.(((((...((.((((((((.&)))))))).))))))).	1995	2012	0.923077	-18.6	1	0.00153158	0.397	3.09568	3.15608	-12.0538	15	17	8	CDS		0	0
hsa-miR-1178-3p	NM_001267585	FBXW10	.(((((.((.(((((((....&))))))).))))))).	3163	3179	0.923077	-18	1	0.0130936	0.471	2.03358	0.994402	-6.57952	14	16	7	CDS		0	0
hsa-miR-1178-3p	NM_001267586	FBXW10	....((((((((((((((...&)))))))))).....)))).	1265	1285	0.846154	-19.4	1	0.0110388	0.529	-0.0709333	1.44802	-9.54656	14	20	10	CDS		0	0
hsa-miR-1178-3p	NM_001267586	FBXW10	.(((((...((.((((((((.&)))))))).))))))).	1995	2012	1	-18.6	1	0.00152464	0.412	3.09568	3.22304	-12.0538	15	17	8	CDS		0	0
hsa-miR-1178-3p	NM_001267586	FBXW10	.(((((.((.(((((((....&))))))).))))))).	3004	3020	0.923077	-18	1	0.0130936	0.471	2.03358	0.994402	-6.57952	14	16	7	CDS		0	0
hsa-miR-1178-3p	NM_001267594	SENP1	(((((((.(((((((.((((.&)))).)))))))))))))).	2416	2436	0.923077	-21	1	0.0481287	0.559	2.8009	2.84167	-6.48426	18	20	14	3UTR		0	0
hsa-miR-1178-3p	NM_001267595	SENP1	(((((((.(((((((.((((.&)))).)))))))))))))).	2763	2783	0.923077	-21	1	0.0481287	0.559	4.00944	4.33519	-6.48426	18	20	14	3UTR		0	0
hsa-miR-1178-3p	NM_001267597	ZNF248	((((((...((((..((((((&)))))).))))....)))))).	3731	3753	0.923077	-19.4	1	0.0101681	0.603	0.33226	0.980065	-10.4436	16	22	6	3UTR		0	0
hsa-miR-1178-3p	NM_001267606	ZNF248	((((((...((((..((((((&)))))).))))....)))))).	3095	3117	0.923077	-19.4	1	0.0101681	0.603	1.1124	0.791683	-10.4436	16	22	6	3UTR		0	0
hsa-miR-1178-3p	NM_001267606	ZNF248	.((((((((.(((..(.((((&)))).)..))).)))))))).	431	452	0.923077	-19.2	1	3.67961e-05	0.397	0.0348593	0.158398	-6.62812	16	21	8	5UTR		0	0
hsa-miR-1178-3p	NM_001267607	ZNF248	..((((((((((((.((((((&.)))).)).)))....))))))))).	2563	2607	0.846154	-23	1	6.0389e-08	0.456	-0.141262	0.0436652	-5.69245	18	26	9	3UTR		0	0
hsa-miR-1178-3p	NM_001267607	ZNF248	.((((((.((.((((((((..&))))).))).)).)))))).	1241	1261	0.923077	-19.7	1	0.0231806	0.471	-0.243927	0.0659306	-8.93173	16	20	6	3UTR		0	0
hsa-miR-1178-3p	NM_001267609	GPR161	((((((.(((((((((((...&)))))).))))).)))))).	4113	4133	0.923077	-24.1	1	0.000322539	0.426	-0.0511198	-0.345642	-5.48126	17	20	6	3UTR		0	0
hsa-miR-1178-3p	NM_001267609	GPR161	..(((((((((.(((((((..&)).)))))..))))))))).	6845	6865	0.923077	-23.6	1	3.42022e-06	0.397	5.20736	2.88551	-8.3038	16	20	9	3UTR		0	0
hsa-miR-1178-3p	NM_001267609	GPR161	..((((((((..(((((((..&.)).))))))))))))).	5925	5960	0.846154	-21.2	1	0.00193851	0.456	0.35652	-0.106698	-11.1286	15	18	13	3UTR		0	0
hsa-miR-1178-3p	NM_001267610	GPR161	((((((.(((((((((((...&)))))).))))).)))))).	3843	3863	0.923077	-24.1	1	0.000322539	0.426	-0.0598972	-0.157111	-5.48126	17	20	6	3UTR		0	0
hsa-miR-1178-3p	NM_001267610	GPR161	..(((((((((.(((((((..&)).)))))..))))))))).	6575	6595	0.846154	-23.6	1	3.42022e-06	0.397	4.6596	4.92424	-8.3038	16	20	9	3UTR		0	0
hsa-miR-1178-3p	NM_001267610	GPR161	..((((((((..(((((((..&.)).))))))))))))).	5655	5690	0.923077	-21.2	1	0.00193851	0.456	-0.300527	-0.284101	-11.1286	15	18	13	3UTR		0	0
hsa-miR-1178-3p	NM_001267611	GPR161	((((((.(((((((((((...&)))))).))))).)))))).	3663	3683	0.846154	-24.1	1	0.000322539	0.426	-0.332676	-0.386071	-5.48126	17	20	6	3UTR		0	0
hsa-miR-1178-3p	NM_001267611	GPR161	..(((((((((.(((((((..&)).)))))..))))))))).	6395	6415	0.846154	-23.6	1	3.42022e-06	0.397	4.56164	4.45795	-8.3038	16	20	9	3UTR		0	0
hsa-miR-1178-3p	NM_001267611	GPR161	..((((((((..(((((((..&.)).))))))))))))).	5475	5510	0.846154	-21.2	1	0.00193851	0.456	-0.84259	-0.604411	-11.1286	15	18	13	3UTR		0	0
hsa-miR-1178-3p	NM_001267612	GPR161	((((((.(((((((((((...&)))))).))))).)))))).	4113	4133	0.923077	-24.1	1	0.000322539	0.426	-0.0511198	-0.345642	-5.48126	17	20	6	3UTR		0	0
hsa-miR-1178-3p	NM_001267612	GPR161	..(((((((((.(((((((..&)).)))))..))))))))).	6845	6865	0.923077	-23.6	1	3.42022e-06	0.397	5.20736	2.88551	-8.3038	16	20	9	3UTR		0	0
hsa-miR-1178-3p	NM_001267612	GPR161	..((((((((..(((((((..&)).))))))))))))).	5943	5960	0.923077	-20.9	1	0.00193851	0.456	-0.0869868	0.116698	-11.1286	15	17	13	3UTR		0	0
hsa-miR-1178-3p	NM_001267613	GPR161	((((((.(((((((((((...&)))))).))))).)))))).	3512	3532	0.846154	-24.1	1	0.000322539	0.426	-0.251422	-0.534068	-5.48126	17	20	6	3UTR		0	0
hsa-miR-1178-3p	NM_001267613	GPR161	..(((((((((.(((((((..&)).)))))..))))))))).	6244	6264	0.846154	-23.6	1	3.42022e-06	0.397	3.14662	3.64963	-8.3038	16	20	9	3UTR		0	0
hsa-miR-1178-3p	NM_001267613	GPR161	..((((((((..(((((((..&.)).))))))))))))).	5324	5359	0.923077	-21.2	1	0.00193851	0.456	-0.333379	0.231681	-11.1286	15	18	13	3UTR		0	0
hsa-miR-1178-3p	NM_001267614	GPR161	((((((.(((((((((((...&)))))).))))).)))))).	3245	3265	0.923077	-24.1	1	0.000322539	0.426	-0.315265	-0.18584	-5.48126	17	20	6	3UTR		0	0
hsa-miR-1178-3p	NM_001267614	GPR161	..(((((((((.(((((((..&)).)))))..))))))))).	5977	5997	1	-23.6	1	3.42022e-06	0.397	1.34939	1.55399	-8.3038	16	20	9	3UTR		0	0
hsa-miR-1178-3p	NM_001267614	GPR161	..((((((((..(((((((..&.)).))))))))))))).	5057	5092	0.846154	-21.2	1	0.00193851	0.456	-1.28461	-0.46196	-11.1286	15	18	13	3UTR		0	0
hsa-miR-1178-3p	NM_001267615	SLC4A8	((((((..((((((((((((.&))))))))))))...)))))).	438	460	0.884615	-26.1	1	0.0148958	0.5	5.34365	4.18641	-7.7949	18	22	12	CDS		0	0
hsa-miR-1178-3p	NM_001267616	ARPP21	.(((((((.((((((.((((.&.)))).)))))).))))))).	244	275	0.923077	-23	1	0.000809	0.353	0.0703668	0.159515	-5.08276	17	21	7	5UTR		0	0
hsa-miR-1178-3p	NM_001267616	ARPP21	(((((((((.(((((((((..&)).))))))).))..))))))).	1121	1144	1	-21.7	1	0.0021504	0.456	2.87491	2.59422	-5.18008	18	23	7	CDS		0	0
hsa-miR-1178-3p	NM_001267617	ARPP21	(((((((((.(((((((((..&)).))))))).))..))))))).	282	305	1	-21.7	1	0.0021504	0.456	2.87491	2.59422	-5.18008	18	23	7	CDS		0	0
hsa-miR-1178-3p	NM_001267617	ARPP21	(((((((.(((((((((....&)))))))))..))))))).	241	260	1	-18.9	1	0.00014393	0.588	3.47151	1.61094	-6.25121	16	19	9	5UTR		0	0
hsa-miR-1178-3p	NM_001267618	ARPP21	(((((((((.(((((((((..&.)).))))))).))..))))))).	393	433	1	-21.8	1	0.0021504	0.456	1.60741	2.46198	-5.18008	18	24	7	CDS		0	0
hsa-miR-1178-3p	NM_001267618	ARPP21	(((((((.(((((((((....&)))))))))..))))))).	369	388	1	-18.9	1	0.00014393	0.588	3.47151	1.61094	-6.25121	16	19	9	5UTR		0	0
hsa-miR-1178-3p	NM_001267623	ITPA	..((((.((((.(((((((((&)))).))))).)))))))).	111	131	0.846154	-21.5	1	0.000393901	0.397	4.59275	3.38034	-9.84749	17	20	8	CDS		0	0
hsa-miR-1178-3p	NM_001267623	ITPA	((((.....(((((((((((.&)))))))))))...)))).	810	829	0.846154	-20.3	1	0.000325717	0.5	0.765706	0.0288514	-14.8713	15	19	11	3UTR		0	0
hsa-miR-1178-3p	NM_001267623	ITPA	..(((..((((((((((....&))))))))))..))).	660	676	0.846154	-19.6	1	2.18909e-07	0.382	0.818361	0.00931497	-8.40165	13	16	10	3UTR		0	0
hsa-miR-1178-3p	NM_001267700	PHB2	((((.((((((((((((((((&)))))).....)))))))))).)))).	1202	1229	0.923077	-22.9	1	7.62373e-05	0.5	1.09326	1.01511	-8.05661	20	27	10	3UTR		0	0
hsa-miR-1178-3p	NM_001267706	CD274	..((.((((((((((((((..&)))))).....))))))))..)).	1773	1797	0.884615	-20.4	1	0.000339747	0.485	-0.259856	-0.0397356	-9.07604	16	24	8	3UTR		0	1
hsa-miR-1178-3p	NM_001267706	CD274	(((.((((.((((..((((..&))))..))))))))))).	662	680	0.846154	-17	1	0.00106933	0.382	0.812541	0.652292	-9.61828	15	18	11	3UTR		0	1
hsa-miR-1178-3p	NM_001267708	ZNF706	..((((((((....(((....&.)))....)))))))).	1310	1333	0.923077	-17.8	1	0.000199419	0.588	0.630882	0.784247	-13.2745	11	17	8	3UTR		0	0
hsa-miR-1178-3p	NM_001267718	IL11	(((((((((((.(((((((((&)))))..)))).)))))))).))).	1260	1285	0.846154	-24.3	1	3.14063e-07	0.397	0.121301	0.508465	-7.28438	20	25	8	3UTR		0	0
hsa-miR-1178-3p	NM_001267718	IL11	((.(((.(((((((.((((((&)))))).)))))))...))).)).	1075	1099	0.846154	-21.7	1	0.0234355	0.368	-0.172695	-0.333855	-7.77425	18	24	7	3UTR		0	0
hsa-miR-1178-3p	NM_001267718	IL11	((.(((.((((((((((((((&)))))).)))))))).))).)).	925	948	0.923077	-19.8	1	0.0110739	0.529	-0.180133	-0.179883	-7.0388	19	23	8	3UTR		0	0
hsa-miR-1178-3p	NM_001267721	NOXO1	((((((.((((((((((((((&))))))))))))))...)))))).	1461	1485	0.923077	-28.7	1	0.000199316	0.235	-0.273838	-0.608738	-5.48126	20	24	14	3UTR		0	0
hsa-miR-1178-3p	NM_001267722	SRP72	..((((.((((..((((((..&)))))).....)))))))).	1643	1663	0.846154	-18.4	1	0.000704278	0.5	7.06816	5.50229	-11.1366	14	20	8	CDS		0	0
hsa-miR-1178-3p	NM_001267722	SRP72	....(((((.(((((((....&))))))).))))).	1427	1441	0.923077	-17.8	1	0.00610203	0.574	6.09126	4.3331	-10.7891	12	14	7	CDS		0	0
hsa-miR-1178-3p	NM_001267723	CCDC61	.(((.(((...((((((((..&)))))))).))).))).	1771	1788	0.820513	-19.5	1	4.9014e-08	0.5	1.04536	0.357977	-13.036	14	17	8	3UTR		0	0
hsa-miR-1178-3p	NM_001267727	ARSG	(((((((.((((((((((((.&)))))......)))))))...))))))).	766	795	0.923077	-19.6	1	0.00948921	0.471	4.34029	2.07085	-6.25121	19	29	7	CDS		0	0
hsa-miR-1178-3p	NM_001267783	AMBRA1	((((((((((((((((((((.&.)))))...))))))))))))))).	4447	4497	0.884615	-28.4	1	0.0059701	0.397	4.89956	5.01001	-3.93757	20	25	15	3UTR		0	0
hsa-miR-1178-3p	NM_001267798	PTPRC	(((((..((((((((......&.))))))))..))))).	385	426	0.846154	-17.2	1	0.00302374	0.5	-0.075264	-0.0240247	-7.61527	13	17	8	CDS		0	0
hsa-miR-1178-3p	NM_001267803	PAAF1	..((((((((.((((((((..&)).))))))..)))))))).	4584	4604	0.846154	-21.1	1	5.73286e-05	0.441	0.320493	0.0287176	-7.78178	16	20	8	3UTR		0	0
hsa-miR-1178-3p	NM_001267803	PAAF1	((.((((.(.(((((((((..&))))))))).).)))).)).	4746	4766	1	-20	1	0.0402747	0.485	-0.201992	0.00594062	-9.05126	16	20	9	3UTR		0	0
hsa-miR-1178-3p	NM_001267805	PAAF1	..((((((((.((((((((..&)).))))))..)))))))).	4571	4591	0.846154	-21.1	1	5.73286e-05	0.441	0.320493	0.0287176	-7.78178	16	20	8	3UTR		0	0
hsa-miR-1178-3p	NM_001267805	PAAF1	((.((((.(.(((((((((..&))))))))).).)))).)).	4733	4753	1	-20	1	0.0402747	0.485	-0.201992	0.00594062	-9.05126	16	20	9	3UTR		0	0
hsa-miR-1178-3p	NM_001267806	PAAF1	..((((((((.((((((((..&)).))))))..)))))))).	4488	4508	0.846154	-21.1	1	5.73286e-05	0.441	0	0	-7.78178	16	20	8	3UTR		0	0
hsa-miR-1178-3p	NM_001267806	PAAF1	((.((((.(.(((((((((..&))))))))).).)))).)).	4650	4670	1	-20	1	0.0402747	0.485	0	0	-9.05126	16	20	9	3UTR		0	0
hsa-miR-1178-3p	NM_001267809	ILF2	...((..(((((((((((((.&)))))))))..))))..)).	1357	1377	0.846154	-20.6	1	0.145663	0.574	4.85043	4.68173	-9.95919	15	20	9	3UTR		0	0
hsa-miR-1178-3p	NM_001267810	EIF6	(((((((((((((((((((..&)).))))))))))..........))))))).	313	344	0.846154	-21.9	1	0.000330068	0.412	5.26369	3.1526	-3.93757	19	31	10	CDS		0	0
hsa-miR-1178-3p	NM_001267814	SLC12A9	..((((((((.....((((..&))))..)))))))).	357	372	0.846154	-17.6	1	2.67662e-07	0.368	1.02798	3.12565	-14.01	12	15	8	CDS		0	0
hsa-miR-1178-3p	NM_001267822	ZMYND15	(((((..((((((((((((..&))))))))))))...))))).	2387	2408	1	-23.6	1	0.0117951	0.618	0.185068	0.314166	-7.38222	17	21	12	3UTR		0	0
hsa-miR-1178-3p	NM_001267822	ZMYND15	((.(((.((.((((((((((.&)))))))))).))))).)).	398	418	0.923077	-23.4	1	0.261836	0.471	2.58524	1.16354	-8.28131	17	20	10	CDS		0	0
hsa-miR-1178-3p	NM_001267822	ZMYND15	...((((((.(((((((((..&))))).)))).)))))).	643	661	1	-22.4	1	0.0224039	0.441	1.18171	1.08817	-7.75705	15	18	6	CDS		0	0
hsa-miR-1178-3p	NM_001267827	ZNF839	..((((((((....((((...&))))...)))))))).	1965	1981	0.923077	-20.6	1	0.000398998	0.456	0.095732	-0.0882419	-13.2745	12	16	8	CDS		0	0
hsa-miR-1178-3p	NM_001267828	ZNF839	..((((((((....((((...&))))...)))))))).	2144	2160	0.923077	-20.6	1	0.000398998	0.456	0.095732	-0.0882419	-13.2745	12	16	8	CDS		0	0
hsa-miR-1178-3p	NM_001267843	CLOCK	.((((.((.((((.(((((((&))))))).))))...)).)))).	8351	8374	0.923077	-19.1	1	0.00472948	0.603	4.64409	4.19609	-7.60751	17	23	7	3UTR		0	0
hsa-miR-1178-3p	NM_001268284	LRRC8E	((((((.(((((((((((...&))))))))))))))))).	2736	2754	1	-25	1	3.02666e-06	0.324	0.480012	0.0682424	-5.48126	17	18	17	3UTR		0	0
hsa-miR-1178-3p	NM_001268284	LRRC8E	(((((((((.((((((.....&.)))))).))))))))).	905	930	0.923077	-23.4	1	2.13088e-05	0.485	6.00426	3.69374	-5.18008	15	18	9	CDS		0	0
hsa-miR-1178-3p	NM_001269	RCC1	..((((.((((((((((((..&)))))))))))).........)))).	2170	2196	0.923077	-21.4	1	0.000733048	0.441	-0.0346589	0.677235	-6.50069	16	26	12	3UTR		0	0
hsa-miR-1178-3p	NM_001269	RCC1	..((((.((((((.(((((..&))))).)))))).)))).	1561	1579	0.923077	-21.2	1	0.0250626	0.485	-0.258701	0.54617	-7.35753	15	18	6	3UTR		0	0
hsa-miR-1178-3p	NM_001269039	SHOC2	((((((.((.(((((((((..&)).))))))).)).)))))).	5	26	0.846154	-23.3	1	0.0112671	0.309	0	0	-6.72377	17	21	7	5UTR		0	0
hsa-miR-1178-3p	NM_001269039	SHOC2	....(((((((((((((((..&)))))))).......))))))).	2671	2694	0.923077	-20.9	1	0.00145669	0.662	1.13184	1.45456	-9.54656	15	23	8	3UTR		0	0
hsa-miR-1178-3p	NM_001269039	SHOC2	....((((((..((((((...&))))))..)))))).	3174	3189	1	-19.6	1	2.91072e-05	0.559	0.899309	2.50373	-15.7181	12	15	6	3UTR		0	0
hsa-miR-1178-3p	NM_001269039	SHOC2	...((((.(((((((((((..&))))))))))).)))).	2623	2640	0.923077	-17.9	1	0.0290703	0.632	1.35655	1.7198	-8.82818	15	17	11	3UTR		0	0
hsa-miR-1178-3p	NM_001269040	CTCFL	..((((.(..(((((((((((&)))).)))))))..))))).	370	390	0.846154	-20.5	1	0.00901649	0.338	-0.543121	-0.179486	-8.79958	16	20	7	CDS		0	0
hsa-miR-1178-3p	NM_001269040	CTCFL	...(((.(((((((((((.((&.)).).))))))))))))).	706	752	0.846154	-20.2	1	0.0162831	0.559	-0.880134	-0.285602	-8.05823	16	20	13	CDS		0	0
hsa-miR-1178-3p	NM_001269041	CTCFL	...(((.(((((((((((.((&.)).).))))))))))))).	1178	1224	0.923077	-20.2	1	0.0162831	0.559	-0.666229	-0.390353	-8.05823	16	20	13	CDS		0	0
hsa-miR-1178-3p	NM_001269043	CTCFL	..((((.(..(((((((((((&)))).)))))))..))))).	291	311	0.846154	-20.5	1	0.00901649	0.338	-0.519237	-0.107571	-8.79958	16	20	7	CDS		0	0
hsa-miR-1178-3p	NM_001269043	CTCFL	...(((.(((((((((((.((&.)).).))))))))))))).	640	673	0.948718	-20.2	1	0.0162831	0.559	-0.113685	-0.0754648	-8.05823	16	20	13	CDS		0	0
hsa-miR-1178-3p	NM_001269044	CTCFL	(((((((((((((.(((((..&.))).)).))))))))))))).	2990	3025	0.846154	-22.9	1	9.9004e-05	0.397	-0.610852	-0.403923	-4.79441	18	22	13	3UTR		0	0
hsa-miR-1178-3p	NM_001269044	CTCFL	...(((.(((((((((((.((&)).).))))))))))))).	1205	1224	0.923077	-20	1	0.0162831	0.559	3.50912	3.04452	-8.05823	16	19	13	CDS		0	0
hsa-miR-1178-3p	NM_001269046	CTCFL	...(((.(((((((((((.((&.)).).))))))))))))).	1152	1198	0.923077	-20.2	1	0.0162831	0.559	0.0950236	-0.112905	-8.05823	16	20	13	CDS		0	0
hsa-miR-1178-3p	NM_001269049	CTCFL	(((((((((((((.(((((..&.))).)).))))))))))))).	1885	1920	1	-22.9	1	9.9004e-05	0.397	1.8457	2.00327	-4.79441	18	22	13	3UTR		0	0
hsa-miR-1178-3p	NM_001269049	CTCFL	...(((.(((((((((((.((&)).).))))))))))))).	100	119	1	-20	1	0.0162727	0.456	0.201579	-0.0411033	-8.05823	16	19	13	5UTR		0	0
hsa-miR-1178-3p	NM_001269050	CTCFL	...(((.(((((((((((.((&)).).))))))))))))).	113	132	1	-20	1	0.0162727	0.456	-0.536969	-0.176854	-8.05823	16	19	13	5UTR		0	0
hsa-miR-1178-3p	NM_001269051	CTCFL	...(((.(((((((((((.((&.)).).))))))))))))).	706	752	0.923077	-20.2	1	0.0162831	0.559	0.195697	-0.246162	-8.05823	16	20	13	CDS		0	0
hsa-miR-1178-3p	NM_001269052	CTCFL	...(((.(((((((((((.((&.)).).))))))))))))).	1178	1224	0.923077	-20.2	1	0.0162831	0.559	-0.502176	-0.35966	-8.05823	16	20	13	CDS		0	0
hsa-miR-1178-3p	NM_001269054	CTCFL	(((((((((((((.(((((..&.))).)).))))))))))))).	1667	1709	0.826923	-22.9	1	9.9004e-05	0.397	4.27155	4.18564	-4.79441	18	22	13	3UTR		0	0
hsa-miR-1178-3p	NM_001269055	CTCFL	..(((((((((.((((.....&))))..))))))))).	1633	1649	0.923077	-19.7	1	7.55188e-06	0.412	4.54336	3.90552	-8.3038	13	16	9	3UTR		0	0
hsa-miR-1178-3p	NM_001270	CHD1	(((((((((.((((((((...&)))))))).))))))))).	15	34	0.846154	-29.1	1	0.00119896	0.27	1.75464	1.32117	-5.18008	17	19	9	5UTR		0	0
hsa-miR-1178-3p	NM_001270040	REG3G	..((((((((((((((((...&.))))))..)))))..))))).	548	601	0.846154	-21	1	9.84539e-06	0.426	1.2912	0.0439457	-4.957	16	22	6	CDS		0	0
hsa-miR-1178-3p	NM_001270362	RAD23A	..((((((((((((((((.((&)))))))).))))).))))).	1422	1443	0.846154	-21.7	1	0.000227293	0.368	0.0566713	0.674103	-4.957	18	21	8	3UTR		0	0
hsa-miR-1178-3p	NM_001270363	RAD23A	..((((((((((((((((.((&.)))))))).))))).))))).	1238	1281	0.846154	-22.2	1	0.000227293	0.368	1.30284	0.255145	-4.957	18	22	8	3UTR		0	0
hsa-miR-1178-3p	NM_001270364	ALDH1L1	((((.(((((.((((((((..&.)))))))).))))).)))).	1660	1698	0.923077	-26.3	1	0.016826	0.368	5.00709	3.12957	-10.8814	17	21	8	CDS		0	0
hsa-miR-1178-3p	NM_001270365	ALDH1L1	(((((((((..((((((....&))))))....))))))))).	2025	2045	0.980769	-21.2	1	0.00623008	0.368	4.58094	2.72279	-8.00486	15	20	9	CDS		0	0
hsa-miR-1178-3p	NM_001270377	ANKRD46	(((((..((((((((((..((&.))..))))))))))..))))).	544	589	0.923077	-21.1	1	0.0493552	0.544	0.187741	0.399274	-7.38222	17	23	10	CDS		0	0
hsa-miR-1178-3p	NM_001270378	ANKRD46	(((((..((((((((((..((&.))..))))))))))..))))).	1233	1262	0.923077	-21.1	1	0.0493552	0.544	0.446336	0.263912	-7.38222	17	23	10	CDS		0	0
hsa-miR-1178-3p	NM_001270379	ANKRD46	(((((..((((((((((..((&.))..))))))))))..))))).	544	589	0.923077	-21.1	1	0.0493552	0.544	-0.38581	0.300295	-7.38222	17	23	10	CDS		0	0
hsa-miR-1178-3p	NM_001270380	XRRA1	((((((((((((((((((((.&)))))))))..............)))))).))))).	33	69	0.846154	-24.4	1	1.34108e-06	0.25	-0.00383471	0.272709	-3.93757	20	36	9	5UTR		0	0
hsa-miR-1178-3p	NM_001270380	XRRA1	(((((.(((.(((((((((..&)))))))))..)))...))))).	445	468	0.846154	-19.2	1	0.00281953	0.515	0.458639	0.0241486	-7.08104	17	23	9	CDS		0	0
hsa-miR-1178-3p	NM_001270381	XRRA1	((((((((((((((((((((.&)))))))))..............)))))).))))).	33	69	0.846154	-24.4	1	1.34108e-06	0.25	-0.00383471	0.272709	-3.93757	20	36	9	5UTR		0	0
hsa-miR-1178-3p	NM_001270381	XRRA1	(((((.(((.(((((((((..&)))))))))..)))...))))).	279	302	0.846154	-19.2	1	0.00281953	0.515	0.415645	0.145064	-7.08104	17	23	9	5UTR		0	0
hsa-miR-1178-3p	NM_001270383	ENKUR	..((((.((((.(((((((..&))))))).......)))))))).	757	780	0.871795	-18.3	1	0.000366697	0.5	-0.1107	-0.1504	-9.84749	15	23	8	CDS		0	0
hsa-miR-1178-3p	NM_001270384	MIGA1	..(((((((((.(((((((..&)).)))))..))))))))).	2931	2951	0.923077	-23.6	1	3.34315e-06	0.397	0.0985722	0.00879031	-8.3038	16	20	9	3UTR		0	0
hsa-miR-1178-3p	NM_001270384	MIGA1	(((((((((...((((((...&))))))....))))))))).	5021	5041	0.923077	-22.8	1	4.68327e-06	0.441	-0.153079	-0.0213095	-11.3517	15	20	9	3UTR		0	0
hsa-miR-1178-3p	NM_001270384	MIGA1	((((((((.(((((((((.((&))))))))..))))))))))).	64	86	0.846154	-20.9	1	3.37203e-06	0.338	0.000349709	0.362542	-4.99396	19	22	11	CDS		0	0
hsa-miR-1178-3p	NM_001270391	RASSF6	..(((((((((((.(((((((&)))))))))))....................))))))).	479	518	0.923077	-21	1	0.00232453	0.529	0.169022	-0.101745	-5.81384	18	39	11	CDS		0	0
hsa-miR-1178-3p	NM_001270392	RASSF6	..(((((((((((.(((((((&)))))))))))....................))))))).	391	430	0.923077	-21	1	0.00232453	0.529	-0.0157338	0.0916235	-5.81384	18	39	11	CDS		0	0
hsa-miR-1178-3p	NM_001270396	GLIPR1L2	((.(((.((.(((((((((..&)))))).))).))))).)).	915	935	0.846154	-19.1	1	0.5412	0.544	-0.291309	-0.138642	-8.28131	16	20	6	CDS		0	0
hsa-miR-1178-3p	NM_001270398	PTK7	..((((((...((((((((((&)))))))))))))))).	2497	2514	0.923077	-23.1	1	0.00173188	0.397	3.85518	3.94959	-10.0807	16	17	16	CDS		0	0
hsa-miR-1178-3p	NM_001270398	PTK7	..(((((((.((((((((...&)))))).)).))))))).	3994	4012	0.846154	-22.9	1	0.000127923	0.324	0.970714	1.41263	-6.19951	15	18	7	3UTR		0	0
hsa-miR-1178-3p	NM_001270398	PTK7	..((((((((.((((((((((&)))))))))).)))........))))).	3657	3685	0.923077	-21.5	1	3.22227e-05	0.456	0.570847	0.252519	-7.78178	18	28	10	3UTR		0	0
hsa-miR-1178-3p	NM_001270400	TUBA1A	..(((((((.(((((((....&)))))))))))))).	1427	1442	0.884615	-18.6	1	0.0361553	0.397	6.58183	4.31514	-6.19951	14	15	14	CDS		0	0
hsa-miR-1178-3p	NM_001270402	KCNE1	.((.((((((((((((((((.&)))))))))...........................))))))))).	1985	2031	1	-20.8	1	0.00252433	0.397	-0.427912	-0.306282	-6.82535	18	46	9	3UTR		0	0
hsa-miR-1178-3p	NM_001270403	KCNE1	.((((((((((((((((((..&))).))))))))))....................))))).	1161	1201	0.846154	-20.9	1	0.0273731	0.426	-0.246631	-0.419749	-3.79332	18	40	10	3UTR		0	0
hsa-miR-1178-3p	NM_001270403	KCNE1	.((.((((((((((((((((.&)))))))))...........................))))))))).	1948	1994	1	-20.8	1	0.00252433	0.397	-0.174845	-0.432783	-6.82535	18	46	9	3UTR		0	0
hsa-miR-1178-3p	NM_001270404	KCNE1	.((((((((((((((((((..&))).))))))))))....................))))).	1087	1127	0.846154	-20.9	1	0.0273731	0.426	-0.0392737	-0.648525	-3.79332	18	40	10	3UTR		0	0
hsa-miR-1178-3p	NM_001270404	KCNE1	.((.((((((((((((((((.&)))))))))...........................))))))))).	1874	1920	1	-20.8	1	0.00252433	0.397	-0.336808	-0.41102	-6.82535	18	46	9	3UTR		0	0
hsa-miR-1178-3p	NM_001270405	KCNE1	.((.((((((((((((((((.&)))))))))...........................))))))))).	1801	1847	0.923077	-20.8	1	0.00252433	0.397	-0.0862714	-0.269555	-6.82535	18	46	9	3UTR		0	0
hsa-miR-1178-3p	NM_001270407	JAM2	(((((((((.(((((((((..&)))))))))...)))..)))))).	23	47	0.923077	-21.1	1	0.000196065	0.471	0.343567	0.170672	-5.18008	18	24	9	5UTR		0	0
hsa-miR-1178-3p	NM_001270407	JAM2	.((((((.((((((.((((..&)))).)))))).)))))).	3857	3876	1	-18.8	1	0.0174299	0.662	0.579241	0.390524	-6.84241	16	19	6	3UTR		0	0
hsa-miR-1178-3p	NM_001270408	JAM2	..(((((((((.(((((((..&.)).)))))..))))))))).	1611	1644	0.846154	-24.3	1	9.52512e-06	0.382	0.410999	0.167006	-8.3038	16	21	9	3UTR		0	0
hsa-miR-1178-3p	NM_001270408	JAM2	(((((((((.(((((((((..&)))))))))...)))..)))))).	23	47	0.923077	-21.1	1	0.000196065	0.471	0.488606	0.276356	-5.18008	18	24	9	5UTR		0	0
hsa-miR-1178-3p	NM_001270409	LIN9	..((((...(((((.(((...&))).)))))....)))).	43	61	0.846154	-17.4	1	9.123e-08	0.176	3.97089	2.98742	-10.6062	12	18	5	5UTR		0	0
hsa-miR-1178-3p	NM_001270420	CFC1	.((((((((((((((((((((&))))).)))))))).))).......)))).	958	988	0.923077	-19.4	1	0.000108397	0.412	1.22075	0.792865	-3.79332	20	30	8	3UTR		0	0
hsa-miR-1178-3p	NM_001270422	KCNJ16	((.((((((.(((..((((((&.))))))))).)))))).)).	2877	2907	0.923077	-18.9	1	0.00861771	0.515	-0.11489	-0.314587	-8.32991	17	21	9	3UTR		0	0
hsa-miR-1178-3p	NM_001270424	DHRS12	..((((((((((((.......&.)))))))))))).	668	701	0.923077	-19.2	1	3.30809e-05	0.412	1.67814	1.9785	-5.9255	12	14	12	CDS		0	0
hsa-miR-1178-3p	NM_001270427	PSMD5	..(((((((((.(((((((((&.))))).....))))..))))))))).	1915	1965	0.923077	-23.7	1	5.04394e-06	0.397	0	0	-8.3038	18	27	9	3UTR		0	0
hsa-miR-1178-3p	NM_001270427	PSMD5	(((((((((...((((((...&))))))...)).))))))).	1775	1795	0.923077	-20	1	0.000180225	0.515	0	0	-11.3517	15	20	7	3UTR		0	0
hsa-miR-1178-3p	NM_001270433	CDK2AP1	((((((.((((((((((((((&)))))))))).................)))).)))))).	268	307	1	-25.5	1	0.0188001	0.382	1.49749	1.44082	-5.48126	20	39	10	CDS		0	0
hsa-miR-1178-3p	NM_001270434	CDK2AP1	((((((.((((((((((((((&)))))))))).................)))).)))))).	310	349	1	-25.5	1	0.0188001	0.382	0.743095	1.31089	-5.48126	20	39	10	CDS		0	0
hsa-miR-1178-3p	NM_001270436	CDC42EP3	..(((((((((((((((((((&))))))).)))))))............))))).	3371	3404	1	-21.6	1	0.000203674	0.588	1.23231	1.38925	-4.957	19	33	7	3UTR		0	0
hsa-miR-1178-3p	NM_001270436	CDC42EP3	.(((.((((((((((((((..&))))))))..)))).)).))).	3323	3345	0.846154	-18.1	1	0.000564191	0.559	1.20174	1.60801	-7.91236	17	22	8	3UTR		0	0
hsa-miR-1178-3p	NM_001270438	CDC42EP3	..(((((((((((((((((((&))))))).)))))))............))))).	3403	3436	0.923077	-21.6	1	0.000203674	0.588	1.33082	1.54686	-4.957	19	33	7	3UTR		0	0
hsa-miR-1178-3p	NM_001270438	CDC42EP3	.(((.((((((((((((((..&))))))))..)))).)).))).	3355	3377	0.846154	-18.1	1	0.000564191	0.559	1.06107	1.33354	-7.91236	17	22	8	3UTR		0	0
hsa-miR-1178-3p	NM_001270440	RTBDN	(((((((((((.(((((((..&)))..)))).))))))).)))).	886	909	0.820513	-19.9	1	7.425e-05	0.368	-0.286797	-0.329019	-7.28438	18	23	7	CDS		0	0
hsa-miR-1178-3p	NM_001270449	UBE3B	((((((.((((((((......&)))))))))))))).	682	697	0.846154	-16.8	1	6.02277e-05	0.397	2.431	3.22668	-5.71431	14	15	14	CDS		0	0
hsa-miR-1178-3p	NM_001270450	UBE3B	((((((.((((((((......&.)))))))))))))).	324	352	0.923077	-17.4	1	6.02277e-05	0.397	4.42662	3.22281	-5.71431	14	16	14	CDS		0	0
hsa-miR-1178-3p	NM_001270451	UBE3B	((((((.((((((((......&.)))))))))))))).	336	364	0.923077	-17.4	1	6.02277e-05	0.397	4.42662	3.22281	-5.71431	14	16	14	CDS		0	0
hsa-miR-1178-3p	NM_001270455	WWP2	((((((..((((((((.....&))))))))....)))))).	395	414	0.846154	-16.9	1	0.000355996	0.5	3.70789	4.89258	-7.7949	14	19	8	CDS		0	0
hsa-miR-1178-3p	NM_001270458	MAOA	.((((((.(((((((((((((&)))).)))))))))..............)))))).	1586	1621	0.923077	-20	1	0.052847	0.603	0.424349	1.62809	-6.10696	19	35	9	5UTR		0	0
hsa-miR-1178-3p	NM_001270459	ST3GAL3	((((((((((((((.(((((.&)))))....)))))))))))))).	1726	1750	0.923077	-23.8	1	3.61283e-06	0.382	0.494826	0.466513	-4.67302	19	24	14	3UTR		0	0
hsa-miR-1178-3p	NM_001270459	ST3GAL3	((((((((.(((((((.....&))))))))))))))).	775	791	1	-19.7	1	0.00292817	0.441	4.81365	4.80854	-4.99396	15	16	15	CDS		0	0
hsa-miR-1178-3p	NM_001270460	ST3GAL3	((((((((((((((.(((((.&)))))....)))))))))))))).	1723	1747	0.923077	-23.8	1	3.61283e-06	0.382	0.494826	0.466513	-4.67302	19	24	14	3UTR		0	0
hsa-miR-1178-3p	NM_001270460	ST3GAL3	((((((((.(((((((.....&))))))))))))))).	682	698	1	-19.7	1	0.00292817	0.441	4.81365	4.80854	-4.99396	15	16	15	CDS		0	0
hsa-miR-1178-3p	NM_001270461	ST3GAL3	((((((((((((((.(((((.&)))))....)))))))))))))).	1474	1498	0.923077	-23.8	1	3.61283e-06	0.382	0.494826	0.466513	-4.67302	19	24	14	3UTR		0	0
hsa-miR-1178-3p	NM_001270461	ST3GAL3	((((((((.(((((((.....&))))))))))))))).	727	743	1	-19.7	1	0.00292817	0.441	4.81365	4.80854	-4.99396	15	16	15	CDS		0	0
hsa-miR-1178-3p	NM_001270462	ST3GAL3	((((((((((((((.(((((.&)))))....)))))))))))))).	1381	1405	0.923077	-23.8	1	3.61283e-06	0.382	0.494826	0.466513	-4.67302	19	24	14	3UTR		0	0
hsa-miR-1178-3p	NM_001270462	ST3GAL3	((((((((.(((((((.....&))))))))))))))).	634	650	1	-19.7	1	0.00292817	0.441	4.81365	4.80854	-4.99396	15	16	15	CDS		0	0
hsa-miR-1178-3p	NM_001270463	ST3GAL3	((((((((((((((.(((((.&.)))))....)))))))))))))).	1319	1356	0.846154	-23.8	1	3.61283e-06	0.382	-0.368559	0.357193	-4.67302	19	25	14	3UTR		0	0
hsa-miR-1178-3p	NM_001270464	ST3GAL3	((((((((((((((.(((((.&.)))))....)))))))))))))).	1274	1311	0.846154	-23.8	1	3.61283e-06	0.382	-0.368559	0.357193	-4.67302	19	25	14	3UTR		0	0
hsa-miR-1178-3p	NM_001270465	ST3GAL3	((((((((((((((.(((((.&.)))))....)))))))))))))).	1345	1382	0.923077	-23.8	1	3.61283e-06	0.382	0.393252	0.567833	-4.67302	19	25	14	3UTR		0	0
hsa-miR-1178-3p	NM_001270466	ST3GAL3	((((((((((((((.(((((.&.)))))....)))))))))))))).	1019	1056	0.923077	-23.8	1	3.61283e-06	0.382	0.393252	0.567833	-4.67302	19	25	14	3UTR		0	0
hsa-miR-1178-3p	NM_001270467	SOCS2	((((((((((.((..(((...&))).)).)))))))))).	275	293	0.923077	-18.6	1	6.29041e-06	0.294	1.03577	-0.312197	-8.35464	15	18	10	5UTR		0	0
hsa-miR-1178-3p	NM_001270470	SOCS2	((((((((((.((..(((...&))).)).)))))))))).	504	522	0.923077	-18.6	1	0.000129451	0.294	1.03577	0.0456137	-8.35464	15	18	10	5UTR		0	0
hsa-miR-1178-3p	NM_001270472	MCM3	..((((((((.((((((((..&))).))))))))))))).	1630	1648	0.923077	-19.8	1	0.00576383	0.574	5.67922	5.50744	-7.78178	16	18	13	CDS		0	0
hsa-miR-1178-3p	NM_001270473	CENPN	..(((((((((.(((((((..&.)))))))........))))))))).	3044	3080	0.846154	-23.6	1	0.000135261	0.412	0.206709	0.0449184	-8.3038	16	26	9	3UTR		0	0
hsa-miR-1178-3p	NM_001270473	CENPN	(((((((((...((((((...&))))))....))))))))).	2889	2909	0.923077	-23.1	1	2.49257e-05	0.412	0.0954489	-0.0960108	-11.3517	15	20	9	3UTR		0	0
hsa-miR-1178-3p	NM_001270474	CENPN	..(((((((((.(((((((..&.)))))))........))))))))).	3002	3038	0.846154	-23.6	1	0.000135261	0.412	0.206709	0.0449184	-8.3038	16	26	9	3UTR		0	0
hsa-miR-1178-3p	NM_001270474	CENPN	(((((((((...((((((...&))))))....))))))))).	2847	2867	0.923077	-23.1	1	2.49257e-05	0.412	0.0954489	-0.0960108	-11.3517	15	20	9	3UTR		0	0
hsa-miR-1178-3p	NM_001270482	PSMD11	.(((((((((..((.((((..&))))......))..))))))))).	3249	3273	0.846154	-19.6	1	0.000775972	0.471	0.385215	-0.0904708	-10.7004	15	24	9	3UTR		0	0
hsa-miR-1178-3p	NM_001270484	TBXT	.(.(((((((((((((((((.&)))).)))))))).))))).).	152	174	0.923077	-21.4	1	0.000563632	0.294	-0.248632	0.0585091	-5.35086	18	22	8	5UTR		0	0
hsa-miR-1178-3p	NM_001270497	ZNF334	....((((((.((((((((..&)))))))))))..))).	930	947	0.846154	-16.4	1	0.111136	0.618	0.49256	0.0276299	-12.3713	14	17	11	CDS		0	0
hsa-miR-1178-3p	NM_001270500	CA6	.((((((((((((((((((((&)))))))))................)))))...)))))).	357	397	0.923077	-22.1	1	0.00097388	0.382	3.35525	1.96742	-3.79332	20	40	9	CDS		0	0
hsa-miR-1178-3p	NM_001270501	CA6	.((((((((((((((((((((&)))))))))................)))))...)))))).	177	217	0.923077	-22.1	1	0.00097388	0.382	3.35525	1.96742	-3.79332	20	40	9	CDS		0	0
hsa-miR-1178-3p	NM_001270508	TNFAIP3	((((((.((((((((((((((&))))))).)))))))....)))))).	2091	2117	1	-25.2	1	0.000304739	0.382	1.68565	2.64387	-5.48126	20	26	7	CDS		0	0
hsa-miR-1178-3p	NM_001270508	TNFAIP3	...(((((((((((.((((..&)))).))))))))))).	46	63	1	-24.8	1	3.03177e-06	0.279	1.00598	0.261669	-7.24999	15	17	11	5UTR		0	0
hsa-miR-1178-3p	NM_001270508	TNFAIP3	..((((((((((((((.....&)))))))))))))).	1087	1102	1	-23.4	1	0.000145689	0.515	5.57709	4.15465	-4.957	14	15	14	CDS		0	0
hsa-miR-1178-3p	NM_001270519	LATS1	.((((((((((((........&.)))))))))))).	1717	1740	0.923077	-20.7	1	1.01461e-05	0.456	4.33895	3.38429	-5.61866	12	14	12	CDS		0	0
hsa-miR-1178-3p	NM_001270522	MED23	(((((((.((..(((((((..&)).))))).)).))))))).	2489	2509	0.846154	-18.1	1	0.0522838	0.574	5.63097	6.12128	-12.4228	16	20	7	CDS		0	0
hsa-miR-1178-3p	NM_001270523	OTX2	..(((((((((((((((..((&))..)))).)))))))).....))).	1550	1576	0.846154	-18	1	0.0304214	0.588	1.49286	1.71932	-4.957	17	26	8	3UTR		0	0
hsa-miR-1178-3p	NM_001270523	OTX2	..(((.(((.(((((((((..&))))))))).)))...))).	1483	1503	0.846154	-17.7	1	0.000234801	0.588	1.25997	1.57922	-8.10047	15	20	9	3UTR		0	0
hsa-miR-1178-3p	NM_001270524	OTX2	..(((((((((((((((..((&))..)))).)))))))).....))).	1703	1729	0.923077	-18	1	0.0304214	0.588	2.72893	2.14803	-4.957	17	26	8	3UTR		0	0
hsa-miR-1178-3p	NM_001270524	OTX2	..(((.(((.(((((((((..&))))))))).)))...))).	1636	1656	0.923077	-17.7	1	0.000234801	0.588	2.16565	1.95051	-8.10047	15	20	9	3UTR		0	0
hsa-miR-1178-3p	NM_001270525	OTX2	..(((((((((((((((..((&))..)))).)))))))).....))).	1498	1524	0.846154	-18	1	0.0304214	0.588	1.226	1.47478	-4.957	17	26	8	3UTR		0	0
hsa-miR-1178-3p	NM_001270525	OTX2	..(((.(((.(((((((((..&))))))))).)))...))).	1431	1451	0.846154	-17.7	1	0.000234801	0.588	2.31283	2.26061	-8.10047	15	20	9	3UTR		0	0
hsa-miR-1178-3p	NM_001270528	RNF111	((.((((((.((((((((((.&)))))))))).))..)))).)).	3214	3237	0.884615	-23.3	1	0.12368	0.559	6.33049	6.13721	-6.73762	18	23	10	CDS		0	0
hsa-miR-1178-3p	NM_001270528	RNF111	..(((.(((((((((((((((&)))))))..)))))).))))).	5248	5270	1	-20.3	1	0.00265546	0.574	0.562661	-0.129407	-6.85796	18	22	7	3UTR		0	0
hsa-miR-1178-3p	NM_001270530	RNF111	((.((((((.((((((((((.&)))))))))).))..)))).)).	3073	3096	0.884615	-23.3	1	0.139633	0.559	5.84598	5.94019	-6.73762	18	23	10	CDS		0	0
hsa-miR-1178-3p	NM_001270530	RNF111	..(((.(((((((((((((((&)))))))..)))))).))))).	5107	5129	1	-20.3	1	0.00265546	0.574	0.498485	-0.119093	-6.85796	18	22	7	3UTR		0	0
hsa-miR-1178-3p	NM_001270531	WTAP	((((((((((((.((((((..&))).))))))))))))))).	1296	1316	0.948718	-20.5	1	0.000187757	0.471	3.69359	5.43079	-5.22671	18	20	15	CDS		0	0
hsa-miR-1178-3p	NM_001270546	AKAP13	((((((.((((..((((((..&))))))..)))))))))).	3832	3851	0.846154	-20.3	1	4.16039e-05	0.279	2.17564	2.7322	-10.1172	16	19	10	CDS		0	0
hsa-miR-1178-3p	NM_001270546	AKAP13	(((((((((((((((......&))))).)))))))))).	3549	3566	1	-19.6	1	0.00416302	0.574	4.5324	3.10979	-4.17062	15	17	10	CDS		0	0
hsa-miR-1178-3p	NM_001270550	MDK	((((((.(((((((.((((..&)))).))))))))))))).	15	34	0.980769	-23.7	1	2.30805e-06	0.365	-0.360354	0.444666	-6.21671	17	19	13	5UTR		0	0
hsa-miR-1178-3p	NM_001270550	MDK	.((((((((.((((.((((..&))))..))))..)))))))).	141	162	0.923077	-20.8	1	0.00369439	0.368	0.461846	-0.686781	-5.77128	16	21	8	5UTR		0	0
hsa-miR-1178-3p	NM_001270551	MDK	.(((((((((((((((((...&))).)).)))).)))))))).	77	98	0.846154	-20.9	1	1.83969e-05	0.176	1.09712	-0.200584	-3.79332	17	21	8	5UTR		0	0
hsa-miR-1178-3p	NM_001270552	MDK	((((((.((((((........&)))))).)))))).	77	91	0.846154	-17.1	1	4.58233e-05	0.279	0.332582	0.776649	-7.3066	12	14	6	5UTR		0	0
hsa-miR-1178-3p	NM_001270572	CSNK1G3	((((.((((((((((((((((&))))))))................))))).))))))).	421	459	0.846154	-17.7	1	0.0044122	0.662	5.03955	5.39503	-8.05661	20	38	8	CDS		0	0
hsa-miR-1178-3p	NM_001270585	IQCA1	((((.((((((((((((((..&.))))))))......)))))).)))).	2641	2682	0.923077	-24.1	1	0.000671319	0.426	3.30293	2.32727	-8.05661	18	27	8	3UTR		0	0
hsa-miR-1178-3p	NM_001270601	ASCL5	.(((.(.((.(((((((((((&))))))))))).)).).))).	1340	1361	0.923077	-21.7	1	2.77595e-06	0.397	0.0263748	0.627873	-10.6986	17	21	11	3UTR		0	0
hsa-miR-1178-3p	NM_001270614	DEDD2	..(((((.(.((((((((.((&)))))))))).)))))).	131	149	0.923077	-18.4	1	0.0125175	0.324	0.431472	0.208799	-8.51314	16	18	10	CDS		0	0
hsa-miR-1178-3p	NM_001270615	DEDD2	..(((((.(.((((((((.((&)))))))))).)))))).	116	134	0.923077	-18.4	1	0.0125175	0.324	0.207197	0.218411	-8.51314	16	18	10	CDS		0	0
hsa-miR-1178-3p	NM_001270622	SLC16A7	...((((((((((((((((..&))))))))))))...)))).	8124	8144	0.903846	-20.5	1	0.0652165	0.426	0.123694	-0.0594742	-6.51454	16	20	12	3UTR		0	0
hsa-miR-1178-3p	NM_001270622	SLC16A7	..((..(((.(((((((((..&))))))))).))).)).	9641	9658	0.923077	-20.6	1	0.0161934	0.603	0.488205	-0.159966	-12.2195	14	17	9	3UTR		0	0
hsa-miR-1178-3p	NM_001270623	SLC16A7	...((((((((((((((((..&))))))))))))...)))).	8144	8164	0.903846	-20.5	1	0.0652165	0.426	0.123694	-0.0594742	-6.51454	16	20	12	3UTR		0	0
hsa-miR-1178-3p	NM_001270623	SLC16A7	..((..(((.(((((((((..&))))))))).))).)).	9661	9678	0.923077	-20.6	1	0.0161934	0.603	0.488205	-0.159966	-12.2195	14	17	9	3UTR		0	0
hsa-miR-1178-3p	NM_001270639	JOSD2	..(((..((((((((((((..&))).)))))))))..))).	627	646	0.846154	-19.9	1	8.61331e-05	0.382	1.74289	2.81225	-8.40165	15	19	9	CDS		0	0
hsa-miR-1178-3p	NM_001270640	JOSD2	..(((..((((((((((((..&))).)))))))))..))).	624	643	0.846154	-19.9	1	8.61331e-05	0.382	1.71169	2.96138	-8.40165	15	19	9	CDS		0	0
hsa-miR-1178-3p	NM_001270641	JOSD2	..(((..((((((((((((..&))).)))))))))..))).	501	520	0.846154	-19.9	1	8.61331e-05	0.382	1.68049	2.59287	-8.40165	15	19	9	CDS		0	0
hsa-miR-1178-3p	NM_001270643	LUC7L2	((((((((((((...((((..&.)))).)))))))))))).	1667	1709	1	-24.8	1	1.80658e-05	0.515	0.98887	3.31482	-6.81899	16	19	12	3UTR		0	0
hsa-miR-1178-3p	NM_001270648	SLC5A10	...((((((((((((.(((((&)))))..)))))))))))).	2046	2066	1	-23.9	1	0.0614342	0.5	0.435391	-0.334888	-6.74759	17	20	12	3UTR		0	0
hsa-miR-1178-3p	NM_001270649	SLC5A10	...((((((((((((.(((((&)))))..)))))))))))).	2019	2039	1	-23.9	1	0.0614342	0.5	0	0	-6.74759	17	20	12	3UTR		0	0
hsa-miR-1178-3p	NM_001270649	SLC5A10	..(((..((((((((((((..&))))))))))))...))).	2822	2841	0.846154	-22.8	1	3.61875e-06	0.353	0	0	-8.40165	15	19	12	3UTR		0	0
hsa-miR-1178-3p	NM_001270660	MARCHF6	.(((.((((((.(((((((..&)))..)))).))))))))).	4868	4888	0.846154	-19.1	1	2.20723e-05	0.397	0.187394	-0.139311	-11.2592	16	20	9	3UTR		0	0
hsa-miR-1178-3p	NM_001270660	MARCHF6	..((.((((((..(((((...&)))))..)))))))).	4405	4421	0.923077	-18	1	1.79188e-06	0.456	-0.0138585	0.269709	-13.712	13	16	8	3UTR		0	0
hsa-miR-1178-3p	NM_001270661	MARCHF6	.(((.((((((.(((((((..&)))..)))).))))))))).	4697	4717	0.846154	-19.1	1	2.20723e-05	0.397	0.187394	-0.139311	-11.2592	16	20	9	3UTR		0	0
hsa-miR-1178-3p	NM_001270661	MARCHF6	..((.((((((..(((((...&)))))..)))))))).	4234	4250	0.923077	-18	1	1.79188e-06	0.456	-0.0138585	0.269709	-13.712	13	16	8	3UTR		0	0
hsa-miR-1178-3p	NM_001270679	MCU	.(.((((((.(((((((((..&))))))))).))............)))).).	1154	1185	0.846154	-19	1	8.25606e-05	0.559	1.22474	2.37786	-6.59337	16	31	9	3UTR		0	0
hsa-miR-1178-3p	NM_001270679	MCU	...(((..(((((((((((..&)).)))))))))..))).	2750	2768	1	-17.4	1	0.0757328	0.574	2.06414	2.61529	-10.3719	14	18	9	3UTR		0	0
hsa-miR-1178-3p	NM_001270680	MCU	(((((.((((((((((((...&.)))))))))))).))))).	403	429	1	-20.6	1	0.00648192	0.426	0.384524	0.932799	-5.83853	17	20	12	5UTR		0	0
hsa-miR-1178-3p	NM_001270680	MCU	.(.((((((.(((((((((..&))))))))).))............)))).).	1494	1525	0.846154	-19	1	8.25606e-05	0.559	1.22474	2.37786	-6.59337	16	31	9	3UTR		0	0
hsa-miR-1178-3p	NM_001270686	JOSD2	..(((..((((((((((((..&))).)))))))))..))).	666	685	0.846154	-19.9	1	8.61331e-05	0.382	3.79432	1.97591	-8.40165	15	19	9	CDS		0	0
hsa-miR-1178-3p	NM_001270691	SMOX	...(((((.((((((((((..&))).))))))).))))).	783	801	0.846154	-21.1	1	4.85748e-09	0.426	3.40513	5.42535	-7.57093	15	18	7	CDS		0	0
hsa-miR-1178-3p	NM_001270695	ARHGAP12	.(((((((.((((.(((....&.))).))))))))))).	1325	1360	1	-19.4	1	0.00113097	0.559	0.703392	2.13641	-5.70655	14	17	11	CDS		0	0
hsa-miR-1178-3p	NM_001270695	ARHGAP12	.(((((((((..(((((((((&)))).))))).))))...))))).	3480	3504	0.846154	-18.2	1	0.00455584	0.588	3.20082	3.55699	-9.9649	18	24	5	3UTR		0	0
hsa-miR-1178-3p	NM_001270696	ARHGAP12	.(((((((.((((.(((....&.))).))))))))))).	1280	1315	0.974359	-19.4	1	0.00113097	0.559	3.31667	2.31615	-5.70655	14	17	11	CDS		0	0
hsa-miR-1178-3p	NM_001270696	ARHGAP12	.(((((((((..(((((((((&)))).))))).))))...))))).	3360	3384	0.897436	-18.2	1	0.00455584	0.588	4.03262	4.04344	-9.9649	18	24	5	3UTR		0	0
hsa-miR-1178-3p	NM_001270697	ARHGAP12	.(((((((((..(((((((((&)))).))))).))))...))))).	3354	3378	0.846154	-18.2	1	0.00455584	0.588	3.65088	3.92279	-9.9649	18	24	5	3UTR		0	0
hsa-miR-1178-3p	NM_001270697	ARHGAP12	..((.((((.((..(((((..&)))))..)).)))))).	1240	1257	0.884615	-17.6	1	0.000373159	0.574	1.6072	2.88231	-12.4645	13	17	6	CDS		0	0
hsa-miR-1178-3p	NM_001270726	BCL2L13	(((((..(.((((((((((..&)))))))))).)..))))).	4093	4113	0.846154	-19.7	1	4.30661e-05	0.471	-0.142118	-0.342435	-8.43861	16	20	10	3UTR		0	0
hsa-miR-1178-3p	NM_001270726	BCL2L13	..(((((((.....(((((((&.)))))))))))))).	4507	4533	0.923077	-19.6	1	6.12661e-08	0.426	-0.170824	-0.207425	-14.5171	14	16	14	3UTR		0	0
hsa-miR-1178-3p	NM_001270727	BCL2L13	(((((..(.((((((((((..&)))))))))).)..))))).	3949	3969	0.846154	-19.7	1	4.30661e-05	0.471	-0.142118	-0.342435	-8.43861	16	20	10	3UTR		0	0
hsa-miR-1178-3p	NM_001270727	BCL2L13	..(((((((.....(((((((&.)))))))))))))).	4363	4389	0.923077	-19.6	1	6.12661e-08	0.426	-0.170824	-0.207425	-14.5171	14	16	14	3UTR		0	0
hsa-miR-1178-3p	NM_001270728	BCL2L13	(((((..(.((((((((((..&)))))))))).)..))))).	3756	3776	0.846154	-19.7	1	4.30661e-05	0.471	-0.127047	-0.366925	-8.43861	16	20	10	3UTR		0	0
hsa-miR-1178-3p	NM_001270728	BCL2L13	..(((((((.....(((((((&.)))))))))))))).	4170	4196	0.846154	-19.6	1	6.12661e-08	0.426	0.144946	-0.077439	-14.5171	14	16	14	3UTR		0	0
hsa-miR-1178-3p	NM_001270729	BCL2L13	(((((..(.((((((((((..&)))))))))).)..))))).	3934	3954	0.846154	-19.7	1	4.30661e-05	0.471	-0.127047	-0.366925	-8.43861	16	20	10	3UTR		0	0
hsa-miR-1178-3p	NM_001270729	BCL2L13	..(((((((.....(((((((&.)))))))))))))).	4348	4374	0.846154	-19.6	1	6.12661e-08	0.426	0.144946	-0.077439	-14.5171	14	16	14	3UTR		0	0
hsa-miR-1178-3p	NM_001270731	BCL2L13	(((((..(.((((((((((..&)))))))))).)..))))).	4021	4041	0.846154	-19.7	1	4.30661e-05	0.471	-0.127047	-0.366925	-8.43861	16	20	10	3UTR		0	0
hsa-miR-1178-3p	NM_001270731	BCL2L13	..(((((((.....(((((((&.)))))))))))))).	4435	4461	0.846154	-19.6	1	6.12661e-08	0.426	0.144946	-0.077439	-14.5171	14	16	14	3UTR		0	0
hsa-miR-1178-3p	NM_001270732	BCL2L13	(((((..(.((((((((((..&)))))))))).)..))))).	3864	3884	0.846154	-19.7	1	4.30661e-05	0.471	-0.127047	-0.366925	-8.43861	16	20	10	3UTR		0	0
hsa-miR-1178-3p	NM_001270732	BCL2L13	..(((((((.....(((((((&.)))))))))))))).	4278	4304	0.846154	-19.6	1	6.12661e-08	0.426	0.144946	-0.077439	-14.5171	14	16	14	3UTR		0	0
hsa-miR-1178-3p	NM_001270734	BCL2L13	(((((..(.((((((((((..&)))))))))).)..))))).	3877	3897	0.846154	-19.7	1	4.30661e-05	0.471	-0.127047	-0.366925	-8.43861	16	20	10	3UTR		0	0
hsa-miR-1178-3p	NM_001270734	BCL2L13	..(((((((.....(((((((&.)))))))))))))).	4291	4317	0.846154	-19.6	1	6.12661e-08	0.426	0.144946	-0.077439	-14.5171	14	16	14	3UTR		0	0
hsa-miR-1178-3p	NM_001270735	BCL2L13	(((((..(.((((((((((..&)))))))))).)..))))).	3720	3740	0.846154	-19.7	1	4.30661e-05	0.471	-0.127047	-0.366925	-8.43861	16	20	10	3UTR		0	0
hsa-miR-1178-3p	NM_001270735	BCL2L13	..(((((((.....(((((((&.)))))))))))))).	4134	4160	0.846154	-19.6	1	6.12661e-08	0.426	0.144946	-0.077439	-14.5171	14	16	14	3UTR		0	0
hsa-miR-1178-3p	NM_001270768	STRIP1	...(((((((((((((((.((&)))))))))......)))))))).	2376	2400	0.846154	-22.2	1	0.000527057	0.456	6.27793	2.60078	-6.51454	17	24	9	CDS		0	0
hsa-miR-1178-3p	NM_001270768	STRIP1	(((((((((.(((((((((..&)))))))))..))....))))))).	1369	1394	0.846154	-21.7	1	0.136463	0.441	5.46175	3.58916	-5.18008	18	25	9	CDS		0	0
hsa-miR-1178-3p	NM_001270771	SORBS2	..((((.((.(((((((((..&)).))))))).)).)))).	1497	1516	0.846154	-21.3	1	0.000589614	0.353	2.7432	0.892532	-7.74319	15	19	7	CDS		0	0
hsa-miR-1178-3p	NM_001270781	GZMH	((((((.((((((((((((((&))))))).............))))))))))))).	291	325	0.923077	-22.4	1	0.00659683	0.456	-0.962028	0.584237	-5.48126	20	34	13	CDS		0	0
hsa-miR-1178-3p	NM_001270781	GZMH	...((((((((((.(((((..&))))).))))))).))).	620	638	0.846154	-19.4	1	4.19466e-06	0.441	-0.0119125	-0.0981285	-7.37138	15	18	7	3UTR		0	0
hsa-miR-1178-3p	NM_001270782	TFAM	.(((.((((.(((((((((..&))))))))).))).).))).	4122	4142	0.846154	-20.2	1	0.100424	0.691	0.0272836	0.0952597	-9.15487	16	20	9	3UTR		0	0
hsa-miR-1178-3p	NM_001270837	CRIP2	(((((((((((((((((((..&)))))).))........))))))))))).	1081	1110	0.923077	-22.8	1	3.76156e-07	0.382	2.57606	1.95162	-3.93757	19	29	11	CDS		0	0
hsa-miR-1178-3p	NM_001270837	CRIP2	.((((((((((((((((((((&))))))))))))...................)))..))))).	585	627	0.846154	-22.5	1	3.74527e-05	0.338	2.80917	0.980347	-3.79332	20	42	12	CDS		0	0
hsa-miR-1178-3p	NM_001270837	CRIP2	..((((((((((...((((..&))))...)))))))))).	189	207	0.846154	-22	1	4.63922e-05	0.353	-0.282581	-1.2294	-7.83842	14	18	10	5UTR		0	0
hsa-miR-1178-3p	NM_001270837	CRIP2	.(((((.((((((((((((..&)).)))))))))).))))).	380	400	0.923077	-22	1	0.00038119	0.338	-0.122017	0.0113766	-5.33701	17	20	10	CDS		0	0
hsa-miR-1178-3p	NM_001270841	CRIP2	(((((((((((((((((((..&.)))))).))........))))))))))).	224	264	0.923077	-23.1	1	3.76156e-07	0.382	2.63524	2.48835	-3.93757	19	30	11	CDS		0	0
hsa-miR-1178-3p	NM_001270841	CRIP2	((((((.((((((((((((((&)))).))))))))))....)))))).	427	453	0.846154	-21.9	1	3.53716e-05	0.324	-0.413139	-0.700023	-5.48126	20	26	10	3UTR		0	0
hsa-miR-1178-3p	NM_001270875	MEAF6	..(((((((((.(((((((..&.))).))))...))))))))).	2571	2597	0.923077	-23.1	1	6.595e-05	0.412	-0.872373	0.455616	-8.3038	16	22	9	3UTR		0	0
hsa-miR-1178-3p	NM_001270875	MEAF6	...((((((.(((((.(((((&))))).))))).)))))).	2284	2303	0.846154	-20.8	1	1.6845e-09	0.485	0.0240593	-0.07717	-7.9901	16	19	6	3UTR		0	0
hsa-miR-1178-3p	NM_001270876	MEAF6	..(((((((((.(((((((..&.))).))))...))))))))).	2244	2270	0.923077	-23.1	1	6.595e-05	0.412	-0.412317	-0.138821	-8.3038	16	22	9	3UTR		0	0
hsa-miR-1178-3p	NM_001270876	MEAF6	...((((((.(((((.(((((&))))).))))).)))))).	1957	1976	0.846154	-20.8	1	1.6845e-09	0.485	-0.016534	0.034746	-7.9901	16	19	6	3UTR		0	0
hsa-miR-1178-3p	NM_001270880	GNPDA2	.(((((.(((((((((.((((&)))).)))).............)))))))))).	602	635	0.846154	-16.9	1	0.00115941	0.574	1.14388	1.31549	-5.33701	18	33	10	CDS		0	0
hsa-miR-1178-3p	NM_001270888	SLC25A10	..((.(((((((((((((.((&.))))))))))))))).)).	1881	1931	0.923077	-26.3	1	2.10195e-06	0.382	-1.65576	-1.01481	-9.07604	17	20	15	3UTR		0	0
hsa-miR-1178-3p	NM_001270894	TRAPPC3	...((((((.(((((((((..&))))))))).)).)))).	1077	1095	0.923077	-21.4	1	0.0483725	0.397	5.86378	4.81036	-7.75705	15	18	9	3UTR		0	0
hsa-miR-1178-3p	NM_001270895	TRAPPC3	...((((((.(((((((((..&))))))))).)).)))).	1074	1092	0.923077	-21.4	1	0.0483725	0.397	5.80975	5.91138	-7.75705	15	18	9	3UTR		0	0
hsa-miR-1178-3p	NM_001270896	TRAPPC3	...((((((.(((((((((..&))))))))).)).)))).	1298	1316	1	-21.4	1	0.0483725	0.397	-0.0437822	0.121445	-7.75705	15	18	9	3UTR		0	0
hsa-miR-1178-3p	NM_001270896	TRAPPC3	..(((..(.(((((((((((.&))))))))))).)..))).	1321	1340	1	-19.7	1	0.00168056	0.456	0.101741	0.654148	-9.45804	15	19	11	3UTR		0	0
hsa-miR-1178-3p	NM_001270897	TRAPPC3	...((((((.(((((((((..&))))))))).)).)))).	855	873	0.923077	-21.4	1	0.0483725	0.397	5.33398	5.93811	-7.75705	15	18	9	3UTR		0	0
hsa-miR-1178-3p	NM_001270897	TRAPPC3	..((((.((((....(((((.&)))))....)))).)))).	305	324	0.846154	-18.7	1	0.00100365	0.471	0.852239	0.770853	-12.7289	13	19	5	CDS		0	0
hsa-miR-1178-3p	NM_001270930	IFIT1	..(((..((((((((((((..&)))..)))))))))..))).	1007	1027	0.923077	-20.3	1	0.00241024	0.529	-0.117135	0.554083	-8.40165	15	20	9	CDS		0	0
hsa-miR-1178-3p	NM_001270930	IFIT1	..((.((((((.(((((((..&)).)))))..)))))))).	2720	2739	0.846154	-19	1	2.23515e-05	0.382	-0.0593207	-0.0326265	-12.4228	15	19	8	3UTR		0	0
hsa-miR-1178-3p	NM_001270930	IFIT1	(((((((((((((((.(((..&)))..)))))))))...)))))).	350	374	0.807692	-18.3	1	0.0138694	0.574	-0.200635	-0.240578	-4.17062	18	24	9	5UTR		0	0
hsa-miR-1178-3p	NM_001270934	JAKMIP2	.(((((.((((((((((.(((&.))).)))))))))).))))).	2609	2653	1	-23.8	1	0.00302179	0.529	-0.142437	-0.0238261	-5.33701	18	22	10	CDS		0	0
hsa-miR-1178-3p	NM_001270934	JAKMIP2	.((((((((.(...(((((((&))))))).....).)))))))).	962	985	0.923077	-22.6	1	0.00656387	0.485	0.191364	0.672402	-10.5286	16	23	8	CDS		0	0
hsa-miR-1178-3p	NM_001270934	JAKMIP2	.(((((.(((((((((((((.&)))))))...)))).)).))))).	3764	3788	0.846154	-20.1	1	0.00714748	0.574	0.10637	-0.15675	-5.33701	18	24	7	3UTR		0	0
hsa-miR-1178-3p	NM_001270938	ZNF551	..(((((((((.(((((((..&.)).)))))..))))))))).	3497	3537	0.923077	-24.6	1	0.000793594	0.426	0.205456	0.00182275	-8.3038	16	21	9	3UTR		0	0
hsa-miR-1178-3p	NM_001270940	XPO6	..(((((((((((((((((((&.)))))))))))))).))))).	352	387	1	-25.5	1	6.54842e-05	0.397	0.168091	0.59219	-4.957	19	22	14	5UTR		0	0
hsa-miR-1178-3p	NM_001270941	JAKMIP2	.(((((.((((((((((.(((&.))).)))))))))).))))).	2672	2716	1	-23.8	1	0.00302179	0.529	0.152248	-0.112232	-5.33701	18	22	10	CDS		0	0
hsa-miR-1178-3p	NM_001270941	JAKMIP2	.((((((((.(...(((((((&))))))).....).)))))))).	962	985	0.923077	-22.6	1	0.00656387	0.485	0.191364	0.672402	-10.5286	16	23	8	CDS		0	0
hsa-miR-1178-3p	NM_001270941	JAKMIP2	.(((((.(((((((((((((.&)))))))...)))).)).))))).	3827	3851	0.846154	-20.1	1	0.00714748	0.574	-0.131503	0.0487441	-5.33701	18	24	7	3UTR		0	0
hsa-miR-1178-3p	NM_001270942	KLF7	(((((((((.(((((((((..&))))))))....).))))))))).	6161	6185	0.923077	-23.9	1	4.35561e-05	0.412	3.30324	3.40336	-5.18008	18	24	9	3UTR		0	0
hsa-miR-1178-3p	NM_001270942	KLF7	..((((((.(((((((((...&))))))))))))))).	793	809	0.980769	-22.2	1	0.000143273	0.485	-0.38674	0.15143	-6.01339	15	16	15	CDS		0	0
hsa-miR-1178-3p	NM_001270942	KLF7	((((((.((((((((((((((&))))).))))))))).)))))).	7534	7557	1	-20.4	1	0.154106	0.485	3.74037	2.57059	-5.48126	20	23	9	3UTR		0	0
hsa-miR-1178-3p	NM_001270943	KLF7	..((((((.(((((((((...&))))))))))))))).	762	778	1	-22.2	1	0.000172885	0.485	-0.107607	0.0785759	-6.01339	15	16	15	CDS		0	0
hsa-miR-1178-3p	NM_001270943	KLF7	((((((.((((((((((((((&))))).))))))))).)))))).	7503	7526	0.884615	-20.4	1	0.154106	0.485	4.23173	4.34954	-5.48126	20	23	9	3UTR		0	0
hsa-miR-1178-3p	NM_001270944	KLF7	(((((((((.(((((((((..&))))))))....).))))))))).	6094	6118	0.846154	-23.9	1	4.35561e-05	0.412	3.70424	3.09425	-5.18008	18	24	9	3UTR		0	0
hsa-miR-1178-3p	NM_001270944	KLF7	..((((((.(((((((((...&))))))))))))))).	726	742	1	-22.2	1	0.000172885	0.485	0.171527	0.442846	-6.01339	15	16	15	CDS		0	0
hsa-miR-1178-3p	NM_001270944	KLF7	((((((.((((((((((((((&))))).))))))))).)))))).	7467	7490	0.923077	-20.4	1	0.154106	0.485	3.07033	3.41819	-5.48126	20	23	9	3UTR		0	0
hsa-miR-1178-3p	NM_001270949	TNFRSF11A	.(((((((((((...(((((.&.))).))....))))))))))).	5413	5443	1	-21.1	1	0.000137576	0.353	0	0	-6.67474	16	23	11	3UTR		0	0
hsa-miR-1178-3p	NM_001270949	TNFRSF11A	((((((((((.((((((((..&)).))))))..............)))))))))).	5583	5617	0.846154	-20.4	1	2.67273e-05	0.456	0	0	-6.76235	18	34	10	3UTR		0	0
hsa-miR-1178-3p	NM_001270950	TNFRSF11A	.(((((((((((...(((((.&.))).))....))))))))))).	5360	5390	1	-21.1	1	0.000137576	0.353	0	0	-6.67474	16	23	11	3UTR		0	0
hsa-miR-1178-3p	NM_001270950	TNFRSF11A	((((((((((.((((((((..&)).))))))..............)))))))))).	5530	5564	0.846154	-20.4	1	2.67273e-05	0.456	0	0	-6.76235	18	34	10	3UTR		0	0
hsa-miR-1178-3p	NM_001270951	TNFRSF11A	.(((((((((((...(((((.&.))).))....))))))))))).	5246	5276	0.923077	-21.1	1	0.000137576	0.353	0.236161	0.0173322	-6.67474	16	23	11	3UTR		0	0
hsa-miR-1178-3p	NM_001270953	SLC25A10	..((.(((((((((((((.((&.))))))))))))))).)).	1771	1821	0.923077	-26.3	1	2.10195e-06	0.382	-1.77402	-1.04844	-9.07604	17	20	15	3UTR		0	0
hsa-miR-1178-3p	NM_001270965	PSD	((((((((((((..(((((..&)))))..)))))))))))).	3259	3279	1	-23.6	1	0.000633559	0.324	1.23278	1.34465	-6.08354	17	20	12	CDS		0	0
hsa-miR-1178-3p	NM_001270966	PSD	((((((((((((..(((((..&)))))..)))))))))))).	2762	2782	0.923077	-23.6	1	0.000633559	0.324	4.94028	3.96545	-6.08354	17	20	12	CDS		0	0
hsa-miR-1178-3p	NM_001270974	HYDIN	((((((.((.(((((((((..&)).))))))).)).)))))).	7166	7187	0.923077	-22.9	1	0.0576941	0.426	2.07513	3.16846	-6.72377	17	21	7	CDS		0	0
hsa-miR-1178-3p	NM_001270974	HYDIN	..(((((((((((((((((..&))))))))))..)))))..)).	3273	3295	0.923077	-22.5	1	4.12912e-05	0.441	0.083641	-0.146433	-4.957	17	22	10	CDS		0	0
hsa-miR-1178-3p	NM_001270974	HYDIN	.((((((.((((((((((((.&))))).)))))))..)))))).	6530	6552	0.846154	-22.8	1	0.0035725	0.456	1.80997	3.42772	-6.10696	18	22	7	CDS		0	0
hsa-miR-1178-3p	NM_001270975	IST1	...((((((((((((((((((&.))).))))))).................)))))))).	1486	1532	0.846154	-21.3	1	4.3402e-05	0.426	0.243998	0.185667	-6.51454	18	38	8	3UTR		0	0
hsa-miR-1178-3p	NM_001270975	IST1	(((((.(((.(((((((((..&)).))))))).))).))))).	3861	3882	0.923077	-19.8	1	0.171878	0.603	0.375511	0.134652	-7.08104	17	21	7	3UTR		0	0
hsa-miR-1178-3p	NM_001270976	IST1	...((((((((((((((((((&.))).))))))).................)))))))).	1639	1685	0.846154	-21.3	1	4.3402e-05	0.426	0.243998	0.185667	-6.51454	18	38	8	3UTR		0	0
hsa-miR-1178-3p	NM_001270976	IST1	.((((((((((((((((....&)))))))))).............................)))))).	211	257	0.846154	-19.9	1	0.0167904	0.574	4.11051	2.61642	-3.79332	16	46	10	CDS		0	0
hsa-miR-1178-3p	NM_001270977	IST1	...((((((((((((((((((&.))).))))))).................)))))))).	1393	1439	0.846154	-21.3	1	4.3402e-05	0.426	0.243998	0.185667	-6.51454	18	38	8	3UTR		0	0
hsa-miR-1178-3p	NM_001270977	IST1	(((((.(((.(((((((((..&)).))))))).))).))))).	3768	3789	0.923077	-19.8	1	0.171878	0.603	0.375511	0.134652	-7.08104	17	21	7	3UTR		0	0
hsa-miR-1178-3p	NM_001270978	IST1	...((((((((((((((((((&.))).))))))).................)))))))).	1114	1160	0.846154	-21.3	1	4.3402e-05	0.426	0.243998	0.185667	-6.51454	18	38	8	3UTR		0	0
hsa-miR-1178-3p	NM_001270978	IST1	(((((.(((.(((((((((..&)).))))))).))).))))).	3489	3510	0.923077	-19.8	1	0.171878	0.603	0.375511	0.134652	-7.08104	17	21	7	3UTR		0	0
hsa-miR-1178-3p	NM_001270979	IST1	...((((((((((((((((((&.))).))))))).................)))))))).	1068	1114	0.846154	-21.3	1	4.3402e-05	0.426	0.243998	0.185667	-6.51454	18	38	8	3UTR		0	0
hsa-miR-1178-3p	NM_001270979	IST1	(((((.(((.(((((((((..&)).))))))).))).))))).	3443	3464	0.923077	-19.8	1	0.171878	0.603	0.375511	0.134652	-7.08104	17	21	7	3UTR		0	0
hsa-miR-1178-3p	NM_001270987	LTBR	.((((((((((((((......&)))))))).)))))).	1787	1803	0.923077	-18.4	1	0.000696631	0.382	0.310509	-0.0623622	-4.02637	14	16	8	3UTR		0	0
hsa-miR-1178-3p	NM_001270989	EPGN	..((((((((.((((......&.)))).)))))))).	553	578	1	-18.3	1	0.0768772	0.662	0.286425	0.614992	-8.01482	12	15	8	3UTR		0	0
hsa-miR-1178-3p	NM_001270990	EPGN	..((((((((.((((......&.)))).)))))))).	427	452	1	-18.3	1	0.0768772	0.662	0.286425	0.614992	-8.01482	12	15	8	3UTR		0	0
hsa-miR-1178-3p	NM_001270991	EPGN	..((((((((.((((......&.)))).)))))))).	400	425	1	-18.3	1	0.0768772	0.662	0.286425	0.614992	-8.01482	12	15	8	3UTR		0	0
hsa-miR-1178-3p	NM_001270992	EPGN	..((((((((.((((......&.)))).)))))))).	400	425	1	-18.3	1	0.0768772	0.662	0.286425	0.614992	-8.01482	12	15	8	3UTR		0	0
hsa-miR-1178-3p	NM_001270993	EPGN	..((((((((.((((......&.)))).)))))))).	373	398	1	-18.3	1	0.0768772	0.662	0.286425	0.614992	-8.01482	12	15	8	3UTR		0	0
hsa-miR-1178-3p	NM_001270999	ZFAND2B	..((.(.((((((((((((..&))))))))))))).)).	21	38	0.923077	-22.6	1	1.48471e-05	0.119	1.19168	0.320841	-10.6197	15	17	13	5UTR		0	0
hsa-miR-1178-3p	NM_001271	CHD2	..(((((((.((((((((...&))))))))))))))).	8161	8177	1	-23.8	1	0.000423774	0.397	-0.224	-0.105183	-6.19951	15	16	15	3UTR		0	0
hsa-miR-1178-3p	NM_001271	CHD2	((((((((((((((((((((.&)))))))).)))))............))))))).	5540	5574	0.923077	-23.8	1	0.00836747	0.441	3.9907	4.16012	-3.93757	20	34	8	CDS		0	0
hsa-miR-1178-3p	NM_001271006	CENPX	(((((((((((((((((....&.))))).))).))))))))).	33	68	0.846154	-22.3	1	2.03654e-08	0.397	1.49378	0.816155	-3.93757	17	21	9	CDS		0	0
hsa-miR-1178-3p	NM_001271007	CENPX	(((((((((((((((((....&.))))).))).))))))))).	33	68	0.846154	-22.3	1	4.46624e-08	0.397	1.49378	0.816155	-3.93757	17	21	9	CDS		0	0
hsa-miR-1178-3p	NM_001271022	ATRIP	..((((.((((((((((((((&))))))))))..)))))))).	1415	1436	1	-25.4	1	4.87247e-05	0.456	1.21863	1.74141	-6.50069	18	21	10	CDS		0	0
hsa-miR-1178-3p	NM_001271022	ATRIP	...(((((((((((((((((.&))))))))))).......)))))).	2849	2874	0.846154	-22.6	1	0.0711611	0.324	0	0	-6.51454	17	25	11	3UTR		0	0
hsa-miR-1178-3p	NM_001271022	ATRIP	..((.((((.(((((((((..&))))))))))))))).	2595	2611	0.923077	-20.3	1	0.00552269	0.441	0	0	-10.3185	15	16	15	3UTR		0	0
hsa-miR-1178-3p	NM_001271023	ATRIP	..((((.((((((((((((((&))))))))))..)))))))).	1666	1687	1	-25.4	1	4.87247e-05	0.456	0.758781	0.853172	-6.50069	18	21	10	CDS		0	0
hsa-miR-1178-3p	NM_001271023	ATRIP	...(((((((((((((((((.&))))))))))).......)))))).	3100	3125	0.846154	-22.6	1	0.0711611	0.324	-0.0600578	0.0273764	-6.51454	17	25	11	3UTR		0	0
hsa-miR-1178-3p	NM_001271023	ATRIP	..((.((((.(((((((((..&))))))))))))))).	2846	2862	0.923077	-20.3	1	0.00552269	0.441	-0.14646	0.698221	-10.3185	15	16	15	3UTR		0	0
hsa-miR-1178-3p	NM_001271035	FCGR3B	((((((((((..(((((((..&.)))))))...)))))))))).	1026	1055	1	-24.8	1	0.000147472	0.515	-0.228468	-0.107008	-10.1092	17	22	10	3UTR		0	0
hsa-miR-1178-3p	NM_001271035	FCGR3B	((((.(((((((((((((((.&)))))).....))))))))))))).	855	880	0.923077	-24.1	1	0.00510873	0.485	-0.181683	-0.0368307	-8.05661	19	25	13	3UTR		0	0
hsa-miR-1178-3p	NM_001271036	FCGR3B	((((((((((..(((((((..&.)))))))...)))))))))).	1181	1210	1	-24.8	1	0.000147472	0.515	-0.0125382	-0.080916	-10.1092	17	22	10	3UTR		0	0
hsa-miR-1178-3p	NM_001271036	FCGR3B	((((.(((((((((((((((.&)))))).....))))))))))))).	1010	1035	0.923077	-24.1	1	0.00510873	0.485	-0.00893982	-0.096211	-8.05661	19	25	13	3UTR		0	0
hsa-miR-1178-3p	NM_001271036	FCGR3B	...((((((((((((((((((&))))))).....))))..))))))).	1442	1468	0.846154	-20.6	1	0.00963338	0.515	0.255095	0.117041	-6.51454	18	26	7	3UTR		0	0
hsa-miR-1178-3p	NM_001271037	FCGR3B	((((((((((..(((((((..&.)))))))...)))))))))).	923	952	1	-24.8	1	0.000147472	0.515	-0.250061	-0.116904	-10.1092	17	22	10	3UTR		0	0
hsa-miR-1178-3p	NM_001271037	FCGR3B	((((.(((((((((((((((.&)))))).....))))))))))))).	752	777	0.923077	-24.1	1	0.00510873	0.485	0.314954	0.0423434	-8.05661	19	25	13	3UTR		0	0
hsa-miR-1178-3p	NM_001271037	FCGR3B	...((((((((((((((((((&))))))).....))))..))))))).	1184	1210	0.846154	-20.6	1	0.00963338	0.515	0.108382	-0.0872137	-6.51454	18	26	7	3UTR		0	0
hsa-miR-1178-3p	NM_001271043	NFIX	..(((((((((((((((((..&))))))))))))........................))))).	2189	2231	0.923077	-23.4	1	4.31105e-05	0.309	-0.409349	-0.280332	-4.957	17	42	12	3UTR		0	0
hsa-miR-1178-3p	NM_001271043	NFIX	.((((((((.(((((((((..&))))))))).)).)))))).	3013	3033	0.923077	-22.8	1	0.000317615	0.324	1.6773	0.900836	-5.03583	17	20	9	3UTR		0	0
hsa-miR-1178-3p	NM_001271044	NFIX	..(((((((((((((((((..&))))))))))))........................))))).	2000	2042	0.923077	-23.4	1	4.31105e-05	0.309	-0.409349	-0.280332	-4.957	17	42	12	3UTR		0	0
hsa-miR-1178-3p	NM_001271044	NFIX	.((((((((.(((((((((..&))))))))).)).)))))).	2824	2844	0.923077	-22.8	1	0.000317615	0.324	1.6773	0.900836	-5.03583	17	20	9	3UTR		0	0
hsa-miR-1178-3p	NM_001271052	ADGRE2	..(((((..(((((((((...&)))))))))..))))).	16	33	0.923077	-21.1	1	1.9222e-12	0.29	0.0198732	0.368283	-8.32703	14	17	9	5UTR		0	0
hsa-miR-1178-3p	NM_001271052	ADGRE2	..((((((((((((.((((((&)))).))...)))))).)))))).	5676	5700	0.846154	-19.3	1	0.000966585	0.485	-0.0753807	-0.0302795	-5.69245	18	24	6	3UTR		0	0
hsa-miR-1178-3p	NM_001271082	NKD2	..((((.(((((..((((...&))))..))))))))).	386	402	1	-19.9	1	0.00109675	0.279	-0.419298	1.23634	-8.64666	13	16	9	CDS		0	0
hsa-miR-1178-3p	NM_001271097	PUF60	(((((((((((((((((((((&)))))))...)))))).....)))))))).	456	486	0.846154	-24.5	1	0.000791404	0.368	5.23768	5.23737	-3.93757	21	30	8	CDS		0	0
hsa-miR-1178-3p	NM_001271099	PUF60	(((((((((((((((((((((&)))))))...)))))).....)))))))).	507	537	0.846154	-24.5	1	0.000791404	0.368	5.38677	4.69367	-3.93757	21	30	8	CDS		0	0
hsa-miR-1178-3p	NM_001271100	PUF60	(((((((((((((((((((((&)))))))...)))))).....)))))))).	565	595	0.923077	-24.5	1	0.000791404	0.368	3.65009	4.40222	-3.93757	21	30	8	CDS		0	0
hsa-miR-1178-3p	NM_001271145	ST3GAL6	(((((.(((((((((((((..&.)))))))))))))))))).	2905	2941	1	-25.7	1	0.0325371	0.632	-0.676491	-0.198428	-5.83853	18	20	18	3UTR		0	0
hsa-miR-1178-3p	NM_001271145	ST3GAL6	((((((.(((((((((((...&))))))))).))..)))))).	3217	3238	1	-22.7	1	0.0156207	0.353	0.0733203	0.0275654	-5.48126	17	21	9	3UTR		0	0
hsa-miR-1178-3p	NM_001271146	ST3GAL6	(((((.(((((((((((((..&.)))))))))))))))))).	2865	2901	1	-25.7	1	0.0325371	0.632	-0.251805	-0.227246	-5.83853	18	20	18	3UTR		0	0
hsa-miR-1178-3p	NM_001271146	ST3GAL6	((((((.(((((((((((...&))))))))).))..)))))).	3177	3198	0.923077	-22.7	1	0.0156207	0.353	-0.164302	0.00178104	-5.48126	17	21	9	3UTR		0	0
hsa-miR-1178-3p	NM_001271147	ST3GAL6	(((((.(((((((((((((..&.)))))))))))))))))).	2839	2875	1	-25.7	1	0.0325371	0.632	-0.251805	-0.227246	-5.83853	18	20	18	3UTR		0	0
hsa-miR-1178-3p	NM_001271147	ST3GAL6	((((((.(((((((((((...&))))))))).))..)))))).	3151	3172	0.923077	-22.7	1	0.0156207	0.353	-0.164302	0.00178104	-5.48126	17	21	9	3UTR		0	0
hsa-miR-1178-3p	NM_001271156	ZFP41	(((((((((((.(((((((..&))))))).))...))))))))).	594	617	0.897436	-22.2	1	0.00512022	0.382	-0.540844	-0.556892	-7.28438	18	23	9	5UTR		0	0
hsa-miR-1178-3p	NM_001271161	PGR	(((((((((((((((.(((..&))).)))))))...)))))))).	10070	10093	0.807692	-21.8	1	0.000383139	0.485	5.3762	5.4999	-4.17062	18	23	8	3UTR		0	0
hsa-miR-1178-3p	NM_001271162	PGR	(((((((((((((((.(((..&))).)))))))...)))))))).	9132	9155	1	-21.8	1	0.000383139	0.485	0.0661648	0.531219	-4.17062	18	23	8	3UTR		0	0
hsa-miR-1178-3p	NM_001271164	PTGS1	((((((((((((..((((((.&))))))...)))))))))))).	3124	3146	1	-24.9	1	0.00296498	0.529	0.0673909	0.0381229	-6.08354	18	22	12	3UTR		0	0
hsa-miR-1178-3p	NM_001271164	PTGS1	.(.((((..((((((((((..&))))))))))..)))).).	4301	4320	1	-21.8	1	0.0349293	0.412	0.236529	-0.0808258	-8.72089	15	19	10	3UTR		0	0
hsa-miR-1178-3p	NM_001271164	PTGS1	..(((..((((((((((....&))))))))))..))).	4226	4242	0.846154	-21.6	1	0.00766848	0.368	-0.0722498	-0.026504	-8.40165	13	16	10	3UTR		0	0
hsa-miR-1178-3p	NM_001271165	PTGS1	((((((((((((..((((((.&))))))...)))))))))))).	3256	3278	1	-24.9	1	0.00296498	0.529	0.0673909	0.0381229	-6.08354	18	22	12	3UTR		0	0
hsa-miR-1178-3p	NM_001271165	PTGS1	.(.((((..((((((((((..&))))))))))..)))).).	4433	4452	1	-21.8	1	0.0349293	0.412	0.236529	-0.0808258	-8.72089	15	19	10	3UTR		0	0
hsa-miR-1178-3p	NM_001271165	PTGS1	..(((..((((((((((....&))))))))))..))).	4358	4374	0.846154	-21.6	1	0.00766848	0.368	-0.0722498	-0.026504	-8.40165	13	16	10	3UTR		0	0
hsa-miR-1178-3p	NM_001271166	PTGS1	((((((((((((..((((((.&))))))...)))))))))))).	3399	3421	1	-24.9	1	0.00296498	0.529	0.0673909	0.0381229	-6.08354	18	22	12	3UTR		0	0
hsa-miR-1178-3p	NM_001271166	PTGS1	.(.((((..((((((((((..&))))))))))..)))).).	4576	4595	1	-21.8	1	0.0349293	0.412	0.236529	-0.0808258	-8.72089	15	19	10	3UTR		0	0
hsa-miR-1178-3p	NM_001271166	PTGS1	..(((..((((((((((....&))))))))))..))).	4501	4517	0.846154	-21.6	1	0.00766848	0.368	-0.0722498	-0.026504	-8.40165	13	16	10	3UTR		0	0
hsa-miR-1178-3p	NM_001271168	PCED1A	(((.(((((((((((((....&)))))))))..))))))).	1648	1667	0.846154	-18.1	1	0.0479012	0.564	0	0	-6.9696	16	19	9	3UTR		0	0
hsa-miR-1178-3p	NM_001271183	TRO	((((.((((.((((((((((.&))))))..)))).)))))))).	69	91	0.846154	-19.8	1	0.0189675	0.441	1.02604	0.326553	-9.29912	18	22	8	5UTR		0	0
hsa-miR-1178-3p	NM_001271184	TRO	((((.((((.((((((((((.&))))))..)))).)))))))).	230	252	0.846154	-19.8	1	0.0426592	0.441	0.742408	0.579162	-9.29912	18	22	8	CDS		0	0
hsa-miR-1178-3p	NM_001271186	RAP2C	(((((.(((.(((((((((((&)))))))..)))).))).))))).	847	871	0.846154	-21.6	1	0.00298992	0.485	2.08733	1.58992	-7.08104	19	24	7	CDS		0	0
hsa-miR-1178-3p	NM_001271197	CLEC18A	..((.(((((..(((((((..&)))))))..))))).)).	1076	1094	0.923077	-21.5	1	1.0818e-07	0.397	2.95542	3.05984	-15.2476	14	18	7	CDS		0	0
hsa-miR-1178-3p	NM_001271197	CLEC18A	..(((((((.((((((((...&)))))))).))))...................))).	1038	1074	0.923077	-19.5	1	0.00483623	0.338	2.95179	2.98847	-6.19951	15	36	8	CDS		0	0
hsa-miR-1178-3p	NM_001271208	NEB	..(((((((((((..((....&.)).))))))))))).	18738	18773	1	-21.6	1	0.000721576	0.574	1.69054	2.56294	-6.54929	13	16	11	CDS		0	0
hsa-miR-1178-3p	NM_001271208	NEB	..(((...(((((((((((((&))))).)))))))).))).	1883	1902	1	-19.5	1	0.0386826	0.632	4.84509	3.44695	-10.7153	16	19	8	CDS		0	0
hsa-miR-1178-3p	NM_001271208	NEB	..(((...(((((((((((((&))))).)))))))).))).	2624	2643	1	-19.5	1	0.0495054	0.603	4.00524	5.01945	-10.7153	16	19	8	CDS		0	0
hsa-miR-1178-3p	NM_001271213	SQOR	((((.((((((((((.(((((&.))))).)))))))))))))).	331	358	0.846154	-24.1	1	0.00027416	0.397	4.54825	3.35402	-8.28966	19	22	14	CDS		0	0
hsa-miR-1178-3p	NM_001271213	SQOR	((((.(((((.((((((((((&)))))))))).)))......)).)))).	1494	1522	0.846154	-22.1	1	2.02236e-05	0.515	6.04271	3.80521	-10.8814	19	28	10	CDS		0	0
hsa-miR-1178-3p	NM_001271223	OBSCN	((((((((((.(((((((...&))))))))))))))))).	9680	9698	1	-28.1	1	0.00288606	0.324	1.14579	2.28753	-6.76235	17	18	17	CDS		0	0
hsa-miR-1178-3p	NM_001271223	OBSCN	((((.(((((.((((((((((&)))))))))))))))..)))).	8600	8622	0.846154	-26.7	1	0.0197759	0.324	2.62672	2.17954	-10.8814	19	22	15	CDS		0	0
hsa-miR-1178-3p	NM_001271282	DICER1	((((((((((((((.((((..&)))).)))))))....))))))).	4038	4062	0.846154	-20.6	1	0.016534	0.5	6.44484	3.58753	-4.67302	18	24	7	CDS		0	0
hsa-miR-1178-3p	NM_001271282	DICER1	..(((((((((((((((((..&))))))))........))))).............)))).	427	466	0.846154	-19.2	1	0.00127528	0.559	1.08395	0.874165	-4.957	17	39	8	CDS		0	0
hsa-miR-1178-3p	NM_001271286	ZNF512	((.(((.(((((((((((((.&)))))))))).)))..))).)).	1551	1574	0.923077	-22.8	1	0.0118804	0.5	1.0611	1.72814	-7.0388	18	23	10	CDS		0	0
hsa-miR-1178-3p	NM_001271286	ZNF512	(((((((((((((((((((..&)))))))))........................)))))))))).	3228	3272	0.923077	-21.4	1	0.000341898	0.603	0.23966	1.14001	-3.93757	19	44	10	3UTR		0	0
hsa-miR-1178-3p	NM_001271287	ZNF512	((.(((.(((((((((((((.&)))))))))).)))..))).)).	1579	1602	0.923077	-22.8	1	0.0118804	0.5	1.0611	1.72814	-7.0388	18	23	10	CDS		0	0
hsa-miR-1178-3p	NM_001271287	ZNF512	(((((((((((((((((((..&)))))))))........................)))))))))).	3256	3300	0.923077	-21.4	1	0.000341898	0.603	0.23966	1.14001	-3.93757	19	44	10	3UTR		0	0
hsa-miR-1178-3p	NM_001271318	ZNF512	((.(((.(((((((((((((.&)))))))))).)))..))).)).	1739	1762	0.923077	-22.8	1	0.0118804	0.5	1.0611	1.72814	-7.0388	18	23	10	CDS		0	0
hsa-miR-1178-3p	NM_001271318	ZNF512	(((((((((((((((((((..&)))))))))........................)))))))))).	3416	3460	0.923077	-21.4	1	0.000341898	0.603	0.23966	1.14001	-3.93757	19	44	10	3UTR		0	0
hsa-miR-1178-3p	NM_001271329	MARVELD3	(((((((((((.(((((((((&.))))).....))))..))))))))))).	1736	1788	0.846154	-25.8	1	1.62388e-05	0.441	0.0290338	0.0341506	-7.28438	20	29	11	3UTR		0	0
hsa-miR-1178-3p	NM_001271329	MARVELD3	(((((((((...((((((...&))))))....))))))))).	1299	1319	1	-22	1	8.64426e-06	0.412	-0.404213	-0.50157	-11.3517	15	20	9	3UTR		0	0
hsa-miR-1178-3p	NM_001271368	PTGS1	((((((((((((..((((((.&))))))...)))))))))))).	3621	3643	1	-24.9	1	0.00296498	0.529	0.0673909	0.0381229	-6.08354	18	22	12	3UTR		0	0
hsa-miR-1178-3p	NM_001271368	PTGS1	.(.((((..((((((((((..&))))))))))..)))).).	4798	4817	1	-21.8	1	0.0349293	0.412	0.236529	-0.0808258	-8.72089	15	19	10	3UTR		0	0
hsa-miR-1178-3p	NM_001271368	PTGS1	..(((..((((((((((....&))))))))))..))).	4723	4739	0.846154	-21.6	1	0.00766848	0.368	-0.0722498	-0.026504	-8.40165	13	16	10	3UTR		0	0
hsa-miR-1178-3p	NM_001271427	EMC1	.((((((((((((((((((..&.))))))..).))))))))))).	2137	2166	1	-25.5	1	0.000873238	0.397	0.160421	-0.0157161	-3.79332	18	23	11	CDS		0	0
hsa-miR-1178-3p	NM_001271427	EMC1	..(((((((((.(((((((((&))))).....))))..))))))))).	5511	5537	1	-23	1	2.62963e-07	0.412	3.06949	2.03596	-8.3038	18	26	9	3UTR		0	0
hsa-miR-1178-3p	NM_001271427	EMC1	((((((((((((.((((((((&))))))))..))))))))..)))).	994	1019	1	-22.7	1	0.00181093	0.456	0.266037	-0.00431839	-5.22671	20	25	8	CDS		0	0
hsa-miR-1178-3p	NM_001271429	EMC1	.((((((((((((((((((..&.))))))..).))))))))))).	2074	2103	1	-25.5	1	0.000873238	0.397	-0.321817	0.0705657	-3.79332	18	23	11	CDS		0	0
hsa-miR-1178-3p	NM_001271429	EMC1	..(((((((((.(((((((((&))))).....))))..))))))))).	5448	5474	1	-23	1	2.62963e-07	0.412	2.38543	3.15309	-8.3038	18	26	9	3UTR		0	0
hsa-miR-1178-3p	NM_001271429	EMC1	((((((((((((.((((((((&))))))))..))))))))..)))).	928	953	1	-22.7	1	0.00180397	0.441	0.348452	0.0496098	-5.22671	20	25	8	CDS		0	0
hsa-miR-1178-3p	NM_001271440	CFAP410	.(((((...(..(((((((((&)))))))))..)...))))).	1647	1668	0.923077	-22.4	1	0.000455389	0.456	4.09339	3.0061	-14.8786	15	21	9	3UTR		0	0
hsa-miR-1178-3p	NM_001271441	CFAP410	.(((((...(..(((((((((&)))))))))..)...))))).	2007	2028	0.923077	-22.4	1	0.000455389	0.456	4.09339	3.0061	-14.8786	15	21	9	3UTR		0	0
hsa-miR-1178-3p	NM_001271441	CFAP410	..((((..((((((((((((.&)))))))).))))..)))).	932	952	0.923077	-22.1	1	0.000200055	0.309	-0.00390531	-0.538227	-8.81432	16	20	8	CDS		0	0
hsa-miR-1178-3p	NM_001271471	LRTOMT	.(((.((((((.(((((((..&)))..)))).))))))))).	1231	1251	0.846154	-19.1	1	1.72617e-05	0.412	0.16326	-0.0103411	-11.2592	16	20	9	3UTR		0	0
hsa-miR-1178-3p	NM_001271507	CCDC177	((((((.(((((((((((...&)))))))..................)))))))))).	1700	1736	0.846154	-21.8	1	0.000145083	0.397	2.8924	2.02942	-5.48126	17	36	10	CDS		0	0
hsa-miR-1178-3p	NM_001271507	CCDC177	..((((.(((((.((((((..&)))))).))))).)))).	268	286	0.846154	-21.8	1	5.44697e-05	0.324	0.665145	0.341063	-7.78982	15	18	6	5UTR		0	0
hsa-miR-1178-3p	NM_001271512	ACBD5	..((((..(.(((((((((..&))))))))).)..)))).	260	278	0.846154	-21.4	1	0.00479243	0.324	1.28003	0.816461	-10.0568	14	18	9	5UTR		0	0
hsa-miR-1178-3p	NM_001271518	KCNMA1	.((((((((.(((((((((..&)))))))).....).)))))))).	10720	10744	0.846154	-22.9	1	9.12021e-05	0.412	5.26262	6.89207	-5.03583	17	24	8	3UTR		0	0
hsa-miR-1178-3p	NM_001271518	KCNMA1	.(((((((((..(((((((..&)).)))))))))))))).	10113	10131	0.923077	-20	1	0.00687182	0.544	6.92798	6.47017	-9.9649	16	18	14	3UTR		0	0
hsa-miR-1178-3p	NM_001271519	KCNMA1	..((((((((((((((.....&))))).....))))))))).	5151	5171	0.923077	-18.9	1	0.0125219	0.647	6.46578	6.28412	-4.957	14	20	9	3UTR		0	0
hsa-miR-1178-3p	NM_001271520	KCNMA1	((((((((((((((.((((..&))))...)).....)))))))))))).	684	711	0.846154	-20.2	1	1.00893e-08	0.324	0.100243	0.0761281	-4.67302	18	27	12	CDS		0	0
hsa-miR-1178-3p	NM_001271522	KCNMA1	..((((.((..((((((((..&)))))))))))))).	1127	1142	1	-17.8	1	1.49891e-05	0.515	0.503418	0.298326	-10.568	14	15	14	3UTR		0	0
hsa-miR-1178-3p	NM_001271539	SEL1L2	((((((.((((((((......&)))))))))))))).	1444	1459	0.923077	-16.1	1	0.0246887	0.574	2.05577	2.28383	-5.71431	14	15	14	CDS		0	0
hsa-miR-1178-3p	NM_001271572	PEX11A	..((((..(((((((((((..&)))))))))))....)))).	935	955	0.980769	-20.6	1	0.028323	0.515	-0.379969	-0.0255638	-8.81432	15	20	11	3UTR		0	1
hsa-miR-1178-3p	NM_001271572	PEX11A	((((((((((((((((.....&))))..))))))))).))).	1462	1482	0.846154	-18.2	1	0.0365928	0.559	-0.716556	-0.268811	-3.93757	16	20	9	3UTR		0	1
hsa-miR-1178-3p	NM_001271581	DNAJC10	..((((.(((((((((((((.&.)))))...)))))))).)))).	19712	19744	0.923077	-23.5	1	0.0029724	0.471	-0.229529	0.0747874	-6.50069	17	23	8	3UTR		0	0
hsa-miR-1178-3p	NM_001271592	SMIM10L1	......((((((((((((((.&)))))))))))))).	1355	1370	1	-23.3	0	0.17094	0.603	0.35048	0.137848	-15.5666	14	15	14	3UTR		0	0
hsa-miR-1178-3p	NM_001271592	SMIM10L1	((((((.(((((((((((((.&))))...)))))))).).)))))).	4002	4027	0.923077	-18.7	1	0.445311	0.515	-0.746797	0.151667	-5.48126	19	25	8	3UTR		0	0
hsa-miR-1178-3p	NM_001271593	PPME1	..(((((((.(((((((....&)))))))))))))).	918	933	1	-18.7	1	0.0387933	0.603	4.01501	3.63185	-6.19951	14	15	14	CDS		0	0
hsa-miR-1178-3p	NM_001271593	PPME1	..(((((((((((((.(((..&))).))))))))))......))).	2344	2368	0.846154	-17.4	1	0.000553151	0.471	1.11595	1.13186	-5.19005	16	24	10	3UTR		0	0
hsa-miR-1178-3p	NM_001271594	SESN3	(((((...(((((((((((..&)))))))))))))))).	2861	2878	0.923077	-18.8	1	0.00736105	0.647	1.96449	1.61724	-9.69585	16	17	16	3UTR		0	0
hsa-miR-1178-3p	NM_001271594	SESN3	.((((((((..((((((((..&))))))))...))..................)))))).	883	921	0.846154	-18.4	1	0.00860597	0.588	2.42634	3.29992	-7.86061	16	38	8	CDS		0	0
hsa-miR-1178-3p	NM_001271606	BASP1	..(((((((.((((((.....&)))))).))))))).	194	209	0.846154	-20.7	1	0.000709929	0.25	2.92793	3.13875	-6.19951	13	15	7	CDS		0	0
hsa-miR-1178-3p	NM_001271606	BASP1	...((((((.(((((((((..&)))))))))...)))))).	969	988	0.871795	-20.3	1	0.00047913	0.529	3.68832	3.48616	-7.75705	15	19	9	3UTR		0	0
hsa-miR-1178-3p	NM_001271606	BASP1	(((((....((((((((((..&))))))))))..))))).	495	513	0.923077	-20.3	1	0.000161817	0.309	0.958738	2.46378	-10.7522	15	18	10	CDS		0	0
hsa-miR-1178-3p	NM_001271608	LASP1	..(((((((((((((((....&.))))))))))))))).	2966	2991	0.923077	-20	1	0.0108728	0.441	-0.693046	-0.306588	-4.957	15	17	15	3UTR		0	0
hsa-miR-1178-3p	NM_001271608	LASP1	((((((.((((((((((((..&))))))))))))...)).)))).	2992	3015	0.923077	-24.1	1	0.000330056	0.485	-0.431118	-0.530287	-5.48126	18	23	12	3UTR		0	0
hsa-miR-1178-3p	NM_001271608	LASP1	((((((...((((((((((..&)))))))))).....)))))).	2055	2077	0.846154	-22.1	1	1.73378e-05	0.485	0.0397495	-0.417487	-8.85129	16	22	10	3UTR		0	0
hsa-miR-1178-3p	NM_001271608	LASP1	..((.(.(((.((((((((((&)))))))))))))))).	1080	1097	1	-20.6	1	4.332e-07	0.324	0.632914	0.57726	-13.4445	16	17	16	3UTR		0	0
hsa-miR-1178-3p	NM_001271620	ZNF423	.(.(((((((((((((((((.&))))))))).....)))))))).).	6436	6461	0.923077	-23.7	1	4.93376e-05	0.353	3.36484	3.39936	-5.35086	18	25	9	3UTR		0	0
hsa-miR-1178-3p	NM_001271620	ZNF423	.(.((((((((((((((((((&))))))...)))))))))).)).).	6506	6531	0.884615	-21.1	1	0.0183687	0.5	4.40032	4.47058	-5.35086	19	25	10	3UTR		0	0
hsa-miR-1178-3p	NM_001271629	MEF2D	..(((((((((((((((((..&))))))))))))..))))).	5478	5498	0.923077	-25.2	1	0.000344375	0.338	1.2154	3.05722	-4.957	17	20	12	3UTR		0	0
hsa-miR-1178-3p	NM_001271629	MEF2D	(((((((((((((((......&.))))))))))))))).	4994	5028	0.923077	-22.5	1	6.12055e-08	0.368	4.07585	4.34042	-4.17062	15	17	15	3UTR		0	0
hsa-miR-1178-3p	NM_001271634	CNOT9	((((((((((.((((((((..&))))))))))))).....))))).	1448	1472	0.923077	-22.7	1	0.00446691	0.397	0.0939903	1.2013	-6.76235	18	24	13	3UTR		0	0
hsa-miR-1178-3p	NM_001271634	CNOT9	.((((((((((((((((((..&))))))))))))..)))))).	3123	3144	0.923077	-22.1	1	0.00988759	0.515	0.840633	1.18165	-3.79332	18	21	12	3UTR		0	0
hsa-miR-1178-3p	NM_001271634	CNOT9	((((((.(((((((.((....&)).))))))))))))).	3770	3787	1	-21.2	1	4.55672e-05	0.441	0.331253	0.00626369	-6.21671	15	17	13	3UTR		0	0
hsa-miR-1178-3p	NM_001271637	ZNF138	(((((((((((((........&.)))))))).))))).	1557	1591	0.846154	-17.6	1	0.000149544	0.588	0.267387	-1.71387	-5.76291	13	16	8	3UTR		0	0
hsa-miR-1178-3p	NM_001271637	ZNF138	((.(((((.(((((((.((((&)))).))))))).........))))).)).	1049	1079	0.846154	-17.1	1	0.00350486	0.662	0.513314	-1.78058	-6.5515	18	30	7	3UTR		0	0
hsa-miR-1178-3p	NM_001271638	ZNF138	(((((((((((((........&.)))))))).))))).	1564	1598	0.846154	-17.6	1	0.000149544	0.588	0.267387	-1.71387	-5.76291	13	16	8	3UTR		0	0
hsa-miR-1178-3p	NM_001271638	ZNF138	((.(((((.(((((((.((((&)))).))))))).........))))).)).	1056	1086	0.846154	-17.1	1	0.00350486	0.662	0.513314	-1.78058	-6.5515	18	30	7	CDS		0	0
hsa-miR-1178-3p	NM_001271639	ZNF138	(((((((((((((........&.)))))))).))))).	1553	1587	0.846154	-17.6	1	0.000149544	0.588	0.267387	-1.71387	-5.76291	13	16	8	3UTR		0	0
hsa-miR-1178-3p	NM_001271639	ZNF138	((.(((((.(((((((.((((&)))).))))))).........))))).)).	1045	1075	0.846154	-17.1	1	0.00350486	0.662	0.513314	-1.78058	-6.5515	18	30	7	CDS		0	0
hsa-miR-1178-3p	NM_001271640	ZNF138	(((((((((((((........&)))))))).))))).	1631	1646	0.846154	-17.6	1	0.000149544	0.588	-0.421212	-1.12426	-5.76291	13	15	8	3UTR		0	0
hsa-miR-1178-3p	NM_001271640	ZNF138	((.(((((.(((((((.((((&)))).))))))).........))))).)).	1104	1134	0.846154	-17.1	1	0.00350486	0.662	0.513314	-1.78058	-6.5515	18	30	7	3UTR		0	0
hsa-miR-1178-3p	NM_001271641	MTCH1	.((((((((((...((((((.&.))))))..)))))))))).	955	991	0.846154	-26.2	1	0.00236109	0.456	3.39969	4.24239	-9.2861	16	20	10	CDS		0	0
hsa-miR-1178-3p	NM_001271641	MTCH1	((((((.((((((..(((((.&)))))..)))))))))))).	1350	1370	0.846154	-21.6	1	0.00104843	0.338	3.07965	3.72555	-7.07355	17	20	12	3UTR		0	0
hsa-miR-1178-3p	NM_001271643	THADA	....(((((((((((((....&))))))...))))))).	2386	2403	0.923077	-16.6	1	0.000525446	0.647	2.97094	2.14702	-9.54656	13	17	7	CDS		0	0
hsa-miR-1178-3p	NM_001271644	THADA	....(((((((((((((....&))))))...))))))).	2102	2119	0.923077	-16.6	1	0.000525446	0.647	1.74724	2.01877	-9.54656	13	17	7	CDS		0	0
hsa-miR-1178-3p	NM_001271649	ZNF138	(((((((((((((........&.)))))))).))))).	1348	1382	0.846154	-17.6	1	0.000149544	0.588	0.267387	-1.71387	-5.76291	13	16	8	3UTR		0	0
hsa-miR-1178-3p	NM_001271649	ZNF138	((.(((((.(((((((.((((&)))).))))))).........))))).)).	840	870	0.846154	-17.1	1	0.00350486	0.662	0.513314	-1.78058	-6.5515	18	30	7	CDS		0	0
hsa-miR-1178-3p	NM_001271661	SEMA4F	..(((((((((.(((((((..&))).))))...))))))))).	4112	4133	0.923077	-22.6	1	5.60013e-06	0.382	-0.0248816	-0.00267982	-8.3038	16	21	9	3UTR		0	0
hsa-miR-1178-3p	NM_001271661	SEMA4F	((.((((((.(((((((((..&))))))))))))))).)).	4482	4501	1	-22.3	1	0.0024502	0.382	0.403656	0.117213	-6.73762	17	19	15	3UTR		0	0
hsa-miR-1178-3p	NM_001271661	SEMA4F	.(((((..(((((((((((((&))))))).))))))..))))).	2279	2301	0.846154	-21.2	1	0.00219481	0.471	0.167956	0.227805	-7.65065	18	22	7	3UTR		0	0
hsa-miR-1178-3p	NM_001271662	SEMA4F	..(((((((((((((((((((&))))))).................)))))))))))).	616	653	0.923077	-25.8	1	0.000426375	0.412	2.37639	2.25754	-4.957	19	37	12	CDS		0	0
hsa-miR-1178-3p	NM_001271662	SEMA4F	..(((((((((.(((((((..&))).))))...))))))))).	4478	4499	0.923077	-22.6	1	5.60013e-06	0.382	0.189387	0.0442622	-8.3038	16	21	9	3UTR		0	0
hsa-miR-1178-3p	NM_001271662	SEMA4F	((.((((((.(((((((((..&))))))))))))))).)).	4848	4867	1	-22.3	1	0.0024502	0.382	0.268329	0.14893	-6.73762	17	19	15	3UTR		0	0
hsa-miR-1178-3p	NM_001271665	NSA2	((((((..(((((((((((..&)))))......))))))...)))))).	2383	2410	0.846154	-19.1	1	0.114821	0.647	0.59076	0.726319	-7.7949	17	27	6	3UTR		0	0
hsa-miR-1178-3p	NM_001271668	DTNBP1	((((((((...((((((....&)))))).....)))))))).	512	532	0.923077	-18.3	1	0.000619884	0.574	6.24883	4.99519	-9.06125	14	20	8	CDS		0	0
hsa-miR-1178-3p	NM_001271668	DTNBP1	.(.(((((((....((((...&))))...))))))).).	1030	1047	0.846154	-17.8	1	6.73378e-05	0.353	3.85153	2.90407	-13.6684	12	17	7	CDS		0	0
hsa-miR-1178-3p	NM_001271669	DTNBP1	((((((((...((((((....&)))))).....)))))))).	458	478	0.923077	-18.3	1	0.000619884	0.574	5.42164	4.05201	-9.06125	14	20	8	CDS		0	0
hsa-miR-1178-3p	NM_001271681	PYCR2	(((((((((..(((((((...&.))))).))))))))))).	1300	1319	0.876923	-21.2	1	0.0211973	0.647	5.10176	1.87759	-8.00486	16	19	11	3UTR		0	1
hsa-miR-1178-3p	NM_001271684	SLC35A3	..(((((((((.(((((((..&.)).)))))..))))))))).	2900	2933	1	-24.2	1	0.00123935	0.441	0.0667198	-0.0337064	-8.3038	16	21	9	3UTR		0	0
hsa-miR-1178-3p	NM_001271684	SLC35A3	...((((((((...(((((((&))))).)).)))))))).	2413	2431	0.923077	-19.1	1	0.00337082	0.574	0.0711161	0.136824	-12.0073	15	18	8	3UTR		0	0
hsa-miR-1178-3p	NM_001271685	SLC35A3	..(((((((((.(((((((..&.)).)))))..))))))))).	3114	3147	1	-24.2	1	0.00123935	0.441	0.0667198	-0.0337064	-8.3038	16	21	9	3UTR		0	0
hsa-miR-1178-3p	NM_001271685	SLC35A3	...((((((((...(((((((&))))).)).)))))))).	2627	2645	0.923077	-19.1	1	0.00337082	0.574	0.0711161	0.136824	-12.0073	15	18	8	3UTR		0	0
hsa-miR-1178-3p	NM_001271686	RAB3IL1	..((((.(((((((((((...&))))......))))))))))).	543	565	0.846154	-21.1	1	1.86773e-06	0.368	-0.699977	-0.139608	-6.50069	15	22	11	CDS		0	0
hsa-miR-1178-3p	NM_001271686	RAB3IL1	((((((((.((((((((((..&)))..))))))))))))))).	510	531	0.923077	-20.2	1	0.0129214	0.441	0.467787	-0.420975	-4.99396	18	21	15	CDS		0	0
hsa-miR-1178-3p	NM_001271696	ABCB7	.((((((((.(...(((((((&))))))).).)))))))).	4544	4563	0.846154	-20.8	1	2.80462e-06	0.574	0.430596	1.44828	-10.5286	16	19	8	3UTR		0	0
hsa-miR-1178-3p	NM_001271696	ABCB7	(((((((((((.(((((((..&)))..)))).))))))).)))).	3198	3221	0.846154	-19.9	1	2.04201e-05	0.353	4.2573	4.82038	-7.28438	18	23	7	3UTR		0	0
hsa-miR-1178-3p	NM_001271696	ABCB7	((((.((((((.(((((.(((&))).))))).....)))))))))).	1734	1759	0.923077	-18.6	1	0.000481749	0.559	0.0324043	0.11605	-11.4034	18	25	10	CDS		0	0
hsa-miR-1178-3p	NM_001271697	ABCB7	.((((((((.(...(((((((&))))))).).)))))))).	4424	4443	0.846154	-20.8	1	2.80462e-06	0.574	0.430596	1.44828	-10.5286	16	19	8	3UTR		0	0
hsa-miR-1178-3p	NM_001271697	ABCB7	(((((((((((.(((((((..&)))..)))).))))))).)))).	3078	3101	0.846154	-19.9	1	2.04201e-05	0.353	5.59425	5.15603	-7.28438	18	23	7	3UTR		0	0
hsa-miR-1178-3p	NM_001271697	ABCB7	((((.((((((.(((((.(((&))).))))).....)))))))))).	1614	1639	0.923077	-18.6	1	0.000481749	0.559	-0.335014	0.0509208	-11.4034	18	25	10	CDS		0	0
hsa-miR-1178-3p	NM_001271698	ABCB7	.((((((((.(...(((((((&))))))).).)))))))).	4466	4485	0.846154	-20.8	1	2.80462e-06	0.574	0.430596	1.44828	-10.5286	16	19	8	3UTR		0	0
hsa-miR-1178-3p	NM_001271698	ABCB7	(((((((((((.(((((((..&)))..)))).))))))).)))).	3120	3143	0.846154	-19.9	1	2.04201e-05	0.353	4.10592	4.92719	-7.28438	18	23	7	3UTR		0	0
hsa-miR-1178-3p	NM_001271698	ABCB7	((((.((((((.(((((.(((&))).))))).....)))))))))).	1656	1681	0.923077	-18.6	1	0.000481749	0.559	0.329837	0.0417353	-11.4034	18	25	10	CDS		0	0
hsa-miR-1178-3p	NM_001271699	ABCB7	.((((((((.(...(((((((&))))))).).)))))))).	4427	4446	0.846154	-20.8	1	2.80462e-06	0.574	0.430596	1.44828	-10.5286	16	19	8	3UTR		0	0
hsa-miR-1178-3p	NM_001271699	ABCB7	(((((((((((.(((((((..&)))..)))).))))))).)))).	3081	3104	0.846154	-19.9	1	2.04201e-05	0.353	5.8184	5.18993	-7.28438	18	23	7	3UTR		0	0
hsa-miR-1178-3p	NM_001271699	ABCB7	((((.((((((.(((((.(((&))).))))).....)))))))))).	1617	1642	0.923077	-18.6	1	0.000481749	0.559	-0.171717	0.0806641	-11.4034	18	25	10	CDS		0	0
hsa-miR-1178-3p	NM_001271702	ANXA8	((((((((...((.(((((..&.))))).)).)))))))).	786	812	0.923077	-20.8	1	0.00115677	0.382	-0.238862	-0.11063	-9.91808	15	19	8	CDS		0	1
hsa-miR-1178-3p	NM_001271702	ANXA8	((((((..(((((((((((..&)))....)))))))).)))))).	1279	1302	1	-19.1	1	0.265228	0.426	2.4709	2.15251	-7.7949	17	23	8	CDS		0	1
hsa-miR-1178-3p	NM_001271703	ANXA8	((((((((...((.(((((..&.))))).)).)))))))).	486	512	0.923077	-20.8	1	0.00115677	0.382	-0.227205	-0.240028	-9.91808	15	19	8	CDS		0	1
hsa-miR-1178-3p	NM_001271703	ANXA8	((((((..(((((((((((..&)))....)))))))).)))))).	979	1002	1	-19.1	1	0.265228	0.426	2.23215	2.13787	-7.7949	17	23	8	CDS		0	1
hsa-miR-1178-3p	NM_001271706	IZUMO3	...(((((((.(((((((((.&.)))))))))))).)))).	666	697	0.953846	-20.7	1	0.279029	0.647	0.771811	1.2446	-9.33931	16	19	12	CDS		0	0
hsa-miR-1178-3p	NM_001271706	IZUMO3	....(((((.((.((((((..&)))))).)).))))).	4	20	0.846154	-16.4	1	0.0511205	0.449	0	0	-12.0782	13	16	6	5UTR		0	0
hsa-miR-1178-3p	NM_001271707	MKRN2	.(((((((.((.(((((....&))))).)).))))))).	121	138	0.846154	-20.1	1	3.1743e-09	0.324	0.343257	1.11529	-8.19652	14	17	7	CDS		0	0
hsa-miR-1178-3p	NM_001271711	SLC2A8	..(((((((.(((((((((..&)).)))))))..))))))).	1618	1638	1	-21	1	1.22135e-05	0.441	0.187186	-0.336624	-6.19951	16	20	7	3UTR		0	0
hsa-miR-1178-3p	NM_001271712	SLC2A8	..(((((((.(((((((((..&)).)))))))..))))))).	1394	1414	1	-21	1	1.22135e-05	0.441	0.187186	-0.336624	-6.19951	16	20	7	3UTR		0	0
hsa-miR-1178-3p	NM_001271732	YIPF5	..(((((((((.(((((((..&))).))))...))))))))).	1638	1659	0.923077	-22.6	1	1.02809e-05	0.397	0.0864455	-0.177735	-8.3038	16	21	9	3UTR		0	0
hsa-miR-1178-3p	NM_001271732	YIPF5	..((((((((.(((..(((((&)))))....)))...)))))))).	1048	1072	0.923077	-18.9	1	0.000548564	0.603	0.412294	0.812033	-8.75027	16	24	8	3UTR		0	0
hsa-miR-1178-3p	NM_001271741	CSNK1A1	..(((((((((.(((((....&.)))))..))))))))).	5119	5166	0.923077	-23	1	2.16771e-06	0.397	0.949597	0.733545	-8.3038	14	18	9	3UTR		0	0
hsa-miR-1178-3p	NM_001271742	CSNK1A1	..(((((((((.(((((....&)))))..))))))))).	4855	4872	0.923077	-23	1	2.16771e-06	0.397	1.21187	3.03285	-8.3038	14	17	9	3UTR		0	0
hsa-miR-1178-3p	NM_001271749	C5AR2	..((((((((((((((((...&)))))).......)))))))))).	1671	1695	0.846154	-24.4	1	0.000851556	0.412	-0.866121	-0.6175	-4.957	16	24	10	3UTR		0	0
hsa-miR-1178-3p	NM_001271749	C5AR2	..(((((((((.(((((((((&))))).....))))..))))))))).	3660	3686	0.923077	-23	1	2.5557e-07	0.426	0.202089	-0.104881	-8.3038	18	26	9	3UTR		0	0
hsa-miR-1178-3p	NM_001271754	ITGBL1	.(((((((..((((((((...&))))))))..))))))).	859	877	0.846154	-26.2	1	0.00436412	0.426	4.32888	4.23169	-6.09222	15	18	8	CDS		0	0
hsa-miR-1178-3p	NM_001271755	ITGBL1	.(((((((..((((((((...&.))))))))..))))))).	911	948	0.846154	-26.2	1	0.00436412	0.426	4.25401	5.44256	-6.09222	15	19	8	CDS		0	0
hsa-miR-1178-3p	NM_001271756	ITGBL1	.(((((((..((((((((...&))))))))..))))))).	705	723	0.846154	-26.2	1	0.00436412	0.426	3.45921	3.78521	-6.09222	15	18	8	CDS		0	0
hsa-miR-1178-3p	NM_001271762	DUS2	..((((.((((((((((((..&.)))))))))))))))).	430	470	1	-25.3	1	1.33345e-06	0.5	4.81541	4.54722	-6.50069	16	18	16	CDS		0	0
hsa-miR-1178-3p	NM_001271763	DUS2	..((((.(((((((((((...&))))))))))))))).	429	445	0.846154	-23.9	1	6.05678e-07	0.441	5.89874	3.54509	-6.50069	15	16	15	CDS		0	0
hsa-miR-1178-3p	NM_001271769	AP3B1	.(.(((((((((((((((((.&.)))))))))....................)))))))).).	2242	2288	1	-23.8	1	0.00407043	0.412	3.4765	3.43652	-5.35086	18	41	9	CDS		0	0
hsa-miR-1178-3p	NM_001271774	RALGDS	..(((((((.(((((((((((&)))).))))))).))...........))))).	2498	2530	0.846154	-20.5	1	0.000959482	0.426	0.122775	0.24345	-6.19951	18	32	7	CDS		0	0
hsa-miR-1178-3p	NM_001271783	FAR2	(((((((((((((((((((..&))).))))))))))....................)))))).	2572	2613	0.923077	-19.3	1	0.00287093	0.618	0.0268624	0.0854551	-3.93757	19	41	10	3UTR		0	0
hsa-miR-1178-3p	NM_001271783	FAR2	((((((((((((.(((((.((&)).))))).)))))))).)))).	794	817	0.833333	-18.8	1	0.000623039	0.485	3.45721	4.1693	-5.22671	19	23	8	CDS		0	0
hsa-miR-1178-3p	NM_001271783	FAR2	(((((((..((((((((....&)))))))).....))))))).	3209	3230	0.923077	-18.8	1	0.00671387	0.603	0.154622	-0.00291339	-7.3076	15	21	8	3UTR		0	0
hsa-miR-1178-3p	NM_001271784	FAR2	(((((((((((((((((((..&))).))))))))))....................)))))).	2444	2485	0.923077	-19.3	1	0.00287093	0.618	0.0268624	0.0854551	-3.93757	19	41	10	3UTR		0	0
hsa-miR-1178-3p	NM_001271784	FAR2	((((((((((((.(((((.((&)).))))).)))))))).)))).	666	689	0.833333	-18.8	1	0.000623039	0.485	3.45721	4.1693	-5.22671	19	23	8	CDS		0	0
hsa-miR-1178-3p	NM_001271784	FAR2	(((((((..((((((((....&)))))))).....))))))).	3081	3102	0.923077	-18.8	1	0.00671387	0.603	0.154622	-0.00291339	-7.3076	15	21	8	3UTR		0	0
hsa-miR-1178-3p	NM_001271803	REEP2	.(.((((.((((((((((...&)))))))))).)))).).	1373	1391	0.923077	-20.4	1	0.000233296	0.309	0.166582	-0.0780984	-7.6645	15	18	10	3UTR		0	0
hsa-miR-1178-3p	NM_001271805	PFKFB1	..(((((((((((((......&))))).)))))))).	408	423	1	-18.2	1	0.00203375	0.588	4.87702	4.26776	-5.19005	13	15	8	CDS		0	0
hsa-miR-1178-3p	NM_001271807	TREML1	..(((((((....((((((((&))))))))))))).)).	1081	1098	0.923077	-18.4	1	0.00112295	0.559	1.31016	0.856169	-13.6602	15	17	13	3UTR		0	0
hsa-miR-1178-3p	NM_001271808	TREML1	..(((((((....((((((((&))))))))))))).)).	801	818	0.923077	-18.4	1	0.00112295	0.559	0.619459	0.775564	-13.6602	15	17	13	3UTR		0	0
hsa-miR-1178-3p	NM_001271814	PLA2G2D	.(((((((.(((((((((((.&))))...))))))).))))))).	2046	2069	0.923077	-22.6	1	4.91127e-05	0.515	0	0	-4.84971	18	23	7	3UTR		0	0
hsa-miR-1178-3p	NM_001271816	DCLRE1A	(((((((((((((((((((((&))))....)))..))))))))))....)))).	108	140	1	-19.3	1	0.000516262	0.574	0.253252	0.0934536	-3.93757	21	32	10	5UTR		0	0
hsa-miR-1178-3p	NM_001271818	ORAI2	...((((((((((.(((((..&)))))..)))))))))).	10698	10716	1	-24.3	1	0.000540644	0.544	-0.432149	-0.208122	-7.37138	15	18	10	3UTR		0	0
hsa-miR-1178-3p	NM_001271818	ORAI2	..(((((((.((((((((((.&)))))))..))).))))))).	4716	4737	0.923077	-24.6	1	0.00120847	0.382	-0.473987	-0.0611274	-6.19951	17	21	7	3UTR		0	0
hsa-miR-1178-3p	NM_001271818	ORAI2	..(((((((((.(((((((..&)).)))))..))))))))).	5074	5094	1	-23.6	1	1.12962e-05	0.338	-0.348249	-0.106439	-8.3038	16	20	9	3UTR		0	0
hsa-miR-1178-3p	NM_001271821	TREM2	..((((..(((((((((((((&))))))))))...)))..)))).	19	42	0.923077	-22.3	1	3.65307e-05	0.412	0.783102	-0.085043	-8.81432	17	23	10	5UTR		0	0
hsa-miR-1178-3p	NM_001271825	SERPINB6	((((((((((((((((.....&)))))))))..))))))).	184	203	0.923077	-20.4	1	5.3825e-07	0.485	3.34055	1.15442	-3.93757	16	19	9	5UTR		0	0
hsa-miR-1178-3p	NM_001271826	PUS7L	..(((((((((.(((((((..&.)).)))))..))))))))).	6104	6148	0.846154	-23.9	1	3.43921e-06	0.397	-0.51438	0.0168394	-8.3038	16	21	9	3UTR		0	0
hsa-miR-1178-3p	NM_001271826	PUS7L	.((((...(((((((((((((&)))))))))))))...)))).	2183	2204	0.923077	-19.7	1	0.0160383	0.588	0.397116	0.0579514	-9.55161	17	21	13	3UTR		0	0
hsa-miR-1178-3p	NM_001271828	PRELID1	.(((((((((((..((((...&)))).)))))))).))).	181	199	0.846154	-15.7	1	0.00844422	0.353	4.93739	2.26218	-5.9393	15	18	8	5UTR		0	0
hsa-miR-1178-3p	NM_001271832	PTPA	..(((((((.(((((((((..&.))).)))))).))))))).	94	127	0.923077	-23.3	1	0.105099	0.368	1.43135	0.290725	-6.19951	16	20	7	5UTR		0	0
hsa-miR-1178-3p	NM_001271833	DENND2D	((((((.((.(((((((....&))))))).)))))))).	485	502	1	-20.2	1	0.00103532	0.412	0.416255	0.126621	-6.72377	15	17	8	CDS		0	0
hsa-miR-1178-3p	NM_001271833	DENND2D	.((((((((....(((((...&)))))..)))))))).	537	553	0.846154	-19.2	1	1.85307e-07	0.441	-0.118134	0.225983	-12.4965	13	16	8	CDS		0	0
hsa-miR-1178-3p	NM_001271835	CCDC120	..((((((((((((.((((..&)))).....)))))))))))).	3224	3246	0.923077	-23	1	5.59101e-07	0.338	0	0	-5.69245	16	22	12	3UTR		0	0
hsa-miR-1178-3p	NM_001271835	CCDC120	......(((((((((((((((&)))).))))))))))).	2677	2694	0.846154	-20.3	0	1.6212e-06	0.382	0	0	-15.5666	15	17	11	3UTR		0	0
hsa-miR-1178-3p	NM_001271836	CCDC120	..((((((((((((.((((..&)))).....)))))))))))).	3436	3458	1	-23	1	5.59101e-07	0.338	0.287379	0.478387	-5.69245	16	22	12	3UTR		0	0
hsa-miR-1178-3p	NM_001271836	CCDC120	......(((((((((((((((&)))).))))))))))).	2889	2906	0.923077	-20.3	0	1.6212e-06	0.382	2.63829	2.61467	-15.5666	15	17	11	3UTR		0	0
hsa-miR-1178-3p	NM_001271837	RCN2	..(((((((((...(((....&)))...))))))))).	3298	3314	0.923077	-18.5	1	4.59913e-05	0.618	0.0712518	0.237956	-10.4498	12	16	9	3UTR		0	0
hsa-miR-1178-3p	NM_001271838	RSRC1	((.((((((((((((((((..&))))))))))).....................))))).)).	595	636	0.846154	-21.4	1	0.123155	0.603	2.31719	3.67914	-5.49511	18	41	11	CDS		0	0
hsa-miR-1178-3p	NM_001271840	IKZF5	..((((((((((....(((..&)))....)))))))))).	1293	1311	0.923077	-18.8	1	0.00598194	0.441	0.0707307	-0.0455631	-8.07147	13	18	10	CDS		0	0
hsa-miR-1178-3p	NM_001271840	IKZF5	((((.((((((((((((((..&)))))...))))))).)))))).	437	460	0.846154	-18.4	1	0.00869749	0.515	1.41945	1.57209	-8.05661	18	23	7	CDS		0	0
hsa-miR-1178-3p	NM_001271840	IKZF5	...((((((((((((((....&))))))))))...)))).	239	257	0.923077	-18.2	1	0.0802658	0.618	1.90037	1.57133	-6.51454	14	18	10	5UTR		0	0
hsa-miR-1178-3p	NM_001271842	SCIMP	..(((((((((.(((((((..&.)).)))))..))))))))).	2093	2119	1	-23.2	1	8.44427e-05	0.412	2.42878	0.754719	-8.3038	16	21	9	3UTR		0	0
hsa-miR-1178-3p	NM_001271842	SCIMP	(((((((((...((((((.((&)).))))))....))))))))).	1926	1949	0.923077	-21.7	1	5.5246e-07	0.426	0.879289	0.650884	-11.3517	17	23	9	3UTR		0	0
hsa-miR-1178-3p	NM_001271842	SCIMP	..((((...(((((((((...&)))))))))....)))).	784	802	0.923077	-20.4	1	0.000308374	0.426	-0.22262	-0.186619	-9.87071	13	18	9	3UTR		0	0
hsa-miR-1178-3p	NM_001271844	TBC1D16	..(((((((((((((((((((&.)))))......)))))))))))))).	7446	7490	0.923077	-28.1	1	3.69265e-06	0.338	-0.540179	-0.27975	-4.957	19	27	14	3UTR		0	0
hsa-miR-1178-3p	NM_001271844	TBC1D16	.(((((.((((((((((((((&)))))))))...)))))))))).	8286	8309	0.923077	-25.9	1	0.00342544	0.353	-0.381282	-0.416477	-5.33701	19	23	10	3UTR		0	0
hsa-miR-1178-3p	NM_001271845	TBC1D16	..(((((((((((((((((((&.)))))......)))))))))))))).	7485	7529	0.846154	-28.1	1	3.69265e-06	0.338	-0.404153	-0.459326	-4.957	19	27	14	3UTR		0	0
hsa-miR-1178-3p	NM_001271845	TBC1D16	.(((((.((((((((((((((&)))))))))...)))))))))).	8325	8348	0.923077	-25.9	1	0.00342544	0.353	-0.342067	-0.456477	-5.33701	19	23	10	3UTR		0	0
hsa-miR-1178-3p	NM_001271846	TBC1D16	.((((..((((((((((....&))))))))))..)))).	349	366	0.846154	-21.1	1	1.88665e-06	0.382	4.43072	4.33934	-7.23797	14	17	10	CDS		0	0
hsa-miR-1178-3p	NM_001271848	ZNF700	((.(.((((((((.(((((((&)))))))))................)))))).).)).	2460	2497	0.846154	-18.5	1	1.28914e-05	0.588	-2.22165	-0.763277	-10.471	18	37	9	3UTR		0	0
hsa-miR-1178-3p	NM_001271852	CEP57L1	.((((((((((((((((((((&)))))))))))))...................))))))).	6216	6256	0.923077	-24.9	1	2.86646e-06	0.456	-0.0741283	0.252213	-3.79332	20	40	13	3UTR		0	0
hsa-miR-1178-3p	NM_001271852	CEP57L1	..(((((((((.(((((....&)))))..))))))))).	3494	3511	0.846154	-23	1	1.01706e-05	0.456	-0.565788	-0.398405	-8.3038	14	17	9	3UTR		0	0
hsa-miR-1178-3p	NM_001271853	CEP57L1	.((((((((((((((((((((&)))))))))))))...................))))))).	6230	6270	0.923077	-24.9	1	2.86646e-06	0.456	-0.0741283	0.252213	-3.79332	20	40	13	3UTR		0	0
hsa-miR-1178-3p	NM_001271853	CEP57L1	..(((((((((.(((((....&)))))..))))))))).	3508	3525	0.846154	-23	1	1.01706e-05	0.456	-0.565788	-0.398405	-8.3038	14	17	9	3UTR		0	0
hsa-miR-1178-3p	NM_001271854	GPR176	..((((.((((((((((((((&)))).)))))))))))))).	1464	1484	0.884615	-25.8	1	6.2207e-06	0.368	0.0416139	-0.068255	-6.50069	18	20	14	CDS		0	0
hsa-miR-1178-3p	NM_001271854	GPR176	((((((((((((((.((((..&)))).)))))))....))))))).	1722	1746	1	-24.1	1	0.0337218	0.515	-0.290643	-0.102718	-4.67302	18	24	7	CDS		0	0
hsa-miR-1178-3p	NM_001271855	GPR176	..((((.((((((((((((((&)))).)))))))))))))).	1251	1271	0.884615	-25.8	1	6.2207e-06	0.368	-0.000802	0.11643	-6.50069	18	20	14	CDS		0	0
hsa-miR-1178-3p	NM_001271855	GPR176	((((((((((((((.((((..&)))).)))))))....))))))).	1509	1533	1	-24.1	1	0.0337218	0.515	-0.14533	-0.00816595	-4.67302	18	24	7	CDS		0	0
hsa-miR-1178-3p	NM_001271856	TAMALIN	((((.(.(((((((((((...&))))))))))).).)))).	145	164	0.923077	-22	1	0.000107672	0.441	2.58986	3.46804	-9.6003	16	19	11	5UTR		0	0
hsa-miR-1178-3p	NM_001271856	TAMALIN	(((((....((((((((((..&))))))))))..))))).	1250	1268	0.846154	-19.9	1	0.0021641	0.324	-0.700929	-0.173587	-10.7522	15	18	10	3UTR		0	0
hsa-miR-1178-3p	NM_001271862	PNLDC1	(((((((((.((((((.(((.&.))).))))))))))))))).	667	695	1	-20.4	1	0.16079	0.559	3.6085	1.64627	-5.18008	18	21	15	CDS		0	0
hsa-miR-1178-3p	NM_001271863	KLHDC8A	.(((((..(((((((((((((&)))))))))))))))))).	515	534	0.923077	-26.4	1	1.84318e-06	0.235	0.63469	1.37445	-7.65065	18	19	18	5UTR		0	0
hsa-miR-1178-3p	NM_001271863	KLHDC8A	.(((((.((.(((((((((..&)).))))))).))))))).	1134	1153	0.923077	-22.3	1	0.0687501	0.441	-0.742662	-0.062931	-6.57952	16	19	7	CDS		0	0
hsa-miR-1178-3p	NM_001271865	KLHDC8A	.(((((.((.(((((((((..&)).))))))).))))))).	809	828	0.923077	-22.3	1	0.0687501	0.441	-0.119275	-0.143252	-6.57952	16	19	7	CDS		0	0
hsa-miR-1178-3p	NM_001271865	KLHDC8A	...((((.(((((((((((..&)))))))))))..)))).	1395	1413	1	-21.1	1	0.00115776	0.382	3.26171	3.38985	-8.82818	15	18	11	CDS		0	0
hsa-miR-1178-3p	NM_001271866	GTF2H3	..(((((((((.(((((((..&.)).)))))..))))))))).	2638	2671	1	-23.9	1	5.62703e-05	0.471	0.0611332	-0.0822147	-8.3038	16	21	9	3UTR		0	0
hsa-miR-1178-3p	NM_001271866	GTF2H3	..(((((((((.(((((((..&)))..))))..))))))))).	2162	2183	0.846154	-21.3	1	0.000272936	0.441	0.0489716	-0.0199658	-8.3038	16	21	9	3UTR		0	0
hsa-miR-1178-3p	NM_001271867	GTF2H3	..(((((((((.(((((((..&.)).)))))..))))))))).	2687	2720	1	-23.9	1	5.62703e-05	0.471	0.0611332	-0.0822147	-8.3038	16	21	9	3UTR		0	0
hsa-miR-1178-3p	NM_001271867	GTF2H3	..(((((((((.(((((((..&)))..))))..))))))))).	2211	2232	0.846154	-21.3	1	0.000272936	0.441	0.0489716	-0.0199658	-8.3038	16	21	9	3UTR		0	0
hsa-miR-1178-3p	NM_001271868	GTF2H3	..(((((((((.(((((((..&.)).)))))..))))))))).	2603	2636	0.923077	-23.9	1	5.62703e-05	0.471	0.14018	-0.0787946	-8.3038	16	21	9	3UTR		0	0
hsa-miR-1178-3p	NM_001271868	GTF2H3	..(((((((((.(((((((..&)))..))))..))))))))).	2127	2148	0.846154	-21.3	1	0.000272936	0.441	0.036811	-0.0350149	-8.3038	16	21	9	3UTR		0	0
hsa-miR-1178-3p	NM_001271869	SZRD1	((.(((.(((.((((((((..&)))))))))))))).)).	2704	2722	0.846154	-20.4	1	0.00095378	0.485	2.0302	0.992226	-9.86357	16	18	14	3UTR		0	0
hsa-miR-1178-3p	NM_001271869	SZRD1	...(((.((((((((((....&.))))))))))))).	319	353	0.846154	-20.3	1	5.19654e-06	0.338	5.13928	4.29344	-8.05823	13	15	13	CDS		0	0
hsa-miR-1178-3p	NM_001271869	SZRD1	.(((((.((((((((((((..&)))))..................)))))))..))))).	1149	1187	0.846154	-19	1	0.00136201	0.338	1.08369	1.88852	-5.33701	17	38	7	3UTR		0	0
hsa-miR-1178-3p	NM_001271870	SRGAP2B	((.(((.((.(((((((((..&))))))))).)).))).)).	85	105	0.846154	-19.7	1	0.146255	0.309	0.248541	0.20709	-8.28131	16	20	9	5UTR		0	0
hsa-miR-1178-3p	NM_001271875	CUEDC1	..(((((((.(((((((((..&)))))))).........).))))))).	376	403	0.846154	-22.7	1	7.89551e-05	0.294	2.89888	1.3942	-6.19951	16	27	8	5UTR		0	0
hsa-miR-1178-3p	NM_001271877	ESR2	(((((.(((((((((((((..&))))..................)))))))))...))))).	1340	1380	0.846154	-18.7	1	0.135986	0.397	2.08635	2.81905	-5.83853	18	40	9	CDS		0	0
hsa-miR-1178-3p	NM_001271877	ESR2	...(((((((.((((((....&)))))).))))))).	466	481	0.846154	-18	1	0.000151541	0.485	4.20159	3.58398	-9.33931	13	15	7	CDS		0	0
hsa-miR-1178-3p	NM_001271885	AAGAB	((((((.(((((..(((((..&)))))..))))))))))).	2347	2366	0.923077	-18	1	0.00282959	0.412	4.95092	2.7429	-7.62723	16	19	11	3UTR		0	0
hsa-miR-1178-3p	NM_001271886	AAGAB	.(((((.((((((((((((..&)))))))).))))...........))))).	2555	2585	0.846154	-19.9	1	0.000120682	0.426	3.84715	3.49498	-5.33701	17	30	8	3UTR		0	0
hsa-miR-1178-3p	NM_001271886	AAGAB	((((((.(((((..(((((..&)))))..))))))))))).	2533	2552	0.923077	-18	1	0.00282959	0.412	3.01197	3.14662	-7.62723	16	19	11	3UTR		0	0
hsa-miR-1178-3p	NM_001271888	CIB2	((((.(((((((.((((....&))))))))))))))).	839	855	1	-17.6	1	0.000524038	0.441	2.79289	4.33912	-9.34574	15	16	15	3UTR		0	0
hsa-miR-1178-3p	NM_001271889	CIB2	((((.(((((((.((((....&))))))))))))))).	727	743	1	-17.6	1	0.000524038	0.441	6.05048	3.25093	-9.34574	15	16	15	3UTR		0	0
hsa-miR-1178-3p	NM_001271893	TWIST2	.((.((((((((..(((((..&))))).)))))))))).	764	781	0.846154	-18.3	1	0.000962452	0.338	0.268394	0.193753	-8.97132	15	17	10	3UTR		0	0
hsa-miR-1178-3p	NM_001271895	TARS2	.(((((((((((.((((((..&)))))).)))))))....)))).	408	431	0.923077	-21	1	0.000347797	0.397	3.99966	2.40358	-5.08246	17	23	7	CDS		0	0
hsa-miR-1178-3p	NM_001271896	TARS2	.(((((((((((.((((((..&)))))).)))))))....)))).	408	431	0.923077	-21	1	0.000347797	0.397	3.99966	2.40358	-5.08246	17	23	7	CDS		0	0
hsa-miR-1178-3p	NM_001271899	PPP2R2B	(((((((((((((((((((..&))).)).))))))))))......)))).	166	194	1	-20.5	1	0.00110778	0.456	1.72867	1.78418	-3.93757	19	28	10	5UTR		0	0
hsa-miR-1178-3p	NM_001271899	PPP2R2B	((((((.((((((((((((..&.)))).....................))))))))..)))))).	395	446	1	-20.5	1	0.0261721	0.574	2.66403	3.89678	-5.48126	18	43	8	CDS		0	0
hsa-miR-1178-3p	NM_001271900	PPP2R2B	((((((((((((((..(((..&)))..)))))))))..))))).	8542	8564	1	-21.6	1	0.0168334	0.618	1.36631	0.491432	-4.90607	17	22	9	3UTR		0	0
hsa-miR-1178-3p	NM_001271906	GSKIP	..((((.((.(((((((....&))))))).)))).)).	17	33	0.923077	-15.9	1	0.0422431	0.419	0.512687	0.222463	-7.74319	13	16	7	5UTR		0	0
hsa-miR-1178-3p	NM_001271907	SPATA33	..(((((((((((((.((...&)).))))))))))))).	86	103	0.923077	-22.3	1	7.40988e-09	0.338	0.152532	-0.539718	-5.19005	15	17	13	5UTR		0	0
hsa-miR-1178-3p	NM_001271921	SEC11A	...(((.(((((((((((..(&.)..))))))))).))))).	310	346	0.846154	-17.5	1	0.00071493	0.574	0.941387	1.48991	-8.05823	15	20	9	CDS		0	0
hsa-miR-1178-3p	NM_001271922	SEC11A	.(((((.(((((((((((..(&.)..))))))))).))))))).	460	498	0.846154	-20	1	0.00132438	0.544	0.888598	2.30193	-5.33701	17	22	9	CDS		0	0
hsa-miR-1178-3p	NM_001271926	BCKDK	.((((((((.....(((((..&))))))))))))).	1713	1727	0.846154	-17.9	1	9.37087e-07	0.368	0.341275	0.41902	-13.3534	13	14	13	3UTR		0	0
hsa-miR-1178-3p	NM_001271935	TK2	((((.(((((((((((((...&)))))))....)))))).)))).	1118	1141	0.923077	-23.1	1	5.30617e-05	0.5	0.190717	0.0521208	-8.05661	17	23	7	3UTR		0	0
hsa-miR-1178-3p	NM_001271937	RMND1	..(((((((((.(((((((..&.)).)))))..))))))))).	1207	1254	1	-24.3	1	0.000427046	0.441	2.25117	2.7355	-8.3038	16	21	9	3UTR		0	0
hsa-miR-1178-3p	NM_001271938	MEGF8	.((((((((((....((((((&)))))))))))))))).	9067	9084	1	-24	1	0.000477606	0.309	2.86163	3.50544	-10.0215	16	17	16	CDS		0	0
hsa-miR-1178-3p	NM_001271938	MEGF8	..(((((((((.(((((((..&)).)))))..))))))))).	10087	10107	1	-24	1	2.61107e-05	0.412	0.0591507	-0.209512	-8.3038	16	20	9	3UTR		0	0
hsa-miR-1178-3p	NM_001271943	TFEB	.(((((.((((((((((....&))))))))))...))))).	334	353	1	-22	1	4.70501e-05	0.382	-0.197673	-0.459568	-5.33701	15	19	10	CDS		0	0
hsa-miR-1178-3p	NM_001271944	TFEB	.(((((.((((((((((....&))))))))))...))))).	334	353	1	-22	1	4.70501e-05	0.382	-0.197673	-0.459568	-5.33701	15	19	10	CDS		0	0
hsa-miR-1178-3p	NM_001271945	TFEB	.(((((.((((((((((....&))))))))))...))))).	164	183	1	-22	1	4.70501e-05	0.382	0.585988	0.619328	-5.33701	15	19	10	CDS		0	0
hsa-miR-1178-3p	NM_001271946	SLIT3	.((((((((((((((((((((&)))))))))..............))))))))))).	4234	4269	1	-28.3	1	0.000169168	0.368	0.0773474	-0.0898342	-3.79332	20	35	11	CDS		0	0
hsa-miR-1178-3p	NM_001271948	PPP2R2B	((((((((.(..(((((((..&)))))))..).)))))))).	9984	10004	1	-23.5	1	0.000111323	0.485	0	0	-11.1655	16	20	8	3UTR		0	0
hsa-miR-1178-3p	NM_001271948	PPP2R2B	((((((((((((((..(((..&)))..)))))))))..))))).	8933	8955	1	-21.6	1	0.0168334	0.618	0	0	-4.90607	17	22	9	3UTR		0	0
hsa-miR-1178-3p	NM_001271949	TPGS2	((((((.((((((((((((..&))))))))))))))...............)))).	3517	3551	0.923077	-22.3	1	0.000208305	0.5	0.415756	0.550531	-5.48126	18	34	14	3UTR		0	0
hsa-miR-1178-3p	NM_001271949	TPGS2	(((...(((((((((((((((&)))))))....))))))))...))).	2581	2607	0.846154	-19.8	1	0.00452539	0.515	0.0456547	-0.0591617	-12.9896	18	26	8	3UTR		0	0
hsa-miR-1178-3p	NM_001271950	TPGS2	((((((.((((((((((((..&))))))))))))))...............)))).	3493	3527	0.923077	-22.3	1	0.000208305	0.5	0.415756	0.550531	-5.48126	18	34	14	3UTR		0	0
hsa-miR-1178-3p	NM_001271950	TPGS2	(((...(((((((((((((((&)))))))....))))))))...))).	2557	2583	0.923077	-19.8	1	0.00452539	0.515	-0.130085	-0.087782	-12.9896	18	26	8	3UTR		0	0
hsa-miR-1178-3p	NM_001271951	TPGS2	((((.(((((((.(((((...&))))).)))))))..)))).	1074	1094	0.923077	-21.5	1	0.0368275	0.515	2.47601	3.65465	-9.34574	16	20	7	CDS		0	0
hsa-miR-1178-3p	NM_001271953	TPGS2	((((.(((((((.(((((...&))))).)))))))..)))).	977	997	1	-21.5	1	0.0368275	0.515	2.72047	2.25704	-9.34574	16	20	7	3UTR		0	0
hsa-miR-1178-3p	NM_001271955	TPGS2	((((.(((((((.(((((...&))))).)))))))..)))).	799	819	0.923077	-21.5	1	0.0368275	0.515	2.47601	3.65465	-9.34574	16	20	7	3UTR		0	0
hsa-miR-1178-3p	NM_001271957	SLC39A1	..((((((((((((.((((((&)))))).)))))))..........))))).	2170	2200	0.923077	-22.7	1	0.0263452	0.426	0.0630049	-0.0838185	-5.69245	18	30	7	3UTR		0	0
hsa-miR-1178-3p	NM_001271957	SLC39A1	.(((.((((.(((((((((((&))))))))))).)).)).))).	2372	2394	1	-22.8	1	0.0005696	0.574	-0.05135	-0.0624789	-9.15487	18	22	11	3UTR		0	0
hsa-miR-1178-3p	NM_001271958	SLC39A1	..((((((((((((.((((((&)))))).)))))))..........))))).	1734	1764	1	-22.7	1	0.0263452	0.426	2.65554	2.11415	-5.69245	18	30	7	3UTR		0	0
hsa-miR-1178-3p	NM_001271958	SLC39A1	.(((.((((.(((((((((((&))))))))))).)).)).))).	1936	1958	1	-22.8	1	0.0005696	0.574	1.70325	0.689674	-9.15487	18	22	11	3UTR		0	0
hsa-miR-1178-3p	NM_001271959	SLC39A1	..((((((((((((.((((((&)))))).)))))))..........))))).	2052	2082	0.923077	-22.7	1	0.0263452	0.426	-0.0145929	-0.271381	-5.69245	18	30	7	3UTR		0	0
hsa-miR-1178-3p	NM_001271959	SLC39A1	.(((.((((.(((((((((((&))))))))))).)).)).))).	2254	2276	0.923077	-22.8	1	0.0005696	0.574	0.0466686	-0.13099	-9.15487	18	22	11	3UTR		0	0
hsa-miR-1178-3p	NM_001271960	SLC39A1	..((((((((((((.((((((&)))))).)))))))..........))))).	1899	1929	0.923077	-22.7	1	0.0263452	0.426	-0.0426041	1.70275	-5.69245	18	30	7	3UTR		0	0
hsa-miR-1178-3p	NM_001271960	SLC39A1	.(((.((((.(((((((((((&))))))))))).)).)).))).	2101	2123	1	-22.8	1	0.0005696	0.574	0.0303328	-0.0943947	-9.15487	18	22	11	3UTR		0	0
hsa-miR-1178-3p	NM_001271961	SLC39A1	..((((((((((((.((((((&)))))).)))))))..........))))).	1603	1633	0.923077	-22.7	1	0.0263452	0.426	3.55431	1.91981	-5.69245	18	30	7	3UTR		0	0
hsa-miR-1178-3p	NM_001271961	SLC39A1	.(((.((((.(((((((((((&))))))))))).)).)).))).	1805	1827	1	-22.8	1	0.0005696	0.574	1.86785	0.884817	-9.15487	18	22	11	3UTR		0	0
hsa-miR-1178-3p	NM_001271970	HSP90AB1	..(((..((.(((((((((..&))))))))).))...))).	68	87	0.846154	-20	1	0.000130197	0.353	-0.425779	-0.42029	-9.64415	14	19	9	5UTR		0	0
hsa-miR-1178-3p	NM_001271977	STK25	((((((.((((((((((((..&))).))))))))).)))))).	1167	1188	0.923077	-24.8	1	0.0159232	0.353	-0.536527	-0.15942	-5.48126	18	21	9	CDS		0	0
hsa-miR-1178-3p	NM_001271977	STK25	(((((((((((...(((((..&))))).)))).))))))).	4073	4092	0.923077	-21.3	1	0.0119826	0.5	6.15481	5.11899	-9.43035	16	19	7	3UTR		0	0
hsa-miR-1178-3p	NM_001271978	STK25	((((((.((((((((((((..&))).))))))))).)))))).	1235	1256	0.923077	-24.8	1	0.0159232	0.353	-0.0960319	-0.31131	-5.48126	18	21	9	CDS		0	0
hsa-miR-1178-3p	NM_001271978	STK25	(((((((((((...(((((..&))))).)))).))))))).	4141	4160	0.923077	-21.3	1	0.0119826	0.5	4.44013	4.90062	-9.43035	16	19	7	3UTR		0	0
hsa-miR-1178-3p	NM_001271979	STK25	((((((.((((((((((((..&))).))))))))).)))))).	936	957	0.923077	-24.8	1	0.0159232	0.353	0.28	-0.220526	-5.48126	18	21	9	CDS		0	0
hsa-miR-1178-3p	NM_001271979	STK25	(((((((((((...(((((..&))))).)))).))))))).	3842	3861	0.923077	-21.3	1	0.0119826	0.5	5.92784	4.94217	-9.43035	16	19	7	3UTR		0	0
hsa-miR-1178-3p	NM_001271980	STK25	((((((.((((((((((((..&))).))))))))).)))))).	874	895	0.923077	-24.8	1	0.0159232	0.353	0.043637	-0.244968	-5.48126	18	21	9	CDS		0	0
hsa-miR-1178-3p	NM_001271980	STK25	(((((((((((...(((((..&))))).)))).))))))).	3780	3799	0.923077	-21.3	1	0.0119826	0.5	5.21199	5.53643	-9.43035	16	19	7	3UTR		0	0
hsa-miR-1178-3p	NM_001271985	PUS3	.((((((..(((((((((((.&))))))).)))))))))).	954	973	0.923077	-20.5	1	0.000946204	0.559	3.09581	2.5391	-7.16335	17	19	10	CDS		0	0
hsa-miR-1178-3p	NM_001271985	PUS3	..((((.(((..(((((....&)))))..))))))).	672	687	0.846154	-15.5	1	0.00199437	0.544	2.26101	2.25091	-12.6723	12	15	7	CDS		0	0
hsa-miR-1178-3p	NM_001271989	CEP76	((.(((.(((((((((((...&)))))))).))).))).)).	141	161	0.846154	-20.1	1	0.000119403	0.294	0.463874	0.240284	-7.0388	16	20	8	5UTR		0	0
hsa-miR-1178-3p	NM_001271995	CREB3L3	...(((((.((((((((((((&))))))).)))))))))).	1575	1594	0.846154	-22.8	1	0.000165202	0.368	-0.58759	-0.257133	-7.57093	17	19	10	3UTR		0	0
hsa-miR-1178-3p	NM_001271996	CREB3L3	...(((((.((((((((((((&))))))).)))))))))).	1572	1591	0.846154	-22.8	1	0.000165202	0.368	-0.58759	-0.257133	-7.57093	17	19	10	3UTR		0	0
hsa-miR-1178-3p	NM_001271997	CREB3L3	...(((((.((((((((((((&))))))).)))))))))).	1471	1490	0.846154	-22.8	1	0.000165202	0.368	-0.58759	-0.257133	-7.57093	17	19	10	3UTR		0	0
hsa-miR-1178-3p	NM_001271998	RAB4A	((((.((((((((((((((..&.))))))))...................)))))).)))).	442	510	0.846154	-23.1	1	4.11416e-05	0.618	5.43089	5.66403	-8.05661	18	40	8	CDS		0	0
hsa-miR-1178-3p	NM_001272003	KCNT1	((((((.((.(((((((((((&)))))).....))))).)))))))).	4061	4087	0.846154	-21.8	1	0.0136456	0.265	-0.209009	-0.972592	-6.72377	19	26	8	3UTR		0	0
hsa-miR-1178-3p	NM_001272003	KCNT1	((((.((((.(((((((((..&))))))))))))))))).	11	29	0.923077	-21.5	1	5.2785e-09	0.31	-0.376573	-1.39564	-9.29912	17	18	17	5UTR		0	0
hsa-miR-1178-3p	NM_001272004	EPC1	...((((((.(((.(((((((&))))))).))).)))))).	2978	2997	0.923077	-20.1	1	0.00318962	0.5	4.11337	5.35022	-8.61389	16	19	7	3UTR		0	0
hsa-miR-1178-3p	NM_001272005	OTOP3	..((((((.((((((((....&)))))))))))))).	904	919	0.923077	-21.6	1	8.63451e-06	0.368	7.85873	1.90901	-6.01339	14	15	14	CDS		0	0
hsa-miR-1178-3p	NM_001272007	ISCA2	..(((((((((((((((((..&.))).)))))..))))))))).	2385	2418	0.923077	-24.6	1	0.000201101	0.441	0	0	-4.957	17	22	9	3UTR		0	0
hsa-miR-1178-3p	NM_001272011	MOK	(((((((.(..((((((((..&)).))))))..).))))))).	1354	1375	0.923077	-19	1	0.366955	0.412	5.211	3.57342	-10.3185	16	21	7	CDS		0	0
hsa-miR-1178-3p	NM_001272012	ITPRIP	..((((((((((((((((...&))))))......)))))))))).	5043	5066	0.923077	-21.7	1	0.000281788	0.456	4.2197	2.45438	-4.957	16	23	10	3UTR		0	0
hsa-miR-1178-3p	NM_001272012	ITPRIP	(((((..(((((((((((...&)).)))))))))..))))).	359	379	0.923077	-21.3	1	0.00186771	0.309	-0.00283725	-0.123302	-7.38222	16	20	9	CDS		0	0
hsa-miR-1178-3p	NM_001272012	ITPRIP	..((...((((((((((((..&))))))))))))..)).	2638	2655	0.807692	-21.2	1	0.00157521	0.515	-0.150874	0.102078	-12.5207	14	17	12	3UTR		0	0
hsa-miR-1178-3p	NM_001272013	ITPRIP	..((((((((((((((((...&))))))......)))))))))).	5135	5158	0.923077	-21.7	1	0.000281788	0.456	4.10153	3.47893	-4.957	16	23	10	3UTR		0	0
hsa-miR-1178-3p	NM_001272013	ITPRIP	..((...((((((((((((..&))))))))))))..)).	2730	2747	0.961538	-21.2	1	0.00157521	0.515	0.753817	0.336574	-12.5207	14	17	12	3UTR		0	0
hsa-miR-1178-3p	NM_001272020	NRXN3	..(((((((.(((((((((((&))))))))))).).......)))))).	3821	3848	0.846154	-24.5	1	0.00060874	0.5	0.783614	1.80135	-6.19951	18	27	11	3UTR		0	0
hsa-miR-1178-3p	NM_001272020	NRXN3	(((((((((((((((((((..&))))))))).........)))))).).))).	6417	6448	0.923077	-19.8	1	0.0156797	0.618	-0.156732	0.0782953	-3.93757	19	31	9	3UTR		0	0
hsa-miR-1178-3p	NM_001272020	NRXN3	.((((((((((((((((((..&)))...))))))))))).....................)))).	8694	8737	0.923077	-19.4	1	0.0843162	0.574	-0.266294	-0.0731527	-3.79332	18	43	11	3UTR		0	0
hsa-miR-1178-3p	NM_001272034	STXBP2	((((.((((((((((((((..&))))))))....................)))))))))).	33	72	0.846154	-18.7	1	0.0130075	0.397	1.77689	2.48659	-8.05661	18	39	10	5UTR		0	0
hsa-miR-1178-3p	NM_001272036	LRRC14	..((((.(((.((((((((((&)))))))))))))........)))).	4431	4457	0.846154	-21.4	1	8.87771e-05	0.397	3.28779	1.51808	-9.32546	17	26	13	3UTR		0	0
hsa-miR-1178-3p	NM_001272036	LRRC14	((((((.(((((((((((.((&)).)).)))))))))....)))))).	2802	2828	0.846154	-20.1	1	3.37872e-05	0.309	1.42046	0.409492	-5.48126	19	26	9	3UTR		0	0
hsa-miR-1178-3p	NM_001272038	RAB13	(((((((((.(((((((((..&))))).........))))..))))))))).	937	967	0.923077	-21.2	1	0.0387942	0.397	3.10471	2.83922	-5.18008	18	30	9	3UTR		0	0
hsa-miR-1178-3p	NM_001272039	CDK5RAP2	(((((..((((((((((....&))))))))))...))))).	2012	2031	1	-20	1	0.00562109	0.515	0.437689	1.02454	-7.38222	15	19	10	CDS		0	0
hsa-miR-1178-3p	NM_001272042	RPS6KB1	.(((((((...((((((((..&)).))))))...))))))).	1613	1633	0.846154	-21.4	1	0.0015265	0.559	4.81521	3.99048	-8.917	15	20	7	3UTR		0	0
hsa-miR-1178-3p	NM_001272043	RPS6KB1	..((((.((((((((((((..&)))))))..........))))))))).	118	145	0.807692	-18.8	1	0.00255896	0.441	4.1382	4.08285	-6.50069	16	27	9	CDS		0	0
hsa-miR-1178-3p	NM_001272044	RPS6KB1	.(((((((...((((((((..&)).))))))...))))))).	1811	1831	0.846154	-21.4	1	0.0015265	0.559	4.81521	3.99048	-8.917	15	20	7	3UTR		0	0
hsa-miR-1178-3p	NM_001272046	VWA2	..(((((((((.(((((((..&.)).)))))..))))))))).	3556	3582	1	-23.9	1	0.000817633	0.412	-0.121033	0.0135394	-8.3038	16	21	9	3UTR		0	0
hsa-miR-1178-3p	NM_001272049	TRAP1	.(.((((((((((..((....&)).)))))))))).).	1026	1042	0.923077	-18.1	1	0.00252909	0.382	4.82389	4.81827	-6.94315	13	16	10	CDS		0	0
hsa-miR-1178-3p	NM_001272061	MAGED4	(((((((((.(((((((((..&))))))))).)).))......))))).	205	232	0.846154	-20.1	1	0.000507398	0.471	1.03643	0.638206	-5.18008	18	27	9	CDS		0	0
hsa-miR-1178-3p	NM_001272061	MAGED4	((((.(.(((..(((((((..&)))))))...))).).)))).	137	158	1	-19.1	1	8.07833e-05	0.456	0.678584	0.295356	-15.7719	15	21	7	CDS		0	0
hsa-miR-1178-3p	NM_001272062	MAGED4	(((((((((.(((((((((..&))))))))).)).))......))))).	154	181	0.846154	-20.1	1	0.000507398	0.471	0.389756	0.15069	-5.18008	18	27	9	CDS		0	0
hsa-miR-1178-3p	NM_001272062	MAGED4	((((.(.(((..(((((((..&)))))))...))).).)))).	86	107	1	-19.1	1	7.65742e-05	0.485	0.420549	0.445039	-15.7719	15	21	7	CDS		0	0
hsa-miR-1178-3p	NM_001272063	MAGED4	(((((((((.(((((((((..&))))))))).)).))......))))).	184	211	0.846154	-20.1	1	0.000507398	0.471	0.630244	0.864121	-5.18008	18	27	9	CDS		0	0
hsa-miR-1178-3p	NM_001272063	MAGED4	((((.(.(((..(((((((..&)))))))...))).).)))).	116	137	1	-19.1	1	8.81079e-05	0.456	0.790359	0.590179	-15.7719	15	21	7	CDS		0	0
hsa-miR-1178-3p	NM_001272065	SHISA5	((((.(.(((((((.((((..&)))).)))))))))))).	51	69	0.846154	-19.1	1	3.707e-05	0.191	0.0907316	0.48163	-10.3357	16	18	12	5UTR		0	0
hsa-miR-1178-3p	NM_001272067	SHISA5	..((((((((((((.((....&)).))))))).))))).	570	587	0.846154	-19.8	1	3.67578e-06	0.324	-0.483174	0.0343796	-5.69245	14	17	7	CDS		0	0
hsa-miR-1178-3p	NM_001272072	AOC1	((((((((.(((((((((...&))))...))))).))).))))).	1997	2020	0.846154	-20.2	1	1.15783e-06	0.382	2.78494	2.79656	-4.99396	17	23	5	CDS		0	0
hsa-miR-1178-3p	NM_001272072	AOC1	..((((((((((....(((((&))))).)))))))))).	2115	2132	0.974359	-19.4	1	1.6848e-06	0.426	4.24722	3.36142	-8.07147	15	17	10	CDS		0	0
hsa-miR-1178-3p	NM_001272075	USP10	((((((((.((((((((((..&))))))).))))))))))).	36	56	0.980769	-25.4	1	9.94204e-05	0.324	1.23176	0.645625	-4.99396	18	20	11	5UTR		0	0
hsa-miR-1178-3p	NM_001272087	SLC1A6	.(((((.(((.((((((((..&))))))))))).))))).	68	86	0.826923	-21.9	1	0.000283139	0.176	-0.0291421	-0.434852	-8.16179	16	18	11	5UTR		0	0
hsa-miR-1178-3p	NM_001272088	SLC1A6	.(((((.(((.((((((((..&))))))))))).))))).	68	86	0.826923	-21.9	1	0.000283139	0.176	-0.0291421	-0.434852	-8.16179	16	18	11	5UTR		0	0
hsa-miR-1178-3p	NM_001272088	SLC1A6	..(((((((((((((.(((..&)))...))))))))...))))).	995	1018	0.846154	-18	1	0.000571188	0.397	2.28096	3.23755	-5.19005	16	23	8	CDS		0	0
hsa-miR-1178-3p	NM_001272096	STX4	(((((((((((((((((....&.))))........))))))))))))).	849	881	0.923077	-21.6	1	6.87625e-05	0.485	2.53563	3.03857	-3.93757	17	27	13	CDS		0	0
hsa-miR-1178-3p	NM_001272096	STX4	((((((..(((((((((((..&))).))))))))..)))))).	782	803	0.846154	-21.5	1	0.00993002	0.456	2.97562	3.22908	-7.7949	17	21	8	CDS		0	0
hsa-miR-1178-3p	NM_001272106	PAQR6	((((((.(((((((((((...&)))))))).))))))))).	846	865	0.820513	-24.5	1	7.83676e-07	0.309	0.671522	0.729063	-5.48126	17	19	9	CDS		0	0
hsa-miR-1178-3p	NM_001273	CHD4	..((((...((((((((((((&))))))))))))..)))).	414	433	0.846154	-21.7	1	6.63041e-05	0.324	1.99108	1.62591	-9.87071	16	19	12	CDS		0	0
hsa-miR-1178-3p	NM_001274	CHEK1	(((((((((((((((((((..&)))))))......))))..)))))))).	1616	1644	1	-20.6	1	0.000910805	0.559	3.08476	3.04584	-3.93757	19	28	8	CDS		0	0
hsa-miR-1178-3p	NM_001274	CHEK1	..(((..((.(((((((((..&)))))))))..))..))).	2439	2458	1	-19.7	1	0.0743721	0.676	-0.00378474	0.446693	-9.64415	14	19	9	3UTR		0	0
hsa-miR-1178-3p	NM_001275	CHGA	..((((.(((((((((((...&))))))))))).)))).	1167	1184	1	-26.3	1	0.000596547	0.309	0.681732	1.32732	-6.50069	15	17	11	CDS		0	0
hsa-miR-1178-3p	NM_001275	CHGA	((.(((.((.(((((((((((&))))))))))).))))).)).	718	739	0.846154	-25.2	1	0.0969933	0.353	-0.54907	-0.0839864	-8.28131	18	21	11	CDS		0	0
hsa-miR-1178-3p	NM_001275	CHGA	.(((((.((((((.(((((..&.)))))))))))))))).	1057	1107	0.923077	-25.2	1	0.0185346	0.397	1.21417	0.568588	-6.19385	16	18	16	CDS		0	0
hsa-miR-1178-3p	NM_001276	CHI3L1	.(((((((((((((((((((.&))))))..........))))))))))).)).	1414	1445	1	-22.9	1	0.000399298	0.471	2.36531	3.36991	-3.79332	19	31	11	3UTR		0	0
hsa-miR-1178-3p	NM_001276249	LDLRAD4	..((((...((((((((((..&)))))))))))))).	14	29	0.923077	-21.2	1	0.00125655	0.362	-0.0443641	0.0980261	-9.87071	14	15	14	5UTR		0	1
hsa-miR-1178-3p	NM_001276249	LDLRAD4	...(((((((((((((((.((&)))))))))..........)))))))).	3965	3993	0.923077	-20.5	1	0.000449078	0.588	-0.114267	-0.521125	-6.51454	17	28	9	3UTR		0	1
hsa-miR-1178-3p	NM_001276249	LDLRAD4	.(((((((.(((((((((.((&)).).)))))))).)).))))).	7522	7545	0.846154	-20.4	1	7.873e-06	0.529	0.186745	0.10127	-4.84971	18	23	8	3UTR		0	1
hsa-miR-1178-3p	NM_001276251	LDLRAD4	...(((((((((((((((.((&)))))))))..........)))))))).	4509	4537	0.923077	-20.5	1	0.000449078	0.588	-0.114267	-0.521125	-6.51454	17	28	9	3UTR		0	1
hsa-miR-1178-3p	NM_001276251	LDLRAD4	.(((((((.(((((((((.((&)).).)))))))).)).))))).	8066	8089	0.846154	-20.4	1	7.873e-06	0.529	0.186745	0.10127	-4.84971	18	23	8	3UTR		0	1
hsa-miR-1178-3p	NM_001276251	LDLRAD4	(((((((((.(((.((((...&)))).))).).)))))))).	1820	1840	1	-20.6	1	0.0160961	0.456	0.350232	0.831413	-6.03692	16	20	8	3UTR		0	1
hsa-miR-1178-3p	NM_001276252	WDTC1	..(((((((.(((((((((..&))))))))).))))))).	3395	3413	0.852564	-25.9	1	4.37296e-08	0.382	1.00918	1.22962	-6.19951	16	18	9	3UTR		0	0
hsa-miR-1178-3p	NM_001276252	WDTC1	((((((.((.(((.(((((..&)))))))).)).)))))).	4025	4044	1	-21.6	1	0.0213075	0.368	0.517501	1.29158	-7.58061	16	19	8	3UTR		0	0
hsa-miR-1178-3p	NM_001276260	RGS3	((.(((.((.(((((((((..&))))))))).))))).)).	941	960	0.923077	-22.3	1	0.208604	0.353	2.00448	2.85852	-8.28131	16	19	9	CDS		0	0
hsa-miR-1178-3p	NM_001276260	RGS3	..((.(.((((((((((((..&))))).)))))))))).	877	894	0.884615	-19.2	1	1.57366e-05	0.397	1.42392	2.75094	-10.6197	15	17	10	CDS		0	0
hsa-miR-1178-3p	NM_001276261	RGS3	...((((((((((((((((((&)))))))))).................)))))).)).	742	779	0.923077	-21.7	1	0.045722	0.426	3.1238	2.94773	-6.51454	18	37	10	CDS		0	0
hsa-miR-1178-3p	NM_001276261	RGS3	..(((...(((((((((((..&))))))))))).))).	963	979	1	-20.5	1	0.00128694	0.456	3.27966	3.67622	-10.7153	14	16	11	CDS		0	0
hsa-miR-1178-3p	NM_001276262	RGS3	..((((.((((((((((((..&.))).))))))))))))).	53	92	1	-22.9	1	1.93411e-06	0.309	-0.185878	-0.189141	-6.50069	16	19	13	5UTR		0	0
hsa-miR-1178-3p	NM_001276265	DUOXA1	((((((((.(....(((((((&)))))))...).))).))))).	230	252	0.846154	-17.3	1	0.000286395	0.426	0.0989214	-0.40403	-13.3115	16	22	7	CDS		0	0
hsa-miR-1178-3p	NM_001276267	DUOXA1	..(((((((((((((((((..&)))))))))...)))..))))).	2464	2487	0.846154	-18.4	1	0.000399659	0.456	2.57658	3.52723	-4.957	17	23	9	3UTR		0	0
hsa-miR-1178-3p	NM_001276268	DUOXA1	..(((((((((((((((((..&)))))))))...)))..))))).	2123	2146	0.923077	-18.4	1	0.000399659	0.456	2.00855	2.26513	-4.957	17	23	9	3UTR		0	0
hsa-miR-1178-3p	NM_001276268	DUOXA1	(((((((((.((((..(((..&)))..)))).))))))))).	1702	1722	0.846154	-18	1	7.1099e-06	0.353	0.34561	-0.212514	-6.14858	16	20	9	3UTR		0	0
hsa-miR-1178-3p	NM_001276275	MAZ	...(((((((((.((((((..&))))))))))))))).	1879	1895	0.923077	-22	1	0.00034947	0.368	0.0540434	0.722264	-7.80367	15	16	15	3UTR		0	0
hsa-miR-1178-3p	NM_001276275	MAZ	(((((((((.(...(((((((&)))))))..).))))))))).	2065	2086	0.846154	-21.5	1	2.65949e-05	0.368	0.531625	1.30563	-10.6729	17	21	9	3UTR		0	0
hsa-miR-1178-3p	NM_001276275	MAZ	((((((.(.((((((((((..&))))))))))))))))).	1409	1427	0.948718	-20.4	1	0.0564588	0.412	0.732057	0.927042	-6.53765	17	18	17	3UTR		0	0
hsa-miR-1178-3p	NM_001276275	MAZ	(((((((((((((........&))))))))))))).	1629	1643	1	-20.6	1	2.25645e-05	0.338	1.20861	0.726518	-5.76291	13	14	13	3UTR		0	0
hsa-miR-1178-3p	NM_001276276	MAZ	...(((((((((.((((((..&))))))))))))))).	1185	1201	0.923077	-22	1	0.00034947	0.368	0.0540434	0.722264	-7.80367	15	16	15	3UTR		0	0
hsa-miR-1178-3p	NM_001276276	MAZ	(((((((((.(...(((((((&)))))))..).))))))))).	1371	1392	0.846154	-21.5	1	2.65949e-05	0.368	0.531625	1.30563	-10.6729	17	21	9	3UTR		0	0
hsa-miR-1178-3p	NM_001276276	MAZ	((((((.(.((((((((((..&))))))))))))))))).	715	733	0.948718	-20.4	1	0.0564588	0.412	0.732057	0.927042	-6.53765	17	18	17	3UTR		0	0
hsa-miR-1178-3p	NM_001276276	MAZ	(((((((((((((........&))))))))))))).	935	949	1	-20.6	1	2.25645e-05	0.338	1.20861	0.726518	-5.76291	13	14	13	3UTR		0	0
hsa-miR-1178-3p	NM_001276277	PPIP5K2	.(((.((((((.(((((((((&)))))..)))).))))))))).	10701	10723	0.846154	-22.4	1	2.52913e-07	0.485	-0.995683	-0.453377	-11.2592	18	22	9	3UTR		0	0
hsa-miR-1178-3p	NM_001276277	PPIP5K2	..((((.((((((((((((..&)))))))).....)))).)))).	14644	14667	0.846154	-19.6	1	0.108771	0.618	-0.287668	0.0327921	-6.50069	16	23	8	3UTR		0	0
hsa-miR-1178-3p	NM_001276277	PPIP5K2	(((((((((.(((((((((((&)))))...............)))))).)))))).))).	12348	12386	0.923077	-19.6	1	0.182815	0.574	-0.120142	0.0604659	-5.18008	20	38	6	3UTR		0	0
hsa-miR-1178-3p	NM_001276286	BBX	((((((..((.(((((((...&)))))))))..)))))).	1932	1950	0.923077	-19.6	1	5.55314e-06	0.397	0.969236	2.40231	-10.6197	15	18	9	CDS		0	0
hsa-miR-1178-3p	NM_001276286	BBX	..((((((((....(((((..&)))))...)))))))).	2177	2194	0.846154	-18.1	1	4.66356e-05	0.544	3.51005	3.33948	-13.2745	13	17	8	CDS		0	0
hsa-miR-1178-3p	NM_001276289	PRKAR1A	..((((.((.(((((((((((&))))))))))))))))).	838	856	0.807692	-21.4	1	0.0174398	0.544	6.19462	6.13206	-7.74319	17	18	17	CDS		0	0
hsa-miR-1178-3p	NM_001276290	PRKAR1A	..((((.((.(((((((((((&))))))))))))))))).	586	604	0.807692	-21.4	1	0.0174398	0.544	7.00401	5.81292	-7.74319	17	18	17	CDS		0	0
hsa-miR-1178-3p	NM_001276293	NISCH	(((((((.(.(((((((((..&)))))..)))).).))))))).	2536	2558	0.846154	-19.7	1	0.00129092	0.426	0.295674	-0.243311	-7.49372	17	22	7	3UTR		0	0
hsa-miR-1178-3p	NM_001276294	NISCH	(((((((.(.(((((((((..&)))))..)))).).))))))).	1953	1975	0.846154	-19.7	1	0.00129092	0.426	0.295674	-0.243311	-7.49372	17	22	7	3UTR		0	0
hsa-miR-1178-3p	NM_001276294	NISCH	..((((.(((((((..(((..&))).))))))))))).	2349	2365	0.923077	-19.3	1	8.30394e-05	0.382	-0.701306	-0.174141	-7.46919	14	16	11	3UTR		0	0
hsa-miR-1178-3p	NM_001276309	NOL3	.(.(((((((..(((((....&)))))..))))))).).	1259	1276	0.923077	-19.3	1	1.55952e-05	0.485	0.0331757	0.492844	-11.5224	13	17	7	3UTR		0	0
hsa-miR-1178-3p	NM_001276310	STMN3	((((((.((((((((((....&.)))))))))).)))))).	1649	1673	0.865385	-22.8	1	3.30901e-07	0.368	3.02363	2.61617	-5.48126	16	19	10	3UTR		0	0
hsa-miR-1178-3p	NM_001276311	NOL3	..((((.((.(((((((((..&.))))))))).))..)))).	25	55	0.923077	-23.3	1	0.00913144	0.368	-0.260322	-0.0785969	-7.74319	15	20	9	5UTR		0	0
hsa-miR-1178-3p	NM_001276318	PPP1R3E	.(((((.(((((((((((...&))))))....)))))))))).	3817	3838	0.897436	-21.7	1	0.000219698	0.441	1.8099	1.48166	-5.33701	16	21	10	3UTR		0	0
hsa-miR-1178-3p	NM_001276319	NOL3	..((((.((.(((((((((..&.))))))))).))..)))).	359	389	0.923077	-23.3	1	0.0088813	0.368	-0.260322	0.129029	-7.74319	15	20	9	CDS		0	0
hsa-miR-1178-3p	NM_001276320	YOD1	...(((..(((((((((((((&)))))))))))))...))).	862	882	0.923077	-20.9	1	0.00347921	0.588	0.939504	0.340059	-10.3719	16	20	13	CDS		0	0
hsa-miR-1178-3p	NM_001276320	YOD1	..((((((((((((((((((.&)))))..)))))))))).........))).	79	109	0.923077	-19.2	1	0.00066371	0.544	1.56873	1.09585	-4.957	18	30	10	5UTR		0	0
hsa-miR-1178-3p	NM_001276325	SETMAR	.(((((((((.....((((..&.))))))))))))).	29	51	0.846154	-16.3	1	0.000155422	0.353	-0.609849	0.0280739	-12.8463	13	15	13	5UTR		0	0
hsa-miR-1178-3p	NM_001276326	SLC22A12	.((((((..(((((((((...&))))))))))))))).	1208	1224	0.923077	-23.4	1	2.75477e-07	0.338	0.690889	-0.37305	-7.16335	15	16	15	CDS		0	0
hsa-miR-1178-3p	NM_001276327	SLC22A12	.((((((..(((((((((...&))))))))))))))).	986	1002	1	-23.4	1	2.75477e-07	0.338	0.313142	0.845689	-7.16335	15	16	15	CDS		0	0
hsa-miR-1178-3p	NM_001276336	EIF4E2	..((((.((((.((((((...&)))))).)))))))).	2217	2233	0.923077	-21.1	1	0.000688255	0.515	0.618864	0.0165526	-9.84749	14	16	8	3UTR		0	1
hsa-miR-1178-3p	NM_001276337	EIF4E2	..((((.((((.((((((...&)))))).)))))))).	2082	2098	0.923077	-21.1	1	0.000688255	0.515	0.618864	0.0165526	-9.84749	14	16	8	3UTR		0	1
hsa-miR-1178-3p	NM_001276343	AGAP4	.(((((.((((((((((((((&)))))))..)))..))))))))).	232	256	1	-22.7	1	0.000378451	0.368	0.728484	1.22696	-5.33701	19	24	9	CDS		0	0
hsa-miR-1178-3p	NM_001276343	AGAP4	((((((.((((((((.(((((&)))))..))))))))....)))))).	1754	1780	0.846154	-19.9	1	0.00184218	0.441	3.28182	2.19782	-5.71431	19	26	8	CDS		0	0
hsa-miR-1178-3p	NM_001276343	AGAP4	....(((((((((((((((..&))))))))......))))))).	1803	1825	1	-19.2	1	0.0126574	0.515	1.64738	1.87074	-9.54656	15	22	8	CDS		0	0
hsa-miR-1178-3p	NM_001276345	TNNT2	((((((((((((((((((...&)))))))).)))..))))))).	696	718	0.923077	-23.9	1	0.0210636	0.485	4.24135	4.19369	-3.93757	18	22	8	CDS		0	0
hsa-miR-1178-3p	NM_001276345	TNNT2	((((((.(((((((.(((...&))).)))))))...)))))).	493	514	0.846154	-21.9	1	0.000179434	0.338	4.03459	4.11032	-6.21671	16	21	7	CDS		0	0
hsa-miR-1178-3p	NM_001276345	TNNT2	(((((..((((((((((((..&)).)))))))))).....))))).	107	131	1	-20.4	1	0.00307509	0.441	-0.360708	-0.242411	-7.38222	17	24	10	CDS		0	0
hsa-miR-1178-3p	NM_001276346	TNNT2	((((((((((((((((((...&)))))))).)))..))))))).	567	589	0.923077	-23.9	1	0.00550464	0.485	3.76681	3.62788	-3.93757	18	22	8	CDS		0	0
hsa-miR-1178-3p	NM_001276346	TNNT2	((((((.(((((((.(((...&))).)))))))...)))))).	373	394	0.820513	-21.9	1	0.00127389	0.368	3.86117	3.62577	-6.21671	16	21	7	CDS		0	0
hsa-miR-1178-3p	NM_001276346	TNNT2	(((((..((((((((((((..&)).)))))))))).....))))).	107	131	1	-20.4	1	0.00307509	0.441	-0.360708	-0.242411	-7.38222	17	24	10	CDS		0	0
hsa-miR-1178-3p	NM_001276347	TNNT2	((((((((((((((((((...&)))))))).)))..))))))).	799	821	0.923077	-23.9	1	0.0210636	0.485	4.62816	4.21381	-3.93757	18	22	8	CDS		0	0
hsa-miR-1178-3p	NM_001276347	TNNT2	((((((.(((((((.(((...&))).)))))))...)))))).	596	617	0.846154	-21.9	1	0.000179434	0.338	4.99699	3.69114	-6.21671	16	21	7	CDS		0	0
hsa-miR-1178-3p	NM_001276373	USF1	..((((((((.((((((((((&))))))))))......))))).))).	228	254	0.923077	-22.6	1	9.89641e-06	0.412	0.770503	0.40894	-7.78178	18	26	10	CDS		0	0
hsa-miR-1178-3p	NM_001276373	USF1	..((.((((((((((((((..&)))))))).......)))))))).	1552	1576	0.846154	-21.2	1	0.000433145	0.485	2.80412	3.34959	-9.07604	16	24	8	3UTR		0	0
hsa-miR-1178-3p	NM_001276373	USF1	..((.((((((((((((....&)))))).)))))))).	211	227	1	-18.7	1	8.81377e-05	0.441	0.461815	0.268884	-9.07604	14	16	8	CDS		0	0
hsa-miR-1178-3p	NM_001276378	LZTFL1	(((((..((..((((((((..&))))))))..))..))))).	352	372	0.923077	-19.4	1	0.000196282	0.5	0.0301418	0.0377102	-11.4495	15	20	8	5UTR		0	0
hsa-miR-1178-3p	NM_001276379	LZTFL1	(((((..((..((((((((..&))))))))..))..))))).	352	372	0.923077	-19.4	1	0.000196282	0.5	0.0301418	0.0377102	-11.4495	15	20	8	CDS		0	0
hsa-miR-1178-3p	NM_001276385	ICE2	....(((((((((((((((..&))))))))....))))))).	2386	2406	0.923077	-21.6	1	0.0164992	0.574	0.341818	0.220646	-9.54656	15	20	8	3UTR		0	0
hsa-miR-1178-3p	NM_001276385	ICE2	..((.((((((((.(((((..&))))).))......)))))))).	2883	2906	0.942308	-18.2	1	0.00671482	0.618	0.134511	1.50866	-9.93288	15	23	8	3UTR		0	0
hsa-miR-1178-3p	NM_001276389	KIZ	.((((((((.(((((((((..&))).)))))).)))..))))).	1014	1036	0.846154	-18	1	0.0110233	0.544	1.75085	1.53826	-5.03583	17	22	6	CDS		0	0
hsa-miR-1178-3p	NM_001276414	UNKL	..(((((((((.(((((((((&))))).....))))..))))))))).	2405	2431	0.923077	-23	1	6.98661e-06	0.338	2.22315	1.16532	-8.3038	18	26	9	3UTR		0	0
hsa-miR-1178-3p	NM_001276414	UNKL	(((((((((((((((..((((&))))....)))))))).))))))).	3667	3692	0.846154	-21	1	7.3841e-05	0.426	-0.293445	0.886687	-4.17062	19	25	8	3UTR		0	0
hsa-miR-1178-3p	NM_001276418	SEC16A	(((((((((((((((((((..&)).))).))))))))..)))))).	4081	4105	0.961538	-21.6	1	0.000220522	0.574	2.87415	5.02074	-3.93757	19	24	8	CDS		0	0
hsa-miR-1178-3p	NM_001276435	KCNJ15	..((((((((((((((((((.&))))))...)))))..))))))).	717	741	0.923077	-23.5	1	0.00252021	0.515	4.92598	2.28551	-4.957	18	24	7	CDS		0	0
hsa-miR-1178-3p	NM_001276435	KCNJ15	..((((.((.(((((((....&))))))).)))))).	2787	2802	0.923077	-20.1	1	0.0834065	0.529	-0.426212	-0.207024	-7.74319	13	15	7	3UTR		0	0
hsa-miR-1178-3p	NM_001276436	KCNJ15	..((((((((((((((((((.&))))))...)))))..))))))).	720	744	0.923077	-23.5	1	0.00252021	0.515	4.92598	2.28551	-4.957	18	24	7	CDS		0	0
hsa-miR-1178-3p	NM_001276436	KCNJ15	..((((.((.(((((((....&))))))).)))))).	2790	2805	0.923077	-20.1	1	0.0834065	0.529	-0.426212	-0.207024	-7.74319	13	15	7	3UTR		0	0
hsa-miR-1178-3p	NM_001276436	KCNJ15	...((((((((((((((((..&))).).)))))))))))).	3569	3588	0.923077	-19.6	1	0.209412	0.618	0	0	-6.51454	16	19	12	3UTR		0	0
hsa-miR-1178-3p	NM_001276453	KPNB1	...(((.((.((((((((((.&)))))))))).)).))).	3731	3749	0.923077	-21.1	1	0.0468061	0.529	2.29785	2.46299	-9.30073	15	18	10	3UTR		0	0
hsa-miR-1178-3p	NM_001276453	KPNB1	..(((((((.(((((((((..&))))))))).))....))))).	3211	3233	0.923077	-19.8	1	0.00101629	0.441	1.40875	1.82438	-6.19951	16	22	9	3UTR		0	0
hsa-miR-1178-3p	NM_001276457	ELF2	((((.(((((..(((((....&)))))))))))))).	1377	1392	0.923077	-17.3	1	0.00838539	0.574	2.52223	2.77698	-14.2282	14	15	14	CDS		0	0
hsa-miR-1178-3p	NM_001276457	ELF2	(((((((((.((((((((...&))))))))...)).))))))).	1887	1909	1	-17.8	1	0.0148092	0.632	2.04018	3.33993	-5.18008	17	22	8	3UTR		0	0
hsa-miR-1178-3p	NM_001276458	ELF2	((((.(((((..(((((....&)))))))))))))).	1428	1443	1	-17.3	1	0.00838539	0.574	2.81511	3.0654	-14.2282	14	15	14	CDS		0	0
hsa-miR-1178-3p	NM_001276458	ELF2	(((((((((.((((((((...&))))))))...)).))))))).	1938	1960	1	-17.8	1	0.0148092	0.632	3.05918	2.43376	-5.18008	17	22	8	3UTR		0	0
hsa-miR-1178-3p	NM_001276460	CALHM6	((((((.(((((((.......&.))))))))))))).	165	185	1	-17.8	1	0.00411649	0.603	1.67544	1.42306	-6.44976	13	15	13	CDS		0	0
hsa-miR-1178-3p	NM_001276464	NR5A2	...((..((((((((((((..&))))))))...))))..)).	1856	1876	0.923077	-18.5	1	0.320147	0.529	0.574016	1.34443	-9.95919	14	20	8	3UTR		0	0
hsa-miR-1178-3p	NM_001276468	B4GALNT1	((((((.((((((((((....&)))))))))))))))).	4495	4512	1	-25.5	1	0.107053	0.441	4.238	3.15575	-5.48126	16	17	16	3UTR		0	0
hsa-miR-1178-3p	NM_001276468	B4GALNT1	...((((((.(((((((((((&))))))))))))))))).	3597	3615	0.846154	-24.9	1	2.57261e-05	0.397	2.65334	4.29882	-7.75705	17	18	17	3UTR		0	0
hsa-miR-1178-3p	NM_001276469	B4GALNT1	((((((((((((((((.((..&)).)))))))............))))))))).	1183	1215	0.846154	-19.9	1	0.00115459	0.426	1.29254	1.97915	-3.93757	18	32	9	CDS		0	0
hsa-miR-1178-3p	NM_001276471	CORO1C	(((((...(((((((((((..&))))))))))).))))).	150	168	0.923077	-21.6	1	0.0302618	0.309	-0.0117915	1.20762	-9.69585	16	18	11	5UTR		0	0
hsa-miR-1178-3p	NM_001276471	CORO1C	((.((..(((.((((((((((&)))))))))))))..)).)).	1724	1745	0.923077	-20.2	1	0.00134991	0.471	1.04787	1.4201	-11.7645	17	21	13	3UTR		0	0
hsa-miR-1178-3p	NM_001276490	SERPINB8	.((((((((.(((((((....&))))))).)).)))))).	584	602	1	-22	1	6.20837e-05	0.426	-0.502046	1.88076	-5.03583	15	18	7	CDS		0	0
hsa-miR-1178-3p	NM_001276490	SERPINB8	(((((.(((((((((((....&)))))))))))...))))).	29	49	0.846154	-19.6	1	0.00224522	0.368	0.143806	-0.285492	-5.83853	16	20	11	5UTR		0	0
hsa-miR-1178-3p	NM_001276495	PSG4	..(((..((((((((((((..&)).))))))))))...))).	9	29	0.846154	-19	1	0.00120181	0.448	0	0	-8.40165	15	20	10	5UTR		0	0
hsa-miR-1178-3p	NM_001276501	GPSM3	.((((((((..((((((((..&))))))))..)))))))).	1024	1043	1	-24.3	1	2.32139e-07	0.471	0.446741	1.09956	-7.86061	16	19	8	3UTR		0	0
hsa-miR-1178-3p	NM_001276501	GPSM3	((((((.((((((.((((((.&))))))..))))))..)))))).	561	584	0.923077	-21.8	1	0.00147031	0.368	0.206609	0.516721	-6.3381	18	23	6	CDS		0	0
hsa-miR-1178-3p	NM_001276695	TP53	.......((((((((((((..&.)))))))))))).	1265	1291	0.923077	-20.3	0	5.98025e-08	0.382	1.62542	1.07899	-17.1102	12	14	12	3UTR		0	0
hsa-miR-1178-3p	NM_001276695	TP53	((((((.(((((((((((((.&)))))))))..)))).)))))).	1567	1590	1	-21.2	1	0.0731971	0.559	0.970252	2.45819	-5.48126	19	23	9	3UTR		0	0
hsa-miR-1178-3p	NM_001276696	TP53	.......((((((((((((..&.)))))))))))).	1338	1364	0.923077	-20.3	0	5.98025e-08	0.382	2.62802	1.34082	-17.1102	12	14	12	3UTR		0	0
hsa-miR-1178-3p	NM_001276696	TP53	((((((.(((((((((((((.&)))))))))..)))).)))))).	1640	1663	1	-21.2	1	0.0731971	0.559	0.970252	2.45819	-5.48126	19	23	9	3UTR		0	0
hsa-miR-1178-3p	NM_001276698	TP53	.......((((((((((((..&.)))))))))))).	829	855	1	-20.3	0	5.98025e-08	0.382	0.0676517	0.140098	-17.1102	12	14	12	3UTR		0	0
[truncated: 49,912 more rows]

## Sheet: TargetScan
Target gene	Representative transcript	Gene name	3P-seq tags + 5	Total sites	8mer sites	7mer-m8 sites	7mer-A1 sites	6mer sites	Representative miRNA	Cumulative weighted context++ score	Total context++ score	Aggregate PCT
SLC38A6	ENST00000456840.2	solute carrier family 38, member 6	69	1	1	0	0	0	hsa-miR-1178-3p	-0.79	-0.79	N/A
EDNRA	ENST00000339690.5	endothelin receptor type A	35	2	2	0	0	0	hsa-miR-1178-3p	-0.78	-0.78	N/A
AADAC	ENST00000232892.7	arylacetamide deacetylase	5	1	1	0	0	1	hsa-miR-1178-3p	-0.74	-0.76	N/A
APITD1	ENST00000309048.3	apoptosis-inducing, TAF9-like domain 1	822	1	1	0	0	0	hsa-miR-1178-3p	-0.72	-0.72	N/A
PPP3R2	ENST00000374806.1	protein phosphatase 3, regulatory subunit B, beta	5	3	0	2	1	1	hsa-miR-1178-3p	-0.7	-0.7	N/A
WDR66	ENST00000288912.4	WD repeat domain 66	27	1	1	0	0	0	hsa-miR-1178-3p	-0.69	-0.69	N/A
KIAA1377	ENST00000263468.8	KIAA1377	35	2	1	1	0	0	hsa-miR-1178-3p	-0.69	-0.69	N/A
KLRG1	ENST00000356986.3	killer cell lectin-like receptor subfamily G, member 1	15	1	1	0	0	0	hsa-miR-1178-3p	-0.68	-0.68	N/A
SLC39A6	ENST00000269187.5	solute carrier family 39 (zinc transporter), member 6	208	2	1	1	0	0	hsa-miR-1178-3p	-0.64	-0.65	N/A
TMEM235	ENST00000586400.1	transmembrane protein 235	5	2	1	1	0	1	hsa-miR-1178-3p	-0.63	-0.63	N/A
AMMECR1	ENST00000262844.5	Alport syndrome, mental retardation, midface hypoplasia and elliptocytosis chromosomal region gene 1	5	6	0	2	4	3	hsa-miR-1178-3p	-0.63	-0.63	N/A
MMGT1	ENST00000305963.2	membrane magnesium transporter 1	113	2	1	1	0	2	hsa-miR-1178-3p	-0.62	-0.65	N/A
PPP3CB	ENST00000360663.5	protein phosphatase 3, catalytic subunit, beta isozyme	105	2	2	0	0	2	hsa-miR-1178-3p	-0.61	-0.65	N/A
PET100	ENST00000594797.1	PET100 homolog (S. cerevisiae)	5	2	0	2	0	0	hsa-miR-1178-3p	-0.61	-0.61	N/A
PIWIL1	ENST00000245255.3	piwi-like RNA-mediated gene silencing 1	5	3	1	2	0	0	hsa-miR-1178-3p	-0.6	-0.6	N/A
C10orf82	ENST00000369210.3	chromosome 10 open reading frame 82	5	1	1	0	0	0	hsa-miR-1178-3p	-0.59	-0.59	N/A
RABL3	ENST00000273375.3	RAB, member of RAS oncogene family-like 3	165	2	1	0	1	0	hsa-miR-1178-3p	-0.59	-0.59	N/A
HARS2	ENST00000435019.2	histidyl-tRNA synthetase 2, mitochondrial	150	2	1	1	0	0	hsa-miR-1178-3p	-0.59	-0.59	N/A
RSAD2	ENST00000382040.3	radical S-adenosyl methionine domain containing 2	5	2	1	0	1	0	hsa-miR-1178-3p	-0.56	-0.56	N/A
PYCR2	ENST00000343818.6	pyrroline-5-carboxylate reductase family, member 2	1190	1	1	0	0	0	hsa-miR-1178-3p	-0.56	-0.58	N/A
CCR8	ENST00000414803.1	chemokine (C-C motif) receptor 8	5	1	1	0	0	0	hsa-miR-1178-3p	-0.56	-0.56	N/A
PIDD	ENST00000411829.2	p53-induced death domain protein	54	1	1	0	0	0	hsa-miR-1178-3p	-0.56	-0.56	N/A
EPPIN-WFDC6	ENST00000504988.1	EPPIN-WFDC6 readthrough	5	1	1	0	0	0	hsa-miR-1178-3p	-0.55	-0.55	N/A
EPPIN	ENST00000555685.1	epididymal peptidase inhibitor	5	1	1	0	0	0	hsa-miR-1178-3p	-0.55	-0.55	N/A
PPIL1	ENST00000373699.5	peptidylprolyl isomerase (cyclophilin)-like 1	662	1	1	0	0	1	hsa-miR-1178-3p	-0.55	-0.55	N/A
ZSCAN18	ENST00000240727.6	zinc finger and SCAN domain containing 18	838	2	1	0	1	0	hsa-miR-1178-3p	-0.55	-0.59	N/A
MREG	ENST00000263268.6	melanoregulin	95	1	1	0	0	0	hsa-miR-1178-3p	-0.55	-0.55	N/A
KCNG1	ENST00000396017.3	potassium voltage-gated channel, subfamily G, member 1	76	2	0	2	0	1	hsa-miR-1178-3p	-0.54	-0.61	N/A
CDK4	ENST00000312990.6	cyclin-dependent kinase 4	290	1	1	0	0	0	hsa-miR-1178-3p	-0.54	-0.59	N/A
THAP10	ENST00000249861.4	THAP domain containing 10	22	2	0	2	0	0	hsa-miR-1178-3p	-0.54	-0.54	N/A
C3orf35	ENST00000426078.1	chromosome 3 open reading frame 35	14	2	0	2	0	0	hsa-miR-1178-3p	-0.54	-0.54	N/A
RP6-24A23.6	ENST00000563887.1	Uncharacterized protein	937	2	0	2	0	1	hsa-miR-1178-3p	-0.53	-0.62	N/A
TFRC	ENST00000540528.1	transferrin receptor	296	1	1	0	0	0	hsa-miR-1178-3p	-0.53	-0.53	N/A
CTB-167G5.5	ENST00000600193.1	Uncharacterized protein	5	1	1	0	0	0	hsa-miR-1178-3p	-0.53	-0.53	N/A
CXCL6	ENST00000226317.5	chemokine (C-X-C motif) ligand 6	26	1	1	0	0	0	hsa-miR-1178-3p	-0.53	-0.53	N/A
AC093677.1	ENST00000600169.1	Uncharacterized protein	2	1	1	0	0	0	hsa-miR-1178-3p	-0.53	-0.53	N/A
SLC25A45	ENST00000527174.1	solute carrier family 25, member 45	67	2	1	0	1	2	hsa-miR-1178-3p	-0.52	-0.66	N/A
NAT8L	ENST00000331662.3	N-acetyltransferase 8-like (GCN5-related, putative)	220	5	0	5	0	3	hsa-miR-1178-3p	-0.52	-0.57	N/A
SRPR	ENST00000332118.6	signal recognition particle receptor (docking protein)	2980	2	1	0	1	0	hsa-miR-1178-3p	-0.52	-0.52	N/A
OCLN	ENST00000355237.2	occludin	5	2	1	1	0	1	hsa-miR-1178-3p	-0.51	-0.51	N/A
C10orf128	ENST00000374151.3	chromosome 10 open reading frame 128	0	3	0	2	1	0	hsa-miR-1178-3p	-0.51	-0.51	N/A
TGFA	ENST00000295400.6	transforming growth factor, alpha	36	1	1	0	0	1	hsa-miR-1178-3p	-0.51	-0.51	N/A
RP11-514O12.4	ENST00000507747.1		15	1	0	1	0	0	hsa-miR-1178-3p	-0.51	-0.51	N/A
NEU3	ENST00000532963.1	sialidase 3 (membrane sialidase)	243	3	0	2	1	0	hsa-miR-1178-3p	-0.51	-0.51	N/A
DNAH6	ENST00000389394.3	dynein, axonemal, heavy chain 6	13	1	1	0	0	0	hsa-miR-1178-3p	-0.5	-0.5	N/A
C2orf69	ENST00000319974.5	chromosome 2 open reading frame 69	82	3	0	2	1	1	hsa-miR-1178-3p	-0.5	-0.56	N/A
C2orf57	ENST00000313965.2	chromosome 2 open reading frame 57	5	1	0	1	0	0	hsa-miR-1178-3p	-0.49	-0.49	N/A
XK	ENST00000378616.3	X-linked Kx blood group (McLeod syndrome)	39	2	1	1	0	0	hsa-miR-1178-3p	-0.49	-0.49	N/A
EIF1B	ENST00000232905.3	eukaryotic translation initiation factor 1B	1106	1	1	0	0	0	hsa-miR-1178-3p	-0.48	-0.76	N/A
ATP1B1	ENST00000367816.1	ATPase, Na+/K+ transporting, beta 1 polypeptide	656	1	1	0	0	1	hsa-miR-1178-3p	-0.48	-0.5	N/A
MRAP2	ENST00000257776.4	melanocortin 2 receptor accessory protein 2	25	1	1	0	0	0	hsa-miR-1178-3p	-0.48	-0.48	N/A
CLEC4A	ENST00000229332.5	C-type lectin domain family 4, member A	21	1	0	1	0	1	hsa-miR-1178-3p	-0.48	-0.48	N/A
ASPHD1	ENST00000483405.1	aspartate beta-hydroxylase domain containing 1	108	1	0	1	0	0	hsa-miR-1178-3p	-0.48	-0.48	N/A
LMCD1	ENST00000157600.3	LIM and cysteine-rich domains 1	1023	3*	1	1	0	0	hsa-miR-1178-3p	-0.48	-0.66	N/A
CYP4B1	ENST00000271153.4	cytochrome P450, family 4, subfamily B, polypeptide 1	5	2	0	2	0	0	hsa-miR-1178-3p	-0.48	-0.48	N/A
SCRG1	ENST00000296506.3	stimulator of chondrogenesis 1	5	1	1	0	0	1	hsa-miR-1178-3p	-0.47	-0.47	N/A
HSCB	ENST00000398941.2	HscB mitochondrial iron-sulfur cluster co-chaperone	102	2	0	2	0	0	hsa-miR-1178-3p	-0.47	-0.68	N/A
CASP3	ENST00000393585.2	caspase 3, apoptosis-related cysteine peptidase	43	1	1	0	0	2	hsa-miR-1178-3p	-0.47	-0.47	N/A
AC093802.1	ENST00000407524.1	Uncharacterized protein	5	2	1	0	1	0	hsa-miR-1178-3p	-0.47	-0.47	N/A
FP15737	ENST00000399967.3		67	1	1	0	0	1	hsa-miR-1178-3p	-0.47	-0.47	N/A
ST8SIA4	ENST00000231461.5	ST8 alpha-N-acetyl-neuraminide alpha-2,8-sialyltransferase 4	5	2	1	0	1	0	hsa-miR-1178-3p	-0.47	-0.47	N/A
MRGPRF	ENST00000441623.1	MAS-related GPR, member F	140	1	1	0	0	1	hsa-miR-1178-3p	-0.47	-0.47	N/A
VKORC1L1	ENST00000360768.3	vitamin K epoxide reductase complex, subunit 1-like 1	2291	1	1	0	0	0	hsa-miR-1178-3p	-0.46	-0.46	N/A
RAB15	ENST00000436278.2	RAB15, member RAS oncogene family	23	2	0	2	0	0	hsa-miR-1178-3p	-0.46	-0.52	N/A
SSR3	ENST00000476217.1	signal sequence receptor, gamma (translocon-associated protein gamma)	6034	2	2	0	0	1	hsa-miR-1178-3p	-0.46	-0.83	N/A
CHST14	ENST00000306243.5	carbohydrate (N-acetylgalactosamine 4-0) sulfotransferase 14	1143	2	2	0	0	0	hsa-miR-1178-3p	-0.46	-0.74	N/A
POC1B	ENST00000378528.2	POC1 centriolar protein B	61	1	1	0	0	0	hsa-miR-1178-3p	-0.46	-0.46	N/A
ZNF488	ENST00000494156.1	zinc finger protein 488	61	1	1	0	0	2	hsa-miR-1178-3p	-0.46	-0.46	N/A
PCDHB10	ENST00000239446.4	protocadherin beta 10	13	1	1	0	0	0	hsa-miR-1178-3p	-0.45	-0.45	N/A
SPTLC1	ENST00000262554.2	serine palmitoyltransferase, long chain base subunit 1	2578	1	1	0	0	1	hsa-miR-1178-3p	-0.45	-0.45	N/A
C14orf1	ENST00000256319.6	chromosome 14 open reading frame 1	4423	1	1	0	0	0	hsa-miR-1178-3p	-0.45	-0.45	N/A
ZMAT4	ENST00000315769.7	zinc finger, matrin-type 4	5	1	1	0	0	1	hsa-miR-1178-3p	-0.45	-0.45	N/A
MRPS16	ENST00000372945.3	mitochondrial ribosomal protein S16	3942	2	0	1	1	0	hsa-miR-1178-3p	-0.45	-0.63	N/A
NDUFS6	ENST00000274137.5	NADH dehydrogenase (ubiquinone) Fe-S protein 6, 13kDa (NADH-coenzyme Q reductase)	30270	1	0	1	0	1	hsa-miR-1178-3p	-0.44	-0.44	N/A
KRTAP5-11	ENST00000398530.1	keratin associated protein 5-11	5	1	1	0	0	0	hsa-miR-1178-3p	-0.44	-0.44	N/A
INADL	ENST00000371158.2	InaD-like (Drosophila)	96	3	1	0	2	0	hsa-miR-1178-3p	-0.44	-0.44	N/A
CABP4	ENST00000438189.2	calcium binding protein 4	5	2	1	0	1	0	hsa-miR-1178-3p	-0.43	-0.46	N/A
UCMA	ENST00000378681.3	upper zone of growth plate and cartilage matrix associated	5	1	1	0	0	0	hsa-miR-1178-3p	-0.43	-0.43	N/A
KIAA1324L	ENST00000450689.2	KIAA1324-like	181	2	1	1	0	2	hsa-miR-1178-3p	-0.43	-0.54	N/A
VTCN1	ENST00000359008.4	V-set domain containing T cell activation inhibitor 1	5	1	1	0	0	1	hsa-miR-1178-3p	-0.43	-0.43	N/A
TMEM184B	ENST00000361906.3	transmembrane protein 184B	1362	1	1	0	0	0	hsa-miR-1178-3p	-0.43	-0.44	N/A
ART4	ENST00000228936.4	ADP-ribosyltransferase 4	5	3	0	2	1	1	hsa-miR-1178-3p	-0.42	-0.42	N/A
RP5-1052I5.2	ENST00000370548.2	Heparan sulfate 2-O-sulfotransferase 1	21	1	1	0	0	0	hsa-miR-1178-3p	-0.42	-0.42	N/A
PSMB7	ENST00000259457.3	proteasome (prosome, macropain) subunit, beta type, 7	475	2	0	2	0	1	hsa-miR-1178-3p	-0.42	-0.65	N/A
GNAS	ENST00000371075.3	GNAS complex locus	314	2	1	0	1	1	hsa-miR-1178-3p	-0.42	-0.74	N/A
FAM106A	ENST00000392176.3	family with sequence similarity 106, member A	5	1	1	0	0	0	hsa-miR-1178-3p	-0.42	-0.42	N/A
CCDC146	ENST00000285871.4	coiled-coil domain containing 146	24	1	0	1	0	0	hsa-miR-1178-3p	-0.41	-0.41	N/A
TMPRSS11E	ENST00000305363.4	transmembrane protease, serine 11E	5	1	1	0	0	0	hsa-miR-1178-3p	-0.41	-0.41	N/A
ATP5E	ENST00000243997.3	ATP synthase, H+ transporting, mitochondrial F1 complex, epsilon subunit	575	4	1	1	2	0	hsa-miR-1178-3p	-0.41	-0.82	N/A
DNAJC6	ENST00000395325.3	DnaJ (Hsp40) homolog, subfamily C, member 6	96	3	0	1	2	1	hsa-miR-1178-3p	-0.41	-0.52	N/A
NPTN	ENST00000345330.4	neuroplastin	2918	1	1	0	0	0	hsa-miR-1178-3p	-0.41	-0.41	N/A
ELK4	ENST00000357992.4	ELK4, ETS-domain protein (SRF accessory protein 1)	39	2	1	0	1	1	hsa-miR-1178-3p	-0.41	-0.42	N/A
HERPUD1	ENST00000379792.2	homocysteine-inducible, endoplasmic reticulum stress-inducible, ubiquitin-like domain member 1	804	1	1	0	0	0	hsa-miR-1178-3p	-0.41	-0.41	N/A
GSAP	ENST00000257626.7	gamma-secretase activating protein	5	1	1	0	0	0	hsa-miR-1178-3p	-0.4	-0.4	N/A
DCLRE1B	ENST00000369563.3	DNA cross-link repair 1B	687	2	1	0	1	0	hsa-miR-1178-3p	-0.4	-0.41	N/A
TSPYL4	ENST00000420283.1	TSPY-like 4	5	2	2	0	0	0	hsa-miR-1178-3p	-0.4	-0.4	N/A
DLX4	ENST00000240306.3	distal-less homeobox 4	74	1	1	0	0	0	hsa-miR-1178-3p	-0.4	-0.4	N/A
ZNF226	ENST00000588883.1	zinc finger protein 226	327	1	0	1	0	3	hsa-miR-1178-3p	-0.39	-0.41	N/A
SNCA	ENST00000394989.2	synuclein, alpha (non A4 component of amyloid precursor)	476	1	0	1	0	1	hsa-miR-1178-3p	-0.39	-0.43	N/A
AP5S1	ENST00000379573.2	adaptor-related protein complex 5, sigma 1 subunit	492	2	0	1	1	3	hsa-miR-1178-3p	-0.39	-0.49	N/A
SEPHS1	ENST00000545675.1	selenophosphate synthetase 1	281	2	2	0	0	1	hsa-miR-1178-3p	-0.39	-0.69	N/A
CMPK1	ENST00000371873.5	cytidine monophosphate (UMP-CMP) kinase 1, cytosolic	4366	1	1	0	0	0	hsa-miR-1178-3p	-0.39	-0.39	N/A
SLC45A3	ENST00000367145.3	solute carrier family 45, member 3	17	1	1	0	0	0	hsa-miR-1178-3p	-0.39	-0.39	N/A
NKG7	ENST00000595217.1	natural killer cell group 7 sequence	5	1	0	1	0	0	hsa-miR-1178-3p	-0.39	-0.39	N/A
C22orf39	ENST00000399562.4	chromosome 22 open reading frame 39	360	2	0	2	0	1	hsa-miR-1178-3p	-0.39	-0.43	N/A
MANBAL	ENST00000397150.1	mannosidase, beta A, lysosomal-like	2819	1	0	1	0	0	hsa-miR-1178-3p	-0.38	-0.39	N/A
FSCN3	ENST00000265825.5	fascin homolog 3, actin-bundling protein, testicular (Strongylocentrotus purpuratus)	5	1	0	1	0	1	hsa-miR-1178-3p	-0.38	-0.38	N/A
NSUN7	ENST00000316607.5	NOP2/Sun domain family, member 7	9	1	1	0	0	1	hsa-miR-1178-3p	-0.38	-0.38	N/A
ZNF701	ENST00000540331.1	zinc finger protein 701	15	2	1	1	0	0	hsa-miR-1178-3p	-0.38	-0.38	N/A
CLIC6	ENST00000360731.3	chloride intracellular channel 6	16	1	1	0	0	0	hsa-miR-1178-3p	-0.38	-0.38	N/A
ZZZ3	ENST00000370801.3	zinc finger, ZZ-type containing 3	338	2	2	0	0	3	hsa-miR-1178-3p	-0.38	-0.4	N/A
ZNF780B	ENST00000434248.1	zinc finger protein 780B	77	2	2	0	0	1	hsa-miR-1178-3p	-0.38	-0.38	N/A
STON2	ENST00000267540.2	stonin 2	40	3	0	1	2	0	hsa-miR-1178-3p	-0.38	-0.48	N/A
HMGA1	ENST00000347617.6	high mobility group AT-hook 1	2024	1	1	0	0	0	hsa-miR-1178-3p	-0.38	-0.38	N/A
MAEA	ENST00000303400.4	macrophage erythroblast attacher	5906	1	1	0	0	0	hsa-miR-1178-3p	-0.38	-0.38	N/A
MOB3C	ENST00000319928.3	MOB kinase activator 3C	141	3	0	2	1	0	hsa-miR-1178-3p	-0.37	-0.37	N/A
DLG1	ENST00000346964.2	discs, large homolog 1 (Drosophila)	813	3	1	0	2	0	hsa-miR-1178-3p	-0.37	-0.4	N/A
AP000867.1	ENST00000343767.3		5	1	1	0	0	0	hsa-miR-1178-3p	-0.37	-0.37	N/A
OSBPL11	ENST00000296220.5	oxysterol binding protein-like 11	101	1	1	0	0	2	hsa-miR-1178-3p	-0.37	-0.37	N/A
PKD1L2	ENST00000531391.1	polycystic kidney disease 1-like 2	7	1	1	0	0	0	hsa-miR-1178-3p	-0.37	-0.37	N/A
TFR2	ENST00000431692.1	transferrin receptor 2	330	1	1	0	0	0	hsa-miR-1178-3p	-0.37	-0.37	N/A
TSPAN4	ENST00000397396.1	tetraspanin 4	3943	1	0	1	0	0	hsa-miR-1178-3p	-0.37	-0.37	N/A
C1orf216	ENST00000270815.4	chromosome 1 open reading frame 216	203	2	0	2	0	1	hsa-miR-1178-3p	-0.37	-0.37	N/A
POU3F2	ENST00000328345.5	POU class 3 homeobox 2	274	1	1	0	0	1	hsa-miR-1178-3p	-0.37	-0.38	N/A
LRRC27	ENST00000392638.2	leucine rich repeat containing 27	68	3	1	2	0	1	hsa-miR-1178-3p	-0.36	-0.69	N/A
CSNK1G1	ENST00000303052.7	casein kinase 1, gamma 1	149	3	2	0	1	1	hsa-miR-1178-3p	-0.36	-0.36	N/A
SOCS5	ENST00000306503.5	suppressor of cytokine signaling 5	72	1	1	0	0	0	hsa-miR-1178-3p	-0.36	-0.36	N/A
URM1	ENST00000372850.1	ubiquitin related modifier 1	345	2	0	2	0	0	hsa-miR-1178-3p	-0.36	-0.37	N/A
SREK1	ENST00000334121.6	splicing regulatory glutamine/lysine-rich protein 1	316	1	0	1	0	1	hsa-miR-1178-3p	-0.36	-0.39	N/A
TBC1D7	ENST00000356436.4	TBC1 domain family, member 7	236	1	0	1	0	0	hsa-miR-1178-3p	-0.36	-0.36	N/A
PRRG1	ENST00000378628.4	proline rich Gla (G-carboxyglutamic acid) 1	1122	2	1	0	1	0	hsa-miR-1178-3p	-0.36	-0.36	N/A
FAM98A	ENST00000403368.1	family with sequence similarity 98, member A	89	1	1	0	0	0	hsa-miR-1178-3p	-0.36	-0.36	N/A
CBR1	ENST00000530908.1	carbonyl reductase 1	113	2	0	1	1	0	hsa-miR-1178-3p	-0.36	-0.36	N/A
CD33	ENST00000262262.4	CD33 molecule	5	1	0	1	0	0	hsa-miR-1178-3p	-0.36	-0.36	N/A
P2RX2	ENST00000389110.3	purinergic receptor P2X, ligand-gated ion channel, 2	5	1	0	1	0	0	hsa-miR-1178-3p	-0.36	-0.36	N/A
MED11	ENST00000575284.1	mediator complex subunit 11	9	1	0	1	0	1	hsa-miR-1178-3p	-0.35	-0.35	N/A
C9orf78	ENST00000372447.3	chromosome 9 open reading frame 78	1483	1	0	1	0	0	hsa-miR-1178-3p	-0.35	-0.35	N/A
PROL1	ENST00000399575.2	proline rich, lacrimal 1	5	1	0	0	1	0	hsa-miR-1178-3p	-0.35	-0.35	N/A
TMED3	ENST00000299705.5	transmembrane emp24 protein transport domain containing 3	12499	1	1	0	0	0	hsa-miR-1178-3p	-0.35	-0.35	N/A
LEMD3	ENST00000308330.2	LEM domain containing 3	189	1	1	0	0	0	hsa-miR-1178-3p	-0.35	-0.35	N/A
GPAM	ENST00000348367.4	glycerol-3-phosphate acyltransferase, mitochondrial	153	2	1	1	0	0	hsa-miR-1178-3p	-0.35	-0.36	N/A
NTSR2	ENST00000306928.5	neurotensin receptor 2	5	1	1	0	0	0	hsa-miR-1178-3p	-0.35	-0.35	N/A
RPTN	ENST00000316073.3	repetin	5	2	0	1	1	1	hsa-miR-1178-3p	-0.35	-0.35	N/A
HIST1H2AK	ENST00000330180.2	histone cluster 1, H2ak	26	1	1	0	0	1	hsa-miR-1178-3p	-0.35	-0.45	N/A
DOK6	ENST00000382713.5	docking protein 6	8	3*	0	1	1	2	hsa-miR-1178-3p	-0.35	-0.35	N/A
DAW1	ENST00000373666.2	dynein assembly factor with WDR repeat domains 1	82	1	1	0	0	0	hsa-miR-1178-3p	-0.35	-0.35	N/A
PLAC1	ENST00000359237.4	placenta-specific 1	5	1	0	1	0	0	hsa-miR-1178-3p	-0.35	-0.35	N/A
FAM213A	ENST00000372187.5	family with sequence similarity 213, member A	482	3	2	0	1	0	hsa-miR-1178-3p	-0.35	-0.51	N/A
STXBP4	ENST00000376352.2	syntaxin binding protein 4	62	2	1	1	0	4	hsa-miR-1178-3p	-0.35	-0.42	N/A
MAGI2	ENST00000419488.1	membrane associated guanylate kinase, WW and PDZ domain containing 2	43	1	1	0	0	0	hsa-miR-1178-3p	-0.35	-0.39	N/A
MAP3K7CL	ENST00000286791.5	MAP3K7 C-terminal like	87	2	0	1	1	1	hsa-miR-1178-3p	-0.35	-0.35	N/A
CHRNB4	ENST00000261751.3	cholinergic receptor, nicotinic, beta 4 (neuronal)	5	1	0	1	0	0	hsa-miR-1178-3p	-0.35	-0.35	N/A
SELE	ENST00000367781.4	selectin E	5	1	1	0	0	0	hsa-miR-1178-3p	-0.35	-0.35	N/A
C21orf49	ENST00000382375.4	chromosome 21 open reading frame 49	5	2	0	1	1	0	hsa-miR-1178-3p	-0.34	-0.34	N/A
FAM134C	ENST00000309428.5	family with sequence similarity 134, member C	397	2	1	1	0	0	hsa-miR-1178-3p	-0.34	-0.34	N/A
SULF1	ENST00000458141.2	sulfatase 1	11	3	1	1	1	1	hsa-miR-1178-3p	-0.34	-0.34	N/A
TGM2	ENST00000361475.2	transglutaminase 2	731	1	1	0	0	0	hsa-miR-1178-3p	-0.34	-0.34	N/A
KRT20	ENST00000167588.3	keratin 20	5	1	0	1	0	0	hsa-miR-1178-3p	-0.34	-0.34	N/A
NPTXR	ENST00000333039.2	neuronal pentraxin receptor	578	2	0	2	0	3	hsa-miR-1178-3p	-0.34	-0.34	N/A
CDCA4	ENST00000336219.3	cell division cycle associated 4	194	2	0	2	0	0	hsa-miR-1178-3p	-0.34	-0.39	N/A
TRIB3	ENST00000217233.3	tribbles pseudokinase 3	730	1	1	0	0	1	hsa-miR-1178-3p	-0.34	-0.34	N/A
APBA1	ENST00000265381.4	amyloid beta (A4) precursor protein-binding, family A, member 1	12	2	1	1	0	1	hsa-miR-1178-3p	-0.34	-0.34	N/A
SEC14L3	ENST00000215812.4	SEC14-like 3 (S. cerevisiae)	5	1	1	0	0	0	hsa-miR-1178-3p	-0.34	-0.34	N/A
ZNF385A	ENST00000551109.1	zinc finger protein 385A	94	1	1	0	0	0	hsa-miR-1178-3p	-0.34	-0.34	N/A
CRHR2	ENST00000506074.2	corticotropin releasing hormone receptor 2	5	1	1	0	0	0	hsa-miR-1178-3p	-0.34	-0.34	N/A
GLIPR2	ENST00000396613.3	GLI pathogenesis-related 2	218	1	1	0	0	0	hsa-miR-1178-3p	-0.34	-0.63	N/A
MAT2A	ENST00000306434.3	methionine adenosyltransferase II, alpha	8	1	0	1	0	0	hsa-miR-1178-3p	-0.34	-0.34	N/A
TECRL	ENST00000381210.3	trans-2,3-enoyl-CoA reductase-like	5	2	0	1	1	0	hsa-miR-1178-3p	-0.34	-0.34	N/A
ZIC3	ENST00000287538.5	Zic family member 3	9	1	1	0	0	1	hsa-miR-1178-3p	-0.34	-0.34	N/A
ZDHHC21	ENST00000380916.4	zinc finger, DHHC-type containing 21	196	2	0	1	1	0	hsa-miR-1178-3p	-0.34	-0.4	N/A
NUS1	ENST00000368494.3	nuclear undecaprenyl pyrophosphate synthase 1 homolog (S. cerevisiae)	302	2	0	1	1	0	hsa-miR-1178-3p	-0.34	-0.34	N/A
OTUD1	ENST00000376495.3	OTU domain containing 1	710	1	0	1	0	0	hsa-miR-1178-3p	-0.34	-0.34	N/A
RP11-242G20.1	ENST00000434931.2	Uncharacterized protein	5	1	0	1	0	1	hsa-miR-1178-3p	-0.33	-0.33	N/A
TM4SF1	ENST00000472441.1	transmembrane 4 L six family member 1	1401	1	0	1	0	0	hsa-miR-1178-3p	-0.33	-0.33	N/A
TP63	ENST00000392460.3	tumor protein p63	0	1	1	0	0	1	hsa-miR-1178-3p	-0.33	-0.33	N/A
PELI1	ENST00000358912.4	pellino E3 ubiquitin protein ligase 1	134	2	1	0	1	1	hsa-miR-1178-3p	-0.33	-0.33	N/A
C12orf76	ENST00000546651.2	chromosome 12 open reading frame 76	62	1	0	1	0	0	hsa-miR-1178-3p	-0.33	-0.39	N/A
ATF6	ENST00000367942.3	activating transcription factor 6	382	1	1	0	0	0	hsa-miR-1178-3p	-0.33	-0.33	N/A
CD274	ENST00000381573.4	CD274 molecule	351	2	1	0	1	0	hsa-miR-1178-3p	-0.33	-0.35	N/A
DGKE	ENST00000284061.3	diacylglycerol kinase, epsilon 64kDa	470	2	0	2	0	0	hsa-miR-1178-3p	-0.33	-0.35	N/A
MAP1LC3B2	ENST00000306985.4	microtubule-associated protein 1 light chain 3 beta 2	5	1	0	1	0	0	hsa-miR-1178-3p	-0.33	-0.33	N/A
ZNF778	ENST00000433976.2	zinc finger protein 778	11	15	0	15	0	3	hsa-miR-1178-3p	-0.33	-0.67	N/A
SLC25A30	ENST00000539591.1	solute carrier family 25, member 30	92	1	1	0	0	0	hsa-miR-1178-3p	-0.33	-0.33	N/A
ZNF510	ENST00000375231.1	zinc finger protein 510	40	2	1	1	0	1	hsa-miR-1178-3p	-0.33	-0.33	N/A
DPP3	ENST00000360510.2	dipeptidyl-peptidase 3	189	1	1	0	0	0	hsa-miR-1178-3p	-0.33	-0.33	N/A
EWSR1	ENST00000397938.2	EWS RNA-binding protein 1	8833	1	0	1	0	0	hsa-miR-1178-3p	-0.33	-0.33	N/A
ARL15	ENST00000502271.1	ADP-ribosylation factor-like 15	119	1	0	1	0	1	hsa-miR-1178-3p	-0.33	-0.36	N/A
GLRX5	ENST00000331334.4	glutaredoxin 5	6308	1	0	1	0	1	hsa-miR-1178-3p	-0.33	-0.33	N/A
TAZ	ENST00000299328.5	tafazzin	1269	1	1	0	0	0	hsa-miR-1178-3p	-0.33	-0.33	N/A
C14orf159	ENST00000256324.10	chromosome 14 open reading frame 159	5	2	1	1	0	0	hsa-miR-1178-3p	-0.32	-0.32	N/A
GDF5OS	ENST00000374375.1	growth differentiation factor 5 opposite strand	122	2	0	1	1	1	hsa-miR-1178-3p	-0.32	-0.34	N/A
TMEM182	ENST00000412401.2	transmembrane protein 182	69	1	1	0	0	0	hsa-miR-1178-3p	-0.32	-0.32	N/A
RNF123	ENST00000327697.6	ring finger protein 123	85	1	0	1	0	0	hsa-miR-1178-3p	-0.32	-0.33	N/A
ACSM1	ENST00000307493.4	acyl-CoA synthetase medium-chain family member 1	5	1	0	1	0	0	hsa-miR-1178-3p	-0.32	-0.32	N/A
ADH7	ENST00000437033.2	alcohol dehydrogenase 7 (class IV), mu or sigma polypeptide	5	1	0	1	0	0	hsa-miR-1178-3p	-0.32	-0.32	N/A
C5orf49	ENST00000399810.2	chromosome 5 open reading frame 49	7	1	0	1	0	1	hsa-miR-1178-3p	-0.32	-0.33	N/A
C12orf49	ENST00000261318.3	chromosome 12 open reading frame 49	673	6	2	0	4	0	hsa-miR-1178-3p	-0.32	-0.95	N/A
ROR1	ENST00000371079.1	receptor tyrosine kinase-like orphan receptor 1	80	1	1	0	0	1	hsa-miR-1178-3p	-0.32	-0.32	N/A
CXCL17	ENST00000601181.1	chemokine (C-X-C motif) ligand 17	8	1	0	1	0	0	hsa-miR-1178-3p	-0.32	-0.32	N/A
ZNF569	ENST00000392149.2	zinc finger protein 569	34	1	0	1	0	0	hsa-miR-1178-3p	-0.32	-0.32	N/A
AC011484.1	ENST00000377652.3	Uncharacterized protein; cDNA FLJ42076 fis, clone SYNOV2018921	5	1	1	0	0	0	hsa-miR-1178-3p	-0.32	-0.32	N/A
PNP	ENST00000361505.5	purine nucleoside phosphorylase	50	2	0	1	1	1	hsa-miR-1178-3p	-0.32	-0.34	N/A
PANK3	ENST00000239231.6	pantothenate kinase 3	522	2	0	1	1	3	hsa-miR-1178-3p	-0.32	-0.39	N/A
SEPT11	ENST00000264893.6	septin 11	515	3	1	1	1	1	hsa-miR-1178-3p	-0.32	-0.33	N/A
MAP3K2	ENST00000409947.1	mitogen-activated protein kinase kinase kinase 2	187	3	1	1	1	1	hsa-miR-1178-3p	-0.32	-0.32	N/A
ZNF823	ENST00000440527.1	zinc finger protein 823	7	1	0	1	0	0	hsa-miR-1178-3p	-0.32	-0.48	N/A
ALG13	ENST00000371979.3	ALG13, UDP-N-acetylglucosaminyltransferase subunit	612	2	0	1	1	0	hsa-miR-1178-3p	-0.31	-0.42	N/A
EGR3	ENST00000519492.1	early growth response 3	21	1	1	0	0	0	hsa-miR-1178-3p	-0.31	-0.43	N/A
GINS1	ENST00000429262.2	GINS complex subunit 1 (Psf1 homolog)	56	1	0	1	0	0	hsa-miR-1178-3p	-0.31	-0.31	N/A
MUCL1	ENST00000308796.6	mucin-like 1	5	1	0	0	1	0	hsa-miR-1178-3p	-0.31	-0.31	N/A
PCBD2	ENST00000512783.1	pterin-4 alpha-carbinolamine dehydratase/dimerization cofactor of hepatocyte nuclear factor 1 alpha (TCF1) 2	95	1	0	1	0	3	hsa-miR-1178-3p	-0.31	-0.31	N/A
MICU1	ENST00000361114.5	mitochondrial calcium uptake 1	325	1	1	0	0	0	hsa-miR-1178-3p	-0.31	-0.33	N/A
FBXO28	ENST00000424254.2	F-box protein 28	461	2	1	0	1	0	hsa-miR-1178-3p	-0.31	-0.33	N/A
REST	ENST00000309042.7	RE1-silencing transcription factor	31	1	1	0	0	0	hsa-miR-1178-3p	-0.31	-0.36	N/A
ABCA13	ENST00000544596.1	ATP-binding cassette, sub-family A (ABC1), member 13	5	1	1	0	0	0	hsa-miR-1178-3p	-0.31	-0.31	N/A
ZNF579	ENST00000325421.4	zinc finger protein 579	1080	1	1	0	0	0	hsa-miR-1178-3p	-0.31	-0.31	N/A
TDGF1	ENST00000296145.5	teratocarcinoma-derived growth factor 1	5	1	1	0	0	0	hsa-miR-1178-3p	-0.31	-0.31	N/A
CDRT4	ENST00000312177.6	CMT1A duplicated region transcript 4	109	1	1	0	0	0	hsa-miR-1178-3p	-0.31	-0.31	N/A
CXorf48	ENST00000344129.2	chromosome X open reading frame 48	5	1	0	0	1	2	hsa-miR-1178-3p	-0.31	-0.31	N/A
EDAR	ENST00000409271.1	ectodysplasin A receptor	7	1	1	0	0	0	hsa-miR-1178-3p	-0.31	-0.31	N/A
G3BP2	ENST00000395719.3	GTPase activating protein (SH3 domain) binding protein 2	4413	1	1	0	0	0	hsa-miR-1178-3p	-0.31	-0.32	N/A
STC1	ENST00000290271.2	stanniocalcin 1	2932	1	0	1	0	0	hsa-miR-1178-3p	-0.31	-0.32	N/A
ZNF311	ENST00000377179.3	zinc finger protein 311	9	1	0	1	0	0	hsa-miR-1178-3p	-0.31	-0.31	N/A
KLF3	ENST00000261438.5	Kruppel-like factor 3 (basic)	515	1	1	0	0	1	hsa-miR-1178-3p	-0.31	-0.37	N/A
AC135983.2	ENST00000593303.1	Protein LOC100996413	5	2	0	2	0	0	hsa-miR-1178-3p	-0.31	-0.31	N/A
C12orf39	ENST00000256969.2	chromosome 12 open reading frame 39	65	1	0	1	0	0	hsa-miR-1178-3p	-0.31	-0.39	N/A
PAF1	ENST00000221265.3	Paf1, RNA polymerase II associated factor, homolog (S. cerevisiae)	490	1	0	1	0	0	hsa-miR-1178-3p	-0.3	-0.3	N/A
HRNR	ENST00000368801.2	hornerin	5	1	1	0	0	0	hsa-miR-1178-3p	-0.3	-0.3	N/A
LINC00923	ENST00000503874.3	long intergenic non-protein coding RNA 923	5	1	0	1	0	0	hsa-miR-1178-3p	-0.3	-0.3	N/A
STUB1	ENST00000219548.4	STIP1 homology and U-box containing protein 1, E3 ubiquitin protein ligase	1084	1	0	1	0	0	hsa-miR-1178-3p	-0.3	-0.31	N/A
NXPE1	ENST00000536312.1	neurexophilin and PC-esterase domain family, member 1	5	1	0	1	0	0	hsa-miR-1178-3p	-0.3	-0.3	N/A
NSUN5	ENST00000428206.1	NOP2/Sun domain family, member 5	28	1	1	0	0	0	hsa-miR-1178-3p	-0.3	-0.36	N/A
MEX3B	ENST00000558133.1	mex-3 RNA binding family member B	1401	2	0	1	1	0	hsa-miR-1178-3p	-0.3	-0.3	N/A
MAGEB1	ENST00000378981.3	melanoma antigen family B, 1	5	1	0	1	0	0	hsa-miR-1178-3p	-0.3	-0.3	N/A
FIZ1	ENST00000221665.3	FLT3-interacting zinc finger 1	136	1	1	0	0	0	hsa-miR-1178-3p	-0.3	-0.3	N/A
STON1	ENST00000309835.3	stonin 1	254	1	1	0	0	1	hsa-miR-1178-3p	-0.3	-0.31	N/A
C3AR1	ENST00000307637.4	complement component 3a receptor 1	5	1	0	1	0	0	hsa-miR-1178-3p	-0.3	-0.3	N/A
SMIM5	ENST00000375215.3	small integral membrane protein 5	5	1	0	1	0	0	hsa-miR-1178-3p	-0.3	-0.3	N/A
CCR5	ENST00000292303.4	chemokine (C-C motif) receptor 5 (gene/pseudogene)	5	3	0	1	2	2	hsa-miR-1178-3p	-0.3	-0.3	N/A
TBX15	ENST00000207157.3	T-box 15	14	1	1	0	0	1	hsa-miR-1178-3p	-0.3	-0.3	N/A
PGK1	ENST00000373316.4	phosphoglycerate kinase 1	7680	1	0	1	0	0	hsa-miR-1178-3p	-0.3	-0.3	N/A
NUDT21	ENST00000300291.5	nudix (nucleoside diphosphate linked moiety X)-type motif 21	629	3	0	2	1	0	hsa-miR-1178-3p	-0.3	-0.36	N/A
SURF4	ENST00000545297.1	surfeit 4	3667	3	0	2	1	1	hsa-miR-1178-3p	-0.3	-0.37	N/A
TMPRSS4	ENST00000534111.1	transmembrane protease, serine 4	5	2	1	1	0	0	hsa-miR-1178-3p	-0.3	-0.3	N/A
IMP4	ENST00000409935.1	IMP4, U3 small nucleolar ribonucleoprotein, homolog (yeast)	955	2	0	2	0	3	hsa-miR-1178-3p	-0.3	-0.51	N/A
NEK3	ENST00000339406.3	NIMA-related kinase 3	66	1	0	1	0	0	hsa-miR-1178-3p	-0.3	-0.3	N/A
SEC22A	ENST00000481965.2	SEC22 vesicle trafficking protein homolog A (S. cerevisiae)	294	1	0	1	0	0	hsa-miR-1178-3p	-0.3	-0.3	N/A
CNGB3	ENST00000320005.5	cyclic nucleotide gated channel beta 3	5	1	1	0	0	0	hsa-miR-1178-3p	-0.3	-0.3	N/A
FAM219B	ENST00000357635.5	family with sequence similarity 219, member B	270	2	0	1	1	1	hsa-miR-1178-3p	-0.3	-0.32	N/A
ORC5	ENST00000297431.4	origin recognition complex, subunit 5	407	1	0	1	0	1	hsa-miR-1178-3p	-0.29	-0.29	N/A
TOMM40L	ENST00000367987.1	translocase of outer mitochondrial membrane 40 homolog (yeast)-like	13	1	0	1	0	0	hsa-miR-1178-3p	-0.29	-0.29	N/A
GDA	ENST00000358399.3	guanine deaminase	5	2	0	1	1	2	hsa-miR-1178-3p	-0.29	-0.29	N/A
LINS	ENST00000561308.1	lines homolog (Drosophila)	18	1	1	0	0	0	hsa-miR-1178-3p	-0.29	-0.43	N/A
TMEM106A	ENST00000331615.3	transmembrane protein 106A	22	1	0	1	0	2	hsa-miR-1178-3p	-0.29	-0.29	N/A
FANCI	ENST00000300027.8	Fanconi anemia, complementation group I	1706	1	1	0	0	0	hsa-miR-1178-3p	-0.29	-0.34	N/A
RAB13	ENST00000368575.3	RAB13, member RAS oncogene family	26	2	0	2	0	2	hsa-miR-1178-3p	-0.29	-0.46	N/A
CCDC102B	ENST00000319445.6	coiled-coil domain containing 102B	5	1	0	1	0	0	hsa-miR-1178-3p	-0.29	-0.29	N/A
ZNF713	ENST00000429591.2	zinc finger protein 713	5	1	1	0	0	0	hsa-miR-1178-3p	-0.29	-0.29	N/A
PIGQ	ENST00000321878.5	phosphatidylinositol glycan anchor biosynthesis, class Q	342	2	0	2	0	0	hsa-miR-1178-3p	-0.29	-0.29	N/A
E2F1	ENST00000343380.5	E2F transcription factor 1	479	3	0	1	2	0	hsa-miR-1178-3p	-0.29	-0.29	N/A
MTRNR2L12	ENST00000600213.2	MT-RNR2-like 12 (pseudogene)	5	1	0	0	1	0	hsa-miR-1178-3p	-0.29	-0.29	N/A
CRYBG3	ENST00000389622.2	beta-gamma crystallin domain containing 3	46	1	1	0	0	1	hsa-miR-1178-3p	-0.29	-0.29	N/A
TM6SF1	ENST00000379390.6	transmembrane 6 superfamily member 1	211	1	0	1	0	0	hsa-miR-1178-3p	-0.29	-0.32	N/A
OR7D2	ENST00000344248.2	olfactory receptor, family 7, subfamily D, member 2	5	1	0	1	0	0	hsa-miR-1178-3p	-0.29	-0.29	N/A
FAM199X	ENST00000493442.1	family with sequence similarity 199, X-linked	856	1	0	1	0	1	hsa-miR-1178-3p	-0.29	-0.29	N/A
CIAPIN1	ENST00000565961.1	cytokine induced apoptosis inhibitor 1	423	1	0	1	0	2	hsa-miR-1178-3p	-0.29	-0.29	N/A
IDI1	ENST00000381344.3	isopentenyl-diphosphate delta isomerase 1	827	2	0	2	0	0	hsa-miR-1178-3p	-0.29	-0.32	N/A
HLA-DOA	ENST00000229829.5	major histocompatibility complex, class II, DO alpha	7	2	0	1	1	0	hsa-miR-1178-3p	-0.29	-0.29	N/A
AFF4	ENST00000265343.5	AF4/FMR2 family, member 4	2755	2	1	1	0	2	hsa-miR-1178-3p	-0.29	-0.3	N/A
LMO4	ENST00000370544.5	LIM domain only 4	294	2	1	1	0	1	hsa-miR-1178-3p	-0.29	-0.54	N/A
CNOT6L	ENST00000504123.1	CCR4-NOT transcription complex, subunit 6-like	23	1	1	0	0	0	hsa-miR-1178-3p	-0.29	-0.29	N/A
LAIR2	ENST00000301202.2	leukocyte-associated immunoglobulin-like receptor 2	5	1	0	0	1	0	hsa-miR-1178-3p	-0.29	-0.29	N/A
SREK1IP1	ENST00000513458.4	SREK1-interacting protein 1	145	3	0	2	1	0	hsa-miR-1178-3p	-0.29	-0.39	N/A
RAET1L	ENST00000367341.1	retinoic acid early transcript 1L	5	1	0	1	0	0	hsa-miR-1178-3p	-0.29	-0.29	N/A
ZNF346	ENST00000503039.1	zinc finger protein 346	5	1	1	0	0	1	hsa-miR-1178-3p	-0.28	-0.28	N/A
VCAM1	ENST00000347652.2	vascular cell adhesion molecule 1	33	1	1	0	0	1	hsa-miR-1178-3p	-0.28	-0.28	N/A
WIPI1	ENST00000262139.5	WD repeat domain, phosphoinositide interacting 1	154	1	0	1	0	0	hsa-miR-1178-3p	-0.28	-0.28	N/A
C9orf41	ENST00000376834.3	chromosome 9 open reading frame 41	248	1	1	0	0	1	hsa-miR-1178-3p	-0.28	-0.32	N/A
POC1B-GALNT4	ENST00000547474.1	POC1B-GALNT4 readthrough	275	2	0	0	2	2	hsa-miR-1178-3p	-0.28	-0.29	N/A
MAPKAPK2	ENST00000294981.4	mitogen-activated protein kinase-activated protein kinase 2	178	1	1	0	0	0	hsa-miR-1178-3p	-0.28	-0.29	N/A
PRMT3	ENST00000331079.6	protein arginine methyltransferase 3	120	2	0	2	0	0	hsa-miR-1178-3p	-0.28	-0.39	N/A
MYZAP	ENST00000267853.5	myocardial zonula adherens protein	10	1	0	1	0	0	hsa-miR-1178-3p	-0.28	-0.28	N/A
DCTN5	ENST00000300087.2	dynactin 5 (p25)	764	4	0	2	2	0	hsa-miR-1178-3p	-0.28	-0.37	N/A
TTL	ENST00000233336.6	tubulin tyrosine ligase	442	4	0	3	1	2	hsa-miR-1178-3p	-0.28	-0.31	N/A
FAM83A	ENST00000518448.1	family with sequence similarity 83, member A	22	1	1	0	0	3	hsa-miR-1178-3p	-0.28	-0.38	N/A
RRP1B	ENST00000340648.4	ribosomal RNA processing 1B	314	1	1	0	0	1	hsa-miR-1178-3p	-0.28	-0.29	N/A
MBLAC2	ENST00000316610.6	metallo-beta-lactamase domain containing 2	498	1	0	1	0	0	hsa-miR-1178-3p	-0.28	-0.28	N/A
NR2F1	ENST00000327111.3	nuclear receptor subfamily 2, group F, member 1	26	1	0	1	0	0	hsa-miR-1178-3p	-0.28	-0.28	N/A
ANTXR1	ENST00000409829.3	anthrax toxin receptor 1	571	2	0	2	0	0	hsa-miR-1178-3p	-0.28	-0.3	N/A
TP53I11	ENST00000395648.3	tumor protein p53 inducible protein 11	90	1	1	0	0	0	hsa-miR-1178-3p	-0.28	-0.28	N/A
WNT5A	ENST00000474267.1	wingless-type MMTV integration site family, member 5A	2080	1	1	0	0	1	hsa-miR-1178-3p	-0.28	-0.28	N/A
NRG1	ENST00000341377.5	neuregulin 1	113	2	0	1	1	0	hsa-miR-1178-3p	-0.28	-0.28	N/A
TPM3	ENST00000368531.2	tropomyosin 3	669	2	0	1	1	1	hsa-miR-1178-3p	-0.28	-0.29	N/A
CTSH	ENST00000220166.5	cathepsin H	1101	1	0	1	0	0	hsa-miR-1178-3p	-0.28	-0.28	N/A
C3orf56	ENST00000398112.1	chromosome 3 open reading frame 56	5	1	0	1	0	0	hsa-miR-1178-3p	-0.28	-0.28	N/A
MESP1	ENST00000300057.4	mesoderm posterior 1 homolog (mouse)	303	1	0	1	0	0	hsa-miR-1178-3p	-0.28	-0.28	N/A
TIPARP	ENST00000295924.7	TCDD-inducible poly(ADP-ribose) polymerase	166	1	1	0	0	0	hsa-miR-1178-3p	-0.28	-0.28	N/A
PTS	ENST00000525803.1	6-pyruvoyltetrahydropterin synthase	1526	1	0	1	0	0	hsa-miR-1178-3p	-0.28	-0.28	N/A
PPP2R1A	ENST00000322088.6	protein phosphatase 2, regulatory subunit A, alpha	65937	1	0	1	0	1	hsa-miR-1178-3p	-0.28	-0.28	N/A
ZXDC	ENST00000389709.3	ZXD family zinc finger C	83	1	1	0	0	0	hsa-miR-1178-3p	-0.28	-0.28	N/A
RP11-105C20.2	ENST00000564533.1	Uncharacterized protein	5	1	0	0	1	0	hsa-miR-1178-3p	-0.28	-0.28	N/A
FAM24B	ENST00000368898.3	family with sequence similarity 24, member B	23	1	0	0	1	0	hsa-miR-1178-3p	-0.28	-0.28	N/A
CALD1	ENST00000361388.2	caldesmon 1	1013	1	1	0	0	1	hsa-miR-1178-3p	-0.28	-0.35	N/A
PER2	ENST00000254658.3	period circadian clock 2	106	1	0	1	0	0	hsa-miR-1178-3p	-0.28	-0.28	N/A
CCDC43	ENST00000457422.2	coiled-coil domain containing 43	36	1	0	1	0	0	hsa-miR-1178-3p	-0.28	-0.28	N/A
FAM24A	ENST00000368894.1	family with sequence similarity 24, member A	5	1	0	0	1	0	hsa-miR-1178-3p	-0.28	-0.28	N/A
SH2D4A	ENST00000265807.3	SH2 domain containing 4A	131	1	1	0	0	0	hsa-miR-1178-3p	-0.28	-0.34	N/A
IQGAP2	ENST00000274364.6	IQ motif containing GTPase activating protein 2	588	2	0	2	0	0	hsa-miR-1178-3p	-0.28	-0.29	N/A
TBL1XR1	ENST00000430069.1	transducin (beta)-like 1 X-linked receptor 1	334	2	1	1	0	4	hsa-miR-1178-3p	-0.28	-0.46	N/A
SNTB2	ENST00000336278.4	syntrophin, beta 2 (dystrophin-associated protein A1, 59kDa, basic component 2)	254	3	0	2	1	2	hsa-miR-1178-3p	-0.28	-0.33	N/A
CANT1	ENST00000392446.5	calcium activated nucleotidase 1	538	2	0	1	1	0	hsa-miR-1178-3p	-0.28	-0.29	N/A
FAM69C	ENST00000400291.2	family with sequence similarity 69, member C	5	1	0	1	0	1	hsa-miR-1178-3p	-0.28	-0.28	N/A
NDUFS2	ENST00000392179.4	NADH dehydrogenase (ubiquinone) Fe-S protein 2, 49kDa (NADH-coenzyme Q reductase)	843	1	0	1	0	1	hsa-miR-1178-3p	-0.28	-0.28	N/A
SIX6	ENST00000327720.5	SIX homeobox 6	5	2	0	1	1	0	hsa-miR-1178-3p	-0.28	-0.28	N/A
EHF	ENST00000257831.3	ets homologous factor	5	1	1	0	0	0	hsa-miR-1178-3p	-0.28	-0.28	N/A
CHST4	ENST00000338482.5	carbohydrate (N-acetylglucosamine 6-O) sulfotransferase 4	15	1	0	1	0	0	hsa-miR-1178-3p	-0.28	-0.28	N/A
DPY19L1	ENST00000310974.4	dpy-19-like 1 (C. elegans)	80	1	1	0	0	1	hsa-miR-1178-3p	-0.27	-0.32	N/A
FADS3	ENST00000540820.1	fatty acid desaturase 3	62	1	0	1	0	0	hsa-miR-1178-3p	-0.27	-0.3	N/A
RAET1E	ENST00000532335.1	retinoic acid early transcript 1E	129	1	0	1	0	0	hsa-miR-1178-3p	-0.27	-0.31	N/A
PADI1	ENST00000375471.4	peptidyl arginine deiminase, type I	5	1	0	1	0	0	hsa-miR-1178-3p	-0.27	-0.27	N/A
PDPK1	ENST00000441549.3	3-phosphoinositide dependent protein kinase-1	104	2	1	1	0	0	hsa-miR-1178-3p	-0.27	-0.29	N/A
[truncated: 3,536 more rows]
