# Supplementary material for: Exosomal hsa_circ_0007047 Attenuates Pos-myocardial Infarction Remodeling by Promoting Angiogenesis via miR-1178-3p/PDPK1 Axis
Source: Research Square preprint supplement (doi:10.21203/rs.3.rs-827822/v1), 2021-09-01
Supplement: Supplementary file 3 [file 553db51abe6e588fbe964b5a.xlsx]

## Sheet: Sheet1
Gene	Primers	Sequence（5’-3')	Tm	Product (bp)
hsa_circ_0000212	Divergent-F	CTGGTCGATCTTTGCTGTGG	58.92	111
	Divergent-R	AAAATTACCAAGAAGCCTCCCA	57.87
hsa_circ_0007047	Divergent-F	TCTTGGAAGTTTATTACAAA	57.99	115
	Divergent-R	CAAAGTACGGGCCATCATCTAA	58.2
	Convergent-F	GATGGCCCGTACTTTGGAACCA	58.19	113
	Convergent-R	GGCTTGTGTGCATCTTGCTAA	58.44
hsa_circ_0089282	Divergent-F	TGTTGGCCTCCTCTATCGTC	58.89	105
	Divergent-R	TCGGCAGGAAATTTTCGTACT	57.95
miR-1178-3p	RT	GTCGTATCCAGTGCAGGGTCCGAGGTATTCGCACTGGATACGACCTAGGG
	Forward	GCGCGTTGCTCACTGTTCTT	61.3
	Reverse	AGTGCAGGGTCCGAGGTATT	58.5
U6	Forward	CTCGCTTCGGCAGCACA	60.42
	Reverse	AACGCTTCACGAATTTGCGT	59.69
miR-1178-3p mimics	Sence	UUGCUCACUGUUCUUCCCUAG
	Antisence	CTAGGGAAGAACAGTGAGCAA
miR-1178-3p inhibitor	Antisence	CTAGGGAAGAACAGTGAGCAA
miR-1178-3p NC	Sence	UUUGUACUACACAAAAGUACUG
	Antisence	CAGUACUUUUGUGUAGUACAAA
GAPDH	Convergent-F	AAAGCCTGCCGGTGACTAAC	60.61	118
	Convergent-R	AGGAAAAGCATCACCCGGAG	60.04
	Divergent-F	TCAAGTGGGGCGATGCTGGC
	Divergent-R	TGCACCACCAACTGCTTAGC
β-Actin	Forward	CCTCGCCTTTGCCGATCC	60.9	70
	Reverse	CGCGGCGATATCATCATCC	58.71
PDPK1	Forward	TTCCGAGCTGGAAACGAGTAT	60.9	91
	Reverse	GGTCTCTTGCCTTAGGGAAGAA	61.1
CHRNB4	Forward	AACCCGTTACAATAACCTGATCC	60	97
	Reverse	ATTCACGCTGATAAGCTGGGC	62.8
STON2	Forward	ACCATGTGATTGCCACCCAC	62.8	132
	Reverse	AGCTCTCGGACTGGTCTGG	62.7
PDPK1-pmiGLO	Forward	GCTAGCagatggctggtcatgcc	57.9	400
	Reverse	TCTAGAttatagtaaatggaca	58.4
hsa_circ_0007047-pmiGLO	Forward	GCTAGCGATGGCCCGTACTTTGG	59.56	246
	Reverse	TCTAGAATCTAATTTTTGCTGTT	59.34
