# Supplementary material for: Exosomal hsa_circ_0007047 Attenuates Pos-myocardial Infarction Remodeling by Promoting Angiogenesis via miR-1178-3p/PDPK1 Axis
Source: Research Square preprint supplement (doi:10.21203/rs.3.rs-827822/v1), 2021-09-01
Supplement: Supplementary file 4 [file acc739574b18c79dda7b55c5.docx]

**Supplementary Table 1. Inclusion and exclusion criteria**

| **A. Inclusion criteria** | **B. Exclusion criteria** |
| --- | --- |
| 1.Aged 18 years or over and under 80 years  2.First-time myocardial infarction on admission  3.Presence of STEMI successfully treated with coronary recanalization using PCI within 12 h after the symptom onset  4.Willingness to provide informed consent prior to enrollment  5.Able to comply with all follow-up evaluations (in the investigators opinion).  6.LV-remodelling defined as > 20% change in LV end-diastolic volume index [LVEDVi] assessed using echocardiography | 1.Previous MI  2.Documented malignant arrhythmia  3.Severe heart failure (NYHA cardiac function class IV or left ventricular ejection fraction≤30 %) or cardiogenic shock  4.Serious impairment of renal function (glomerular filtration rate ≤50 mL/min per 1.73 m2)  5.Hypohepatia (elevated of alanine aminotransferase and aspartate aminotransferase serum levels)  6.Severe coagulopathy prior to randomization  7.Significant neuropsychiatric condition precluding the ability to provide written informed consent  8.Pregnant and lactating women  9.Life expectancy of < 1 year |

LVEDVi, left ventricular end-diastolic volume index; NYHA, New York Heart Association; PCI, percutaneous coronary intervention; STEMI, ST-elevation myocardial infarction.

**Supplementary Table 2. Participant characteristics**

|  | CR  (n=10) | N-CR  (n=10) | control  (n=10) |
| --- | --- | --- | --- |
| Age (years) | 65.3±11.2 | 64.2±9.3 | 64.5±6.8 |
| Heart rate (beats/min) | 82.1±10.5 | 83.3±11.2 | 81.4±9.4 |
| Systolic blood pressure (mmHg) | 136.4±22.4 | 134.8±24.5 | 130.1±20.1 |
| Peak NT-proBNP (ng/L) | 4452.4±321.3 | 201.1±64.4 | 23.4±11.6 |
| LVEDVi, mL/m2 | 67.3±6.5 | 48.9±8.3 | 47.6±6.9 |
| LEVSVi, mL/m2 | 34.2±8.6 | 31.4±6.4 | 30.6±7.0 |
| LVEF, % | 34.9±11.8 | 63.4±10.2 | 65.6±5.9 |

CR, cardiac remodelling after myocardial infarction; LVEDVi, left ventricular end-diastolic volume index; LVESVi, left ventricular end-systolic volume index; LVEF, left ventricular ejection fraction; N-CR, non-cardiac remodelling after myocardial infarction; NT-proBNP, N-terminal pro-brain natriuretic peptide.
